# Supplementary material for: Hyperpositive non-linear effects: enantiodivergence and modelling
Source: Royal Society of Chemistry journal article supplement (doi:10.1039/d0sc04724d), 2020-01-01
Supplement: d0sc04724d2.xlsx [file d0sc04724d2.xlsx]

## Sheet: Figure 2a
(-)-NME	ZnMe2
Benzaldehyde	(1.2M/Toluene)	Ligand	Toluene	T°	Cat. Loading [mol%]	reaction time	Ligand ee [%]	Experiment	Area H-Benz	Area R-Product	Area S-Product	Product ee	Mean Product ee	st. deviation	Conversion	Mean Conversion	st. deviation		alc/Benz response ratio
51 µL	0.50 mL	17.9 mg	0.40 mL	0°C	20	4 days	100	625 A	40512	33307	41528	-0.109855			0.609943				1.1813
500 µmol	0.60 mmol	100 µmol						625 B	30557	29329	36132	-0.103924			0.644568
0.56M								625 C	31127	32710	40414	-0.105355	-0.106378	0.00252688	0.665403	0.639971	0.0228736		Ligand ee	Product ee [%]	st. Dev.
						4 days	80	661 A	18961	18979	20986	-0.0502189			0.640838				100	-10.6378	0.252688
								661 B	22092	22911	25606	-0.0555475			0.650237				80	-5.40625	0.274109
								661 C	27794	20746	23227	-0.056421	-0.0540625	0.00274109	0.57252	0.621199	0.0346342		60	-2.56417	0.294709
						4 days	60	661 D	21344	30670	32089	-0.0226103			0.713392				50	-1.14655	0.134693
								661 E	20196	25246	26788	-0.0296345			0.685636				40	-0.137989	0.236791
								661 F	17530	27485	28876	-0.0246802	-0.0256417	0.00294709	0.731304	0.710111	0.0187875		20	0.00137212	0.180153
						4 days	50	625 D	24992	42040	43071	-0.0121136			0.742458
								625 E	25281	45698	46583	-0.00959027			0.755501
								625 F	18944	44143	45278	-0.0126928	-0.0114655	0.00134693	0.799833	0.765931	0.0245569
						4 days	40	661 G	22223	26963	27198	-0.00433892			0.673535
								661 H	17110	21645	21582	0.00145742			0.681394
								661 I	15587	15876	15916	-0.00125818	-0.00137989	0.00236791	0.633245	0.662725	0.021091
						4 days	20	661 J	21305	24298	24421	-0.00252468			0.659375
								661 K	16545	25519	25444	0.00147166			0.722801
								661 L	15478	27905	27844	0.00109419	1.37212e-05	0.00180153	0.753027	0.711735	0.0390259
(-)-NBE	(results published initially in ref. 10)
51 µL	0.50 mL	25.5 mg	0.10 mL	0°C	20	4 days	100	392 B	19235	44438	32016	0.162477			0.77089
500 µmol	0.60 mmol	100 µmol						392 C	9728	36338	25938	0.166999	0.164738	0.00226087	0.844218	0.807554	0.0366641
0.83M						7 days	80	394 T	15612	35385	22914	0.213914			0.759681
								394 U	12940	34118	21769	0.220964	0.217439	0.00352463	0.785227	0.772454	0.0127733		100	16.4738	0.226087
						7 days	60	394 P	21414	38887	23575	0.245141			0.71175				80	21.7439	0.352463
								394 Q	14737	34203	20842	0.242729			0.759725				60	24.3935	1.67531
								394 R	19281	36121	20344	0.279412	0.243935	0.0167531	0.712567	0.728014	0.0224257		40	30.2526	0.945538
						7 days	40	394 M	105974	44515	24372	0.292406			0.354952				30	35.6725	1.14562
								394 N	31661	42467	22866	0.300017			0.635942				15	43.392	0.257535
								394 O	21774	30146	15698	0.315156	0.302526	0.00945538	0.640587	0.543827	0.133568		10	49.3625	0.896425
						7 days	30	394 J	34489	35461	16919	0.35399			0.562489				5	52.9607	0.440773
								394 K	26565	32513	15860	0.344262			0.606526				4	50.1935	0.709513
								394 L	23842	33562	15365	0.371921	0.356725	0.0114562	0.634661	0.601225	0.0297016		3	46.9812	1.45152
						7 days	15	394 G	35081	36874	14594	0.43289			0.55396				2	31.7498	3.89707
								394 H	33723	44028	17489	0.431409			0.606952				1	18.1769	2.48535
								394 I	35917	48515	18986	0.43746	0.43392	0.00257535	0.614038	0.59165	0.0268071
						7 days	10	394 D	31384	30569	10435	0.491025			0.525168
								394 E	43906	36611	12724	0.48418			0.487494
								394 F	25717	34982	11485	0.505671	0.493625	0.00896425	0.604673	0.539112	0.0488435
						7 days	5	394 A	58803	26511	8014	0.535757			0.332006
								394 B	55384	25142	7779	0.527414			0.334746
								394 C	60467	27866	8664	0.52565	0.529607	0.00440773	0.338367	0.33504	0.00260506
						30 days	4	402 A	42293	29357	9893	0.495898			0.43997
								402 B	55950	38356	12383	0.511894			0.434288
								402 C	46245	33715	11298	0.498012	0.501935	0.00709513	0.451746	0.442001	0.00727082
						30 days	3	402 D	45176	31513	10948	0.484327			0.443099
								402 E	43826	29950	11210	0.455296	0.469812	0.0145152	0.442906	0.443002	9.6279e-05
						30 days	2	402 G	40673	19644	11056	0.279739			0.389856
								402 H	54795	26068	13987	0.30161			0.382261
								402 I	52194	27366	12551	0.371145	0.317498	0.0389707	0.392985	0.388368	0.00450278
						30 days	1	402 J	49298	20007	13155	0.206622			0.362832
								402 L	28334	20386	14856	0.156915	0.181769	0.0248535	0.512887	0.43786	0.0750277

## Sheet: Figure 2b
Note: The data for 20 mol% catalyst loading is found in the sheet for Figure 2a
(-)-NME	ZnMe2
Benzaldehyde	(1.2M/Toluene)	Ligand	Toluene	T°	Ligand ee [%]	reaction time	Cat. loading [mol%]	Experiment	Area H-Benz	Area R-Product	Area S-Product	Product ee	Mean Product ee	st. deviation	Conversion	Mean Conversion	st. deviation		alc/Benz response ratio
53 µL	0.50 mL	14.0 mg	0.43 mL	0 °C	100	7 days	15	624 A	23446	30690	35825	-0.0772006			0.706016				1.1813
522 µmol	0.60 mmol	78.3 µmol						624 B	32173	36557	43114	-0.082301			0.677031
0.56 M								624 C	29261	35877	41496	-0.0726222	-0.0773746	0.00395324	0.691207	0.691418	0.0118338		Cat. Loading [mol%]	Product ee [%]	st. Dev.
55 µL	0.50 mL	9.8 mg	0.47 mL			7 days	10	624 D	44692	37310	40095	-0.0359796			0.59451				20	-10.6378	0.252688
545 µmol	0.60 µmol	54.6 µmol						624 E	32199	40426	42566	-0.0257856			0.685722				15	-7.73746	0.395324
0.56 M								624 F	27825	38726	40555	-0.0230698	-0.0282783	0.00555732	0.706915	0.662382	0.0487666		10	-2.82783	0.555732
116 µL	1.0 mL	10.2 mg	1.0 mL			7 days	5	624 G	42282	40817	34124	0.0893103			0.600062				5	9.37219	0.762597
1.14 mmol	1.2 mmol	57.1 µmol						624 H	42499	33516	28128	0.0874051			0.55114				2.5	20.2914	2.97916
0.56 M								624 I	53199	22459	18211	0.10445	0.0937219	0.00762597	0.392894	0.514699	0.0884145
178 µL	1.5 mL	7.8 mg	1.6 mL			7 days	2.5	624 J	24460	25939	18275	0.173339			0.604772
1.76 mmol	1.8 mmol	44 µmol						624 K	67756	25911	15757	0.243688			0.34236
0.56 M								624 L	22852	23565	15983	0.191716	0.202914	0.0297916	0.594322	0.513818	0.121314
(-)-NBE	(results published initially in ref. 10)
53 µL	0.50 mL	20.0 mg	0.13 mL	0°C	100	7 days	15	395 A	28326	40984	27318	0.200082			0.671184
522 µmol	0.60 mmol	78.3 µmol						395 B	29178	35213	23303	0.203534			0.629313
0.83 M								395 C	33558	39813	26874	0.194026	0.199214	0.00392996	0.627176	0.642557	0.0202606
55 µL	0.50 mL	13.9 mg	0.15 mL			7 days	10	395 D	34779	37384	21729	0.264832			0.589965
545 µmol	0.6 µmol	54.6 µmol						395 E	31217	36399	20576	0.277718			0.607075
0.83 M								395 F	27254	38243	20729	0.296988	0.279846	0.0132138	0.646856	0.614632	0.0238323
116 µL	1.0 mL	14.6 mg	0.37 mL			7 days	5	395 G	46949	39192	17928	0.372269			0.507369
1.14 mmol	1.2 mmol	57.1 µmol						395 H	47201	24937	10371	0.412541			0.387716
0.83 M								395 I	37542	34497	15171	0.389104	0.391305	0.00841737	0.528291	0.474459	0.0619279		20	16.4738	0.226087
178 µL	1.5 mL	11.2 mg	0.61 mL			7 days	2.5	403 A	19153	46273	16161	0.482301			0.734004				15	19.9214	0.392996
1.76 mmol	1.8 mmol	43.9 µmol						403 C	25298	56411	18413	0.507832	0.495067	0.0127652	0.714593	0.724299	0.00970559		10	27.9846	1.32138
																			5	39.1305	0.841737
																			2.5	49.5067	1.27652

## Sheet: Figure 3a
(-)-NME	ZnMe2
Benzaldehyde	(1.2M/Toluene)	Ligand	Toluene	T°	Catalyst loading	reaction time	ligand ee	Experiment	Area H-Benz	Area R-Product	Area S-Product	Product ee	Mean Product ee	st. deviation	Conversion	Mean Conversion	st. deviation		alc/Benz response ratio
51 µL	0.50 mL	17.9 mg	0.40 mL	12°C	20 mol%	48h	100	618 A	1054	12847	15660	-0.0986775			0.958151				1.1813
500 µmol	0.60 mmol	100 µmol						618 B	22490	22616	26532	-0.0796777			0.649115
0.56M								618 C	12005	21787	25052	-0.0697069	-0.0826874	0.0120172	0.767594	0.79162	0.127302
						48h	50	618 D	7831	31383	31290	0.00148389			0.871381
								618 E	12842	23613	23752	-0.00293466			0.757413				Temperature [°C]	Product ee @ 100% eeL [%]	st. Dev.	Product ee @ 50% eeL [%]	st. Dev.
								618 F	16896	24710	24937	-0.00457228	-0.00200768	0.00255783	0.713255	0.780683	0.0666188		0	-10.6378	0.252688	-1.14655	0.134693
				40°C		48h	100	618 M	27482	54452	48559	0.0572075			0.760366				12	-8.26874	1.20172	-0.200768	0.255783
								618 N	16553	51047	44751	0.0657216			0.830484				22.5	-1.75934	0.673293	1.74634	0.15634
								618 O	18020	49984	43846	0.0654162	0.0627818	0.00394358	0.815084	0.801978	0.030088		40	6.27818	0.394358	4.86778	0.391753
						48h	50	618 P	8106	51982	47255	0.0476334			0.911999
								618 Q	17446	46862	42870	0.044488			0.813225
								618 R	11832	50211	45074	0.0539119	0.0486778	0.00391753	0.872077	0.865767	0.0405705

## Sheet: Figure 3b
(-)-NME	ZnMe2
Benzaldehyde	(1.2M/Toluene)	Ligand	Toluene	T°	Catalyst loading	reaction time	ligand ee	Experiment	Area H-Benz	Area R-Product	Area S-Product	Product ee	Mean Product ee	st. deviation	Conversion	Mean Conversion	st. deviation		alc/Benz response ratio
51 µL	0.50 mL	17.9 mg	0.40 mL	20-25°C	20 mol%	48h	100	618 G	8685	21399	21963	-0.0130068			0.808667				1.1813
500 µmol	0.60 mmol	100 µmol						618 H	7338	23123	23716	-0.0126604			0.843834
0.56M								618 I	8018	31451	33204	-0.0271131	-0.0175934	0.00673293	0.872223	0.841575	0.0259959
						48h	90	622 A	17913	50963	52148	-0.0114925			0.829723
								622 B	25238	47641	49384	-0.0179644			0.764948
								622 C	20393	44746	46029	-0.0141338	-0.0145303	0.002657	0.790274	0.794982	0.0266528
						48h	80	622 D	22134	50230	50376	-0.00145121			0.793718
								622 E	18081	47016	46596	0.0044866			0.814222				Ligand ee	Product ee [%]	st. Dev.
								622 F	23703	50122	50243	-0.0012056	0.000609933	0.00274305	0.78187	0.796603	0.0133644		100	-1.75934	0.673293
						48h	70	622 G	19723	53529	53193	0.00314837			0.820807				90	-1.45303	0.2657
								622 H	22990	48825	48519	0.00314349			0.781866				80	0.0609933	0.274305
								622 I	16479	44494	43957	0.00607116	0.00412101	0.00137897	0.819616	0.80743	0.0180826		70	0.412101	0.137897
						48h	60	620 D	17875	43808	42781	0.0118606			0.803948				60	1.23734	0.0806066
								620 E	16929	48382	47092	0.0135115			0.826814				50	1.74634	0.15634
								620 F	19013	43835	42817	0.0117481	0.0123734	0.000806066	0.794156	0.808306	0.0136838		40	1.57513	0.173619
						48h	50	618 J	4347	24663	23760	0.0186482			0.904121				30	1.08872	0.101165
								618 K	10064	22642	21820	0.0184877			0.789024				20	1.04306	0.0975345
								618 L	3909	25424	24660	0.0152544	0.0174634	0.0015634	0.915584	0.869576	0.0571508		10	0.109641	0.184476
						48h	40	620 G	23160	38922	37686	0.0161341			0.73685
								620 H	16915	48577	46891	0.0176604			0.826923
								620 I	19094	47098	45847	0.0134596	0.0157513	0.00173619	0.804713	0.789495	0.0383143
						48h	30	622 J	12598	51747	50771	0.00952028			0.873237
								622 K	15259	49552	48383	0.0119365			0.844555
								622 L	20176	51983	50831	0.0112047	0.0108872	0.00101165	0.81181	0.843201	0.0250957
						48h	20	620 J	14466	49221	48072	0.0118097			0.850599
								620 K	14596	45095	44227	0.00971765			0.838199
								620 L	6560	52585	51568	0.00976448	0.0104306	0.000975345	0.930749	0.873182	0.0410195
						48h	10	622 M	25895	48111	48181	-0.000726956			0.758911
								622 N	15466	48187	47839	0.00362402			0.840152
								622 O	16008	49742	49703	0.000392177	0.00109641	0.00184476	0.840225	0.813096	0.0383144
(+)-NME
51 µL	0.50 mL	17.9 mg	0.40 mL	20-25°C	20 mol%	48h	100	621 A	39259	48254	46066	0.0231976			0.670378				100	1.65413	0.618535
500 µmol	0.60 mmol	100 µmol						621 B	21312	48847	48043	0.00829807			0.793752				90	0.933524	0.0567126
0.56M								621 C	21580	51108	49288	0.0181282	0.0165413	0.00618535	0.7975	0.753877	0.059062		80	-0.126308	0.249368
						48h	90	623 A	22384	48387	47566	0.00855627			0.78396				70	-0.990369	0.162785
								623 B	20691	59564	58436	0.00955932			0.828406				60	-1.15397	0.136462
								623 C	24481	53353	52308	0.00989012	0.00933524	0.000567126	0.785114	0.79916	0.0206851		50	-1.25982	0.371834
						48h	80	621 D	20408	50673	50695	-0.000217031			0.807868				40	-1.83808	0.0886457
								621 E	21356	54016	53894	0.00113057			0.810513				30	-1.84054	0.0580689
								621 F	13966	55344	55867	-0.00470277	-0.00126308	0.00249368	0.870815	0.829732	0.0290703		20	-1.83896	0.165673
						48h	70	623 M	30164	50488	51583	-0.0107278			0.741236				10	-0.884005	0.21893
								623 N	27068	49293	50051	-0.00763005			0.756506
								623 O	17181	46240	47302	-0.0113532	-0.00990369	0.00162785	0.821712	0.773152	0.0348988
						48h	60	621 G	18861	49976	51286	-0.0129367			0.819653
								621 H	21345	59236	60395	-0.00968812			0.825919
								621 I	19210	50248	51468	-0.0119942	-0.0115397	0.00136462	0.817595	0.821056	0.00354019
						48h	50	621 J	26474	59580	60743	-0.00966565			0.793704
								621 K	9394	55287	56436	-0.0102844			0.909647
								621 L	15982	55865	57895	-0.0178446	-0.0125982	0.00371834	0.857663	0.853672	0.0474175
						48h	40	621 M	19813	55889	57886	-0.0175522			0.829384
								621 N	16214	50711	52568	-0.0179804			0.843558
								621 O	16837	58019	60340	-0.0196098	-0.0183808	0.000886457	0.856132	0.843025	0.0109263
						48h	30	623 G	16849	46064	47713	-0.0175843			0.824916
								623 H	19450	50603	52545	-0.0188273			0.817828
								623 I	10917	51422	53393	-0.0188046	-0.0184054	0.000580689	0.890442	0.844395	0.0326881
						48h	20	621 P	22828	47018	48804	-0.0186387			0.780381
								621 Q	16191	48287	49882	-0.0162475			0.836938
								621 R	16001	50332	52416	-0.0202826	-0.0183896	0.00165673	0.84462	0.820646	0.028644
						48h	10	623 J	19077	49159	49729	-0.0057641			0.814405
								623 K	112219	52412	53544	-0.0106837			0.444222
								623 L	17356	55185	56308	-0.0100724	-0.00884005	0.0021893	0.844672	0.7011	0.18206

## Sheet: Sup. Figure 5a NBE
(results published initially in ref. 10)								20 mol%			17.5 mol%			15 mol%			12.5 mol%			10 mol%			7.5 mol%			5 mol%			2.5 mol%			saturated 0% eeL
						t(h)	Area	% Benz	(% Benz)-1	Area	% Benz	(% Benz)-1	Area	% Benz	(% Benz)-1	Area	% Benz	(% Benz)-1	Area	% Benz	(% Benz)-1	Area	% Benz	(% Benz)-1	Area	% Benz	(% Benz)-1	Area	% Benz	(% Benz)-1	Area	% Benz	(% Benz)-1
						0.0197222	8.3821	100	0.01	8.67979	100	0.01	8.36509	100	0.01	8.61792	100	0.01	9.08644	100	0.01	8.57173	100	0.01	9.03414	100	0.01	9.16817	100	0.01	9.28637	100	0.01
						0.103056	8.0806	96.403	0.0103731	8.36883	96.4174	0.0103716				8.36252	97.0364	0.0103054	8.89	97.8381	0.010221	8.35967	97.5261	0.0102537	8.8773	98.2639	0.0101767	9.0876	99.1212	0.0100887	9.27774	99.9071	0.0100093
						0.186389	7.83504	93.4735	0.0106982	8.13247	93.6943	0.010673	7.91353	94.6019	0.0105706	8.15743	94.6566	0.0105645	8.73334	96.114	0.0104043	8.18409	95.4777	0.0104737	8.78517	97.2441	0.0102834	9.01647	98.3454	0.0101682	9.25262	99.6366	0.0100365
						0.269722	7.63003	91.0277	0.0109857	7.93561	91.4263	0.0109378	7.74995	92.6463	0.0107937	7.98547	92.6612	0.010792	8.61609	94.8236	0.0105459	8.10232	94.5237	0.0105794	8.6265	95.4878	0.0104725	8.97999	97.9475	0.0102096	9.26125	99.7295	0.0100271
						0.353056	7.44687	88.8425	0.0112559	7.73859	89.1564	0.0112162	7.58127	90.6299	0.0110339	7.87723	91.4052	0.0109403	8.45322	93.0312	0.0107491	7.95951	92.8577	0.0107692	8.53269	94.4494	0.0105877	8.93858	97.4958	0.0102569	9.23477	99.4443	0.0100559
						0.436389	7.28384	86.8976	0.0115078	7.55849	87.0815	0.0114835	7.42318	88.74	0.0112689	7.7063	89.4218	0.011183	8.31041	91.4595	0.0109338	7.79034	90.8841	0.011003	8.44177	93.443	0.0107017	8.86603	96.7045	0.0103408	9.19132	98.9765	0.0101034
						0.519722	7.10385	84.7502	0.0117994	7.41777	85.4602	0.0117013	7.33961	87.741	0.0113972	7.562	87.7474	0.0113964	8.19617	90.2022	0.0110862	7.72959	90.1754	0.0110895	8.3458	92.3807	0.0108248	8.84771	96.5046	0.0103622	9.14981	98.5295	0.0101492
						0.603056	6.94454	82.8496	0.0120701	7.24368	83.4546	0.0119826	7.19359	85.9954	0.0116285	7.43798	86.3083	0.0115864	8.07385	88.856	0.0112542	7.59854	88.6465	0.0112808	8.24141	91.2252	0.0109619	8.82177	96.2217	0.0103927	9.13162	98.3336	0.0101695
						0.686389	6.76662	80.727	0.0123874	7.09126	81.6985	0.0122401	7.04932	84.2707	0.0118665	7.31216	84.8483	0.0117857	7.97186	87.7336	0.0113981	7.50173	87.5171	0.0114263	8.19847	90.7499	0.0110193	8.75576	95.5017	0.010471	9.14179	98.4431	0.0101582
						0.769722	6.61913	78.9674	0.0126634	6.92487	79.7815	0.0125342	6.96466	83.2586	0.0120108	7.19148	83.448	0.0119835	7.84448	86.3317	0.0115832	7.38558	86.1621	0.011606	8.11153	89.7875	0.0111374	8.71022	95.005	0.0105258	9.09047	97.8905	0.0102155
						0.853056	6.52112	77.7982	0.0128538	6.8446	78.8567	0.0126812	6.8309	81.6596	0.012246	7.10468	82.4408	0.0121299	7.74193	85.2031	0.0117367	7.29886	85.1504	0.0117439	8.04834	89.0881	0.0112248	8.68604	94.7413	0.0105551	9.07213	97.693	0.0102362
						0.936389	6.36657	75.9544	0.0131658	6.65604	76.6843	0.0130405	6.69881	80.0805	0.0124874	7.00107	81.2385	0.0123094	7.61071	83.759	0.011939	7.21964	84.2262	0.0118728	7.9482	87.9796	0.0113663	8.62611	94.0876	0.0106284	9.05965	97.5586	0.0102503
						1.01972	6.2184	74.1867	0.0134795	6.56183	75.5989	0.0132277	6.63516	79.3196	0.0126072	6.90874	80.1671	0.0124739	7.49971	82.5374	0.0121157	7.1242	83.1127	0.0120318	7.87085	87.1234	0.011478	8.54963	93.2534	0.0107235	9.05223	97.4787	0.0102587
						1.10306	6.12595	73.0837	0.0136829	6.39245	73.6475	0.0135782	6.48531	77.5283	0.0128985	6.81705	79.1032	0.0126417	7.41951	81.6548	0.0122467	7.00373	81.7073	0.0122388	7.81738	86.5315	0.0115565	8.54147	93.1644	0.0107337	9.02863	97.2245	0.0102855
						1.18639	5.98486	71.4005	0.0140055	6.29589	72.535	0.0137864	6.40461	76.5636	0.013061	6.69218	77.6542	0.0128776	7.34574	80.8429	0.0123697	6.92975	80.8442	0.0123695	7.72892	85.5524	0.0116887	8.50341	92.7493	0.0107818	8.97987	96.6995	0.0103413
						1.26972	5.88721	70.2355	0.0142378	6.17151	71.1021	0.0140643	6.26903	74.9428	0.0133435	6.55872	76.1056	0.0131396	7.22618	79.5271	0.0125743	6.84433	79.8477	0.0125238	7.67311	84.9346	0.0117738	8.40111	91.6334	0.010913	8.9562	96.4446	0.0103686
						1.35306	5.77334	68.877	0.0145186	6.0375	69.5581	0.0143765	6.20548	74.1831	0.0134802	6.45497	74.9017	0.0133508	7.13535	78.5275	0.0127344	6.73695	78.595	0.0127235	7.5765	83.8652	0.0119239	8.39356	91.5511	0.0109229	8.90302	95.8719	0.0104306
						1.43639	5.67686	67.726	0.0147654	5.93981	68.4326	0.0146129	6.07641	72.6401	0.0137665	6.38182	74.0529	0.0135039	7.03799	77.456	0.0129106	6.63857	77.4473	0.012912	7.53827	83.442	0.0119844	8.34788	91.0528	0.0109826	8.89595	95.7958	0.0104389
						1.51972	5.60078	66.8183	0.014966	5.85525	67.4584	0.0148239	6.00357	71.7693	0.0139335	6.30224	73.1295	0.0136744	6.97044	76.7126	0.0130357	6.56998	76.6471	0.0130468	7.46333	82.6125	0.0121047	8.30792	90.617	0.0110355	8.88227	95.6485	0.010455
						1.60306	5.45503	65.0795	0.0153658	5.75909	66.3506	0.0150715	5.92367	70.8142	0.0141215	6.18837	71.8082	0.013926	6.85781	75.473	0.0132498	6.47484	75.5371	0.0132385	7.4153	82.0809	0.0121831	8.26215	90.1178	0.0110966	8.87183	95.536	0.0104673
						1.68639	5.38532	64.2479	0.0155647	5.68349	65.4796	0.0152719	5.8089	69.4422	0.0144005	6.12786	71.106	0.0140635	6.76284	74.4278	0.0134358	6.40626	74.7371	0.0133802	7.33152	81.1535	0.0123223	8.17897	89.2105	0.0112094	8.85084	95.31	0.0104921
						1.76972	5.26685	62.8345	0.0159148	5.60439	64.5683	0.0154875	5.71081	68.2696	0.0146478	6.04452	70.139	0.0142574	6.69666	73.6995	0.0135686	6.34741	74.0505	0.0135043	7.2568	80.3264	0.0124492	8.12691	88.6427	0.0112812	8.81667	94.942	0.0105327
						1.85306	5.21485	62.2141	0.0160735	5.49715	63.3328	0.0157896	5.61072	67.073	0.0149091	5.96286	69.1914	0.0144527	6.61639	72.8161	0.0137332	6.27607	73.2182	0.0136578	7.22397	79.963	0.0125058	8.11028	88.4613	0.0113044	8.79563	94.7155	0.0105579
						1.93639	5.09868	60.8282	0.0164397	5.42472	62.4983	0.0160004	5.53593	66.179	0.0151105	5.91079	68.5872	0.01458	6.51363	71.6852	0.0139499	6.21134	72.4631	0.0138001	7.15346	79.1825	0.012629	8.08629	88.1996	0.0113379	8.79589	94.7183	0.0105576
						2.01972	5.02899	59.9968	0.0166676	5.35507	61.6958	0.0162085	5.46064	65.2789	0.0153189	5.82015	67.5354	0.014807	6.45842	71.0776	0.0140691	6.13595	71.5836	0.0139697	7.09731	78.561	0.012729	8.03481	87.6381	0.0114106	8.75495	94.2774	0.010607
						2.10306	4.96012	59.1751	0.016899	5.26405	60.6472	0.0164888	5.37472	64.2518	0.0155638	5.75284	66.7544	0.0149803	6.38472	70.2665	0.0142315	6.07059	70.8211	0.0141201	7.01595	77.6604	0.0128766	8.00403	87.3024	0.0114544	8.73539	94.0668	0.0106307
						2.18639	4.90524	58.5204	0.0170881	5.17443	59.6147	0.0167744	5.27606	63.0724	0.0158548	5.69437	66.0759	0.0151341	6.31692	69.5203	0.0143843	5.98553	69.8287	0.0143208	6.96404	77.0858	0.0129726	7.96281	86.8528	0.0115137	8.7303	94.012	0.0106369
						2.26972	4.81985	57.5017	0.0173908	5.12589	59.0555	0.0169332	5.19029	62.047	0.0161168	5.62255	65.2425	0.0153274	6.23006	68.5644	0.0145848	5.88574	68.6646	0.0145636	6.93868	76.8051	0.01302	7.92901	86.4841	0.0115628	8.6637	93.2948	0.0107187
						2.35306	4.74295	56.5843	0.0176728	5.05403	58.2276	0.017174	5.12784	61.3005	0.0163131	5.57102	64.6446	0.0154692	6.16623	67.8619	0.0147358	5.83826	68.1106	0.014682	6.84126	75.7267	0.0132054	7.8836	85.9888	0.0116294	8.66872	93.3489	0.0107125
						2.43639	4.653	55.5111	0.0180144	4.98478	57.4297	0.0174126	5.06197	60.513	0.0165254	5.53514	64.2283	0.0155695	6.0869	66.9888	0.0149279	5.79868	67.6489	0.0147822	6.8047	75.3221	0.0132763	7.83144	85.4199	0.0117069	8.66481	93.3067	0.0107173
						2.51972	4.5857	54.7082	0.0182788	4.93651	56.8736	0.0175828	5.02058	60.0182	0.0166616	5.41256	62.8059	0.0159221	6.05346	66.6208	0.0150103	5.75036	67.0852	0.0149064	6.75671	74.7908	0.0133706	7.81176	85.2052	0.0117364	8.62764	92.9065	0.0107635
						2.60306	4.54345	54.2042	0.0184488	4.85716	55.9594	0.0178701	4.96227	59.3212	0.0168574	5.40067	62.6679	0.0159571	5.97071	65.7101	0.0152184	5.6615	66.0485	0.0151404	6.67888	73.9293	0.0135264	7.76135	84.6554	0.0118126	8.57516	92.3414	0.0108294
						2.68639	4.48619	53.5211	0.0186842	4.79909	55.2904	0.0180863	4.89455	58.5116	0.0170906	5.33794	61.94	0.0161447	5.92909	65.2521	0.0153252	5.59537	65.277	0.0153193	6.63889	73.4867	0.0136079	7.72056	84.2105	0.011875	8.61108	92.7282	0.0107842
						2.76972	4.40596	52.5639	0.0190245	4.74775	54.6989	0.0182819	4.8565	58.0568	0.0172245	5.27212	61.1762	0.0163462	5.86048	64.497	0.0155046	5.54128	64.646	0.0154689	6.57042	72.7288	0.0137497	7.69208	83.8998	0.011919	8.58013	92.3949	0.0108231
						2.85306	4.36542	52.0803	0.0192011	4.70011	54.15	0.0184672	4.80312	57.4186	0.017416	5.19945	60.333	0.0165747	5.78513	63.6677	0.0157065	5.46548	63.7617	0.0156834	6.53829	72.3731	0.0138173	7.64492	83.3855	0.0119925	8.52829	91.8366	0.0108889
						2.93639	4.28975	51.1775	0.0195398	4.60804	53.0893	0.0188362	4.74901	56.7718	0.0176144	5.15479	59.8148	0.0167183	5.71987	62.9495	0.0158857	5.41241	63.1426	0.0158372	6.45354	71.435	0.0139987	7.62102	83.1248	0.0120301	8.52451	91.7959	0.0108937
						3.01972	4.23563	50.5318	0.0197895	4.5747	52.7052	0.0189735	4.71009	56.3065	0.0177599	5.08293	58.9809	0.0169546	5.66685	62.366	0.0160344	5.36868	62.6324	0.0159662	6.42357	71.1033	0.014064	7.60386	82.9376	0.0120573	8.51523	91.696	0.0109056
						3.10306	4.20798	50.202	0.0199195	4.51037	51.964	0.0192441	4.65647	55.6655	0.0179644	5.03658	58.4431	0.0171107	5.59432	61.5678	0.0162423	5.28995	61.7139	0.0162038	6.38544	70.6812	0.014148	7.55358	82.3892	0.0121375	8.50909	91.6299	0.0109135
						3.18639	4.13104	49.2841	0.0202905	4.45926	51.3752	0.0194646	4.6157	55.1781	0.0181231	5.02178	58.2714	0.0171611	5.51725	60.7196	0.0164691	5.22467	60.9523	0.0164063	6.33218	70.0917	0.014267	7.50746	81.8861	0.0122121	8.41869	90.6564	0.0110307
						3.26972	4.10685	48.9955	0.02041	4.41904	50.9118	0.0196418	4.57066	54.6397	0.0183017	4.90187	56.88	0.0175809	5.50939	60.6331	0.0164926	5.15486	60.1379	0.0166284	6.27582	69.4678	0.0143952	7.45469	81.3106	0.0122985	8.4365	90.8482	0.0110074
						3.35306	4.04449	48.2515	0.0207247	4.38082	50.4715	0.0198132	4.51736	54.0025	0.0185177	4.84169	56.1817	0.0177994	5.44906	59.9691	0.0166752	5.11533	59.6768	0.0167569	6.23284	68.9921	0.0144944	7.43122	81.0546	0.0123374	8.39348	90.3849	0.0110638
						3.43639	4.01471	47.8962	0.0208785	4.33402	49.9323	0.0200271	4.49164	53.6951	0.0186237	4.7704	55.3544	0.0180654	5.39796	59.4068	0.0168331	5.05295	58.949	0.0169638	6.17306	68.3304	0.0146348	7.38809	80.5841	0.0124094	8.4071	90.5316	0.0110459
						3.51972	3.94421	47.0552	0.0212517	4.26719	49.1624	0.0203408	4.43745	53.0472	0.0188511	4.69592	54.4902	0.0183519	5.33333	58.6955	0.0170371	5.00966	58.444	0.0171104	6.13804	67.9427	0.0147183	7.3394	80.0531	0.0124917	8.37983	90.238	0.0110818
						3.60306	3.90168	46.5478	0.0214833	4.20935	48.496	0.0206203	4.39226	52.507	0.0190451	4.66728	54.1578	0.0184645	5.28218	58.1326	0.0172021	4.9711	57.9941	0.0172431	6.10035	67.5255	0.0148092	7.32801	79.9288	0.0125111	8.36954	90.1271	0.0110954
						3.68639	3.88503	46.3491	0.0215754	4.16126	47.9419	0.0208586	4.30816	51.5017	0.0194169	4.61672	53.5712	0.0186668	5.25323	57.814	0.0172969	4.90647	57.2401	0.0174703	6.03362	66.7869	0.014973	7.29589	79.5785	0.0125662	8.3469	89.8833	0.0111255
						3.76972	3.8379	45.7869	0.0218403	4.12688	47.5459	0.0210323	4.27236	51.0737	0.0195796	4.56379	52.957	0.0188833	5.20446	57.2772	0.0174589	4.86413	56.7462	0.0176223	6.01891	66.6241	0.0150096	7.25203	79.1001	0.0126422	8.34697	89.8841	0.0111254
						3.85306	3.81197	45.4775	0.0219889	4.11166	47.3705	0.0211102	4.23881	50.6726	0.0197345	4.50611	52.2877	0.019125	5.15654	56.7498	0.0176212	4.80136	56.0139	0.0178527	5.96459	66.0228	0.0151463	7.20565	78.5942	0.0127236	8.27672	89.1276	0.0112199
						3.93639	3.73435	44.5515	0.0224459	4.03777	46.5192	0.0214965	4.18165	49.9893	0.0200043	4.48535	52.0468	0.0192135	5.11797	56.3254	0.017754	4.80083	56.0077	0.0178547	5.91406	65.4635	0.0152757	7.17396	78.2485	0.0127798	8.25933	88.9404	0.0112435
						4.01972	3.70132	44.1574	0.0226462	4.02466	46.3682	0.0215665	4.14134	49.5074	0.020199	4.45471	51.6912	0.0193456	5.06356	55.7266	0.0179448	4.72484	55.1212	0.0181418	5.88048	65.0918	0.0153629	7.13133	77.7836	0.0128562	8.24942	88.8336	0.011257
						4.10306	3.67232	43.8115	0.0228251	3.96476	45.6781	0.0218923	4.10284	49.0472	0.0203885	4.42804	51.3818	0.0194622	5.01317	55.172	0.0181251	4.7162	55.0204	0.0181751	5.84595	64.7095	0.0154537	7.11268	77.5801	0.0128899	8.21802	88.4955	0.0113
						4.18639	3.63506	43.3669	0.023059	3.94302	45.4276	0.0220131	4.06041	48.5399	0.0206016	4.37081	50.7177	0.019717	5.00253	55.0549	0.0181637	4.64488	54.1884	0.0184541	5.79852	64.1845	0.0155801	7.10294	77.4739	0.0129076	8.21769	88.492	0.0113005
						4.26972	3.59718	42.915	0.0233019	3.91087	45.0572	0.022194	4.06054	48.5415	0.0206009	4.35368	50.5189	0.0197946	4.941	54.3777	0.0183899	4.59435	53.5989	0.0186571	5.76424	63.8051	0.0156727	7.04705	76.8643	0.0130099	8.22122	88.53	0.0112956
						4.35306	3.549	42.3402	0.0236182	3.83892	44.2283	0.02261	4.00405	47.8662	0.0208916	4.30204	49.9197	0.0200322	4.88427	53.7534	0.0186035	4.5893	53.54	0.0186776	5.71122	63.2182	0.0158182	7.0191	76.5594	0.0130617	8.20762	88.3835	0.0113143
						4.43639	3.53103	42.1258	0.0237384	3.85474	44.4105	0.0225172	3.96269	47.3718	0.0211096	4.23369	49.1266	0.0203556	4.85621	53.4446	0.018711	4.54297	52.9995	0.0188681	5.67939	62.8659	0.0159069	6.98631	76.2018	0.0131231	8.15618	87.8296	0.0113857
						4.51972	3.49725	41.7228	0.0239677	3.80657	43.8556	0.0228021	3.89884	46.6085	0.0214553	4.16968	48.3838	0.0206681	4.82042	53.0507	0.0188499	4.51373	52.6583	0.0189903	5.61327	62.134	0.0160943	6.97516	76.0802	0.013144	8.15198	87.7844	0.0113916
						4.60306	3.47024	41.4006	0.0241542	3.77835	43.5304	0.0229724	3.87161	46.2829	0.0216062	4.14913	48.1454	0.0207704	4.79063	52.7228	0.0189671	4.49618	52.4536	0.0190645	5.60095	61.9976	0.0161297	6.90413	75.3054	0.0132793	8.14706	87.7314	0.0113984
						4.68639	3.42794	40.896	0.0244523	3.75221	43.2293	0.0231325	3.83994	45.9043	0.0217844	4.08364	47.3854	0.0211035	4.75087	52.2853	0.0191258	4.47172	52.1682	0.0191688	5.55598	61.4998	0.0162602	6.91398	75.4129	0.0132603	8.118	87.4184	0.0114392
						4.76972	3.39027	40.4465	0.024724	3.6921	42.5367	0.0235091	3.80927	45.5377	0.0219598	4.06864	47.2114	0.0211813	4.72084	51.9548	0.0192475	4.43439	51.7327	0.0193301	5.53382	61.2545	0.0163253	6.87508	74.9886	0.0133354	8.07863	86.9945	0.011495
						4.85306	3.33657	39.8059	0.0251219	3.6838	42.4411	0.0235621	3.76576	45.0176	0.0222136	4.03708	46.8452	0.0213469	4.68416	51.5511	0.0193982	4.39098	51.2263	0.0195212	5.49363	60.8097	0.0164448	6.83265	74.5258	0.0134182	8.07079	86.9101	0.0115061
						4.93639	3.36241	40.1142	0.0249288	3.63181	41.8421	0.0238994	3.7555	44.8949	0.0222742	3.99895	46.4027	0.0215505	4.65303	51.2085	0.019528	4.37977	51.0955	0.0195712	5.45725	60.407	0.0165544	6.80852	74.2626	0.0134657	8.05624	86.7534	0.0115269
						5.01972	3.3235	39.65	0.0252207	3.6254	41.7683	0.0239416	3.70916	44.3409	0.0225525	3.9722	46.0923	0.0216956	4.61373	50.776	0.0196943	4.34139	50.6478	0.0197442	5.42357	60.0342	0.0166572	6.77892	73.9397	0.0135245	8.03232	86.4958	0.0115613
						5.10306	3.29145	39.2676	0.0254663	3.5935	41.4008	0.0241541	3.67956	43.9871	0.0227339	3.94785	45.8098	0.0218294	4.574	50.3387	0.0198654	4.29738	50.1343	0.0199464	5.3636	59.3703	0.0168434	6.73528	73.4637	0.0136122	8.02599	86.4276	0.0115704
						5.18639	3.24081	38.6635	0.0258642	3.57892	41.2328	0.0242525	3.61059	43.1626	0.0231682	3.90349	45.295	0.0220775	4.55905	50.1742	0.0199306	4.29116	50.0618	0.0199753	5.35663	59.2932	0.0168653	6.71202	73.21	0.0136593	8.01157	86.2724	0.0115912
						5.26972	3.22821	38.5131	0.0259652	3.53897	40.7725	0.0245263	3.61178	43.1768	0.0231606	3.88241	45.0504	0.0221973	4.52368	49.785	0.0200864	4.2463	49.5384	0.0201864	5.31278	58.8078	0.0170045	6.69618	73.0373	0.0136916	8.01403	86.2988	0.0115876
						5.35306	3.19432	38.1088	0.0262406	3.51564	40.5037	0.0246891	3.56353	42.6	0.0234742	3.83767	44.5313	0.0224561	4.49967	49.5207	0.0201936	4.21899	49.2198	0.020317	5.27751	58.4174	0.0171182	6.67508	72.8071	0.0137349	7.99515	86.0955	0.011615
						5.43639	3.17496	37.8779	0.0264006	3.50261	40.3536	0.0247809	3.53587	42.2694	0.0236578	3.79995	44.0936	0.022679	4.45399	49.018	0.0204007	4.18721	48.8491	0.0204712	5.21768	57.7551	0.0173145	6.63418	72.361	0.0138196	7.95914	85.7078	0.0116676
						5.51972	3.13896	37.4484	0.0267034	3.43201	39.5402	0.0252907	3.53582	42.2688	0.0236581	3.74271	43.4294	0.0230259	4.41774	48.619	0.0205681	4.15117	48.4286	0.0206489	5.21588	57.7352	0.0173205	6.61019	72.0993	0.0138698	7.95194	85.6302	0.0116781
						5.60306	3.13203	37.3657	0.0267625	3.42545	39.4647	0.0253391	3.50103	41.8529	0.0238932	3.72662	43.2427	0.0231253	4.39413	48.3592	0.0206786	4.15059	48.4218	0.0206518	5.19169	57.4675	0.0174012	6.58069	71.7776	0.0139319	7.91088	85.1881	0.0117387
						5.68639	3.11102	37.115	0.0269433	3.42865	39.5015	0.0253155	3.45759	41.3336	0.0241934	3.69918	42.9243	0.0232968	4.35989	47.9824	0.020841	4.13785	48.2732	0.0207154	5.14842	56.9885	0.0175474	6.56058	71.5582	0.0139746	7.92973	85.3911	0.0117108
						5.76972	3.07401	36.6735	0.0272676	3.38329	38.9789	0.0256549	3.43852	41.1056	0.0243276	3.66767	42.5586	0.023497	4.35169	47.8921	0.0208803	4.10092	47.8424	0.020902	5.11237	56.5894	0.0176711	6.56182	71.5718	0.013972	7.92089	85.2959	0.0117239
						5.85306	3.04642	36.3444	0.0275146	3.38212	38.9655	0.0256638	3.38442	40.4589	0.0247165	3.67253	42.615	0.0234659	4.29771	47.2981	0.0211425	4.08256	47.6282	0.020996	5.07709	56.1989	0.0177939	6.48277	70.7095	0.0141424	7.88487	84.908	0.0117775
						5.93639	3.00185	35.8126	0.0279231	3.35121	38.6093	0.0259005	3.37301	40.3225	0.0248001	3.61381	41.9337	0.0238472	4.30606	47.39	0.0211015	4.05867	47.3495	0.0211196	5.06811	56.0995	0.0178255	6.4654	70.5201	0.0141804	7.8733	84.7834	0.0117948
						6.01972	2.9923	35.6987	0.0280122	3.32316	38.2862	0.0261191	3.35994	40.1662	0.0248965	3.58613	41.6125	0.0240313	4.24488	46.7166	0.0214056	4.04706	47.214	0.0211801	5.05108	55.911	0.0178856	6.44569	70.3051	0.0142237	7.84426	84.4707	0.0118384
						6.10306	2.99962	35.786	0.0279439	3.30454	38.0717	0.0262663	3.3288	39.794	0.0251294	3.55775	41.2832	0.0242229	4.21804	46.4213	0.0215419	4.02265	46.9293	0.0213087	4.99113	55.2474	0.0181004	6.40378	69.848	0.0143168	7.81131	84.1159	0.0118884
						6.18639	2.95909	35.3025	0.0283266	3.29334	37.9426	0.0263556	3.32224	39.7155	0.0251791	3.54323	41.1147	0.0243222	4.19779	46.1984	0.0216458	3.99812	46.6431	0.0214394	4.96414	54.9487	0.0181988	6.40103	69.818	0.014323	7.83642	84.3863	0.0118503
						6.26972	2.93227	34.9825	0.0285857	3.23002	37.2131	0.0268722	3.32383	39.7345	0.025167	3.47943	40.3744	0.0247682	4.18169	46.0212	0.0217291	3.98115	46.4451	0.0215308	4.91319	54.3847	0.0183875	6.39983	69.8049	0.0143256	7.77923	83.7704	0.0119374
						6.35306	2.91955	34.8308	0.0287102	3.2378	37.3027	0.0268077	3.25795	38.947	0.0256759	3.45675	40.1112	0.0249307	4.15449	45.7219	0.0218714	3.92301	45.7668	0.0218499	4.90538	54.2983	0.0184168	6.3438	69.1937	0.0144522	7.78358	83.8173	0.0119307
						6.43639	2.90993	34.716	0.0288052	3.20147	36.8842	0.0271119	3.23605	38.6852	0.0258497	3.43724	39.8848	0.0250722	4.1314	45.4678	0.0219936	3.89251	45.411	0.0220211	4.89609	54.1954	0.0184517	6.32776	69.0188	0.0144888	7.76882	83.6583	0.0119534
						6.51972	2.89477	34.5351	0.028956	3.17656	36.5972	0.0273245	3.20517	38.316	0.0260987	3.41848	39.6671	0.0252098	4.10324	45.1578	0.0221445	3.89761	45.4705	0.0219923	4.84848	53.6684	0.0186329	6.28425	68.5442	0.0145891	7.72082	83.1414	0.0120277
						6.60306	2.88899	34.4662	0.0290139	3.14311	36.2118	0.0276153	3.19122	38.1493	0.0262128	3.39114	39.3499	0.025413	4.08107	44.9138	0.0222648	3.86568	45.098	0.0221739	4.81708	53.3208	0.0187544	6.27301	68.4216	0.0146153	7.73356	83.2786	0.0120079
						6.68639	2.84103	33.894	0.0295037	3.15737	36.3761	0.0274906	3.15757	37.747	0.0264922	3.35375	38.916	0.0256964	4.05534	44.6307	0.0224061	3.84823	44.8944	0.0222745	4.8037	53.1727	0.0188066	6.24077	68.07	0.0146908	7.71881	83.1198	0.0120308
						6.76972	2.82878	33.7479	0.0296315	3.12622	36.0172	0.0277645	3.15254	37.6869	0.0265344	3.36299	39.0232	0.0256258	4.03132	44.3663	0.0225396	3.82466	44.6195	0.0224117	4.78517	52.9676	0.0188795	6.23418	67.9981	0.0147063	7.66157	82.5034	0.0121207
						6.85306	2.79501	33.345	0.0299895	3.13034	36.0647	0.0277279	3.12698	37.3813	0.0267513	3.33998	38.7562	0.0258023	4.00025	44.0244	0.0227147	3.79686	44.2951	0.0225758	4.749	52.5673	0.0190232	6.17879	67.3939	0.0148381	7.6724	82.62	0.0121036
						6.93639	2.79716	33.3706	0.0299665	3.08623	35.5565	0.0281242	3.11014	37.18	0.0268962	3.2794	38.0533	0.026279	3.988	43.8896	0.0227845	3.78153	44.1163	0.0226674	4.75577	52.6422	0.0189962	6.16955	67.2931	0.0148604	7.65238	82.4044	0.0121353
						7.01972	2.75572	32.8762	0.0304171	3.07334	35.408	0.0282422	3.06769	36.6725	0.0272684	3.28514	38.1199	0.026233	3.94145	43.3773	0.0230535	3.75667	43.8263	0.0228174	4.69262	51.9432	0.0192518	6.15787	67.1657	0.0148885	7.64346	82.3084	0.0121494
						7.10306	2.76273	32.9599	0.0303399	3.08636	35.558	0.0281231	3.04432	36.3932	0.0274777	3.24704	37.6778	0.0265408	3.93887	43.3489	0.0230686	3.75024	43.7513	0.0228565	4.66482	51.6355	0.0193665	6.11706	66.7206	0.0149879	7.6266	82.1268	0.0121763
						7.18639	2.73955	32.6833	0.0305966	3.03004	34.9091	0.0286458	3.01718	36.0687	0.0277249	3.21493	37.3052	0.0268059	3.91654	43.1031	0.0232002	3.71379	43.326	0.0230808	4.66173	51.6013	0.0193794	6.07704	66.2841	0.0150866	7.60512	81.8955	0.0122107
						7.26972	2.7323	32.5968	0.0306778	3.00762	34.6508	0.0288593	3.01745	36.0719	0.0277224	3.21867	37.3486	0.0267748	3.91666	43.1045	0.0231995	3.71243	43.3102	0.0230893	4.63861	51.3453	0.019476	6.10442	66.5828	0.0150189	7.5981	81.8199	0.012222
						7.35306	2.69567	32.1598	0.0310947	3.0243	34.843	0.0287002	2.98906	35.7326	0.0279857	3.1858	36.9672	0.027051	3.87301	42.6241	0.0234609	3.66647	42.774	0.0233787	4.6411	51.3729	0.0194655	6.05611	66.0558	0.0151387	7.57634	81.5856	0.0122571
						7.43639	2.69802	32.1879	0.0310676	3.01341	34.7175	0.0288039	2.97965	35.6201	0.0280741	3.18323	36.9373	0.0270729	3.86213	42.5043	0.023527	3.64515	42.5253	0.0235154	4.60323	50.9537	0.0196257	6.02394	65.7049	0.0152196	7.50894	80.8598	0.0123671
						7.51972	2.68887	32.0787	0.0311733	2.98103	34.3445	0.0291167	2.94334	35.186	0.0284204	3.11884	36.1902	0.0276318	3.83637	42.2208	0.023685	3.65753	42.6697	0.0234358	4.55623	50.4335	0.0198281	6.01695	65.6287	0.0152372	7.57613	81.5833	0.0122574
						7.60306	2.64438	31.5479	0.0316978	2.97359	34.2588	0.0291896	2.94601	35.2179	0.0283946	3.13416	36.3679	0.0274967	3.80258	41.849	0.0238955	3.63536	42.411	0.0235788	4.5259	50.0977	0.019961	6.01819	65.6422	0.0152341	7.54102	81.2053	0.0123145
						7.68639	2.66173	31.7549	0.0314912	2.96967	34.2136	0.0292281	2.92881	35.0123	0.0285614	3.11708	36.1697	0.0276474	3.78188	41.6211	0.0240263	3.59701	41.9636	0.0238302	4.48843	49.683	0.0201276	5.96859	65.1012	0.0153607	7.50166	80.7814	0.0123791
						7.76972	2.62289	31.2916	0.0319575	2.93367	33.7989	0.0295868	2.89166	34.5682	0.0289283	3.10239	35.9993	0.0277783	3.77799	41.5783	0.024051	3.594	41.9285	0.0238501	4.5085	49.9051	0.020038	5.9696	65.1122	0.0153581	7.52632	81.047	0.0123385
						7.85306	2.63131	31.392	0.0318552	2.8985	33.3937	0.0299458	2.882	34.4527	0.0290253	3.07821	35.7187	0.0279965	3.73582	41.1142	0.0243225	3.5749	41.7057	0.0239775	4.47415	49.5249	0.0201919	5.94076	64.7977	0.0154327	7.47883	80.5356	0.0124169
						7.93639	2.59467	30.9549	0.0323051	2.8975	33.3821	0.0299561	2.85787	34.1642	0.0292704	3.06147	35.5245	0.0281496	3.7252	40.9974	0.0243918	3.53506	41.2409	0.0242478	4.45514	49.3145	0.020278	5.90534	64.4113	0.0155252	7.49733	80.7348	0.0123862
						8.01972	2.56536	30.6052	0.0326742	2.88296	33.2146	0.0301072	2.87852	34.4111	0.0290604	3.03233	35.1863	0.0284201	3.70335	40.7569	0.0245357	3.5386	41.2822	0.0242235	4.43727	49.1167	0.0203597	5.87836	64.117	0.0155965	7.5117	80.8895	0.0123625
						8.10306	2.59204	30.9235	0.0323378	2.89453	33.3479	0.0299869	2.85923	34.1805	0.0292564	3.01293	34.9612	0.0286031	3.70197	40.7417	0.0245449	3.50853	40.9314	0.0244311	4.39805	48.6826	0.0205412	5.88731	64.2147	0.0155728	7.47367	80.48	0.0124254
						8.18639	2.54952	30.4162	0.0328772	2.85671	32.9122	0.0303839	2.83385	33.8771	0.0295185	3.0007	34.8193	0.0287197	3.68782	40.586	0.0246391	3.48365	40.6412	0.0246056	4.39161	48.6113	0.0205714	5.85187	63.8281	0.0156671	7.46099	80.3434	0.0124466
						8.26972	2.55517	30.4836	0.0328045	2.86747	33.0362	0.0302699	2.84339	33.9911	0.0294194	2.99243	34.7233	0.0287991	3.68179	40.5196	0.0246794	3.47573	40.5488	0.0246617	4.35592	48.2162	0.0207399	5.83609	63.656	0.0157094	7.42356	79.9404	0.0125093
						8.35306	2.54521	30.3648	0.0329328	2.84981	32.8327	0.0304574	2.81484	33.6498	0.0297178	2.97792	34.555	0.0289394	3.65236	40.1957	0.0248783	3.4575	40.3361	0.0247917	4.3574	48.2326	0.0207329	5.82414	63.5257	0.0157417	7.44811	80.2048	0.0124681
						8.43639	2.53248	30.213	0.0330984	2.79535	32.2053	0.0310508	2.78737	33.3215	0.0300107	2.94071	34.1232	0.0293056	3.61704	39.807	0.0251212	3.44314	40.1686	0.0248951	4.35103	48.1621	0.0207632	5.79929	63.2546	0.0158091	7.43159	80.0269	0.0124958
						8.51972	2.50851	29.927	0.0334147	2.80729	32.3428	0.0309188	2.7856	33.3003	0.0300298	2.93269	34.0301	0.0293857	3.58873	39.4954	0.0253194	3.41552	39.8463	0.0250964	4.31488	47.7619	0.0209372	5.78694	63.1199	0.0158429	7.40236	79.7121	0.0125451
						8.60306	2.48521	29.649	0.0337279	2.80306	32.2941	0.0309654	2.75607	32.9473	0.0303515	2.90618	33.7225	0.0296538	3.54342	38.9968	0.0256431	3.36887	39.3021	0.0254439	4.29902	47.5864	0.0210144	5.75784	62.8025	0.0159229	7.34939	79.1417	0.0126356
						8.68639	2.48576	29.6556	0.0337205	2.79496	32.2008	0.0310551	2.76276	33.0273	0.030278	2.8978	33.6253	0.0297395	3.49944	38.5128	0.0259654	3.40526	39.7266	0.025172	4.27191	47.2863	0.0211478	5.73823	62.5886	0.0159773	7.36413	79.3004	0.0126103
						8.76972	2.48596	29.658	0.0337178	2.79228	32.1699	0.031085	2.75029	32.8782	0.0304153	2.86764	33.2753	0.0300523	3.45867	38.0641	0.0262715	3.36929	39.307	0.0254408	4.28636	47.4462	0.0210765	5.71752	62.3627	0.0160352	7.34847	79.1318	0.0126371
						8.85306	2.45219	29.2551	0.0341821	2.73803	31.5449	0.0317009	2.71664	32.4759	0.030792	2.87585	33.3706	0.0299665	3.43513	37.805	0.0264515	3.35738	39.1681	0.025531	4.21052	46.6068	0.0214561	5.70216	62.1952	0.0160784	7.37996	79.4709	0.0125832
						8.93639	2.46444	29.4012	0.0340122	2.76018	31.8001	0.0314465	2.71079	32.406	0.0308585	2.86745	33.2731	0.0300543	3.40471	37.4702	0.0266879	3.32691	38.8126	0.0257648	4.23423	46.8692	0.021336	5.67993	61.9527	0.0161413	7.3602	79.2581	0.012617
						9.01972	2.44114	29.1233	0.0343368	2.73874	31.5531	0.0316926	2.66331	31.8384	0.0314086	2.84862	33.0546	0.030253	3.34913	36.8585	0.0271307	3.31553	38.6798	0.0258533	4.21172	46.62	0.02145	5.66254	61.763	0.0161909	7.33206	78.9551	0.0126654
						9.10306	2.43928	29.1011	0.034363	2.7298	31.4501	0.0317964	2.66833	31.8984	0.0313495	2.83102	32.8504	0.030441	3.38926	37.3002	0.0268095	3.29944	38.4921	0.0259793	4.20878	46.5875	0.021465	5.63276	61.4382	0.0162765	7.31844	78.8084	0.012689
						9.18639	2.44934	29.2211	0.0342219	2.71663	31.2983	0.0319506	2.65464	31.7347	0.0315112	2.77841	32.2399	0.0310175	3.35413	36.9136	0.0270903	3.28093	38.2762	0.0261259	4.17282	46.1895	0.02165	5.60847	61.1733	0.016347	7.27762	78.3688	0.0127602
						9.26972	2.40335	28.6724	0.0348767	2.70123	31.1209	0.0321327	2.68326	32.0769	0.0311751	2.81559	32.6713	0.0306079	3.36251	37.0058	0.0270228	3.27026	38.1517	0.0262112	4.15117	45.9498	0.0217629	5.6144	61.238	0.0163297	7.27241	78.3127	0.0127693
						9.35306	2.42506	28.9314	0.0345645	2.67954	30.871	0.0323928	2.64079	31.5692	0.0316765	2.79586	32.4424	0.0308239	3.3745	37.1378	0.0269268	3.23189	37.7041	0.0265223	4.14041	45.8307	0.0218194	5.5844	60.9107	0.0164175	7.28127	78.4081	0.0127538
						9.43639	2.39352	28.5551	0.03502	2.66231	30.6725	0.0326025	2.66129	31.8142	0.0314325	2.77104	32.1544	0.0310999	3.37389	37.131	0.0269316	3.24444	37.8505	0.0264198	4.11829	45.5859	0.0219366	5.57996	60.8623	0.0164305	7.26992	78.2859	0.0127737
						9.51972	2.39106	28.5258	0.035056	2.68486	30.9323	0.0323287	2.66706	31.8832	0.0313645	2.75372	31.9534	0.0312956	3.33683	36.7232	0.0272308	3.23498	37.7401	0.026497	4.10262	45.4124	0.0220204	5.55435	60.583	0.0165063	7.24466	78.0139	0.0128182
						9.60306	2.39017	28.5152	0.0350691	2.67986	30.8747	0.032389	2.60642	31.1583	0.0320942	2.73939	31.7871	0.0314593	3.3844	37.2467	0.026848	3.21044	37.4538	0.0266995	4.05983	44.9388	0.0222525	5.54092	60.4365	0.0165463	7.24932	78.0641	0.01281
						9.68639	2.37087	28.2849	0.0353545	2.66666	30.7226	0.0325493	2.61276	31.2341	0.0320163	2.70654	31.406	0.0318411	3.35585	36.9325	0.0270764	3.20572	37.3988	0.0267389	4.05093	44.8402	0.0223014	5.51032	60.1027	0.0166382	7.17517	77.2656	0.0129424
						9.76972	2.36349	28.1969	0.0354649	2.64565	30.4806	0.0328078	2.57653	30.801	0.0324665	2.70683	31.4093	0.0318377	3.35831	36.9596	0.0270566	3.19081	37.2248	0.0268638	4.03849	44.7025	0.0223701	5.48674	59.8455	0.0167097	7.19652	77.4955	0.012904
						9.85306	2.36763	28.2463	0.0354029	2.62754	30.2719	0.0330339	2.5686	30.7062	0.0325667	2.70552	31.3941	0.0318531	3.3603	36.9815	0.0270406	3.1733	37.0205	0.027012	3.99796	44.2539	0.0225969	5.48574	59.8346	0.0167127	7.13532	76.8365	0.0130147
						9.93639	2.34001	27.9168	0.0358208	2.6112	30.0837	0.0332406	2.55027	30.4871	0.0328008	2.68245	31.1264	0.032127	3.34386	36.8006	0.0271735	3.16791	36.9577	0.027058	4.00008	44.2774	0.0225849	5.4378	59.3117	0.0168601	7.15302	77.0271	0.0129824
						10.0197	2.32845	27.7788	0.0359986	2.62277	30.217	0.033094	2.53262	30.2761	0.0330294	2.67434	31.0323	0.0322245	3.32997	36.6477	0.0272869	3.14484	36.6885	0.0272565	3.96771	43.9191	0.0227692	5.44377	59.3768	0.0168416	7.09075	76.3565	0.0130965
						10.1031	2.32791	27.7724	0.036007	2.60297	29.9889	0.0333457	2.55959	30.5985	0.0326814	2.70224	31.3561	0.0318918	3.30073	36.3259	0.0275286	3.12787	36.4905	0.0274044	3.99708	44.2442	0.0226018	5.422	59.1394	0.0169092	7.14494	76.9401	0.0129971
						10.1864	2.31127	27.5739	0.0362662	2.6172	30.1528	0.0331644	2.52028	30.1285	0.0331911	2.64841	30.7314	0.03254	3.30118	36.3308	0.0275248	3.1021	36.1899	0.027632	3.95616	43.7912	0.0228356	5.42385	59.1596	0.0169034	7.10351	76.4939	0.0130729
						10.2697	2.30619	27.5133	0.0363461	2.59894	29.9424	0.0333974	2.51802	30.1015	0.0332209	2.60878	30.2716	0.0330343	3.30268	36.3473	0.0275123	3.11155	36.3001	0.0275481	3.95209	43.7462	0.0228591	5.37147	58.5882	0.0170683	7.09899	76.4453	0.0130813
						10.3531	2.29585	27.3899	0.0365098	2.57967	29.7204	0.0336469	2.50606	29.9586	0.0333794	2.62189	30.4237	0.0328691	3.27886	36.0852	0.0277122	3.09373	36.0922	0.0277068	3.9171	43.3589	0.0230633	5.38244	58.7079	0.0170335	7.07136	76.1477	0.0131324
						10.4364	2.30066	27.4473	0.0364335	2.58894	29.8272	0.0335264	2.49496	29.8259	0.033528	2.63913	30.6237	0.0326544	3.26973	35.9847	0.0277896	3.07061	35.8225	0.0279154	3.8992	43.1607	0.0231692	5.35745	58.4353	0.0171129	7.07363	76.1722	0.0131282
						10.5197	2.26154	26.9806	0.0370637	2.57176	29.6293	0.0337504	2.46479	29.4652	0.0339383	2.61118	30.2994	0.0330039	3.27225	36.0125	0.0277682	3.05043	35.5871	0.0281001	3.89236	43.085	0.0232099	5.35442	58.4023	0.0171226	7.07551	76.1924	0.0131247
						10.6031	2.27844	27.1822	0.0367888	2.55641	29.4524	0.033953	2.49171	29.787	0.0335717	2.58537	29.9999	0.0333334	3.27161	36.0054	0.0277736	3.03751	35.4364	0.0282196	3.88021	42.9505	0.0232826	5.32954	58.1309	0.0172026	7.04591	75.8737	0.0131798
						10.6864	2.25247	26.8724	0.0372129	2.5479	29.3544	0.0340664	2.44061	29.1761	0.0342746	2.59069	30.0617	0.033265	3.24879	35.7543	0.0279687	3.03082	35.3583	0.0282819	3.84563	42.5677	0.023492	5.29749	57.7813	0.0173066	7.03857	75.7946	0.0131935
						10.7697	2.26117	26.9762	0.0370697	2.54763	29.3513	0.0340701	2.47868	29.6312	0.0337482	2.59451	30.106	0.033216	3.26031	35.881	0.0278699	3.0219	35.2543	0.0283654	3.82689	42.3603	0.023607	5.2803	57.5938	0.017363	6.99801	75.3579	0.01327
						10.8531	2.2507	26.8513	0.0372422	2.52245	29.0612	0.0344102	2.43808	29.1459	0.0343102	2.58251	29.9667	0.0333703	3.23821	35.6378	0.0280601	3.004	35.0454	0.0285344	3.82702	42.3618	0.0236062	5.31668	57.9906	0.0172442	6.94519	74.7891	0.0133709
						10.9364	2.24512	26.7847	0.0373348	2.52405	29.0796	0.0343883	2.43534	29.1131	0.0343488	2.57019	29.8238	0.0335303	3.23068	35.555	0.0281255	3.01689	35.1958	0.0284125	3.82422	42.3308	0.0236235	5.27594	57.5463	0.0173773	6.93447	74.6736	0.0133916
						11.0197	2.25081	26.8526	0.0372404	2.53537	29.21	0.0342348	2.4358	29.1186	0.0343423	2.52105	29.2536	0.0341839	3.19666	35.1806	0.0284248	2.99198	34.9052	0.028649	3.82594	42.3498	0.0236129	5.30921	57.9092	0.0172684	6.95167	74.8589	0.0133585
						11.1031	2.25026	26.846	0.0372495	2.52267	29.0637	0.0344072	2.45038	29.2929	0.0341379	2.52048	29.247	0.0341916	3.18635	35.0671	0.0285168	2.97041	34.6536	0.0288571	3.80359	42.1024	0.0237516	5.20403	56.7619	0.0176174	6.96599	75.0131	0.013331
						11.1864	2.20208	26.2712	0.0380645	2.50574	28.8687	0.0346396	2.38875	28.5562	0.0350187	2.50115	29.0227	0.0344558	3.20139	35.2326	0.0283828	2.97785	34.7404	0.028785	3.73425	41.3349	0.0241926	5.24846	57.2465	0.0174683	6.96709	75.0249	0.0133289
						11.2697	2.1927	26.1593	0.0382273	2.47513	28.516	0.035068	2.38975	28.5681	0.035004	2.51679	29.2041	0.0342417	3.17228	34.9122	0.0286432	2.97721	34.7329	0.0287912	3.76414	41.6657	0.0240005	5.21152	56.8436	0.0175921	6.90502	74.3565	0.0134487
						11.3531	2.21015	26.3675	0.0379255	2.50069	28.8105	0.0347096	2.38822	28.5498	0.0350265	2.49574	28.9599	0.0345305	3.18522	35.0547	0.0285269	2.94022	34.3014	0.0291534	3.73535	41.347	0.0241855	5.18667	56.5726	0.0176764	6.92025	74.5205	0.0134191
						11.4364	2.21182	26.3874	0.0378968	2.49349	28.7275	0.0348098	2.36181	28.2341	0.0354181	2.47599	28.7307	0.034806	3.15364	34.7071	0.0288125	2.92287	34.099	0.0293264	3.7304	41.2923	0.0242176	5.19968	56.7145	0.0176322	6.88715	74.1641	0.0134836
						11.5197	2.1857	26.0758	0.0383497	2.50506	28.8608	0.034649	2.35273	28.1256	0.0355548	2.45572	28.4955	0.0350933	3.14253	34.5848	0.0289144	2.93481	34.2382	0.0292071	3.70414	41.0016	0.0243893	5.17095	56.4011	0.0177301	6.86498	73.9253	0.0135272
						11.6031	2.17907	25.9967	0.0384664	2.47597	28.5257	0.0350561	2.36386	28.2586	0.0353874	2.47617	28.7328	0.0348034	3.11619	34.2949	0.0291588	2.90166	33.8515	0.0295408	3.71166	41.0848	0.0243399	5.14563	56.1249	0.0178174	6.86514	73.9271	0.0135268
						11.6864	2.17291	25.9232	0.0385755	2.45153	28.2441	0.0354056	2.34337	28.0137	0.0356968	2.46302	28.5802	0.0349892	3.10603	34.1831	0.0292542	2.89981	33.8299	0.0295596	3.68638	40.805	0.0245068	5.13001	55.9546	0.0178716	6.88146	74.1028	0.0134948
						11.7697	2.16356	25.8117	0.0387422	2.45824	28.3214	0.035309	2.34357	28.0161	0.0356938	2.48098	28.7886	0.034736	3.12141	34.3524	0.02911	2.90027	33.8353	0.0295549	3.6932	40.8805	0.0244616	5.09887	55.6149	0.0179808	6.87428	74.0255	0.0135089
						11.8531	2.18342	26.0486	0.0383898	2.44858	28.2101	0.0354483	2.31671	27.695	0.0361076	2.45427	28.4787	0.035114	3.1149	34.2808	0.0291709	2.86444	33.4173	0.0299246	3.65532	40.4612	0.024715	5.12412	55.8903	0.0178922	6.81977	73.4385	0.0136168
						11.9364	2.17103	25.9008	0.0386089	2.43549	28.0593	0.0356388	2.33066	27.8617	0.0358915	2.43605	28.2673	0.0353766	3.10156	34.1339	0.0292964	2.86609	33.4365	0.0299074	3.64795	40.3796	0.024765	5.11128	55.7503	0.0179371	6.83931	73.6489	0.0135779
						12.0197	2.15273	25.6825	0.0389371	2.45394	28.2719	0.0353708	2.30718	27.5811	0.0362568	2.42164	28.1001	0.0355871	3.07152	33.8033	0.0295829	2.87716	33.5657	0.0297923	3.64257	40.3201	0.0248016	5.08005	55.4096	0.0180474	6.80359	73.2643	0.0136492
						12.1031	2.15655	25.728	0.0388681	2.41512	27.8246	0.0359394	2.32732	27.8218	0.035943	2.43297	28.2315	0.0354214	3.05848	33.6598	0.029709	2.85039	33.2534	0.0300721	3.62986	40.1794	0.0248884	5.07769	55.3839	0.0180558	6.80943	73.3271	0.0136375
						12.1864	2.16798	25.8644	0.0386632	2.40875	27.7512	0.0360344	2.2844	27.3087	0.0366183	2.41297	27.9994	0.035715	3.05728	33.6466	0.0297207	2.81581	32.85	0.0304414	3.60561	39.9109	0.0250558	5.06701	55.2674	0.0180938	6.76465	72.8449	0.0137278
						12.2697	2.13747	25.5004	0.0392151	2.41762	27.8534	0.0359022	2.31799	27.7103	0.0360877	2.40214	27.8738	0.035876	3.04972	33.5634	0.0297943	2.82008	32.8998	0.0303953	3.59771	39.8235	0.0251108	5.03511	54.9195	0.0182085	6.78347	73.0476	0.0136897
						12.3531	2.12247	25.3215	0.0394922	2.41459	27.8185	0.0359473	2.29667	27.4554	0.0364227	2.41765	28.0538	0.0356459	3.04153	33.4733	0.0298746	2.82145	32.9158	0.0303806	3.59023	39.7407	0.0251631	5.04806	55.0607	0.0181618	6.74614	72.6456	0.0137655
						12.4364	2.11332	25.2123	0.0396632	2.4037	27.6931	0.0361101	2.29265	27.4074	0.0364866	2.41037	27.9693	0.0357535	3.02662	33.3092	0.0300217	2.82584	32.967	0.0303334	3.56947	39.5109	0.0253095	5.0094	54.639	0.0183019	6.77639	72.9714	0.013704
						12.5197	2.10907	25.1616	0.0397431	2.38468	27.4739	0.0363981	2.26065	27.0248	0.037003	2.36599	27.4543	0.0364242	3.00977	33.1238	0.0301898	2.7955	32.613	0.0306626	3.55085	39.3048	0.0254422	5.0207	54.7623	0.0182607	6.71001	72.2565	0.0138396
						12.6031	2.09953	25.0478	0.0399237	2.39936	27.6431	0.0361754	2.23279	26.6918	0.0374647	2.38852	27.7157	0.0360806	3.02286	33.2678	0.0300591	2.78787	32.524	0.0307465	3.53345	39.1122	0.0255675	4.99568	54.4894	0.0183522	6.64531	71.5598	0.0139743
						12.6864	2.10943	25.1659	0.0397363	2.39729	27.6192	0.0362067	2.24519	26.84	0.0372578	2.37384	27.5454	0.0363037	2.989	32.8952	0.0303996	2.77122	32.3298	0.0309313	3.53632	39.144	0.0255467	4.99941	54.5301	0.0183385	6.72209	72.3866	0.0138147
						12.7697	2.0998	25.051	0.0399186	2.39119	27.5489	0.036299	2.23346	26.6998	0.0374535	2.37429	27.5506	0.0362968	2.98639	32.8664	0.0304262	2.77299	32.3504	0.0309115	3.5331	39.1083	0.02557	4.974	54.2529	0.0184322	6.69866	72.1343	0.013863
						12.8531	2.0657	24.6442	0.0405775	2.37292	27.3384	0.0365785	2.24078	26.7873	0.0373312	2.34191	27.1749	0.0367987	2.97542	32.7457	0.0305383	2.77557	32.3805	0.0308828	3.51737	38.9342	0.0256844	4.94737	53.9625	0.0185314	6.64978	71.608	0.0139649
						12.9364	2.1017	25.0737	0.0398825	2.36239	27.2171	0.0367416	2.20134	26.3158	0.038	2.32695	27.0013	0.0370353	2.9517	32.4847	0.0307838	2.73672	31.9273	0.0313212	3.46273	38.3294	0.0260896	4.95806	54.0791	0.0184914	6.64706	71.5787	0.0139706
						13.0197	2.06986	24.6938	0.040496	2.3766	27.3808	0.0365219	2.22854	26.641	0.0375362	2.34757	27.2406	0.03671	2.9866	32.8688	0.030424	2.74043	31.9706	0.0312788	3.49596	38.6972	0.0258417	4.95121	54.0043	0.018517	6.63606	71.4602	0.0139938
						13.1031	2.07643	24.7722	0.0403678	2.35488	27.1306	0.0368587	2.2024	26.3285	0.0379817	2.33566	27.1024	0.0368972	2.97419	32.7322	0.030551	2.72648	31.8078	0.0314388	3.47072	38.4178	0.0260296	4.93408	53.8175	0.0185813	6.69771	72.1241	0.013865
						13.1864	2.07181	24.7171	0.0404579	2.36013	27.1911	0.0367767	2.22118	26.553	0.0376606	2.31569	26.8706	0.0372153	2.93179	32.2656	0.0309928	2.73539	31.9118	0.0313364	3.47345	38.448	0.0260091	4.88984	53.335	0.0187494	6.6503	71.6136	0.0139638
						13.2697	2.0315	24.2362	0.0412606	2.36225	27.2155	0.0367437	2.18232	26.0884	0.0383312	2.3108	26.8139	0.0372941	2.90786	32.0022	0.0312479	2.73029	31.8523	0.0313949	3.44159	38.0954	0.0262499	4.92534	53.7222	0.0186143	6.60132	71.0861	0.0140674
						13.3531	2.07091	24.7063	0.0404754	2.37317	27.3413	0.0365747	2.19577	26.2492	0.0380964	2.29729	26.6571	0.0375134	2.93699	32.3228	0.0309379	2.70285	31.5321	0.0317137	3.46625	38.3683	0.0260632	4.87362	53.158	0.0188118	6.62222	71.3112	0.014023
						13.4364	2.05476	24.5137	0.0407936	2.35395	27.1199	0.0368733	2.17838	26.0413	0.0384005	2.29758	26.6605	0.0375087	2.89073	31.8137	0.031433	2.71103	31.6276	0.031618	3.42998	37.9669	0.0263388	4.88262	53.2562	0.0187772	6.56613	70.7072	0.0141428
						13.5197	2.03909	24.3267	0.0411071	2.34376	27.0025	0.0370336	2.17565	26.0087	0.0384487	2.27222	26.3662	0.0379273	2.91613	32.0932	0.0311592	2.66761	31.121	0.0321326	3.40212	37.6585	0.0265544	4.85724	52.9794	0.0188753	6.56432	70.6877	0.0141467
						13.6031	2.03295	24.2535	0.0412312	2.34847	27.0568	0.0369593	2.15701	25.7859	0.038781	2.30134	26.7041	0.0374474	2.90931	32.0182	0.0312323	2.68008	31.2665	0.0319831	3.41483	37.7992	0.0264556	4.82835	52.6643	0.0189882	6.5784	70.8393	0.0141165
						13.6864	2.02372	24.1434	0.0414193	2.34272	26.9905	0.0370501	2.1747	25.9973	0.0384655	2.28576	26.5233	0.0377026	2.89313	31.8401	0.031407	2.67721	31.233	0.0320174	3.39999	37.6349	0.0265711	4.85461	52.9507	0.0188855	6.56256	70.6687	0.0141505
						13.7697	2.04145	24.3549	0.0410595	2.33335	26.8826	0.0371988	2.15835	25.8019	0.0387569	2.26147	26.2415	0.0381076	2.86164	31.4935	0.0317526	2.65966	31.0283	0.0322287	3.3651	37.2487	0.0268466	4.8116	52.4816	0.0190543	6.54281	70.4561	0.0141932
						13.8531	2.02026	24.1021	0.0414902	2.30326	26.5359	0.0376848	2.15136	25.7183	0.0388828	2.26477	26.2798	0.0380521	2.87057	31.5918	0.0316538	2.64884	30.902	0.0323603	3.36628	37.2618	0.0268372	4.80831	52.4457	0.0190673	6.49302	69.9199	0.0143021
						13.9364	2.01302	24.0157	0.0416394	2.32126	26.7433	0.0373926	2.14311	25.6197	0.0390325	2.26091	26.235	0.038117	2.85185	31.3858	0.0318616	2.63783	30.7736	0.0324954	3.36862	37.2877	0.0268185	4.80679	52.4291	0.0190734	6.49435	69.9342	0.0142992
						14.0197	1.99968	23.8566	0.0419172	2.33276	26.8758	0.0372082	2.15501	25.7619	0.0388169	2.2666	26.301	0.0380214	2.86191	31.4965	0.0317496	2.62575	30.6327	0.0326449	3.36405	37.2371	0.026855	4.80137	52.37	0.0190949	6.54031	70.4291	0.0141987
						14.1031	2.01021	23.9822	0.0416976	2.3342	26.8924	0.0371853	2.15192	25.725	0.0388727	2.23348	25.9167	0.0385852	2.82883	31.1324	0.0321208	2.62833	30.6628	0.0326128	3.33794	36.9481	0.027065	4.77681	52.1021	0.0191931	6.48803	69.8662	0.0143131
						14.1864	1.9924	23.7697	0.0420704	2.32175	26.7489	0.0373847	2.12999	25.4628	0.0392729	2.24834	26.0891	0.0383301	2.83653	31.2172	0.0320336	2.60069	30.3403	0.0329594	3.35535	37.1408	0.0269246	4.75818	51.8989	0.0192682	6.48865	69.8728	0.0143117
						14.2697	2.01981	24.0967	0.0414994	2.30204	26.5218	0.0377048	2.11309	25.2608	0.039587	2.2141	25.6918	0.0389229	2.8089	30.9131	0.0323487	2.61979	30.5631	0.0327191	3.31563	36.7011	0.0272471	4.7376	51.6744	0.0193519	6.46315	69.5982	0.0143682
						14.3531	2.01583	24.0492	0.0415814	2.32585	26.7962	0.0373188	2.13007	25.4638	0.0392714	2.22409	25.8077	0.0387481	2.81919	31.0263	0.0322307	2.61364	30.4914	0.0327961	3.30364	36.5684	0.027346	4.74102	51.7117	0.019338	6.43601	69.306	0.0144288
						14.4364	1.98097	23.6333	0.0423131	2.28463	26.3213	0.0379921	2.11664	25.3033	0.0395206	2.23538	25.9387	0.0385524	2.80974	30.9223	0.0323391	2.59876	30.3178	0.0329839	3.31168	36.6574	0.0272796	4.71868	51.4681	0.0194295	6.45194	69.4775	0.0143931
						14.5197	1.9712	23.5168	0.0425228	2.29188	26.4048	0.0378719	2.10612	25.1775	0.039718	2.21466	25.6983	0.0389131	2.8054	30.8746	0.0323891	2.60021	30.3347	0.0329655	3.26902	36.1852	0.0276356	4.71773	51.4577	0.0194334	6.43259	69.2692	0.0144364
						14.6031	2.00631	23.9356	0.0417787	2.29561	26.4478	0.0378104	2.10604	25.1765	0.0397195	2.21395	25.6901	0.0389255	2.79149	30.7215	0.0325505	2.59026	30.2186	0.0330922	3.25714	36.0537	0.0277364	4.70741	51.3451	0.019476	6.44129	69.3628	0.0144169
						14.6864	1.97401	23.5503	0.0424623	2.29924	26.4896	0.0377507	2.07828	24.8447	0.0402501	2.19268	25.4433	0.0393031	2.7895	30.6996	0.0325737	2.55778	29.8397	0.0335124	3.24778	35.9501	0.0278164	4.68322	51.0813	0.0195766	6.38123	68.7161	0.0145526
						14.7697	1.96297	23.4186	0.0427011	2.30809	26.5915	0.0376059	2.07009	24.7468	0.0404093	2.20174	25.5484	0.0391414	2.77891	30.583	0.0326979	2.57916	30.0891	0.0332346	3.2519	35.9957	0.0277811	4.65458	50.7689	0.0196971	6.40187	68.9383	0.0145057
						14.8531	1.94864	23.2476	0.0430151	2.31574	26.6797	0.0374817	2.07889	24.852	0.0402383	2.21144	25.6609	0.0389697	2.75802	30.3531	0.0329455	2.5654	29.9286	0.0334128	3.23539	35.8129	0.0279229	4.668	50.9153	0.0196405	6.42661	69.2048	0.0144499
						14.9364	1.95538	23.328	0.0428669	2.2617	26.0571	0.0383773	2.06069	24.6344	0.0405936	2.17952	25.2906	0.0395404	2.78341	30.6326	0.032645	2.57204	30.0061	0.0333266	3.26332	36.1221	0.0276839	4.64213	50.6331	0.0197499	6.37509	68.65	0.0145666
						15.0197	1.96015	23.385	0.0427625	2.28852	26.3661	0.0379275	2.06378	24.6713	0.0405329	2.19013	25.4137	0.0393489	2.73162	30.0626	0.0332639	2.54404	29.6794	0.0336934	3.24184	35.8843	0.0278673	4.6217	50.4103	0.0198372	6.39489	68.8632	0.0145215
						15.1031	1.94605	23.2167	0.0430724	2.28697	26.3482	0.0379532	2.02105	24.1605	0.0413898	2.20431	25.5782	0.0390958	2.75559	30.3264	0.0329746	2.54491	29.6896	0.0336819	3.24833	35.9562	0.0278116	4.63518	50.5573	0.0197795	6.36215	68.5106	0.0145963
						15.1864	1.94855	23.2466	0.0430171	2.29443	26.4342	0.0378298	2.06356	24.6687	0.0405372	2.17853	25.2791	0.0395584	2.74819	30.245	0.0330634	2.52849	29.498	0.0339006	3.21583	35.5964	0.0280927	4.60571	50.2359	0.0199061	6.3747	68.6458	0.0145675
						15.2697	1.93636	23.1011	0.0432879	2.28776	26.3573	0.0379401	2.04537	24.4513	0.0408977	2.1747	25.2346	0.0396281	2.76006	30.3756	0.0329212	2.52297	29.4336	0.0339748	3.2274	35.7245	0.027992	4.60064	50.1806	0.019928	6.36052	68.4931	0.0146
						15.3531	1.94145	23.1619	0.0431744	2.29119	26.3968	0.0378833	2.01005	24.029	0.0416163	2.16207	25.0881	0.0398596	2.74069	30.1624	0.0331538	2.50912	29.272	0.0341623	3.1754	35.1489	0.0284504	4.60781	50.2588	0.019897	6.30171	67.8598	0.0147363
						15.4364	1.94158	23.1634	0.0431715	2.25741	26.0077	0.0384502	2.02692	24.2307	0.04127	2.16506	25.1228	0.0398045	2.73274	30.0749	0.0332503	2.4959	29.1178	0.0343432	3.19173	35.3296	0.0283048	4.54841	49.6109	0.0201569	6.2951	67.7886	0.0147517
						15.5197	1.91736	22.8745	0.0437169	2.27356	26.1937	0.0381771	2.04607	24.4596	0.0408837	2.16354	25.1051	0.0398325	2.73954	30.1498	0.0331678	2.48172	28.9524	0.0345395	3.20114	35.4338	0.0282216	4.55777	49.713	0.0201155	6.28782	67.7102	0.0147688
						15.6031	1.93583	23.0948	0.0432998	2.24545	25.8699	0.038655	2.02857	24.2504	0.0412364	2.16417	25.1124	0.0398209	2.68262	29.5233	0.0338715	2.47492	28.8731	0.0346344	3.18081	35.2088	0.028402	4.55548	49.688	0.0201256	6.28216	67.6493	0.0147821
						15.6864	1.93917	23.1347	0.0432252	2.27051	26.1586	0.0382284	2.01672	24.1088	0.0414787	2.16085	25.0739	0.0398821	2.72678	30.0093	0.033323	2.49096	29.0602	0.0344114	3.14782	34.8436	0.0286997	4.5538	49.6697	0.020133	6.29234	67.7589	0.0147582
						15.7697	1.94877	23.2492	0.0430123	2.25267	25.953	0.0385311	2.01041	24.0333	0.0416089	2.14525	24.8929	0.0401721	2.70709	29.7926	0.0335653	2.46956	28.8105	0.0347095	3.16871	35.0748	0.0285105	4.51929	49.2933	0.0202867	6.25261	67.331	0.014852
						15.8531	1.91175	22.8075	0.0438452	2.2524	25.9499	0.0385357	1.98376	23.7147	0.0421679	2.15822	25.0434	0.0399307	2.70184	29.7349	0.0336306	2.45192	28.6047	0.0349593	3.12404	34.5804	0.0289181	4.51583	49.2555	0.0203023	6.2512	67.3159	0.0148553
						15.9364	1.92877	23.0106	0.0434583	2.27431	26.2024	0.0381645	2.0004	23.9137	0.0418171	2.12054	24.6062	0.0406402	2.71079	29.8334	0.0335195	2.47335	28.8547	0.0346564	3.12354	34.5748	0.0289228	4.50605	49.1488	0.0203464	6.2258	67.0423	0.0149159
						16.0197	1.92183	22.9278	0.0436152	2.25651	25.9973	0.0384656	1.99916	23.8988	0.041843	2.10782	24.4586	0.0408855	2.66838	29.3666	0.0340523	2.45019	28.5845	0.0349839	3.1172	34.5047	0.0289816	4.50774	49.1673	0.0203387	6.20304	66.7973	0.0149707
						16.1031	1.90852	22.769	0.0439194	2.23378	25.7354	0.038857	1.98216	23.6956	0.0422019	2.13058	24.7227	0.0404487	2.68727	29.5745	0.0338129	2.46877	28.8013	0.0347207	3.10803	34.4032	0.0290671	4.49047	48.9789	0.0204169	6.19815	66.7446	0.0149825
						16.1864	1.92048	22.9117	0.0436459	2.22853	25.6749	0.0389485	1.98296	23.7052	0.0421849	2.12795	24.6922	0.0404987	2.66934	29.3772	0.03404	2.42504	28.2911	0.0353468	3.1092	34.4161	0.0290562	4.46628	48.7151	0.0205275	6.19673	66.7293	0.0149859
						16.2697	1.88057	22.4355	0.0445721	2.22557	25.6408	0.0390003	1.96185	23.4528	0.0426388	2.11076	24.4927	0.0408285	2.65843	29.2571	0.0341797	2.43615	28.4208	0.0351856	3.08682	34.1684	0.0292668	4.48013	48.8661	0.0204641	6.13541	66.069	0.0151357
						16.3531	1.89242	22.5769	0.044293	2.23827	25.7871	0.038779	1.98948	23.7831	0.0420466	2.11344	24.5238	0.0407767	2.64002	29.0545	0.0344181	2.4166	28.1927	0.0354702	3.12374	34.5771	0.0289209	4.43935	48.4213	0.0206521	6.12857	65.9953	0.0151526
						16.4364	1.90096	22.6788	0.044094	2.24019	25.8093	0.0387458	1.9612	23.4451	0.0426529	2.12028	24.6032	0.0406452	2.64793	29.1416	0.0343153	2.41448	28.1679	0.0355014	3.07868	34.0783	0.0293442	4.42995	48.3188	0.0206959	6.16597	66.3981	0.0150607
						16.5197	1.88889	22.5348	0.0443758	2.24747	25.8931	0.0386203	1.93809	23.1688	0.0431615	2.11945	24.5935	0.0406611	2.64045	29.0592	0.0344125	2.42904	28.3378	0.0352886	3.07417	34.0284	0.0293872	4.42904	48.3089	0.0207001	6.11009	65.7963	0.0151984
						16.6031	1.87897	22.4165	0.0446101	2.24379	25.8507	0.0386836	1.93522	23.1345	0.0432255	2.10932	24.476	0.0408564	2.64221	29.0786	0.0343895	2.39662	27.9596	0.0357659	3.05693	33.8375	0.029553	4.44373	48.4691	0.0206317	6.12676	65.9758	0.0151571
						16.6864	1.87749	22.3988	0.0446452	2.2196	25.572	0.0391052	1.95252	23.3413	0.0428425	2.11985	24.5982	0.0406534	2.62652	28.9059	0.034595	2.40604	28.0695	0.0356259	3.05904	33.8609	0.0295326	4.42375	48.2512	0.0207249	6.08585	65.5353	0.015259
						16.7697	1.88139	22.4453	0.0445527	2.21752	25.5481	0.0391419	1.93888	23.1782	0.0431439	2.10249	24.3967	0.0409891	2.61143	28.7399	0.0347949	2.40874	28.101	0.0355859	3.05507	33.8169	0.029571	4.3998	47.9899	0.0208377	6.13968	66.115	0.0151252
						16.8531	1.87562	22.3765	0.0446898	2.23554	25.7557	0.0388264	1.95004	23.3116	0.042897	2.13376	24.7596	0.0403884	2.63989	29.0531	0.0344198	2.37651	27.725	0.0360686	3.03267	33.569	0.0297894	4.41057	48.1074	0.0207868	6.06629	65.3247	0.0153082
						16.9364	1.86227	22.2172	0.0450101	2.21927	25.5682	0.039111	1.91877	22.9378	0.0435961	2.08444	24.1873	0.0413441	2.60861	28.7088	0.0348325	2.38981	27.8801	0.0358678	3.03298	33.5724	0.0297863	4.3789	47.762	0.0209372	6.06267	65.2857	0.0153173
						17.0197	1.88766	22.5201	0.0444047	2.2202	25.579	0.0390946	1.947	23.2753	0.042964	2.09911	24.3575	0.0410551	2.61547	28.7843	0.0347411	2.39853	27.9819	0.0357374	3.01516	33.3752	0.0299624	4.39393	47.9259	0.0208655	6.06751	65.3378	0.0153051
						17.1031	1.85078	22.0801	0.0452896	2.22818	25.6709	0.0389546	1.91093	22.8441	0.043775	2.08411	24.1834	0.0413506	2.62148	28.8505	0.0346615	2.35769	27.5054	0.0363565	3.0357	33.6025	0.0297597	4.36681	47.6301	0.0209951	6.01617	64.7849	0.0154357
						17.1864	1.83952	21.9458	0.0455668	2.21014	25.4631	0.0392726	1.91597	22.9044	0.0436598	2.06625	23.9762	0.041708	2.57516	28.3407	0.035285	2.39156	27.9006	0.0358416	3.01399	33.3622	0.029974	4.33405	47.2728	0.0211538	6.04315	65.0755	0.0153668
						17.2697	1.86776	22.2827	0.0448778	2.19844	25.3283	0.0394816	1.89261	22.6251	0.0441987	2.06177	23.9242	0.0417986	2.57617	28.3518	0.0352711	2.37184	27.6705	0.0361396	3.01405	33.3629	0.0299734	4.37606	47.731	0.0209507	6.05996	65.2565	0.0153241
						17.3531	1.83387	21.8784	0.0457072	2.16992	24.9997	0.0400005	1.9017	22.7338	0.0439874	2.06559	23.9685	0.0417213	2.59704	28.5815	0.0349877	2.36502	27.5909	0.0362438	3.0052	33.2649	0.0300617	4.32637	47.189	0.0211914	6.02692	64.9007	0.0154082
						17.4364	1.84752	22.0413	0.0453695	2.20155	25.3641	0.0394258	1.90898	22.8208	0.0438197	2.05902	23.8923	0.0418545	2.57467	28.3353	0.0352917	2.33797	27.2754	0.0366631	3.0191	33.4188	0.0299233	4.33271	47.2582	0.0211604	5.9961	64.5688	0.0154874
						17.5197	1.84326	21.9904	0.0454743	2.15702	24.8511	0.0402397	1.9053	22.7768	0.0439043	2.03019	23.5578	0.0424488	2.55794	28.1512	0.0355225	2.33953	27.2936	0.0366387	2.97573	32.9387	0.0303594	4.33889	47.3256	0.0211302	5.99445	64.5511	0.0154916
						17.6031	1.85754	22.1608	0.0451247	2.17971	25.1125	0.0398208	1.88625	22.5491	0.0443477	2.05786	23.8788	0.0418781	2.56466	28.2251	0.0354294	2.3335	27.2232	0.0367334	2.98461	33.037	0.0302691	4.29738	46.8728	0.0213343	6.00416	64.6556	0.0154666
						17.6864	1.82922	21.8229	0.0458234	2.14608	24.725	0.0404449	1.87274	22.3876	0.0446677	2.06203	23.9272	0.0417934	2.57263	28.3128	0.0353197	2.33851	27.2817	0.0366547	2.97201	32.8975	0.0303974	4.31329	47.0464	0.0212556	5.99128	64.5169	0.0154998
						17.7697	1.85235	22.0989	0.0452512	2.15096	24.7812	0.0403531	1.87042	22.3598	0.0447231	2.03881	23.6578	0.0422694	2.56714	28.2524	0.0353952	2.31194	26.9717	0.0370759	2.99251	33.1245	0.0301892	4.31629	47.0791	0.0212409	5.95419	64.1175	0.0155964
						17.8531	1.8391	21.9408	0.0455772	2.14229	24.6814	0.0405164	1.87212	22.3802	0.0446824	2.05054	23.7939	0.0420276	2.52915	27.8343	0.0359269	2.3032	26.8697	0.0372166	2.9674	32.8465	0.0304446	4.28099	46.6941	0.021416	5.95154	64.089	0.0156033
						17.9364	1.84184	21.9735	0.0455094	2.13775	24.6291	0.0406025	1.8608	22.2448	0.0449543	2.06118	23.9174	0.0418106	2.52701	27.8108	0.0359573	2.30731	26.9177	0.0371503	2.99086	33.1062	0.0302058	4.29404	46.8364	0.0213509	6.00751	64.6917	0.0154579
						18.0197	1.82577	21.7818	0.0459099	2.13577	24.6062	0.0406401	1.87629	22.43	0.0445831	2.02344	23.4794	0.0425904	2.54733	28.0344	0.0356704	2.30879	26.9349	0.0371265	2.95578	32.7179	0.0305643	4.23234	46.1634	0.0216622	5.92776	63.8329	0.0156659
						18.1031	1.8303	21.8358	0.0457963	2.10456	24.2467	0.0412428	1.84363	22.0396	0.0453729	2.04407	23.7188	0.0421606	2.5454	28.0132	0.0356975	2.31223	26.9751	0.0370713	2.94191	32.5644	0.0307084	4.23711	46.2154	0.0216378	5.97147	64.3036	0.0155512
						18.1864	1.82879	21.8178	0.0458341	2.09466	24.1326	0.0414377	1.84939	22.1084	0.0452316	2.00105	23.2196	0.043067	2.5239	27.7766	0.0360016	2.31368	26.992	0.037048	2.94851	32.6374	0.0306397	4.24644	46.3172	0.0215902	5.93836	63.9471	0.0156379
						18.2697	1.83085	21.8424	0.0457826	2.1194	24.4176	0.040954	1.85535	22.1797	0.0450863	1.97487	22.9159	0.0436379	2.50995	27.623	0.0362017	2.29571	26.7823	0.037338	2.93277	32.4632	0.0308041	4.25517	46.4124	0.021546	5.89997	63.5337	0.0157397
						18.3531	1.82935	21.8245	0.0458201	2.09546	24.1418	0.0414219	1.8401	21.9974	0.04546	1.97928	22.967	0.0435407	2.5277	27.8184	0.0359475	2.31996	27.0652	0.0369477	2.93369	32.4734	0.0307945	4.2052	45.8674	0.021802	5.92043	63.754	0.0156853
						18.4364	1.82357	21.7555	0.0459653	2.09213	24.1035	0.0414878	1.84789	22.0905	0.0452683	1.96741	22.8293	0.0438034	2.51759	27.7071	0.0360918	2.27234	26.5097	0.037722	2.94049	32.5486	0.0307232	4.21203	45.9419	0.0217666	5.90128	63.5478	0.0157362
						18.5197	1.81921	21.7035	0.0460755	2.07691	23.9281	0.0417918	1.83523	21.9392	0.0455806	1.97603	22.9293	0.0436123	2.51952	27.7284	0.0360642	2.30389	26.8778	0.0372055	2.92953	32.4273	0.0308382	4.19447	45.7504	0.0218578	5.90068	63.5413	0.0157378
						18.6031	1.79628	21.43	0.0466637	2.11045	24.3145	0.0411277	1.83152	21.8948	0.0456729	2.00342	23.2471	0.043016	2.51216	27.6474	0.0361698	2.29839	26.8136	0.0372945	2.93185	32.453	0.0308138	4.18329	45.6284	0.0219162	5.89203	63.4482	0.0157609
						18.6864	1.79557	21.4215	0.0466821	2.08396	24.0093	0.0416505	1.83805	21.9729	0.0455107	1.95149	22.6446	0.0441607	2.5101	27.6247	0.0361995	2.28033	26.6029	0.0375899	2.89926	32.0923	0.0311602	4.16878	45.4701	0.0219925	5.86028	63.1063	0.0158463
						18.7697	1.81252	21.6237	0.0462456	2.08882	24.0653	0.0415536	1.83533	21.9403	0.0455781	1.96292	22.7772	0.0439036	2.50563	27.5755	0.0362641	2.28033	26.6029	0.0375899	2.90576	32.1642	0.0310905	4.18758	45.6752	0.0218937	5.86715	63.1802	0.0158277
						18.8531	1.78596	21.3068	0.0469333	2.07537	23.9104	0.0418229	1.8387	21.9806	0.0454946	1.96163	22.7622	0.0439324	2.49998	27.5133	0.0363461	2.26982	26.4803	0.0377639	2.90953	32.2059	0.0310502	4.18789	45.6786	0.0218921	5.88255	63.3461	0.0157863
						18.9364	1.80046	21.4798	0.0465553	2.09671	24.1562	0.0413972	1.83382	21.9223	0.0456157	1.96471	22.798	0.0438636	2.50946	27.6176	0.0362087	2.26325	26.4037	0.0378735	2.90221	32.1249	0.0311285	4.14223	45.1806	0.0221334	5.80851	62.5488	0.0159875
						19.0197	1.79212	21.3803	0.046772	2.08019	23.9659	0.0417259	1.83267	21.9086	0.0456443	1.95284	22.6602	0.0441302	2.48068	27.3009	0.0366288	2.26385	26.4107	0.0378635	2.86584	31.7223	0.0315235	4.16229	45.3994	0.0220267	5.83609	62.8458	0.015912
						19.1031	1.77877	21.2211	0.047123	2.07427	23.8977	0.041845	1.80775	21.6106	0.0462735	1.9786	22.9591	0.0435556	2.49014	27.405	0.0364897	2.25859	26.3493	0.0379517	2.88099	31.89	0.0313578	4.12235	44.9637	0.0222402	5.83401	62.8234	0.0159176
						19.1864	1.79486	21.413	0.0467006	2.06883	23.835	0.0419551	1.82818	21.8549	0.0457564	1.96116	22.7568	0.043943	2.47809	27.2724	0.0366671	2.23699	26.0973	0.0383181	2.85013	31.5484	0.0316973	4.12781	45.0233	0.0222107	5.82663	62.7439	0.0159378
						19.2697	1.79392	21.4018	0.046725	2.06585	23.8007	0.0420156	1.791	21.4104	0.0467063	1.95568	22.6932	0.0440661	2.47687	27.259	0.0366852	2.2369	26.0962	0.0383197	2.89706	32.0679	0.0311838	4.13384	45.089	0.0221783	5.82941	62.7738	0.0159302
						19.3531	1.77202	21.1405	0.0473025	2.08408	24.0107	0.0416481	1.80693	21.6008	0.0462945	1.96242	22.7714	0.0439148	2.48664	27.3665	0.036541	2.27839	26.5803	0.0376219	2.86734	31.7389	0.031507	4.10831	44.8106	0.0223162	5.78074	62.2497	0.0160643
						19.4364	1.79151	21.373	0.0467879	2.08154	23.9815	0.0416989	1.8005	21.524	0.0464598	1.96511	22.8026	0.0438546	2.46934	27.1761	0.036797	2.23603	26.0861	0.0383346	2.86786	31.7447	0.0315013	4.1099	44.8279	0.0223075	5.78414	62.2863	0.0160549
						19.5197	1.78797	21.3308	0.0468805	2.09783	24.1691	0.0413751	1.80445	21.5712	0.0463581	1.97239	22.8871	0.0436928	2.48799	27.3814	0.0365212	2.23197	26.0387	0.0384043	2.8371	31.4042	0.0318429	4.10496	44.774	0.0223344	5.75849	62.0101	0.0161264
						19.6031	1.79261	21.3862	0.0467592	2.09754	24.1658	0.0413808	1.77864	21.2627	0.0470308	1.95681	22.7063	0.0440407	2.49313	27.4379	0.0364459	2.22184	25.9206	0.0385794	2.83449	31.3753	0.0318722	4.09618	44.6783	0.0223822	5.76202	62.0481	0.0161165
						19.6864	1.78302	21.2718	0.0470107	2.08477	24.0187	0.0416343	1.78746	21.3681	0.0467988	1.93732	22.4801	0.0444837	2.46731	27.1538	0.0368273	2.23439	26.067	0.0383627	2.83914	31.4268	0.03182	4.0821	44.5247	0.0224594	5.76304	62.0591	0.0161137
						19.7697	1.78607	21.3081	0.0469304	2.09142	24.0953	0.0415019	1.78861	21.3818	0.0467687	1.93938	22.504	0.0444365	2.45244	26.9901	0.0370506	2.20628	25.739	0.0388515	2.8145	31.154	0.0320986	4.07555	44.4533	0.0224955	5.75894	62.015	0.0161251
						19.8531	1.78319	21.2738	0.0470062	2.10446	24.2455	0.0412447	1.78395	21.3261	0.0468908	1.94636	22.585	0.0442771	2.46917	27.1742	0.0367996	2.23737	26.1017	0.0383116	2.8499	31.5459	0.0316998	4.05554	44.235	0.0226065	5.74556	61.8709	0.0161627
						19.9364	1.77815	21.2137	0.0471394	2.11245	24.3376	0.0410887	1.77503	21.2195	0.0471265	1.94297	22.5457	0.0443544	2.45298	26.9961	0.0370425	2.20367	25.7086	0.0388975	2.82694	31.2917	0.0319573	4.0662	44.3513	0.0225473	5.74452	61.8597	0.0161656
						20.0197	1.75976	20.9943	0.0476321	2.1189	24.4119	0.0409637	1.77802	21.2552	0.0470472	1.95452	22.6797	0.0440923	2.45141	26.9788	0.0370662	2.19512	25.6088	0.039049	2.80702	31.0712	0.0321841	4.06166	44.3018	0.0225725	5.70906	61.4778	0.016266
						20.1031	1.78071	21.2442	0.0470717	2.10413	24.2417	0.0412512	1.75879	21.0254	0.0475616	1.93527	22.4563	0.0445308	2.45246	26.9903	0.0370503	2.21123	25.7968	0.0387645	2.83099	31.3366	0.0319116	4.05123	44.188	0.0226306	5.68991	61.2716	0.0163208
						20.1864	1.7878	21.3288	0.046885	2.12969	24.5362	0.0407561	1.75777	21.0132	0.0475892	1.94288	22.5447	0.0443564	2.45562	27.0251	0.0370026	2.17535	25.3782	0.0394039	2.79187	30.9036	0.0323587	4.02568	43.9093	0.0227742	5.73741	61.7831	0.0161856
						20.2697	1.77556	21.1828	0.0472082	2.09858	24.1778	0.0413603	1.7699	21.1582	0.0472631	1.92578	22.3462	0.0447503	2.43676	26.8175	0.037289	2.19603	25.6194	0.0390328	2.78657	30.8449	0.0324203	4.02606	43.9135	0.0227721	5.68605	61.2301	0.0163318
						20.3531	1.76692	21.0797	0.047439	2.09924	24.1854	0.0413473	1.78322	21.3174	0.04691	1.91504	22.2216	0.0450013	2.42499	26.688	0.03747	2.18364	25.4749	0.0392543	2.80964	31.1002	0.0321541	4.02702	43.9239	0.0227666	5.66073	60.9574	0.0164049
						20.4364	1.78252	21.2658	0.0470239	2.09799	24.171	0.0413719	1.75944	21.0331	0.047544	1.92981	22.393	0.0446568	2.42027	26.6361	0.0375431	2.20165	25.685	0.0389332	2.80046	30.9986	0.0322595	4.009	43.7274	0.022869	5.70471	61.431	0.0162784
						20.5197	1.7721	21.1415	0.0473004	2.099	24.1826	0.041352	1.73998	20.8005	0.0480758	1.91836	22.2601	0.0449234	2.41788	26.6098	0.0375802	2.17434	25.3664	0.0394222	2.79764	30.9674	0.032292	3.99791	43.6064	0.0229324	5.63048	60.6317	0.016493
						20.6031	1.76333	21.0369	0.0475356	2.11429	24.3588	0.041053	1.74667	20.8805	0.0478916	1.90221	22.0727	0.0453048	2.44849	26.9466	0.0371104	2.15012	25.0839	0.0398663	2.76254	30.5789	0.0327023	4.00165	43.6472	0.022911	5.64866	60.8274	0.01644
						20.6864	1.76783	21.0905	0.0474146	2.09879	24.1802	0.0413562	1.76293	21.0748	0.0474499	1.92203	22.3027	0.0448376	2.42528	26.6912	0.0374655	2.15402	25.1293	0.0397941	2.77197	30.6833	0.032591	3.97974	43.4082	0.0230371	5.63009	60.6275	0.0164942
						20.7697	1.78047	21.2413	0.047078	2.11075	24.318	0.0411218	1.75414	20.9698	0.0476877	1.91091	22.1737	0.0450985	2.39993	26.4122	0.0378613	2.14466	25.0202	0.0399678	2.76446	30.6001	0.0326796	3.97028	43.305	0.023092	5.6662	61.0163	0.0163891
						20.8531	1.77041	21.1213	0.0473455	2.11502	24.3672	0.0410388	1.72999	20.6811	0.0483534	1.90885	22.1498	0.0451472	2.42535	26.692	0.0374644	2.13564	24.9149	0.0401366	2.76544	30.611	0.032668	3.96927	43.294	0.0230979	5.66416	60.9943	0.016395
						20.9364	1.779	21.2238	0.0471169	2.11115	24.3226	0.041114	1.73558	20.7479	0.0481977	1.89719	22.0145	0.0454247	2.42147	26.6493	0.0375245	2.122	24.7558	0.0403946	2.764	30.5951	0.032685	3.95961	43.1887	0.0231542	5.63691	60.7009	0.0164742
						21.0197	1.76212	21.0224	0.0475683	2.1063	24.2667	0.0412087	1.73975	20.7977	0.0480821	1.88123	21.8293	0.04581	2.43206	26.7658	0.0373611	2.15421	25.1316	0.0397906	2.7591	30.5408	0.0327431	3.93943	42.9686	0.0232728	5.63115	60.6389	0.0164911
						21.1031	1.78245	21.265	0.0470257	2.10735	24.2788	0.0411882	1.72568	20.6295	0.0484742	1.92495	22.3366	0.0447696	2.43677	26.8177	0.0372889	2.13486	24.9058	0.0401513	2.77477	30.7143	0.0325582	3.93455	42.9153	0.0233017	5.61599	60.4756	0.0165356
						21.1864	1.75906	20.9859	0.047651	2.10813	24.2878	0.0411729	1.72375	20.6065	0.0485284	1.93101	22.4069	0.0446291	2.40228	26.4381	0.0378242	2.13965	24.9617	0.0400614	2.77378	30.7033	0.0325698	3.94625	43.0429	0.0232326	5.61533	60.4685	0.0165375
						21.2697	1.77412	21.1656	0.0472465	2.10562	24.2589	0.041222	1.7361	20.7541	0.0481832	1.90349	22.0876	0.0452743	2.3974	26.3844	0.0379012	2.12269	24.7638	0.0403814	2.74673	30.4039	0.0328905	3.9234	42.7937	0.0233679	5.54036	59.6612	0.0167613
						21.3531	1.74354	20.8008	0.0480752	2.10362	24.2358	0.0412612	1.70479	20.3798	0.0490682	1.88774	21.9048	0.045652	2.42386	26.6756	0.0374875	2.11658	24.6926	0.040498	2.75499	30.4953	0.0327919	3.9112	42.6606	0.0234408	5.55948	59.8671	0.0167037
						21.4364	1.74001	20.7586	0.0481727	2.0949	24.1354	0.041433	1.7261	20.6346	0.0484624	1.89958	22.0422	0.0453675	2.39125	26.3167	0.0379987	2.1339	24.8946	0.0401693	2.7335	30.2574	0.0330497	3.90193	42.5595	0.0234965	5.50473	59.2775	0.0168698
						21.5197	1.71293	20.4356	0.0489343	2.09717	24.1615	0.0413881	1.71462	20.4973	0.0487868	1.92278	22.3114	0.0448201	2.40284	26.4442	0.0378154	2.10749	24.5865	0.0406727	2.7478	30.4157	0.0328777	3.92675	42.8302	0.023348	5.58959	60.1913	0.0166137
						21.6031	1.72889	20.626	0.0484826	2.09667	24.1558	0.041398	1.72353	20.6038	0.0485346	1.86191	21.6051	0.0462854	2.38909	26.2929	0.0380331	2.09202	24.406	0.0409735	2.75103	30.4515	0.0328391	3.91745	42.7288	0.0234034	5.536	59.6143	0.0167745
						21.6864	1.72594	20.5908	0.0485654	2.08222	23.9893	0.0416853	1.71847	20.5434	0.0486775	1.90947	22.157	0.0451325	2.38621	26.2612	0.038079	2.0661	24.1037	0.0414875	2.73318	30.2539	0.0330536	3.86832	42.1929	0.0237007	5.54281	59.6876	0.0167539
						21.7697	1.75167	20.8977	0.047852	2.10587	24.2618	0.0412171	1.72592	20.6324	0.0484674	1.88543	21.878	0.045708	2.40391	26.456	0.0377986	2.10569	24.5655	0.0407075	2.73571	30.2819	0.033023	3.87552	42.2715	0.0236566	5.50533	59.284	0.016868
						21.8531	1.72209	20.5449	0.048674	2.13694	24.6197	0.0406178	1.70921	20.4327	0.0489413	1.87815	21.7935	0.0458852	2.39796	26.3905	0.0378924	2.08611	24.3371	0.0410895	2.72466	30.1596	0.0331569	3.87499	42.2657	0.0236599	5.54366	59.6967	0.0167513
						21.9364	1.74933	20.8698	0.0479161	2.08544	24.0264	0.0416209	1.70486	20.3807	0.0490661	1.87892	21.8025	0.0458663	2.38565	26.2551	0.0380879	2.07805	24.2431	0.0412489	2.7297	30.2154	0.0330957	3.86274	42.1321	0.0237349	5.48494	59.0644	0.0169307
						22.0197	1.75209	20.9028	0.0478406	2.08864	24.0633	0.0415571	1.69479	20.2603	0.0493577	1.87687	21.7787	0.0459164	2.38592	26.258	0.0380836	2.08596	24.3353	0.0410925	2.7192	30.0992	0.0332235	3.87103	42.2225	0.0236841	5.53152	59.566	0.0167881
						22.1031	1.74079	20.7679	0.0481511	2.07971	23.9604	0.0417356	1.7172	20.5282	0.0487135	1.87879	21.801	0.0458695	2.37978	26.1905	0.0381818	2.07052	24.1552	0.0413989	2.73517	30.2759	0.0330295	3.86647	42.1728	0.023712	5.48541	59.0695	0.0169292
						22.1864	1.74863	20.8615	0.0479352	2.08925	24.0703	0.041545	1.67407	20.0126	0.0499686	1.88041	21.8198	0.04583	2.43278	26.7737	0.03735	2.05712	23.9989	0.0416686	2.70443	29.9357	0.033405	3.83926	41.876	0.02388	5.47379	58.9443	0.0169652
						22.2697	1.74259	20.7894	0.0481014	2.1039	24.2391	0.0412557	1.68733	20.1711	0.0495759	1.86097	21.5942	0.0463088	2.40629	26.4822	0.0377612	2.06312	24.0689	0.0415474	2.696	29.8424	0.0335094	3.84818	41.9733	0.0238247	5.43548	58.5318	0.0170847
						22.3531	1.71946	20.5135	0.0487484	2.09694	24.1589	0.0413926	1.70439	20.375	0.0490797	1.86321	21.6202	0.0462531	2.40156	26.4302	0.0378356	2.07635	24.2232	0.0412827	2.65854	29.4277	0.0339816	3.84057	41.8903	0.0238719	5.46123	58.8091	0.0170042
						22.4364	1.75344	20.9189	0.0478037	2.09198	24.1017	0.0414908	1.72509	20.6225	0.0484907	1.88951	21.9254	0.0456093	2.39788	26.3897	0.0378936	2.04105	23.8114	0.0419967	2.70358	29.9263	0.0334155	3.85036	41.997	0.0238112	5.46253	58.8231	0.0170001
						22.5197	1.74148	20.7762	0.048132	2.07641	23.9224	0.0418019	1.6838	20.1289	0.0496798	1.84801	21.4438	0.0466335	2.38721	26.2722	0.038063	2.044	23.8458	0.0419361	2.69399	29.8201	0.0335344	3.81966	41.6622	0.0240026	5.48436	59.0582	0.0169325
						22.6031	1.75081	20.8875	0.0478756	2.08933	24.0712	0.0415434	1.70532	20.3862	0.0490529	1.85145	21.4837	0.0465469	2.37218	26.1068	0.0383042	2.06025	24.0354	0.0416053	2.6786	29.6498	0.0337271	3.8149	41.6103	0.0240325	5.44642	58.6496	0.0170504
						22.6864	1.77679	21.1974	0.0471755	2.06399	23.7793	0.0420534	1.70377	20.3676	0.0490975	1.83141	21.2512	0.0470562	2.36483	26.0259	0.0384232	2.05827	24.0123	0.0416453	2.67433	29.6025	0.0337809	3.80981	41.5547	0.0240646	5.43473	58.5237	0.0170871
						22.7697	1.74261	20.7897	0.0481008	2.08077	23.9726	0.0417143	1.72235	20.5897	0.0485679	1.8394	21.3439	0.0468518	2.34666	25.826	0.0387207	2.04305	23.8347	0.0419556	2.66189	29.4648	0.0339388	3.81801	41.6442	0.024013	5.45786	58.7728	0.0170147
						22.8531	1.72716	20.6053	0.0485311	2.08744	24.0494	0.041581	1.72726	20.6484	0.0484298	1.83636	21.3086	0.0469294	2.35093	25.8729	0.0386504	2.03306	23.7182	0.0421617	2.67091	29.5646	0.0338242	3.78094	41.2399	0.0242484	5.47043	58.9082	0.0169756
						22.9364	1.74317	20.7963	0.0480854	2.06647	23.8078	0.042003	1.71995	20.561	0.0486357	1.84198	21.3738	0.0467862	2.34991	25.8617	0.0386672	2.02051	23.5718	0.0424236	2.67869	29.6507	0.033726	3.80012	41.4491	0.024126	5.48473	59.0622	0.0169313
						23.0197	1.75262	20.9091	0.0478261	2.09698	24.1593	0.0413919	1.6879	20.1779	0.0495592	1.82843	21.2166	0.0471329	2.36699	26.0497	0.0383882	2.02635	23.6399	0.0423013	2.66022	29.4463	0.0339601	3.7939	41.3812	0.0241656	5.45499	58.7419	0.0170236
						23.1031	1.74455	20.8128	0.0480473	2.07037	23.8528	0.0419239	1.71801	20.5379	0.0486906	1.85979	21.5805	0.0463381	2.33329	25.6788	0.0389426	2.01579	23.5167	0.0425229	2.67256	29.5829	0.0338033	3.77865	41.2149	0.0242631	5.42844	58.456	0.0171069
						23.1864	1.76434	21.0489	0.0475084	2.07738	23.9335	0.0417824	1.70871	20.4267	0.0489556	1.83766	21.3237	0.0468962	2.33574	25.7058	0.0389018	2.03388	23.7278	0.0421447	2.66167	29.4624	0.0339416	3.796	41.4041	0.0241522	5.40393	58.1921	0.0171845
						23.2697	1.74735	20.8462	0.0479704	2.05558	23.6824	0.0422255	1.72984	20.6793	0.0483576	1.83085	21.2447	0.0470706	2.35548	25.923	0.0385757	2.03734	23.7681	0.0420731	2.66009	29.4449	0.0339618	3.77785	41.2062	0.0242682	5.38014	57.9359	0.0172605
						23.3531	1.78078	21.245	0.0470698	2.08183	23.9848	0.0416931	1.69855	20.3052	0.0492484	1.82128	21.1336	0.0473179	2.36785	26.0592	0.0383742	2.03623	23.7552	0.0420961	2.66361	29.4838	0.0339169	3.76498	41.0658	0.0243512	5.42331	58.4008	0.0171231
						23.4364	1.74613	20.8317	0.0480039	2.05429	23.6675	0.042252	1.72786	20.6556	0.048413	1.84758	21.4388	0.0466444	2.36231	25.9982	0.0384642	1.98872	23.2009	0.0431017	2.62774	29.0868	0.0343799	3.77017	41.1224	0.0243177	5.45511	58.7432	0.0170232
						23.5197	1.74952	20.8721	0.0479109	2.09259	24.1088	0.0414787	1.69986	20.3209	0.0492105	1.81918	21.1093	0.0473726	2.36047	25.9779	0.0384942	2.00388	23.3778	0.0427757	2.61517	28.9476	0.0345451	3.76502	41.0662	0.0243509	5.40607	58.2151	0.0171777
						23.6031	1.75265	20.9094	0.0478253	2.0951	24.1377	0.041429	1.70809	20.4193	0.0489734	1.8246	21.1722	0.0472318	2.34901	25.8518	0.038682	2.00482	23.3887	0.0427556	2.62802	29.0899	0.0343762	3.75392	40.9451	0.0244229	5.36112	57.7311	0.0173217
						23.6864	1.76238	21.0255	0.0475613	2.07558	23.9128	0.0418186	1.71235	20.4702	0.0488515	1.81268	21.0338	0.0475424	2.35767	25.9471	0.0385399	2.01624	23.522	0.0425134	2.64704	29.3004	0.0341292	3.75505	40.9575	0.0244156	5.43667	58.5446	0.017081
						23.7697	1.71445	20.4537	0.0488909	2.0508	23.6273	0.0423239	1.70952	20.4364	0.0489324	1.83215	21.2598	0.0470372	2.35565	25.9249	0.038573	2.00354	23.3738	0.0427829	2.62545	29.0614	0.0344099	3.73288	40.7156	0.0245606	5.3952	58.0981	0.0172123
						23.8531	1.73469	20.6952	0.0483204	2.05747	23.7041	0.0421867	1.70787	20.4166	0.0489797	1.83532	21.2966	0.046956	2.38051	26.1985	0.0381701	1.99694	23.2968	0.0429243	2.61877	28.9875	0.0344976	3.75837	40.9937	0.024394	5.39632	58.1101	0.0172087
						23.9364	1.73364	20.6826	0.0483497	2.08226	23.9898	0.0416845	1.72024	20.5645	0.0486275	1.80602	20.9566	0.0477177	2.38505	26.2485	0.0380975	1.99059	23.2227	0.0430613	2.6154	28.9502	0.0345421	3.73082	40.6932	0.0245741	5.34333	57.5395	0.0173794
						24.0197	1.73679	20.7202	0.048262	2.05009	23.6191	0.0423386	1.72426	20.6126	0.0485141	1.82274	21.1506	0.04728	2.36705	26.0504	0.0383872	1.98811	23.1938	0.043115	2.60088	28.7895	0.0347349	3.77607	41.1867	0.0242797	5.36976	57.8241	0.0172938
						24.1031	1.7514	20.8945	0.0478594	2.06949	23.8426	0.0419417	1.70022	20.3252	0.0492	1.8135	21.0434	0.0475209	2.38244	26.2197	0.0381392	1.96444	22.9177	0.0436345	2.59605	28.736	0.0347996	3.76858	41.105	0.0243279	5.34146	57.5194	0.0173855
						24.1864	1.73572	20.7075	0.0482918	2.05174	23.6381	0.0423045	1.71728	20.5291	0.0487113	1.81679	21.0815	0.0474349	2.36822	26.0632	0.0383682	1.95315	22.7859	0.0438867	2.60591	28.8451	0.0346679	3.73231	40.7094	0.0245643	5.40032	58.1532	0.017196
						24.2697	1.74038	20.7631	0.0481625	2.06548	23.7964	0.0420231	1.69393	20.25	0.0493827	1.80451	20.939	0.0477577	2.34831	25.8441	0.0386935	1.94401	22.6793	0.044093	2.61689	28.9667	0.0345224	3.72942	40.6779	0.0245834	5.36601	57.7837	0.0173059
						24.3531	1.73434	20.691	0.0483302	2.05037	23.6223	0.0423328	1.72371	20.606	0.0485296	1.82685	21.1983	0.0471737	2.35681	25.9377	0.038554	1.945	22.6909	0.0440706	2.59312	28.7036	0.0348389	3.70799	40.4442	0.0247254	5.31435	57.2274	0.0174741
						24.4364	1.73682	20.7206	0.0482612	2.06048	23.7388	0.0421251	1.69989	20.3212	0.0492096	1.81965	21.1147	0.0473603	2.35516	25.9195	0.038581	1.94408	22.6801	0.0440914	2.60082	28.7888	0.0347357	3.70431	40.404	0.02475	5.32041	57.2927	0.0174542
						24.5197	1.73584	20.7089	0.0482884	2.08294	23.9976	0.0416709	1.70294	20.3577	0.0491215	1.80041	20.8915	0.0478664	2.35857	25.957	0.0385252	1.94373	22.6761	0.0440994	2.57036	28.4516	0.0351474	3.69163	40.2657	0.024835	5.32123	57.3015	0.0174515
						24.6031	1.71695	20.4835	0.0488197	2.03245	23.4159	0.042706	1.72077	20.5708	0.0486125	1.79435	20.8211	0.0480281	2.34715	25.8313	0.0387127	1.94459	22.6861	0.0440799	2.59898	28.7684	0.0347603	3.7008	40.3657	0.0247735	5.36622	57.786	0.0173052
						24.6864	1.75509	20.9385	0.0477588	2.03291	23.4212	0.0426964	1.68767	20.1752	0.0495659	1.81566	21.0684	0.0474644	2.3408	25.7615	0.0388177	1.95659	22.8261	0.0438095	2.56879	28.4343	0.0351689	3.70546	40.4166	0.0247423	5.33249	57.4228	0.0174147
						24.7697	1.73668	20.7189	0.0482651	2.01183	23.1783	0.0431438	1.71616	20.5157	0.0487431	1.7964	20.8449	0.0479733	2.35552	25.9235	0.0385751	1.91081	22.292	0.0448591	2.58139	28.5737	0.0349972	3.69988	40.3557	0.0247796	5.31044	57.1853	0.017487
						24.8531	1.73554	20.7053	0.0482968	2.02462	23.3257	0.0428712	1.68105	20.096	0.0497611	1.80597	20.956	0.0477191	2.36037	25.9768	0.0384958	1.90624	22.2387	0.0449667	2.57047	28.4528	0.0351459	3.68711	40.2164	0.0248655	5.32034	57.2919	0.0174545
						24.9364	1.70796	20.3763	0.0490767	2.01043	23.1622	0.0431738	1.69674	20.2836	0.049301	1.80608	20.9573	0.0477162	2.36778	26.0584	0.0383754	1.91985	22.3975	0.0446479	2.55154	28.2433	0.0354066	3.67212	40.0529	0.024967	5.2622	56.6658	0.0176473
						25.0197	1.73343	20.6801	0.0483556	2.03957	23.4979	0.042557	1.6976	20.2939	0.049276	1.80224	20.9127	0.0478178	2.36414	26.0183	0.0384344	1.9131	22.3187	0.0448054	2.57018	28.4496	0.0351498	3.67782	40.1151	0.0249283	5.2957	57.0266	0.0175357
						25.1031	1.71516	20.4622	0.0488707	2.03058	23.3943	0.0427454	1.72548	20.6272	0.0484798	1.79778	20.861	0.0479365	2.34922	25.8541	0.0386785	1.89829	22.1459	0.045155	2.55505	28.2822	0.035358	3.68835	40.2299	0.0248571	5.26611	56.7079	0.0176342
						25.1864	1.70726	20.3679	0.0490968	2.01547	23.2203	0.0430658	1.70553	20.3887	0.0490469	1.78026	20.6577	0.0484082	2.34888	25.8504	0.0386841	1.89634	22.1232	0.0452014	2.56319	28.3723	0.0352457	3.68747	40.2203	0.024863	5.2528	56.5646	0.0176789
						25.2697	1.71084	20.4106	0.0489941	2.02998	23.3874	0.042758	1.69379	20.2483	0.0493868	1.77742	20.6247	0.0484856	2.35552	25.9235	0.0385751	1.87808	21.9102	0.0456409	2.54099	28.1265	0.0355536	3.67353	40.0683	0.0249574	5.21942	56.2052	0.017792
						25.3531	1.71409	20.4494	0.0489012	2.02886	23.3745	0.0427816	1.69567	20.2708	0.0493321	1.79154	20.7885	0.0481034	2.32903	25.6319	0.0390138	1.90258	22.196	0.0450532	2.52891	27.9928	0.0357235	3.68681	40.2132	0.0248675	5.25168	56.5526	0.0176827
						25.4364	1.73257	20.6699	0.0483796	2.01645	23.2316	0.0430449	1.69237	20.2313	0.0494283	1.78393	20.7002	0.0483086	2.33221	25.6669	0.0389606	1.92669	22.4773	0.0444894	2.54028	28.1187	0.0355636	3.66202	39.9428	0.0250358	5.25633	56.6026	0.017667
						25.5197	1.7144	20.4531	0.0488923	2.01794	23.2487	0.0430131	1.71123	20.4568	0.0488835	1.78916	20.7609	0.0481674	2.34991	25.8617	0.0386672	1.87185	21.8375	0.0457928	2.52255	27.9224	0.0358135	3.69223	40.2723	0.024831	5.27321	56.7844	0.0176105
						25.6031	1.72226	20.5469	0.0486692	2.03312	23.4236	0.042692	1.69499	20.2627	0.0493519	1.77695	20.6192	0.0484984	2.30205	25.335	0.0394711	1.8906	22.0562	0.0453387	2.55498	28.2814	0.0353589	3.65776	39.8963	0.025065	5.2291	56.3094	0.017759
						25.6864	1.7066	20.3601	0.0491158	2.02615	23.3433	0.0428388	1.71533	20.5058	0.0487667	1.77095	20.5496	0.0486627	2.36228	25.9979	0.0384647	1.93979	22.6301	0.044189	2.51719	27.8631	0.0358898	3.63804	39.6812	0.0252008	5.23952	56.4216	0.0177237
						25.7697	1.71229	20.4279	0.0489526	2.02643	23.3465	0.0428329	1.69299	20.2388	0.0494102	1.7704	20.5432	0.0486778	2.3236	25.5722	0.039105	1.9631	22.902	0.0436643	2.50618	27.7412	0.0360475	3.65835	39.9027	0.0250609	5.2196	56.2071	0.0177913
						25.8531	1.7165	20.4782	0.0488325	2.02464	23.3259	0.0428708	1.67976	20.0806	0.0497993	1.80237	20.9142	0.0478144	2.3232	25.5678	0.0391117	1.93986	22.6309	0.0441874	2.50619	27.7413	0.0360473	3.65243	39.8382	0.0251016	5.21434	56.1505	0.0178093
						25.9364	1.7406	20.7657	0.0481564	2.02816	23.3665	0.0427964	1.71411	20.4912	0.0488014	1.75255	20.3361	0.0491736	2.34072	25.7606	0.038819	1.96407	22.9133	0.0436427	2.50312	27.7073	0.0360915	3.65895	39.9093	0.0250568	5.17163	55.6905	0.0179564
						26.0197	1.71694	20.4834	0.04882	2.03738	23.4727	0.0426027	1.71379	20.4874	0.0488105	1.77233	20.5656	0.0486248	2.3493	25.855	0.0386772	1.93542	22.5791	0.0442887	2.49847	27.6559	0.0361587	3.65604	39.8775	0.0250768	5.19662	55.9596	0.01787
						26.1031	1.71659	20.4792	0.0488299	2.02394	23.3178	0.0428856	1.67731	20.0513	0.0498721	1.76716	20.5056	0.0487671	2.32011	25.5338	0.0391638	1.93604	22.5863	0.0442746	2.5013	27.6872	0.0361178	3.61728	39.4548	0.0253455	5.19937	55.9893	0.0178606
						26.1864	1.68885	20.1483	0.049632	2.04404	23.5494	0.0424639	1.68815	20.1809	0.0495518	1.75004	20.307	0.0492441	2.32357	25.5718	0.0391055	1.91333	22.3214	0.0448001	2.48181	27.4715	0.0364014	3.662	39.9425	0.025036	5.20343	56.033	0.0178466
						26.2697	1.68327	20.0817	0.0497965	2.00727	23.1258	0.0432418	1.72097	20.5732	0.0486068	1.76586	20.4906	0.048803	2.35126	25.8766	0.038645	1.90811	22.2605	0.0449226	2.49865	27.6579	0.0361561	3.62559	39.5454	0.0252874	5.21736	56.183	0.017799
						26.3531	1.70736	20.3691	0.0490939	2.01712	23.2393	0.0430306	1.6846	20.1385	0.0496562	1.74474	20.2455	0.0493937	2.31238	25.4487	0.0392948	1.90657	22.2425	0.0449589	2.48457	27.502	0.036361	3.61681	39.4496	0.0253488	5.1821	55.8033	0.0179201
						26.4364	1.70835	20.3809	0.0490655	2.0263	23.345	0.0428357	1.71703	20.5261	0.0487184	1.75826	20.4024	0.0490139	2.32893	25.6308	0.0390155	1.90321	22.2033	0.0450383	2.47701	27.4183	0.036472	3.61689	39.4505	0.0253482	5.14945	55.4517	0.0180337
						26.5197	1.70077	20.2905	0.0492841	2.01916	23.2628	0.0429871	1.70106	20.3352	0.0491757	1.75143	20.3231	0.049205	2.34612	25.82	0.0387296	1.89196	22.0721	0.0453061	2.4746	27.3916	0.0365075	3.62565	39.5461	0.025287	5.16352	55.6032	0.0179846
						26.6031	1.72765	20.6112	0.0485174	2.01227	23.1834	0.0431343	1.7222	20.5879	0.0485721	1.73002	20.0747	0.049814	2.32539	25.5919	0.0390749	1.86336	21.7384	0.0460015	2.46143	27.2459	0.0367028	3.61582	39.4388	0.0253557	5.19965	55.9923	0.0178596
						26.6864	1.71151	20.4186	0.0489749	2.02371	23.3152	0.0428905	1.67823	20.0623	0.0498447	1.73711	20.157	0.0496107	2.34495	25.8071	0.038749	1.88513	21.9924	0.0454702	2.46756	27.3137	0.0366116	3.59485	39.2101	0.0255036	5.16805	55.652	0.0179688
						26.7697	1.68964	20.1577	0.0496088	2.0246	23.3254	0.0428716	1.69384	20.2489	0.0493854	1.74966	20.3026	0.0492548	2.32025	25.5353	0.0391615	1.87366	21.8586	0.0457486	2.46302	27.2635	0.0366791	3.60777	39.351	0.0254123	5.1456	55.4102	0.0180472
						26.8531	1.6905	20.168	0.0495836	2.02924	23.3789	0.0427736	1.68812	20.1805	0.0495527	1.75861	20.4064	0.0490042	2.355	25.9177	0.0385836	1.89832	22.1463	0.0451543	2.47675	27.4154	0.0364758	3.5715	38.9554	0.0256704	5.16602	55.6301	0.0179759
						26.9364	1.70811	20.3781	0.0490724	2.01815	23.2511	0.0430086	1.66549	19.91	0.050226	1.75779	20.3969	0.049027	2.32666	25.6058	0.0390536	1.85928	21.6908	0.0461024	2.46745	27.3125	0.0366133	3.59302	39.1902	0.0255166	5.11859	55.1194	0.0181424
						27.0197	1.69957	20.2762	0.0493189	2.02859	23.3714	0.0427873	1.69606	20.2755	0.0493207	1.73092	20.0851	0.0497881	2.28546	25.1524	0.0397576	1.88313	21.9691	0.0455185	2.45335	27.1564	0.0368237	3.58731	39.1279	0.0255572	5.10561	54.9796	0.0181886
						27.1031	1.69268	20.194	0.0495197	2.03109	23.4002	0.0427346	1.67138	19.9804	0.050049	1.76241	20.4505	0.0488985	2.33261	25.6713	0.038954	1.86588	21.7678	0.0459393	2.44372	27.0498	0.0369688	3.59232	39.1825	0.0255216	5.18922	55.88	0.0178955
						27.1864	1.6955	20.2276	0.0494373	2.02447	23.324	0.0428744	1.6821	20.1086	0.04973	1.7471	20.2729	0.049327	2.33304	25.6761	0.0389468	1.88724	22.017	0.0454194	2.44107	27.0205	0.0370089	3.57317	38.9736	0.0256584	5.10074	54.9272	0.0182059
						27.2697	1.67819	20.0211	0.0499473	2.03839	23.4843	0.0425816	1.68308	20.1203	0.0497011	1.7177	19.9317	0.0501713	2.3042	25.3587	0.0394343	1.88954	22.0439	0.0453641	2.44505	27.0646	0.0369487	3.5939	39.1998	0.0255104	5.10481	54.971	0.0181914
						27.3531	1.68415	20.0922	0.0497705	2.03178	23.4082	0.0427201	1.67607	20.0365	0.049909	1.75723	20.3904	0.0490426	2.33619	25.7107	0.0388943	1.88599	22.0024	0.0454495	2.44133	27.0234	0.037005	3.56041	38.8345	0.0257503	5.05991	54.4875	0.0183528
						27.4364	1.69749	20.2514	0.0493794	2.04228	23.5291	0.0425005	1.69351	20.245	0.049395	1.71676	19.9208	0.0501987	2.32271	25.5624	0.03912	1.86714	21.7825	0.0459083	2.42072	26.7952	0.0373201	3.5604	38.8344	0.0257504	5.14011	55.3511	0.0180665
						27.5197	1.6933	20.2014	0.0495016	1.99524	22.9872	0.0435025	1.7029	20.3572	0.0491226	1.74011	20.1918	0.0495251	2.32351	25.5712	0.0391065	1.87685	21.8958	0.0456708	2.41615	26.7447	0.0373906	3.57482	38.9916	0.0256465	5.06013	54.4899	0.018352
						27.6031	1.70976	20.3978	0.049025	2.01273	23.1887	0.0431245	1.69556	20.2695	0.0493353	1.74048	20.1961	0.0495146	2.30731	25.3929	0.0393811	1.89723	22.1336	0.0451802	2.45223	27.144	0.0368405	3.57311	38.973	0.0256588	5.06393	54.5308	0.0183383
						27.6864	1.6863	20.1179	0.0497071	2.00639	23.1157	0.0432607	1.69159			1.72848	20.0568	0.0498584	2.30304	25.3459	0.0394541	1.83129	21.3643	0.0468071	2.4317	26.9168	0.0371515	3.57328	38.9748	0.0256576	5.05389	54.4227	0.0183747
						27.7697	1.72312	20.5571	0.0486449	2.01487	23.2133	0.0430787	1.71377			1.71937	19.9511	0.0501225	2.30102	25.3237	0.0394887	1.82126	21.2473	0.0470648	2.39964	26.5619	0.0376479	3.54898	38.7098	0.0258333	5.05839	54.4711	0.0183584
						27.8531	1.71288	20.435	0.0489357	2.04136	23.5185	0.0425196	1.69123			1.73616	20.1459	0.0496378	2.3015	25.329	0.0394805	1.85348	21.6232	0.0462467	2.42493	26.8418	0.0372553	3.54273	38.6416	0.0258788	5.05128	54.3946	0.0183842
						27.9364	1.70584	20.351	0.0491377	1.98624	22.8835	0.0436996	1.67247			1.71022	19.8449	0.0503907	2.2955	25.2629	0.0395837	1.83375	21.393	0.0467443	2.41718	26.7561	0.0373747	3.51425	38.331	0.0260886	5.0968	54.8847	0.01822
						28.0197	1.69429	20.2132	0.0494726	2.02767	23.3608	0.0428067	1.68649			1.72828	20.0545	0.0498641	2.3161	25.4896	0.0392316	1.8347	21.4041	0.0467201	2.43503	26.9536	0.0371007	3.52981	38.5007	0.0259736	5.05443	54.4285	0.0183727
						28.1031	1.69648	20.2393	0.0494088	2.01023	23.1599	0.0431781	1.67816			1.73771	20.1639	0.0495935	2.32153	25.5494	0.0391399	1.84157	21.4842	0.0465458	2.40186	26.5865	0.0376131	3.56154	38.8468	0.0257422	5.02971	54.1623	0.018463
						28.1864	1.68038	20.0472	0.0498822	1.99604	22.9964	0.0434851	1.70131			1.71472	19.8971	0.0502585	2.30345	25.3504	0.0394471	1.8352	21.4099	0.0467073	2.38724	26.4247	0.0378435	3.53901	38.6011	0.025906	5.04192	54.2938	0.0184183
						28.2697	1.69764	20.2532	0.049375	1.99001	22.9269	0.0436168	1.70358			1.70012	19.7277	0.0506901	2.31926	25.5244	0.0391782	1.85271	21.6142	0.0462659	2.42121	26.8007	0.0373125	3.52332	38.4299	0.0260214	5.05266	54.4094	0.0183792
						28.3531	1.66405	19.8524	0.0503717	1.96932	22.6886	0.0440751	1.66319			1.71413	19.8903	0.0502758	2.32527	25.5906	0.0390769	1.81758	21.2044	0.0471601	2.41873	26.7732	0.0373508	3.52568	38.4557	0.026004	5.01885	54.0453	0.018503
						28.4364	1.65043	19.6899	0.0507874	2.00161	23.0606	0.043364	1.69795			1.72512	20.0178	0.0499555	2.30166	25.3307	0.0394778	1.82407	21.2801	0.0469923	2.38528	26.403	0.0378745	3.50447	38.2243	0.0261614	5.04573	54.3348	0.0184044
						28.5197	1.68472	20.099	0.0497537	2.00274	23.0736	0.0433396	1.67983			1.72844	20.0563	0.0498595	2.32644	25.6034	0.0390573	1.81221	21.1417	0.0472999	2.38925	26.4469	0.0378116	3.5156	38.3457	0.0260785	5.04921	54.3723	0.0183917
						28.6031	1.67121	19.9378	0.0501559	1.99927	23.0336	0.0434148	1.71006			1.74055	20.1969	0.0495126	2.29542	25.262	0.0395851	1.80276	21.0315	0.0475478	2.38125	26.3583	0.0379386	3.52962	38.4986	0.0259749	5.01596	54.0142	0.0185136
						28.6864	1.69495	20.2211	0.0494534	1.9653	22.6423	0.0441652	1.68489			1.71937	19.9511	0.0501225	2.28757	25.1756	0.0397209	1.8046	21.0529	0.0474993	2.39379	26.4972	0.0377399	3.5015	38.1919	0.0261835	5.00915	53.9409	0.0185388
						28.7697	1.68218	20.0687	0.0498288	1.98476	22.8665	0.0437322	1.68527			1.7172	19.9259	0.0501859	2.28724	25.172	0.0397267	1.8349	21.4064	0.046715	2.40959	26.672	0.0374924	3.48508	38.0128	0.0263069	4.97234	53.5445	0.0186761
						28.8531	1.66769	19.8958	0.0502617	1.975	22.754	0.0439483	1.68033			1.71873	19.9437	0.0501412	2.29207	25.2252	0.0396429	1.82255	21.2623	0.0470315	2.42367	26.8279	0.0372746	3.50283	38.2064	0.0261736	4.95356	53.3423	0.0187469
						28.9364	1.69167	20.1819	0.0495493	1.984	22.8577	0.0437489	1.66438			1.71138	19.8584	0.0503566	2.29477	25.2549	0.0395963	1.775	20.7076	0.0482914	2.34115	25.9145	0.0385885	3.47516	37.9046	0.026382	4.99667	53.8065	0.0185851
						29.0197	1.66707	19.8885	0.0502804	1.99448	22.9784	0.0435191	1.67552			1.69183	19.6315	0.0509385	2.28988	25.2011	0.0396809	1.79669	20.9606	0.0477085	2.37461	26.2848	0.0380447	3.48623	38.0254	0.0262982	4.99982	53.8404	0.0185734
						29.1031	1.70483	20.3389	0.0491668	1.98905	22.9159	0.0436379	1.61727			1.6797	19.4908	0.0513063	2.27674	25.0565	0.0399099	1.80036	21.0035	0.0476112	2.37349	26.2725	0.0380627	3.48037	37.9614	0.0263425	4.98126	53.6406	0.0186426
						29.1864	1.67449	19.977	0.0500576	2.01799	23.2493	0.0430121	1.64455			1.71255	19.872	0.0503222	2.28628	25.1614	0.0397433	1.82657	21.3092	0.046928	2.36589	26.1883	0.038185	3.46094	37.7495	0.0264904	4.94638	53.2649	0.0187741
						29.2697	1.70034	20.2854	0.0492966	1.98058	22.8183	0.0438245	1.62955			1.72391	20.0038	0.0499905	2.30141	25.328	0.0394821	1.81293	21.1501	0.0472811	2.35295	26.0451	0.038395	3.45051	37.6358	0.0265705	4.95567	53.365	0.0187389
						29.3531	1.66609	19.8768	0.05031	1.99159	22.9451	0.0435822	1.62521			1.72291	19.9922	0.0500196	2.27079	24.991	0.0400144	1.79048	20.8882	0.0478739	2.35809	26.102	0.0383113	3.45798	37.7172	0.0265131	4.92292	53.0123	0.0188635
						29.4364	1.67521	19.9856	0.0500361	1.98744	22.8973	0.0436732	1.62589			1.71858	19.9419	0.0501456	2.26442	24.9209	0.040127	1.79015	20.8843	0.0478827	2.32368	25.7211	0.0388786	3.4658	37.8025	0.0264533	4.95547	53.3628	0.0187396
						29.5197	1.68946	20.1556	0.0496141	2.00149	23.0592	0.0433666	1.64502			1.71144	19.8591	0.0503548	2.27399	25.0262	0.0399581	1.80371	21.0425	0.0475228	2.33967	25.8981	0.0386129	3.45944	37.7332	0.0265019	4.87716	52.5196	0.0190405
						29.6031	1.67536	19.9874	0.0500316	1.98859	22.9106	0.043648	1.63589			1.7186	19.9422	0.050145	2.29235	25.2283	0.0396381	1.80484	21.0557	0.047493	2.35356	26.0518	0.038385	3.45719	37.7086	0.0265191	4.93186	53.1086	0.0188293
						29.6864	1.67678	20.0043	0.0499893	2.00128	23.0568	0.0433712	1.63956			1.7082	19.8215	0.0504503	2.27808	25.0712	0.0398864	1.78981	20.8804	0.0478918	2.34847	25.9955	0.0384682	3.43129	37.4261	0.0267193	4.95777	53.3876	0.0187309
						29.7697	1.66686	19.8859	0.0502868	1.98461	22.8647	0.0437355	1.62023			1.71475	19.8975	0.0502576	2.25112	24.7745	0.0403641	1.8057	21.0658	0.0474704	2.33877	25.8881	0.0386277	3.45455	37.6798	0.0265394	4.89372	52.6979	0.0189761
						29.8531	1.65476	19.7416	0.0506545	1.98172	22.8314	0.0437993	1.65164			1.70877	19.8281	0.0504335	2.26789	24.9591	0.0400656	1.78893	20.8701	0.0479154	2.32283	25.7117	0.0388928	3.4102	37.1961	0.0268846	4.90557	52.8255	0.0189303
						29.9364	1.67036	19.9277	0.0501814	1.9698	22.6941	0.0440643	1.64958			1.69024	19.6131	0.0509864	2.26189	24.893	0.0401719	1.75388	20.4612	0.048873	2.34525	25.9599	0.038521	3.44226	37.5458	0.0266342	4.95592	53.3677	0.0187379
						30.0197	1.66894	19.9108	0.0502241	1.983	22.8462	0.043771	1.64867			1.68714	19.5771	0.0510801	2.28221	25.1167	0.0398142	1.7677	20.6224	0.0484909	2.34236	25.9279	0.0385685	3.4315	37.4284	0.0267177	4.8817	52.5684	0.0190228
						30.1031	1.67532	19.9869	0.0500328	1.97741	22.7818	0.0438947	1.67039			1.70841	19.8239	0.0504441	2.24511	24.7084	0.0404721	1.76129	20.5477	0.0486673	2.32608	25.7477	0.0388385	3.43538	37.4707	0.0266875	4.92713	53.0577	0.0188474
						30.1864	1.6676	19.8948	0.0502645	2.00045	23.0472	0.0433892	1.65756			1.69892	19.7138	0.0507259	2.2873	25.1727	0.0397256	1.79555	20.9473	0.0477387	2.31295	25.6023	0.039059	3.43387	37.4543	0.0266992	4.88035	52.5539	0.0190281
						30.2697	1.65671	19.7649	0.0505949	1.98358	22.8529	0.0437582	1.65769			1.7209	19.9689	0.050078	2.25812	24.8515	0.040239	1.79254	20.9122	0.0478189	2.34108	25.9137	0.0385896	3.38835	36.9578	0.0270579	4.86709	52.4111	0.0190799
						30.3531	1.66567	19.8718	0.0503227	2.00532	23.1033	0.0432838	1.66525			1.70319	19.7634	0.0505987	2.23801	24.6302	0.0406005	1.7765	20.7251	0.0482507	2.34794	25.9896	0.0384769	3.43737	37.4924	0.026672	4.93336	53.1247	0.0188236
						30.4364	1.66556	19.8704	0.050326	1.9917	22.9464	0.0435798	1.66164			1.69051	19.6162	0.0509782	2.26056	24.8784	0.0401955	1.78198	20.789	0.0481023	2.32818	25.7709	0.0388034	3.40683	37.1593	0.0269111	4.89778	52.7416	0.0189604
						30.5197	1.67196	19.9468	0.0501334	1.97571	22.7622	0.0439325	1.64627			1.7148	19.8981	0.0502561	2.26085	24.8816	0.0401904	1.76165	20.5519	0.0486574	2.3283	25.7722	0.0388014	3.40221	37.1089	0.0269477	4.89338	52.6942	0.0189774
						30.6031	1.66254	19.8344	0.0504174	1.9624	22.6088	0.0442305	1.64553			1.70214	19.7512	0.0506299	2.26057	24.8785	0.0401953	1.7756	20.7146	0.0482751	2.31682	25.6452	0.0389937	3.3986	37.0696	0.0269763	4.86799	52.4208	0.0190764
						30.6864	1.65418	19.7347	0.0506722	1.98094	22.8224	0.0438165	1.66422			1.69648	19.6855	0.0507988	2.27789	25.0691	0.0398897	1.76308	20.5685	0.0486179	2.33677	25.866	0.0386608	3.40055	37.0908	0.0269608	4.80018	51.6906	0.0193459
						30.7697	1.66484	19.8618	0.0503478	1.95914	22.5713	0.0443041	1.63877			1.67093	19.389	0.0515756	2.25958	24.8676	0.040213	1.77721	20.7334	0.0482314	2.30504	25.5148	0.039193	3.40171	37.1035	0.0269517	4.79632	51.649	0.0193614
						30.8531	1.66773	19.8963	0.0502605	1.99816	23.0208	0.0434389	1.65162			1.69946	19.7201	0.0507098	2.25313	24.7966	0.0403281	1.76777	20.6233	0.0484889	2.30961	25.5654	0.0391154	3.38044	36.8715	0.0271212	4.8549	52.2798	0.0191278
						30.9364	1.66683	19.8856	0.0502877	2.0077	23.1307	0.0432325	1.67148			1.6933	19.6486	0.0508942	2.26507	24.928	0.0401155	1.7554	20.4789	0.0488306	2.31121	25.5831	0.0390884	3.39507	37.0311	0.0270044	4.82755	51.9853	0.0192362
						31.0197	1.66807	19.9004	0.0502503	1.99812	23.0204	0.0434398	1.64597			1.70747	19.813	0.0504719	2.27576	25.0457	0.0399271	1.78341	20.8057	0.0480637	2.32033	25.684	0.0389347	3.38859	36.9604	0.027056	4.83063	52.0185	0.0192239
						31.1031	1.65856	19.7869	0.0505384	1.9695	22.6906	0.044071	1.66158			1.68556	19.5588	0.0511279	2.25805	24.8508	0.0402402	1.77589	20.718	0.0482672	2.30479	25.512	0.0391972	3.37828	36.8479	0.0271386	4.79198	51.6023	0.019379
						31.1864	1.66395	19.8512	0.0503747	1.96686	22.6602	0.0441302	1.6382			1.67646	19.4532	0.0514055	2.25287	24.7938	0.0403327	1.76565	20.5985	0.0485472	2.30582	25.5234	0.0391797	3.3429	36.462	0.0274258	4.77251	51.3926	0.019458
						31.2697	1.65363	19.7281	0.0506891	1.98492	22.8683	0.0437287	1.65667			1.68108	19.5068	0.0512642	2.27666	25.0556	0.0399113	1.77164	20.6684	0.048383	2.30215	25.4828	0.0392422	3.35419	36.5852	0.0273335	4.74683	51.1161	0.0195633
						31.3531	1.65769	19.7765	0.0505649	1.96924	22.6876	0.0440769	1.64324			1.66653	19.338	0.0517118	2.2637	24.9129	0.0401398	1.7657	20.5991	0.0485458	2.3022	25.4833	0.0392413	3.32599	36.2776	0.0275652	4.78019	51.4753	0.0194268
						31.4364	1.64086	19.5758	0.0510836	1.97661	22.7726	0.0439125	1.63543			1.66632	19.3355	0.0517183	2.25446	24.8113	0.0403043	1.7787	20.7508	0.048191	2.32459	25.7312	0.0388634	3.32799	36.2994	0.0275487	4.71227	50.7439	0.0197068
						31.5197	1.63445	19.4993	0.0512839	1.97495	22.7534	0.0439494	1.64072			1.66009	19.2632	0.0519124	2.25853	24.856	0.0402317	1.75638	20.4904	0.0488034	2.30061	25.4657	0.0392685	3.33675	36.3949	0.0274763	4.7229	50.8584	0.0196624
						31.6031	1.66019	19.8064	0.0504888	1.96143	22.5977	0.0442524	1.62998			1.65954	19.2569	0.0519296	2.23644	24.6129	0.040629	1.77471	20.7042	0.0482993	2.30819	25.5496	0.0391395	3.3615	36.6649	0.027274	4.75766	51.2327	0.0195188
						31.6864	1.66243	19.8331	0.0504208	1.97858	22.7953	0.0438688	1.65401			1.66	19.2622	0.0519152	2.27577	25.0458	0.0399269	1.78324	20.8037	0.0480683	2.25983	25.0143	0.0399771	3.34601	36.4959	0.0274003	4.74283	51.073	0.0195798
						31.7697	1.63725	19.5327	0.0511962	1.95656	22.5416	0.0443625	1.63355			1.64518	19.0902	0.0523828	2.28075	25.1006	0.0398397	1.76777	20.6233	0.0484889	2.2984	25.4413	0.0393062	3.32933	36.314	0.0275376	4.73132	50.9491	0.0196274
						31.8531	1.63983	19.5635	0.0511157	1.94696	22.431	0.0445812	1.62787			1.64974	19.1431	0.052238	2.21964	24.428	0.0409365	1.75798	20.509	0.048759	2.29575	25.4119	0.0393516	3.33433	36.3685	0.0274963	4.77567	51.4267	0.0194452
						31.9364	1.6685	19.9055	0.0502373	1.93885	22.3375	0.0447677	1.63149			1.6562	19.2181	0.0520343	2.23818	24.6321	0.0405974	1.7566	20.4929	0.0487973	2.26658	25.0891	0.039858	3.29942	35.9878	0.0277872	4.67099	50.2994	0.0198809
						32.0197	1.63149	19.464	0.051377	1.96229	22.6076	0.044233	1.63239			1.66764	19.3508	0.0516773	2.22936	24.535	0.0407581	1.74543	20.3626	0.0491096	2.26974	25.124	0.0398025	3.32263	36.2409	0.0275931	4.70375	50.6522	0.0197425
						32.1031	1.63513	19.5074	0.0512626	1.97946	22.8054	0.0438493	1.64037			1.68575	19.561	0.0511222	2.22859	24.5265	0.0407721	1.76489	20.5897	0.0485681	2.2675	25.0992	0.0398419	3.28951	35.8797	0.0278709	4.73931	51.0351	0.0195944
						32.1864	1.63419	19.4962	0.0512921	1.95352	22.5065	0.0444315	1.62967			1.65622	19.2183	0.0520337	2.22219	24.4561	0.0408896	1.75153	20.4338	0.0489385	2.2805	25.2431	0.0396147	3.31606	36.1693	0.0276478	4.68241	50.4224	0.0198325
						32.2697	1.63976	19.5626	0.0511178	1.96202	22.6045	0.044239	1.62942			1.65246	19.1747	0.0521521	2.24469	24.7037	0.0404797	1.75234	20.4432	0.0489159	2.27667	25.2007	0.0396814	3.30162	36.0118	0.0277687	4.6958	50.5666	0.0197759
						32.3531	1.66334	19.844	0.0503932	1.95273	22.4974	0.0444495	1.61924			1.6507	19.1543	0.0522077	2.22709	24.51	0.0407996	1.7666	20.6096	0.0485211	2.27692	25.2035	0.039677	3.30871	36.0891	0.0277092	4.689	50.4934	0.0198046
						32.4364	1.64817	19.663	0.050857	1.95494	22.5229	0.0443993	1.60358			1.63243	18.9423	0.052792	2.24427	24.6991	0.0404873	1.76144	20.5494	0.0486632	2.27555	25.1883	0.0397009	3.28942	35.8787	0.0278717	4.69185	50.524	0.0197926
						32.5197	1.64394	19.6125	0.0509879	1.94041	22.3555	0.0447317	1.60783			1.64986	19.1445	0.0522343	2.22985	24.5404	0.0407491	1.7489	20.4031	0.0490121	2.28503	25.2933	0.0395362	3.28355	35.8147	0.0279215	4.65008	50.0742	0.0199703
						32.6031	1.66476	19.8609	0.0503502	1.96109	22.5937	0.04426	1.60984			1.68751	19.5814	0.0510689	2.21613	24.3894	0.0410014	1.75069	20.424	0.048962	2.25659	24.9785	0.0400345	3.28923	35.8766	0.0278733	4.68449	50.4448	0.0198237
						32.6864	1.64761	19.6563	0.0508743	1.94167	22.37	0.0447027	1.61881			1.62608	18.8686	0.0529981	2.25135	24.777	0.04036	1.73736	20.2685	0.0493377	2.27042	25.1316	0.0397906	3.2835	35.8141	0.0279219	4.64138	49.9806	0.0200078
						32.7697	1.64002	19.5657	0.0511097	1.97366	22.7386	0.0439781	1.57943			1.64916	19.1364	0.0522564	2.25036	24.7661	0.0403777	1.75691	20.4966	0.0487887	2.25063	24.9125	0.0401405	3.27131	35.6812	0.028026	4.71605	50.7846	0.019691
						32.8531	1.65418	19.7347	0.0506722	1.92545	22.1831	0.0450793	1.61925			1.64992	19.1452	0.0522324	2.24651	24.7238	0.0404469	1.74367	20.3421	0.0491591	2.26877	25.1133	0.0398195	3.28551	35.8361	0.0279049	4.64997	50.0731	0.0199708
						32.9364	1.61393	19.2545	0.051936	1.93384	22.2798	0.0448837	1.59373			1.66497	19.3199	0.0517602	2.25342	24.7998	0.0403229	1.74586	20.3677	0.0490975	2.24976	24.9029	0.040156	3.29704	35.9618	0.0278073	4.68396	50.4391	0.0198259
						33.0197	1.64226	19.5925	0.05104	1.92654	22.1957	0.0450538	1.61587			1.63042	18.919	0.0528571	2.25637	24.8323	0.0402702	1.74305	20.3349	0.0491766	2.26596	25.0822	0.0398689	3.28345	35.8136	0.0279224	4.62816	49.8382	0.0200649
						33.1031	1.64433	19.6172	0.0509758	1.90769	21.9785	0.045499	1.60449			1.64694	19.1106	0.0523269	2.24914	24.7527	0.0403996	1.72388	20.1112	0.0497235	2.26629	25.0858	0.0398631	3.27092	35.6769	0.0280293	4.6249	49.8031	0.0200791
						33.1864	1.63568	19.514	0.0512454	1.90951	21.9995	0.0454556	1.60937			1.64733	19.1152	0.0523145	2.23974	24.6493	0.0405692	1.72828	20.1626	0.0495969	2.22937	24.6772	0.0405233	3.26257	35.5858	0.0281011	4.6499	50.0723	0.0199711
						33.2697	1.63548	19.5116	0.0512516	1.94376	22.3941	0.0446546	1.60173			1.65328	19.1842	0.0521262	2.28015	25.094	0.0398502	1.74173	20.3195	0.0492139	2.20512	24.4087	0.0409689	3.25395	35.4918	0.0281755	4.64624	50.0329	0.0199868
						33.3531	1.62685	19.4086	0.0515235	1.95209	22.4901	0.0444641	1.5893			1.63698	18.9951	0.0526452	2.23795	24.6296	0.0406016	1.72657	20.1426	0.049646	2.23693	24.7609	0.0403863	3.26833	35.6487	0.0280515	4.60595	49.599	0.0201617
						33.4364	1.65748	19.774	0.0505713	1.93706	22.3169	0.0448091	1.58416			1.61527	18.7432	0.0533528	2.25382	24.8042	0.0403157	1.73458	20.2361	0.0494167	2.23544	24.7444	0.0404133	3.25847	35.5411	0.0281364	4.61465	49.6927	0.0201237
						33.5197	1.64362	19.6087	0.0509978	1.93073	22.244	0.044956	1.61079			1.6023	18.5927	0.0537847	2.24656	24.7243	0.040446	1.71645	20.0245	0.0499387	2.25233	24.9313	0.0401102	3.29582	35.9485	0.0278176	4.60782	49.6192	0.0201535
						33.6031	1.63289	19.4807	0.0513329	1.94322	22.3879	0.044667	1.57314			1.6341	18.9617	0.052738	2.23762	24.6259	0.0406076	1.71574	20.0163	0.0499594	2.2212	24.5867	0.0406723	3.26475	35.6096	0.0280823	4.59857	49.5196	0.020194
						33.6864	1.62786	19.4207	0.0514915	1.97087	22.7064	0.0440404	1.5909			1.61695	18.7626	0.0532974	2.2428	24.6829	0.0405138	1.72251	20.0952	0.049763	2.22052	24.5792	0.0406848	3.24976	35.4461	0.0282118	4.58644	49.3889	0.0202474
						33.7697	1.64018	19.5677	0.0511048	1.93644	22.3098	0.0448234	1.60214			1.62892	18.9015	0.0529057	2.23115	24.5547	0.0407254	1.73284	20.2158	0.0494664	2.21603	24.5295	0.0407672	3.21852	35.1054	0.0284857	4.62344	49.7874	0.0200854
						33.8531	1.63606	19.5185	0.0512335	1.90218	21.915	0.0456307	1.57703			1.63062	18.9213	0.0528506	2.24543	24.7119	0.0404664	1.70852	19.932	0.0501705	2.20092	24.3623	0.0410471	3.23381	35.2721	0.028351	4.57695	49.2868	0.0202894
						33.9364	1.64844	19.6662	0.0508487	1.93981	22.3486	0.0447456	1.58056			1.62883	18.9005	0.0529087	2.23597	24.6078	0.0406376	1.72889	20.1697	0.0495794	2.21142	24.4785	0.0408522	3.24097	35.3502	0.0282884	4.5458	48.9513	0.0204285
						34.0197	1.63727	19.5329	0.0511956	1.91833	22.1011	0.0452466	1.57893			1.62451	18.8504	0.0530494	2.24638	24.7223	0.0404493	1.72652	20.142	0.0496474	2.19996	24.3516	0.041065	3.22408	35.166	0.0284365	4.55169	49.0147	0.020402
						34.1031	1.64082	19.5753	0.0510848	1.92689	22.1997	0.0450456	1.55603			1.65063	19.1535	0.0522099	2.24193	24.6734	0.0405295	1.69867	19.8171	0.0504614	2.20848	24.4459	0.0409066	3.24196	35.361	0.0282797	4.5673	49.1828	0.0203323
						34.1864	1.62822	19.425	0.0514801	1.9413	22.3657	0.0447112	1.55316			1.62229	18.8246	0.0531219	2.22846	24.5251	0.0407745	1.73049	20.1883	0.0495335	2.21431	24.5105	0.0407989	3.21461	35.0627	0.0285203	4.56302	49.1367	0.0203514
						34.2697	1.64022	19.5681	0.0511035	1.93599	22.3046	0.0448339	1.53203			1.6383	19.0104	0.0526028	2.22535	24.4909	0.0408315	1.72376	20.1098	0.0497269	2.20748	24.4349	0.0409251	3.22552	35.1817	0.0284239	4.54116	48.9013	0.0204493
						34.3531	1.63718	19.5319	0.0511984	1.94843	22.4479	0.0445476	1.5627			1.61695	18.7626	0.0532974	2.23411	24.5873	0.0406714	1.72748	20.1532	0.0496199	2.21244	24.4898	0.0408334	3.2142	35.0583	0.028524	4.53939	48.8823	0.0204573
						34.4364	1.63367	19.49	0.0513084	1.92664	22.1969	0.0450514	1.56839			1.61325	18.7197	0.0534196	2.22811	24.5213	0.0407809	1.69217	19.7413	0.0506553	2.20738	24.4338	0.040927	3.21703	35.0891	0.0284989	4.55541	49.0548	0.0203854
						34.5197	1.65558	19.7514	0.0506294	1.93089	22.2458	0.0449523	1.56227			1.60586	18.634	0.0536655	2.23454	24.592	0.0406636	1.70889	19.9363	0.0501596	2.20261	24.381	0.0410156	3.22821	35.2111	0.0284002	4.52093	48.6835	0.0205408
						34.6031	1.64346	19.6068	0.0510028	1.95494	22.5229	0.0443993	1.56509			1.63465	18.968	0.0527203	2.21789	24.4088	0.0409688	1.69107	19.7285	0.0506882	2.20958	24.4581	0.0408862	3.20429	34.9502	0.0286122	4.49975	48.4554	0.0206375
						34.6864	1.61971	19.3234	0.0517506	1.91054	22.0114	0.0454311	1.56346			1.5933	18.4882	0.0540885	2.21102	24.3332	0.0410961	1.72771	20.1559	0.0496132	2.214	24.507	0.0408046	3.22009	35.1225	0.0284718	4.46029	48.0305	0.0208201
						34.7697	1.65183	19.7066	0.0507443	1.93058	22.2422	0.0449595	1.56821			1.61488	18.7386	0.0533657	2.23043	24.5468	0.0407385	1.686	19.6693	0.0508406	2.18358	24.1703	0.0413731	3.19496	34.8484	0.0286957	4.48193	48.2635	0.0207196
						34.8531	1.64901	19.673	0.0508311	1.91251	22.0341	0.0453843	1.56319			1.61977	18.7954	0.0532046	2.23878	24.6387	0.0405866	1.67804	19.5764	0.0510818	2.18565	24.1932	0.0413339	3.2061	34.9699	0.028596	4.51823	48.6544	0.0205531
						34.9364	1.64449	19.6191	0.0509708	1.93431	22.2852	0.0448728	1.52988			1.61449	18.7341	0.0533786	2.20925	24.3137	0.0411291	1.72101	20.0777	0.0498064	2.19026	24.2443	0.0412469	3.199	34.8925	0.0286595	4.49443	48.3981	0.020662
						35.0197	1.6383	19.5452	0.0511634	1.92281	22.1527	0.0451412	1.57454			1.6196	18.7934	0.0532102	2.19028	24.1049	0.0414853	1.6944	19.7673	0.0505886	2.20323	24.3878	0.0410041	3.20606	34.9695	0.0285964	4.47034	48.1387	0.0207733
						35.1031	1.63215	19.4719	0.0513562	1.90047	21.8953	0.0456718	1.53078			1.61883	18.7845	0.0532355	2.21756	24.4052	0.0409749	1.68742	19.6859	0.0507978	2.20788	24.4393	0.0409177	3.2073	34.983	0.0285853	4.45082	47.9285	0.0208644
						35.1864	1.63539	19.5105	0.0512544	1.94317	22.3873	0.0446682	1.55521			1.60031	18.5696	0.0538516	2.24887	24.7497	0.0404045	1.70165	19.8519	0.050373	2.18028	24.1338	0.0414357	3.19104	34.8056	0.028731	4.47106	48.1465	0.02077
						35.2697	1.64935	19.677	0.0508206	1.92892	22.2231	0.0449982	1.53433			1.61635	18.7557	0.0533172	2.22014	24.4336	0.0409273	1.69293	19.7502	0.0506325	2.18363	24.1709	0.0413721	3.17373	34.6168	0.0288877	4.4764	48.204	0.0207452
						35.3531	1.64725	19.652	0.0508854	1.91249	22.0338	0.0453848	1.53988			1.61876	18.7837	0.0532378	2.21982	24.43	0.0409332	1.6737	19.5258	0.0512143	2.19083	24.2506	0.0412362	3.1884	34.7768	0.0287548	4.47603	48.2	0.0207469
						35.4364	1.61645	19.2845	0.051855	1.90946	21.9989	0.0454568	1.55638			1.60414	18.614	0.053723	2.19807	24.1907	0.0413383	1.69885	19.8192	0.0504561	2.16998	24.0198	0.0416324	3.16909	34.5662	0.02893	4.45164	47.9374	0.0208606
						35.5197	1.65737	19.7727	0.0505747	1.92627	22.1926	0.0450601	1.53603			1.62469	18.8525	0.0530435	2.21138	24.3371	0.0410895	1.67921	19.5901	0.0510462	2.16861	24.0046	0.0416587	3.18356	34.7241	0.0287985	4.43725	47.7824	0.0209282
						35.6031	1.63202	19.4703	0.0513603	1.9079	21.9809	0.0454939	1.52972			1.61435	18.7325	0.0533832	2.21172	24.3409	0.0410831	1.68259	19.6295	0.0509437	2.18735	24.212	0.0413018	3.16902	34.5655	0.0289306	4.43971	47.8089	0.0209166
						35.6864	1.66512	19.8652	0.0503393	1.93346	22.2754	0.0448925	1.54773			1.59278	18.4822	0.0541062	2.2016	24.2295	0.041272	1.67062	19.4899	0.0513087	2.18118	24.1437	0.0414186	3.16047	34.4722	0.0290089	4.43088	47.7138	0.0209583
						35.7697	1.65869	19.7885	0.0505345	1.91841	22.102	0.0452447	1.54218			1.60588	18.6342	0.0536648	2.20871	24.3078	0.0411391	1.66118	19.3798	0.0516002	2.16589	23.9745	0.041711	3.17485	34.629	0.0288775	4.44786	47.8966	0.0208783
						35.8531	1.62813	19.4239	0.051483	1.92175	22.1405	0.0451661	1.53696			1.59749	18.5368	0.0539466	2.21829	24.4132	0.0409615	1.68964	19.7118	0.0507311	2.18504	24.1865	0.0413454	3.15427	34.4046	0.0290659	4.44584	47.8749	0.0208878
						35.9364	1.66228	19.8313	0.0504253	1.90931	21.9972	0.0454603	1.55429			1.60544	18.6291	0.0536795	2.18315	24.0265	0.0416208	1.67057	19.4893	0.0513102	2.15247	23.826	0.041971	3.17867	34.6707	0.0288428	4.44195	47.833	0.0209061
						36.0197	1.65707	19.7692	0.0505839	1.93486	22.2916	0.04486	1.55391			1.60943	18.6754	0.0535464	2.20945	24.3159	0.0411253	1.6953	19.7778	0.0505617	2.15876	23.8956	0.0418487	3.14511	34.3047	0.0291506	4.42417	47.6415	0.0209901
						36.1031	1.63362	19.4894	0.05131	1.90645	21.9642	0.0455285	1.52223			1.5913	18.465	0.0541565	2.20749	24.2943	0.0411619	1.66927	19.4741	0.0513502	2.15618	23.867	0.0418988	3.13651	34.2109	0.0292305	4.42261	47.6247	0.0209975
						36.1864	1.64257	19.5962	0.0510304	1.93401	22.2818	0.0448798	1.53051			1.61254	18.7115	0.0534431	2.17528	23.9398	0.0417714	1.66015	19.3677	0.0516323	2.14301	23.7212	0.0421563	3.16595	34.532	0.0289587	4.42847	47.6878	0.0209697
						36.2697	1.63173	19.4668	0.0513694	1.92275	22.152	0.0451426	1.5297			1.61741	18.768	0.0532822	2.18592	24.0569	0.041568	1.66699	19.4475	0.0514204	2.1726	24.0488	0.0415822	3.18787	34.7711	0.0287595	4.39138	47.2884	0.0211468
						36.3531	1.62026	19.33	0.0517331	1.91586	22.0727	0.0453049	1.52004			1.61444	18.7335	0.0533802	2.1776	23.9654	0.0417269	1.67452	19.5354	0.0511892	2.16248	23.9368	0.0417768	3.12609	34.0972	0.0293279	4.41602	47.5538	0.0210288
						36.4364	1.63531	19.5096	0.0512569	1.91906	22.1095	0.0452294	1.51209			1.59681	18.5289	0.0539696	2.19876	24.1983	0.0413253	1.70303	19.868	0.0503322	2.15273	23.8288	0.041966	3.14181	34.2687	0.0291812	4.41014	47.4905	0.0210569
						36.5197	1.6508	19.6943	0.050776	1.90871	21.9903	0.0454746	1.51193			1.62291	18.8318	0.0531017	2.20373	24.253	0.0412321	1.68545	19.6629	0.0508572	2.13991	23.6869	0.0422174	3.14679	34.323	0.029135	4.3875	47.2467	0.0211655
						36.6031	1.64202	19.5896	0.0510475	1.90605	21.9596	0.0455381	1.53663			1.60736	18.6514	0.0536154	2.18958	24.0972	0.0414986	1.6667	19.4441	0.0514294	2.14099	23.6989	0.0421961	3.12374	34.0716	0.02935	4.37205	47.0803	0.0212403
						36.6864	1.64701	19.6491	0.0508928	1.91677	22.0831	0.0452834	1.49675			1.5904	18.4546	0.0541871	2.2021	24.235	0.0412626	1.66357	19.4076	0.0515261	2.14738	23.7696	0.0420705	3.10105	33.8241	0.0295647	4.39991	47.3803	0.0211058
						36.7697	1.63397	19.4936	0.051299	1.91202	22.0284	0.0453959	1.53242			1.61458	18.7351	0.0533756	2.19192	24.123	0.0414543	1.65258	19.2794	0.0518688	2.13825	23.6686	0.0422502	3.13608	34.2062	0.0292345	4.35808	46.9299	0.0213084
						36.8531	1.6035	19.1301	0.0522738	1.91354	22.0459	0.0453599	1.53467			1.59922	18.5569	0.0538883	2.21153	24.3388	0.0410867	1.67258	19.5127	0.0512486	2.12689	23.5428	0.0424758	3.1053	33.8704	0.0295243	4.36294	46.9822	0.0212847
						36.9364	1.64437	19.6176	0.0509745	1.92215	22.1451	0.0451567	1.4783			1.59632	18.5233	0.0539862	2.14554	23.6125	0.0423504	1.67278	19.5151	0.0512424	2.11869	23.452	0.0426402	3.12275	34.0608	0.0293593	4.39474	47.3246	0.0211306
						37.0197	1.62842	19.4274	0.0514738	1.88088	21.6696	0.0461475	1.50821			1.54504	17.9282	0.055778	2.1832	24.027	0.0416198	1.6465	19.2085	0.0520603	2.12025	23.4693	0.0426088	3.13003	34.1402	0.029291	4.32976	46.6249	0.0214478
						37.1031	1.63322	19.4846	0.0513225	1.91577	22.0716	0.0453071	1.50963			1.60062	18.5732	0.0538411	2.17857	23.9761	0.0417083	1.68451	19.6519	0.0508856	2.15006	23.7993	0.0420181	3.12149	34.047	0.0293711	4.35042	46.8474	0.0213459
						37.1864	1.62449	19.3805	0.0515983	1.90848	21.9876	0.0454801	1.53216			1.59435	18.5004	0.0540529	2.17119	23.8948	0.04185	1.65432	19.2997	0.0518142	2.11609	23.4233	0.0426926	3.14099	34.2597	0.0291888	4.40972	47.4859	0.0210589
						37.2697	1.64799	19.6608	0.0508626	1.90253	21.9191	0.0456224	1.49393			1.60141	18.5823	0.0538146	2.16963	23.8777	0.0418801	1.66118	19.3798	0.0516002	2.12955	23.5722	0.0424228	3.1127	33.9512	0.0294541	4.35488	46.8954	0.0213241
						37.3531	1.62992	19.4452	0.0514265	1.9251	22.1791	0.0450875	1.50093			1.58482	18.3898	0.0543779	2.17236	23.9077	0.0418275	1.68761	19.6881	0.0507921	2.12653	23.5388	0.042483	3.13324	34.1752	0.029261	4.31862	46.5049	0.0215031
						37.4364	1.64308	19.6022	0.0510146	1.92351	22.1608	0.0451247	1.52169			1.58058	18.3406	0.0545238	2.19324	24.1375	0.0414293	1.6771	19.5655	0.0511104	2.1145	23.4057	0.0427247	3.10015	33.8143	0.0295733	4.3149	46.4649	0.0215216
						37.5197	1.62799	19.4222	0.0514874	1.93847	22.3331	0.0447765	1.52027			1.5803	18.3374	0.0545334	2.18528	24.0499	0.0415802	1.68719	19.6832	0.0508048	2.12199	23.4886	0.0425739	3.09898	33.8015	0.0295845	4.33803	46.7139	0.0214069
						37.6031	1.62746	19.4159	0.0515042	1.90079	21.899	0.0456641	1.50767			1.61067	18.6898	0.0535052	2.19436	24.1498	0.0414082	1.64759	19.2212	0.0520259	2.12429	23.514	0.0425278	3.13748	34.2214	0.0292214	4.33182	46.6471	0.0214376
						37.6864	1.63637	19.5222	0.0512237	1.9068	21.9683	0.0455202	1.47062			1.59143	18.4665	0.0541521	2.18544	24.0517	0.0415772	1.6667	19.4441	0.0514294	2.11665	23.4295	0.0426813	3.12565	34.0924	0.029332	4.30407	46.3483	0.0215758
						37.7697	1.61417	19.2573	0.0519282	1.9053	21.951	0.045556	1.50204			1.6156	18.747	0.0533419	2.18585	24.0562	0.0415694	1.66361	19.4081	0.0515249	2.11444	23.405	0.0427259	3.08733	33.6744	0.0296961	4.30739	46.384	0.0215592
						37.8531	1.64293	19.6005	0.0510192	1.92736	22.2051	0.0450346	1.49446			1.57564	18.2833	0.0546947	2.15606	23.7283	0.0421437	1.65403	19.2963	0.0518233	2.15212	23.8221	0.0419779	3.10204	33.8349	0.0295553	4.30115	46.3168	0.0215904
						37.9364	1.64834	19.665	0.0508518	1.91322	22.0422	0.0453674	1.49214			1.59141	18.4663	0.0541527	2.17314	23.9163	0.0418125	1.66184	19.3875	0.0515798	2.11614	23.4238	0.0426916	3.10314	33.8469	0.0295448	4.30896	46.4009	0.0215513
						38.0197	1.63945	19.5589	0.0511275	1.90145	21.9066	0.0456483	1.48921			1.58102	18.3457	0.0545086	2.16042	23.7763	0.0420587	1.64469	19.1874	0.0521176	2.11412	23.4015	0.0427324	3.10611	33.8793	0.0295166	4.29523	46.2531	0.0216202
						38.1031	1.62673	19.4072	0.0515273	1.92084	22.13	0.0451875	1.513			1.56936	18.2104	0.0549136	2.15164	23.6797	0.0422303	1.66832	19.463	0.0513794	2.11484	23.4094	0.0427178	3.08679	33.6686	0.0297013	4.28944	46.1907	0.0216494
						38.1864	1.61011	19.2089	0.0520592	1.91094	22.016	0.0454216	1.50863			1.60085	18.5758	0.0538334	2.15713	23.7401	0.0421228	1.63441	19.0674	0.0524454	2.10636	23.3156	0.0428898	3.10621	33.8804	0.0295156	4.28625	46.1564	0.0216655
						38.2697	1.63029	19.4497	0.0514148	1.90873	21.9905	0.0454742	1.49791			1.59796	18.5423	0.0539308	2.17869	23.9774	0.041706	1.67262	19.5132	0.0512473	2.09317	23.1696	0.0431601	3.09282	33.7343	0.0296434	4.2792	46.0804	0.0217012
						38.3531	1.63163	19.4656	0.0513726	1.90761	21.9776	0.0455009	1.48704			1.5882	18.429	0.0542622	2.13018	23.4435	0.0426557	1.67008	19.4836	0.0513253	2.10573	23.3086	0.0429027	3.07774	33.5698	0.0297886	4.27961	46.0849	0.0216991
						38.4364	1.6224	19.3555	0.0516648	1.89954	21.8846	0.0456942	1.48874			1.57218	18.2431	0.0548151	2.16362	23.8115	0.0419965	1.64981	19.2471	0.0519559	2.10881	23.3427	0.04284	3.06623	33.4443	0.0299005	4.25101	45.7769	0.0218451
						38.5197	1.6332	19.4844	0.0513232	1.90679	21.9682	0.0455204	1.4944			1.57727	18.3022	0.0546382	2.15095	23.6721	0.0422438	1.64378	19.1768	0.0521465	2.09725	23.2147	0.0430761	3.07572	33.5478	0.0298082	4.27948	46.0835	0.0216998
						38.6031	1.62395	19.374	0.0516155	1.91148	22.0222	0.0454087	1.4856			1.58965	18.4459	0.0542127	2.1689	23.8696	0.0418942	1.65909	19.3554	0.0516653	2.10147	23.2614	0.0429896	3.09422	33.7496	0.02963	4.31681	46.4854	0.0215121
						38.6864	1.62515	19.3883	0.0515774	1.90218	21.915	0.0456307	1.47869			1.58309	18.3697	0.0544373	2.15314	23.6962	0.0422009	1.65549	19.3134	0.0517776	2.10208	23.2682	0.0429771	3.07709	33.5628	0.0297949	4.26357	45.9121	0.0217807
						38.7697	1.62875	19.4313	0.0514634	1.90533	21.9513	0.0455553	1.47247			1.56739	18.1876	0.0549826	2.15675	23.7359	0.0421302	1.63824	19.1121	0.0523228	2.11201	23.3781	0.0427751	3.05709	33.3446	0.0299899	4.27168	45.9995	0.0217394
						38.8531	1.62667	19.4065	0.0515292	1.91823	22.1	0.045249	1.47992			1.61167	18.7014	0.053472	2.15558	23.723	0.0421531	1.66678	19.4451	0.0514269	2.11558	23.4176	0.0427029	3.06168	33.3947	0.0299449	4.24399	45.7013	0.0218812
						38.9364	1.618	19.303	0.0518053	1.92149	22.1375	0.0451722	1.51208			1.61182	18.7031	0.053467	2.13699	23.5185	0.0425198	1.64948	19.2433	0.0519663	2.08666	23.0975	0.0432947	3.06829	33.4668	0.0298804	4.26717	45.9509	0.0217624
						39.0197	1.64843	19.6661	0.050849	1.90155	21.9078	0.0456459	1.46898			1.59664	18.527	0.0539753	2.16	23.7717	0.0420669	1.62729	18.9844	0.0526749	2.05804	22.7807	0.0438968	3.0607	33.384	0.0299545	4.19961	45.2234	0.0221125
						39.1031	1.62385	19.3728	0.0516187	1.92435	22.1705	0.045105	1.48157			1.59166	18.4692	0.0541442	2.13177	23.461	0.0426239	1.6268	18.9787	0.0526907	2.07688	22.9892	0.0434986	3.07316	33.5199	0.029833	4.20604	45.2926	0.0220787
						39.1864	1.64069	19.5737	0.0510889	1.9159	22.0731	0.045304	1.4651			1.59682	18.5291	0.0539693	2.15124	23.6753	0.0422382	1.64279	19.1652	0.0521779	2.10267	23.2747	0.0429651	3.05737	33.3477	0.0299871	4.22614	45.5091	0.0219736
						39.2697	1.61079	19.217	0.0520372	1.90427	21.9391	0.0455807	1.46214			1.57339	18.2572	0.0547729	2.15329	23.6978	0.0421979	1.66145	19.3829	0.0515919	2.10406	23.2901	0.0429367	3.03647	33.1197	0.0301935	4.23497	45.6041	0.0219278
						39.3531	1.65296	19.7201	0.0507096	1.89315	21.811	0.0458484	1.45922			1.58874	18.4353	0.0542437	2.15393	23.7049	0.0421854	1.63592	19.0851	0.052397	2.06953	22.9079	0.0436531	3.04437	33.2059	0.0301152	4.19077	45.1282	0.0221591
						39.4364	1.61107	19.2204	0.0520282	1.89519	21.8345	0.045799	1.45595			1.57653	18.2936	0.0546639	2.14457	23.6019	0.0423695	1.64404	19.1798	0.0521382	2.07992	23.0229	0.043435	3.01752	32.913	0.0303831	4.20174	45.2463	0.0221012
						39.5197	1.61041	19.2125	0.0520495	1.89528	21.8356	0.0457969	1.46853			1.59476	18.5052	0.054039	2.1296	23.4371	0.0426674	1.64418	19.1814	0.0521338	2.06801	22.8911	0.0436852	3.02408	32.9846	0.0303172	4.23322	45.5853	0.0219369
						39.6031	1.62505	19.3871	0.0515806	1.89123	21.7889	0.0458949	1.4681			1.5883	18.4302	0.0542588	2.13528	23.4996	0.0425539	1.62842	18.9976	0.0526383	2.07615	22.9812	0.0435139	3.05961	33.3721	0.0299652	4.2312	45.5636	0.0219474
						39.6864	1.60671	19.1683	0.0521693	1.91172	22.025	0.045403	1.4711			1.57743	18.3041	0.0546327	2.11769	23.306	0.0429073	1.62135	18.9151	0.0528679	2.07286	22.9447	0.043583	3.02658	33.0118	0.0302922	4.19869	45.2135	0.0221173
						39.7697	1.62933	19.4382	0.0514451	1.92818	22.2146	0.0450155	1.46005			1.57953	18.3284	0.05456	2.13487	23.4951	0.042562	1.60788	18.7579	0.0533108	2.07134	22.9279	0.043615	3.03714	33.127	0.0301869	4.22369	45.4827	0.0219864
						39.8531	1.63151	19.4642	0.0513763	1.88358	21.7008	0.0460813	1.46771			1.59393	18.4955	0.0540671	2.1276	23.4151	0.0427075	1.62479	18.9552	0.0527559	2.08887	23.122	0.0432489	3.05095	33.2776	0.0300502	4.20027	45.2305	0.022109
						39.9364	1.62368	19.3708	0.0516241	1.91439	22.0557	0.0453397	1.451			1.52117	17.6512	0.0566532	2.14239	23.5779	0.0424126	1.64801	19.2261	0.0520126	2.06808	22.8918	0.0436837	3.01461	32.8813	0.0304125	4.20563	45.2882	0.0220808
						40.0197	1.61838	19.3076	0.0517932	1.90669	21.967	0.0455228	1.45976			1.54077	17.8787	0.0559326	2.13789	23.5284	0.0425019	1.61342	18.8226	0.0531277	2.04506	22.637	0.0441754	3.01998	32.9398	0.0303584	4.15055	44.6951	0.0223738
						40.1031	1.60348	19.1298	0.0522744	1.90709	21.9716	0.0455133	1.4509			1.53899	17.858	0.0559972	2.15774	23.7468	0.0421109	1.60317	18.703	0.0534674	2.06168	22.821	0.0438193	3.01767	32.9146	0.0303816	4.16094	44.807	0.022318
						40.1864	1.64948	19.6786	0.0508166	1.89902	21.8786	0.0457067	1.44348			1.51718	17.6049	0.0568022	2.15601	23.7278	0.0421447	1.6305	19.0218	0.0525712	2.06373	22.8437	0.0437758	2.9924	32.639	0.0306382	4.18872	45.1061	0.0221699
						40.2697	1.62161	19.3461	0.05169	1.90285	21.9228	0.0456147	1.46155			1.54914	17.9758	0.0556303	2.10902	23.2106	0.0430837	1.64014	19.1343	0.0522622	2.06679	22.8776	0.043711	3.01303	32.864	0.0304284	4.17031	44.9079	0.0222678
						40.3531	1.62302	19.3629	0.0516451	1.88708	21.7411	0.0459959	1.47424			1.53747	17.8404	0.0560526	2.11707	23.2992	0.0429199	1.59752	18.6371	0.0536565	2.06363	22.8426	0.0437779	3.01468	32.882	0.0304118	4.19141	45.1351	0.0221557
						40.4364	1.62135	19.343	0.0516983	1.9125	22.0339	0.0453845	1.45258			1.53078	17.7628	0.0562976	2.09962	23.1072	0.0432766	1.63948	19.1266	0.0522832	2.05836	22.7842	0.04389	2.99062	32.6196	0.0306564	4.16214	44.8199	0.0223115
						40.5197	1.63209	19.4711	0.0513581	1.89629	21.8472	0.0457725	1.45661			1.532	17.7769	0.0562527	2.10659	23.1839	0.0431334	1.63286	19.0494	0.0524952	2.06408	22.8476	0.0437684	3.01771	32.9151	0.0303812	4.1918	45.1393	0.0221537
						40.6031	1.61609	19.2803	0.0518665	1.9039	21.9349	0.0455895	1.45062			1.56122	18.116	0.0551999	2.11961	23.3272	0.0428685	1.63799	19.1092	0.0523308	2.07127	22.9271	0.0436164	3.01022	32.8334	0.0304568	4.14176	44.6004	0.0224213
						40.6864	1.62685	19.4086	0.0515235	1.90183	21.911	0.0456391	1.46797			1.52776	17.7277	0.0564089	2.10273	23.1414	0.0432126	1.60276	18.6982	0.0534811	2.03378	22.5122	0.0444204	3.0064	32.7917	0.0304955	4.15471	44.7399	0.0223514
						40.7697	1.61854	19.3095	0.051788	1.87709	21.626	0.0462407	1.48767			1.54917	17.9761	0.0556293	2.13362	23.4814	0.042587	1.61864	18.8835	0.0529564	2.0355	22.5312	0.0443829	3.0215	32.9564	0.0303431	4.17884	44.9997	0.0222224
						40.8531	1.61402	19.2556	0.0519331	1.89175	21.7949	0.0458823	1.47067			1.54619	17.9416	0.0557365	2.12405	23.376	0.0427788	1.61173	18.8029	0.0531834	2.05912	22.7927	0.0438738	3.01192	32.8519	0.0304396	4.14286	44.6123	0.0224154
						40.9364	1.60947	19.2013	0.0520799	1.9115	22.0224	0.0454083	1.47526			1.5253	17.6992	0.0564998	2.11094	23.2318	0.0430445	1.61563	18.8484	0.053055	2.06091	22.8125	0.0438357	2.99254	32.6405	0.0306368	4.11841	44.349	0.0225484
						41.0197	1.61637	19.2836	0.0518576	1.90932	21.9973	0.0454601	1.44255			1.55078	17.9948	0.0555715	2.11756	23.3046	0.04291	1.62528	18.9609	0.05274	2.02852	22.4539	0.0445356	2.96253	32.3132	0.0309471	4.11177	44.2775	0.0225848
						41.1031	1.63009	19.4473	0.0514211	1.9126	22.0351	0.0453821	1.45213			1.57982	18.3318	0.05455	2.12404	23.3759	0.042779	1.60063	18.6734	0.0535522	2.05211	22.7151	0.0440237	2.97738	32.4752	0.0307927	4.12911	44.4642	0.02249
						41.1864	1.64358	19.6082	0.050999	1.92877	22.2214	0.0450017	1.43955			1.56161	18.1205	0.0551861	2.11393	23.2647	0.0429836	1.63472	19.0711	0.0524355	2.04942	22.6853	0.0440814	2.95367	32.2166	0.0310399	4.13684	44.5474	0.022448
						41.2697	1.61736	19.2954	0.0518258	1.91013	22.0066	0.0454408	1.46998			1.56386	18.1466	0.0551067	2.10247	23.1385	0.0432179	1.62194	18.922	0.0528486	2.02206	22.3824	0.0446779	2.96051	32.2912	0.0309682	4.137	44.5492	0.0224471
						41.3531	1.63235	19.4742	0.0513499	1.90233	21.9168	0.0456272	1.45059			1.56747	18.1885	0.0549798	2.11798	23.3092	0.0429014	1.60331	18.7046	0.0534627	2.04648	22.6527	0.0441448	2.95833	32.2674	0.030991	4.08261	43.9635	0.0227462
						41.4364	1.61661	19.2865	0.0518499	1.92846	22.2178	0.0450089	1.46217			1.55494	18.0431	0.0554228	2.11466	23.2727	0.0429688	1.62615	18.9711	0.0527118	2.05299	22.7248	0.0440048	2.94774	32.1519	0.0311024	4.11767	44.341	0.0225525
						41.5197	1.64564	19.6328	0.0509352	1.91184	22.0263	0.0454002	1.43677			1.56539	18.1644	0.0550529	2.09112	23.0136	0.0434525	1.59914	18.656	0.0536021	2.04346	22.6193	0.04421	2.95777	32.2613	0.0309969	4.11101	44.2693	0.022589
						41.6031	1.60901	19.1958	0.0520948	1.92942	22.2289	0.0449865	1.46428			1.58158	18.3522	0.0544893	2.11087	23.231	0.0430459	1.60643	18.741	0.0533589	2.0596	22.798	0.0438636	2.97057	32.4009	0.0308633	4.10549	44.2098	0.0226194
						41.6864	1.59294	19.0041	0.0526203	1.94466	22.4045	0.044634	1.44203			1.56685	18.1813	0.0550016	2.09072	23.0092	0.0434608	1.62837	18.997	0.0526399	2.03795	22.5583	0.0443295	2.9306	31.9649	0.0312843	4.10217	44.1741	0.0226377
						41.7697	1.62325	19.3657	0.0516378	1.93793	22.3269	0.044789	1.45557			1.56736	18.1872	0.0549837	2.10485	23.1647	0.0431691	1.61697	18.864	0.0530111	2.04907	22.6814	0.044089	2.94735	32.1476	0.0311065	4.05501	43.6663	0.022901
						41.8531	1.61411	19.2566	0.0519302	1.92686	22.1994	0.0450463	1.46179			1.52833	17.7343	0.0563878	2.1166	23.2941	0.0429294	1.60227	18.6925	0.0534974	2.03764	22.5549	0.0443363	2.96151	32.3021	0.0309578	4.08561	43.9958	0.0227295
						41.9364	1.61142	19.2245	0.0520169	1.92423	22.1691	0.0451079	1.45615			1.58634	18.4075	0.0543258	2.07462	22.832	0.0437981	1.60434	18.7166	0.0534284	2.05027	22.6947	0.0440632	2.91773	31.8246	0.0314223	4.08445	43.9833	0.0227359
						42.0197	1.63787	19.5401	0.0511768	1.91111	22.0179	0.0454175	1.45967			1.56464	18.1557	0.0550793	2.07547	22.8414	0.0437802	1.63656	19.0925	0.0523765	2.02922	22.4617	0.0445203	2.94408	32.112	0.031141	4.05913	43.7106	0.0228777
						42.1031	1.61125	19.2225	0.0520223	1.92006	22.121	0.0452058	1.45533			1.5675	18.1888	0.0549788	2.09467	23.0527	0.0433789	1.60373	18.7095	0.0534487	2.03468	22.5221	0.0444008	2.93173	31.9773	0.0312722	4.10754	44.2319	0.0226081
						42.1864	1.61834	19.3071	0.0517944	1.92722	22.2035	0.0450379	1.46155			1.5584	18.0832	0.0552998	2.12237	23.3576	0.0428127	1.58799	18.5259	0.0539785	2.01996	22.3592	0.0447244	2.92646	31.9198	0.0313285	4.07775	43.9111	0.0227733
						42.2697	1.61751	19.2972	0.051821	1.95238	22.4934	0.0444575	1.46157			1.57263	18.2484	0.0547994	2.0899	23.0002	0.0434779	1.62101	18.9111	0.0528789	2.04968	22.6882	0.0440759	2.94608	32.1338	0.0311199	4.06308	43.7532	0.0228555
						42.3531	1.60201	19.1123	0.0523224	1.90568	21.9554	0.0455469	1.43035			1.56994	18.2172	0.0548933	2.07326	22.8171	0.0438268	1.60508	18.7253	0.0534038	2.06571	22.8656	0.0437338	2.93768	32.0422	0.0312089	4.04494	43.5578	0.022958
						42.4364	1.62477	19.3838	0.0515895	1.9277	22.2091	0.0450267	1.43928			1.57728	18.3023	0.0546379	2.07659	22.8537	0.0437565	1.62877	19.0016	0.052627	2.02724	22.4398	0.0445637	2.90576	31.694	0.0315517	4.04462	43.5544	0.0229598
						42.5197	1.61387	19.2538	0.0519379	1.91326	22.0427	0.0453665	1.48136			1.57485	18.2741	0.0547222	2.07977	22.8887	0.0436896	1.61152	18.8004	0.0531903	2.00849	22.2322	0.0449798	2.9212	31.8624	0.0313849	4.03208	43.4193	0.0230312
						42.6031	1.62179	19.3483	0.0516843	1.96026	22.5842	0.0442788	1.45167			1.58644	18.4086	0.0543224	2.0881	22.9804	0.0435153	1.62239	18.9272	0.052834	2.03727	22.5508	0.0443443	2.91253	31.7678	0.0314784	4.08278	43.9653	0.0227452
						42.6864	1.61183	19.2294	0.0520036	1.95041	22.4707	0.0445024	1.45314			1.56838	18.1991	0.0549479	2.07207	22.804	0.043852	1.59728	18.6343	0.0536645	2.03149	22.4868	0.0444705	2.93534	32.0166	0.0312338	4.04134	43.519	0.0229784
						42.7697	1.63231	19.4738	0.0513512	1.94423	22.3995	0.0446438	1.44267			1.59259	18.48	0.0541126	2.09124	23.015	0.04345	1.58311	18.469	0.0541449	2.06343	22.8404	0.0437821	2.91472	31.7917	0.0314547	4.06695	43.7948	0.0228337
						42.8531	1.61201	19.2316	0.0519978	1.93269	22.2666	0.0449104	1.44386			1.55994	18.1011	0.0552452	2.06896	22.7698	0.0439179	1.60431	18.7163	0.0534294	2.04202	22.6034	0.0442412	2.90547	31.6908	0.0315549	4.01906	43.2791	0.0231058
						42.9364	1.6084	19.1885	0.0521145	1.90934	21.9975	0.0454596	1.45284			1.56787	18.1931	0.0549658	2.09166	23.0196	0.0434413	1.60196	18.6889	0.0535078	2.04463	22.6323	0.0441847	2.8787	31.3989	0.0318483	4.03464	43.4469	0.0230166
						43.0197	1.61621	19.2817	0.0518627	1.94123	22.3649	0.0447128	1.43675			1.5843	18.3838	0.0543958	2.09069	23.0089	0.0434614	1.59408	18.5969	0.0537723	2.02548	22.4203	0.0446025	2.87648	31.3746	0.0318729	3.99699	43.0415	0.0232334
						43.1031	1.61341	19.2483	0.0519527	1.93785	22.326	0.0447908	1.43432			1.5476	17.9579	0.0556857	2.08719	22.9704	0.0435343	1.58579	18.5002	0.0540534	2.03413	22.516	0.0444128	2.90676	31.7049	0.0315409	4.05924	43.7118	0.0228771
						43.1864	1.60171	19.1087	0.0523322	1.95576	22.5323	0.0443806	1.4401			1.55807	18.0794	0.0553115	2.09408	23.0462	0.0433911	1.57937	18.4253	0.0542731	2.02959	22.4658	0.0445121	2.88215	31.4365	0.0318102	4.00641	43.1429	0.0231788
						43.2697	1.60374	19.1329	0.052266	1.92512	22.1793	0.045087	1.41455			1.55717	18.069	0.0553435	2.08387	22.9338	0.0436037	1.61156	18.8009	0.053189	2.04771	22.6664	0.0441183	2.90131	31.6455	0.0316001	4.0199	43.2882	0.023101
						43.3531	1.60738	19.1763	0.0521476	1.94841	22.4477	0.0445481	1.42145			1.54832	17.9663	0.0556598	2.0794	22.8847	0.0436974	1.60667	18.7438	0.0533509	2.03748	22.5531	0.0443398	2.90037	31.6352	0.0316103	3.99612	43.0321	0.0232385
						43.4364	1.62656	19.4052	0.0515327	1.94209	22.3749	0.044693	1.43154			1.54405	17.9167	0.0558137	2.07469	22.8328	0.0437966	1.59886	18.6527	0.0536115	2.04225	22.6059	0.0442362	2.88712	31.4907	0.0317554	4.03695	43.4718	0.0230034
						43.5197	1.63027	19.4494	0.0514154	1.93295	22.2695	0.0449044	1.41977			1.56645	18.1767	0.0550156	2.10728	23.1915	0.0431193	1.58942	18.5426	0.0539299	2.06009	22.8034	0.0438531	2.87127	31.3178	0.0319307	3.99274	42.9957	0.0232581
						43.6031	1.62927	19.4375	0.051447	1.90906	21.9943	0.0454663	1.42433			1.58507	18.3927	0.0543693	2.08038	22.8954	0.0436768	1.6147	18.8375	0.0530856	2.02794	22.4475	0.0445484	2.88613	31.4799	0.0317663	4.0115	43.1977	0.0231494
						43.6864	1.58345	18.8909	0.0529357	1.93433	22.2854	0.0448723	1.45299			1.54777	17.9599	0.0556796	2.08241	22.9178	0.0436343	1.59145	18.5663	0.0538611	2.02318	22.3948	0.0446532	2.89839	31.6136	0.0316319	4.02318	43.3235	0.0230822
						43.7697	1.62928	19.4376	0.0514467	1.92212	22.1448	0.0451574	1.4273			1.55832	18.0823	0.0553026	2.07589	22.846	0.0437713	1.56426	18.2491	0.0547973	2.03743	22.5526	0.0443409	2.84587	31.0408	0.0322157	3.93219	42.3437	0.0236163
						43.8531	1.61093	19.2187	0.0520327	1.92389	22.1652	0.0451158	1.43066			1.5648	18.1575	0.0550736	2.09079	23.01	0.0434594	1.57176	18.3366	0.0545359	2.04283	22.6123	0.0442237	2.84928	31.078	0.0321771	3.95706	42.6115	0.0234679
						43.9364	1.62509	19.3876	0.0515793	1.92494	22.1773	0.0450912	1.43355			1.54052	17.8758	0.0559416	2.08785	22.9776	0.0435206	1.60377	18.71	0.0534474	2.0196	22.3552	0.0447323	2.85169	31.1042	0.03215	3.96031	42.6465	0.0234486
						44.0197	1.60067	19.0963	0.0523662	1.92532	22.1816	0.0450823	1.42908			1.56111	18.1147	0.0552038	2.06065	22.6783	0.044095	1.62433	18.9499	0.0527709	2.06642	22.8735	0.0437188	2.84255	31.0046	0.0322533	3.98869	42.9521	0.0232818
						44.1031	1.63401	19.494	0.0512977	1.91676	22.083	0.0452837	1.44352			1.52291	17.6714	0.0565885	2.07561	22.8429	0.0437772	1.58827	18.5292	0.053969	2.02555	22.4211	0.0446009	2.84247	31.0037	0.0322542	3.94436	42.4747	0.0235434
						44.1864	1.62484	19.3846	0.0515872	1.95498	22.5234	0.0443984	1.43577			1.53667	17.8311	0.0560818	2.07018	22.7832	0.043892	1.5816	18.4514	0.0541966	2.03371	22.5114	0.044422	2.83927	30.9688	0.0322906	3.93536	42.3778	0.0235973
						44.2697	1.62396	19.3741	0.0516152	1.94233	22.3776	0.0446875	1.42074			1.53965	17.8657	0.0559732	2.07614	22.8488	0.043766	1.6037	18.7092	0.0534497	2.02668	22.4336	0.0445761	2.84207	30.9993	0.0322588	3.9361	42.3858	0.0235928
						44.3531	1.61841	19.3079	0.0517922	1.92784	22.2107	0.0450234	1.40471			1.56197	18.1247	0.0551734	2.07065	22.7884	0.0438821	1.58455	18.4858	0.0540957	2.02903	22.4596	0.0445244	2.84793	31.0632	0.0321924	3.9363	42.3879	0.0235916
						44.4364	1.60888	19.1942	0.052099	1.94097	22.3619	0.0447188	1.41544			1.52827	17.7336	0.05639	2.07181	22.8011	0.0438575	1.60875	18.7681	0.0532819	2.03236	22.4964	0.0444515	2.83543	30.9269	0.0323343	3.92162	42.2298	0.0236799
						44.5197	1.62263	19.3583	0.0516575	1.96137	22.597	0.0442537	1.41498			1.55183	18.007	0.0555339	2.07147	22.7974	0.0438647	1.58509	18.4921	0.0540772	2.03039	22.4746	0.0444946	2.84344	31.0143	0.0322432	3.90701	42.0725	0.0237685
						44.6031	1.63554	19.5123	0.0512497	1.94222	22.3763	0.04469	1.40085			1.559	18.0902	0.0552785	2.06936	22.7742	0.0439094	1.59798	18.6424	0.053641	2.0036	22.1781	0.0450895	2.85683	31.1603	0.0320921	3.95286	42.5663	0.0234928
						44.6864	1.62317	19.3647	0.0516403	1.94823	22.4456	0.0445522	1.42127			1.54299	17.9044	0.0558521	2.08425	22.938	0.0435957	1.57791	18.4083	0.0543233	2.04842	22.6742	0.044103	2.84661	31.0488	0.0322073	3.9644	42.6905	0.0234244
						44.7697	1.61688	19.2897	0.0518412	1.92569	22.1859	0.0450737	1.4315			1.57934	18.3262	0.0545666	2.06382	22.7132	0.0440273	1.59495	18.6071	0.0537429	2.03312	22.5049	0.0444349	2.85622	31.1537	0.032099	3.96943	42.7447	0.0233947
						44.8531	1.61424	19.2582	0.051926	1.93507	22.294	0.0448552	1.42029			1.54023	17.8724	0.0559522	2.07852	22.875	0.0437159	1.61481	18.8388	0.053082	2.03683	22.5459	0.0443539	2.81808	30.7376	0.0325334	3.915	42.1586	0.02372
						44.9364	1.63572	19.5144	0.0512441	1.9537	22.5086	0.0444274	1.40209			1.51079	17.5308	0.0570425	2.0754	22.8406	0.0437816	1.58491	18.49	0.0540834	2.0066	22.2113	0.0450221	2.81288	30.6809	0.0325935	3.9318	42.3395	0.0236186
						45.0197	1.61768	19.2992	0.0518156	1.9534	22.5052	0.0444343	1.41881			1.54995	17.9852	0.0556013	2.07309	22.8152	0.0438304	1.59013	18.5509	0.0539058	2.03478	22.5232	0.0443986	2.83532	30.9257	0.0323356	3.90539	42.0551	0.0237783
						45.1031	1.61584	19.2773	0.0518746	1.94742	22.4363	0.0445707	1.41389			1.539	17.8581	0.0559969	2.0509	22.571	0.0443046	1.60009	18.6671	0.0535703	2.02975	22.4676	0.0445086	2.79426	30.4778	0.0328107	3.93466	42.3703	0.0236015
						45.1864	1.6063	19.1635	0.0521827	1.92376	22.1637	0.0451189	1.41255			1.55735	18.0711	0.0553371	2.08773	22.9763	0.0435231	1.58624	18.5055	0.054038	2.05303	22.7252	0.0440039	2.83998	30.9765	0.0322825	3.941	42.4385	0.0235635
						45.2697	1.62159	19.3459	0.0516906	1.94483	22.4064	0.0446301	1.40534			1.54671	17.9476	0.0557177	2.07332	22.8177	0.0438256	1.60163	18.685	0.0535188	2.02957	22.4656	0.0445126	2.79763	30.5146	0.0327712	3.87932	41.7743	0.0239381
						45.3531	1.60481	19.1457	0.0522311	1.93737	22.3205	0.0448019	1.40095			1.54728	17.9542	0.0556972	2.06643	22.7419	0.0439717	1.59239	18.5772	0.0538293	2.00781	22.2247	0.044995	2.80854	30.6336	0.0326439	3.92539	42.2704	0.0236572
						45.4364	1.6152	19.2696	0.0518951	1.94452	22.4028	0.0446372	1.43243			1.51599	17.5911	0.0568468	2.08808	22.9802	0.0435158	1.58617	18.5047	0.0540404	1.99561	22.0897	0.0452701	2.79127	30.4452	0.0328459	3.89238	41.915	0.0238578
						45.5197	1.60451	19.1421	0.0522409	1.93452	22.2876	0.0448679	1.42553			1.54322	17.9071	0.0558438	2.09236	23.0273	0.0434268	1.5755	18.3802	0.0544064	2.0084	22.2312	0.0449818	2.81781	30.7347	0.0325365	3.90419	42.0422	0.0237857
						45.6031	1.62186	19.3491	0.051682	1.94395	22.3963	0.0446503	1.39799			1.54044	17.8748	0.0559445	2.10339	23.1487	0.043199	1.59342	18.5892	0.0537945	2.01888	22.3472	0.0447483	2.78316	30.3568	0.0329416	3.92171	42.2308	0.0236794
						45.6864	1.5978	19.062	0.0524603	1.94249	22.3795	0.0446838	1.41593			1.55731	18.0706	0.0553385	2.09927	23.1033	0.0432838	1.61774	18.873	0.0529858	2.00021	22.1406	0.045166	2.76363	30.1437	0.0331744	3.90773	42.0803	0.0237641
						45.7697	1.58242	18.8786	0.0529701	1.95751	22.5525	0.044341	1.44094			1.5572	18.0693	0.0553424	2.10401	23.1555	0.0431863	1.58541	18.4958	0.0540663	2.01555	22.3104	0.0448222	2.78638	30.3919	0.0329035	3.85754	41.5398	0.0240733
						45.8531	1.59731	19.0562	0.0524764	1.95173	22.4859	0.0444723	1.41668			1.54253	17.8991	0.0558687	2.10166	23.1296	0.0432346	1.56327	18.2375	0.0548321	2.01729	22.3296	0.0447835	2.8021	30.5634	0.0327189	3.81315	41.0618	0.0243535
						45.9364	1.61223	19.2342	0.0519907	1.94087	22.3608	0.0447211	1.42605			1.52171	17.6575	0.0566331	2.11894	23.3198	0.042882	1.57783	18.4074	0.0543261	2.02608	22.4269	0.0445893	2.79134	30.446	0.032845	3.84097	41.3614	0.0241771
						46.0197	1.59727	19.0557	0.0524777	1.96144	22.5978	0.0442521	1.41871			1.5446	17.9231	0.0557939	2.11001	23.2215	0.0430635	1.57222	18.3419	0.0545199	2.00642	22.2093	0.0450262	2.79273	30.4611	0.0328287	3.86144	41.5818	0.024049
						46.1031	1.59093	18.9801	0.0526868	1.95686	22.545	0.0443557	1.4229			1.51071	17.5299	0.0570455	2.1309	23.4514	0.0426413	1.60118	18.6798	0.0535338	2.01473	22.3013	0.0448405	2.78074	30.3304	0.0329703	3.87899	41.7708	0.0239402
						46.1864	1.58448	18.9031	0.0529013	1.94829	22.4463	0.0445508	1.40818			1.52189	17.6596	0.0566264	2.08085	22.9006	0.043667	1.59938	18.6588	0.0535941	2.03664	22.5438	0.0443581	2.79796	30.5182	0.0327673	3.83224	41.2674	0.0242322
						46.2697	1.59712	19.0539	0.0524826	1.94412	22.3982	0.0446464	1.42773			1.51744	17.608	0.0567925	2.12221	23.3558	0.0428159	1.58643	18.5077	0.0540316	2.00743	22.2205	0.0450035	2.78371	30.3628	0.0329351	3.88476	41.8329	0.0239046
						46.3531	1.60942	19.2007	0.0520815	1.97784	22.7867	0.0438852	1.42271			1.53762	17.8421	0.0560471	2.12543	23.3912	0.0427511	1.58529	18.4944	0.0540704	2.03734	22.5516	0.0443428	2.78195	30.3436	0.0329559	3.83848	41.3346	0.0241928
						46.4364	1.59655	19.0471	0.0525013	1.97726	22.78	0.0438981	1.40308			1.5559	18.0542	0.0553886	2.11865	23.3166	0.0428879	1.55608	18.1536	0.0550854	2.00287	22.17	0.045106	2.77834	30.3042	0.0329987	3.83812	41.3307	0.0241951
						46.5197	1.57717	18.8159	0.0531465	1.95567	22.5313	0.0443827	1.41793			1.53941	17.8629	0.055982	2.14168	23.5701	0.0424267	1.59696	18.6305	0.0536753	2.01043	22.2537	0.0449364	2.78905	30.421	0.032872	3.81718	41.1052	0.0243278
						46.6031	1.62148	19.3446	0.0516941	1.97823	22.7912	0.0438765	1.41835			1.538	17.8465	0.0560333	2.1331	23.4756	0.0425973	1.55562	18.1483	0.0551017	2.01953	22.3544	0.0447339	2.78334	30.3587	0.0329395	3.85743	41.5386	0.024074
						46.6864	1.61796	19.3026	0.0518066	1.96371	22.6239	0.044201	1.42551			1.55002	17.986	0.0555988	2.10802	23.1996	0.0431041	1.60529	18.7277	0.0533968	2.00027	22.1412	0.0451646	2.78675	30.3959	0.0328991	3.83642	41.3124	0.0242058
						46.7697	1.59271	19.0013	0.0526279	1.97749	22.7827	0.043893	1.44748			1.51096	17.5328	0.0570361	2.14183	23.5717	0.0424237	1.5808	18.442	0.054224	2.00446	22.1876	0.0450702	2.78413	30.3673	0.0329301	3.80917	41.0189	0.024379
						46.8531	1.56442	18.6638	0.0535796	1.95758	22.5533	0.0443394	1.43892			1.51621	17.5937	0.0568386	2.12073	23.3395	0.0428458	1.55482	18.1389	0.05513	2.00231	22.1638	0.0451186	2.78335	30.3588	0.0329393	3.8045	40.9686	0.0244089
						46.9364	1.58078	18.859	0.0530251	1.93057	22.2421	0.0449597	1.45541			1.52534	17.6996	0.0564984	2.11691	23.2975	0.0429231	1.57442	18.3676	0.0544437	1.99336	22.0647	0.0453212	2.77763	30.2964	0.0330072	3.80757	41.0017	0.0243892
						47.0197	1.57771	18.8224	0.0531283	1.95	22.466	0.0445117	1.45729			1.52329	17.6758	0.0565744	2.09299	23.0342	0.0434137	1.58929	18.5411	0.0539343	2.0093	22.2412	0.0449616	2.77175	30.2323	0.0330772	3.84745	41.4312	0.0241364
						47.1031	1.59373	19.0135	0.0525942	1.95939	22.5742	0.0442984	1.4301			1.52758	17.7256	0.0564155	2.10355	23.1504	0.0431957	1.58846	18.5314	0.0539625	2.01506	22.3049	0.0448331	2.75886	30.0917	0.0332317	3.82568	41.1967	0.0242738
						47.1864	1.6017	19.1086	0.0523325	1.95612	22.5365	0.0443725	1.4303			1.53916	17.86	0.0559911	2.10452	23.1611	0.0431758	1.56691	18.28	0.0547047	2.01735	22.3303	0.0447822	2.76909	30.2033	0.033109	3.79417	40.8574	0.0244754
						47.2697	1.59581	19.0383	0.0525257	1.9584	22.5628	0.0443208	1.45572			1.5191	17.6272	0.0567304	2.10599	23.1773	0.0431457	1.58206	18.4567	0.0541808	1.99649	22.0994	0.0452501	2.76115	30.1167	0.0332042	3.837	41.3186	0.0242022
						47.3531	1.62326	19.3658	0.0516374	1.93236	22.2628	0.0449181	1.44111			1.5266	17.7143	0.0564517	2.09196	23.0229	0.0434351	1.61141	18.7991	0.053194	1.98942	22.0211	0.0454109	2.74042	29.8906	0.0334553	3.83972	41.3479	0.024185
						47.4364	1.60951	19.2018	0.0520786	1.97447	22.7479	0.0439601	1.44619			1.53973	17.8666	0.0559703	2.08105	22.9028	0.0436628	1.57379	18.3602	0.0544655	1.99262	22.0566	0.045338	2.76865	30.1985	0.0331142	3.81073	41.0357	0.024369
						47.5197	1.59464	19.0243	0.0525642	1.96055	22.5875	0.0442722	1.45686			1.49698	17.3705	0.0575687	2.09659	23.0738	0.0433391	1.56865	18.3003	0.054644	2.00157	22.1556	0.0451353	2.7553	30.0529	0.0332747	3.79249	40.8393	0.0244862
						47.6031	1.59889	19.0751	0.0524245	1.9509	22.4764	0.0444912	1.44172			1.5178	17.6121	0.056779	2.08902	22.9905	0.0434962	1.59372	18.5927	0.0537844	2.00996	22.2485	0.0449469	2.76977	30.2107	0.0331008	3.8115	41.044	0.0243641
						47.6864	1.60051	19.0944	0.0523714	1.96788	22.672	0.0441073	1.46137			1.53991	17.8687	0.0559638	2.09537	23.0604	0.0433644	1.59699	18.6309	0.0536743	2.01412	22.2945	0.044854	2.75492	30.0487	0.0332793	3.81815	41.1156	0.0243216
						47.7697	1.5788	18.8354	0.0530916				1.45772			1.54423	17.9188	0.0558072	2.0891	22.9914	0.0434945	1.60522	18.7269	0.0533991	1.98264	21.9461	0.0455662	2.77461	30.2635	0.0330431	3.77121	40.6102	0.0246244
						47.8531	1.60841	19.1886	0.0521142				1.43819			1.53208	17.7778	0.0562498	2.10268	23.1409	0.0432136	1.57933	18.4249	0.0542745	1.95962	21.6913	0.0461015	2.75736	30.0754	0.0332498	3.7928	40.8427	0.0244842
						47.9364	1.58496	18.9089	0.0528852				1.4436			1.50933	17.5139	0.0570977	2.09649	23.0727	0.0433412	1.57936	18.4252	0.0542734	1.9975	22.1106	0.0452272	2.78352	30.3607	0.0329373	3.84236	41.3763	0.0241684

## Sheet: Sup. Figure 5b NME
								20 mol%			20 mol% 50% eeL			20 mol% 0% eeL			10 mol%			5 mol%
						t(h)	Area	% Benz	(% Benz)-1	Area	% Benz	(% Benz)-1	Area	% Benz	(% Benz)-1	Area	% Benz	(% Benz)-1	Area	% Benz	(% Benz)-1
						0.0197222	7.8233	100	0.01	9.16899	100	0.01	8.8623	100	0.01	8.91184	100	0.01	9.31015	100	0.01
						0.103056	7.57141	96.7803	0.0103327	8.73412	95.2572	0.0104979	8.47541	95.6344	0.0104565	8.76452	98.3469	0.0101681	9.20629	98.8844	0.0101128
						0.186389	7.39921	94.5791	0.0105732	8.43974	92.0466	0.0108641	8.15155	91.9801	0.0108719	8.62137	96.7406	0.0103369	9.06344	97.3501	0.0102722
						0.269722	7.16811	91.6251	0.010914	8.13254	88.6961	0.0112744	7.79792	87.9898	0.011365	8.47483	95.0963	0.0105157	8.91616	95.7682	0.0104419
						0.353056	7.04632	90.0684	0.0111027	7.86954	85.8278	0.0116512	7.52234	84.8802	0.0117813	8.3766	93.9941	0.010639	8.82274	94.7647	0.0105524
						0.436389	6.86401	87.738	0.0113976	7.59449	82.828	0.0120732	7.27189	82.0542	0.0121871	8.25519	92.6317	0.0107954	8.74698	93.951	0.0106438
						0.519722	6.72815	86.0014	0.0116277	7.33555	80.0039	0.0124994	7.03143	79.3409	0.0126038	8.11234	91.0288	0.0109855	8.60191	92.3928	0.0108234
						0.603056	6.57625	84.0598	0.0118963	7.10656	77.5065	0.0129021	6.78675	76.58	0.0130582	8.01612	89.9491	0.0111174	8.53023	91.6229	0.0109143
						0.686389	6.42305	82.1015	0.01218	6.87835	75.0175	0.0133302	6.53244	73.7104	0.0135666	7.90244	88.6735	0.0112773	8.45662	90.8323	0.0110093
						0.769722	6.30451	80.5863	0.0124091	6.6994	73.0658	0.0136863	6.26188	70.6575	0.0141528	7.80492	87.5792	0.0114182	8.36347	89.8317	0.0111319
						0.853056	6.15297	78.6493	0.0127147	6.47757	70.6465	0.014155	6.07095	68.5031	0.0145979	7.6991	86.3918	0.0115752	8.29469	89.093	0.0112242
						0.936389	6.03879	77.1898	0.0129551	6.28651	68.5627	0.0145852	5.88334	66.3862	0.0150634	7.60195	85.3017	0.0117231	8.18403	87.9044	0.011376
						1.01972	5.91175	75.5659	0.0132335	6.09943	66.5224	0.0150325	5.73115	64.6689	0.0154634	7.53303	84.5283	0.0118304	8.06129	86.586	0.0115492
						1.10306	5.77415	73.8071	0.0135488	5.96807	65.0897	0.0153634	5.5283	62.38	0.0160308	7.39904	83.0248	0.0120446	8.00059	85.9341	0.0116368
						1.18639	5.70893	72.9734	0.0137036	5.80909	63.3558	0.0157839	5.36008	60.4818	0.0165339	7.31571	82.0898	0.0121818	7.93635	85.2441	0.011731
						1.26972	5.59787	71.5538	0.0139755	5.62531	61.3515	0.0162995	5.2144	58.838	0.0169958	7.22823	81.1082	0.0123292	7.86817	84.5117	0.0118327
						1.35306	5.45961	69.7865	0.0143294	5.53022	60.3144	0.0165798	5.00484	56.4734	0.0177075	7.15338	80.2683	0.0124582	7.73662	83.0988	0.0120339
						1.43639	5.40905	69.1403	0.0144634	5.37891	58.6641	0.0170462	4.90237	55.3171	0.0180776	7.10494	79.7247	0.0125432	7.65982	82.2739	0.0121545
						1.51972	5.28763	67.5882	0.0147955	5.22969	57.0367	0.0175326	4.75082	53.6071	0.0186543	6.9806	78.3295	0.0127666	7.59479	81.5754	0.0122586
						1.60306	5.19828	66.4461	0.0150498	5.12075	55.8486	0.0179056	4.61573	52.0828	0.0192002	6.8999	77.424	0.0129159	7.477	80.3102	0.0124517
						1.68639	5.08668	65.0196	0.01538	5.02252	54.7772	0.0182558	4.45896	50.3138	0.0198753	6.80657	76.3767	0.013093	7.42079	79.7064	0.012546
						1.76972	5.00794	64.0131	0.0156218	4.8539	52.9382	0.0188899	4.40074	49.6569	0.0201382	6.75331	75.7791	0.0131963	7.33374	78.7714	0.012695
						1.85306	4.91319	62.802	0.0159231	4.79995	52.3498	0.0191023	4.28152	48.3116	0.020699	6.69932	75.1733	0.0133026	7.2966	78.3725	0.0127596
						1.93639	4.84023	61.8694	0.0161631	4.65428	50.7611	0.0197001	4.1421	46.7384	0.0213957	6.57196	73.7441	0.0135604	7.24694	77.8391	0.012847
						2.01972	4.80441	61.4116	0.0162836	4.57574	49.9045	0.0200383	4.0663	45.8831	0.0217945	6.51033	73.0526	0.0136888	7.21732	77.521	0.0128997
						2.10306	4.68665	59.9063	0.0166927	4.47912	48.8507	0.0204705	3.90876	44.1055	0.0226729	6.44006	72.2641	0.0138381	7.06377	75.8717	0.0131801
						2.18639	4.61626	59.0066	0.0169473	4.42683	48.2805	0.0207123	3.82848	43.1996	0.0231484	6.37893	71.5781	0.0139707	7.06979	75.9364	0.0131689
						2.26972	4.54486	58.0939	0.0172135	4.30391	46.9398	0.0213039	3.74564	42.2649	0.0236603	6.29431	70.6286	0.0141586	6.9835	75.0095	0.0133316
						2.35306	4.44021	56.7562	0.0176192	4.20523	45.8636	0.0218038	3.69862	41.7343	0.0239611	6.26579	70.3086	0.014223	6.93194	74.4557	0.0134308
						2.43639	4.35761	55.7004	0.0179532	4.21706	45.9926	0.0217426	3.66372	41.3405	0.0241893	6.17638	69.3053	0.0144289	6.85143	73.591	0.0135886
						2.51972	4.2813	54.725	0.0182732	4.08318	44.5325	0.0224555	3.5337	39.8734	0.0250794	6.12026	68.6756	0.0145612	6.80967	73.1424	0.013672
						2.60306	4.23301	54.1077	0.0184816	3.99012	43.5176	0.0229792	3.46397	39.0866	0.0255842	6.01441	67.4879	0.0148175	6.73611	72.3523	0.0138213
						2.68639	4.17807	53.4055	0.0187247	3.94779	43.0559	0.0232256	3.38959	38.2473	0.0261456	5.97929	67.0938	0.0149045	6.70004	71.9649	0.0138957
						2.76972	4.12657	52.7472	0.0189584	3.86717	42.1766	0.0237098	3.34766	37.7742	0.0264731	5.9146	66.3679	0.0150675	6.63707	71.2885	0.0140275
						2.85306	4.04266	51.6746	0.0193519	3.80038	41.4482	0.0241265	3.28798	37.1008	0.0269536	5.8561	65.7115	0.015218	6.57159	70.5852	0.0141673
						2.93639	3.98969	50.9975	0.0196088	3.75934	41.0006	0.0243899	3.23441	36.4963	0.0274001	5.78406	64.9031	0.0154076	6.50003	69.8166	0.0143232
						3.01972	3.93519	50.3009	0.0198804	3.65676	39.8818	0.0250741	3.14426	35.4791	0.0281856	5.74223	64.4337	0.0155198	6.46041	69.391	0.0144111
						3.10306	3.84713	49.1753	0.0203354	3.62293	39.5129	0.0253082	3.12758	35.2908	0.028336	5.64655	63.3601	0.0157828	6.40989	68.8484	0.0145247
						3.18639	3.78451	48.3749	0.0206719	3.52991	38.4984	0.0259751	3.03695	34.2682	0.0291816	5.59656	62.7992	0.0159238	6.36408	68.3564	0.0146292
						3.26972	3.73977	47.803	0.0209192	3.54906	38.7072	0.025835	2.94576	33.2392	0.0300849	5.57204	62.524	0.0159939	6.32039	67.8871	0.0147303
						3.35306	3.70258	47.3276	0.0211293	3.45013	37.6282	0.0265758	2.94088	33.1842	0.0301349	5.50702	61.7944	0.0161827	6.25442	67.1785	0.0148857
						3.43639	3.65038	46.6604	0.0214315	3.41865	37.2849	0.0268205	2.89065	32.6174	0.0306585	5.4613	61.2814	0.0163182	6.21944	66.8028	0.0149694
						3.51972	3.62219	46.3	0.0215983	3.34666	36.4998	0.0273974	2.78897	31.47	0.0317762	5.37782	60.3447	0.0165715	6.20176	66.6129	0.0150121
						3.60306	3.59741	45.9833	0.021747	3.29326	35.9174	0.0278417	2.81333	31.7449	0.0315011	5.36466	60.197	0.0166121	6.08811	65.3922	0.0152923
						3.68639	3.49669	44.6958	0.0223734	3.26656	35.6262	0.0280693	2.73159	30.8226	0.0324437	5.30016	59.4732	0.0168143	6.06092	65.1001	0.015361
						3.76972	3.45429	44.1539	0.0226481	3.23066	35.2346	0.0283812	2.7058	30.5316	0.032753	5.2017	58.3684	0.0171326	6.04799	64.9613	0.0153938
						3.85306	3.43448	43.9007	0.0227787	3.18156	34.6991	0.0288192	2.64513	29.847	0.0335042	5.18172	58.1442	0.0171986	6.00664	64.5171	0.0154998
						3.93639	3.37463	43.1356	0.0231827	3.14208	34.2686	0.0291813	2.62103	29.5751	0.0338123	5.11269	57.3696	0.0174308	5.98086	64.2402	0.0155666
						4.01972	3.32176	42.4598	0.0235517	3.06689	33.4485	0.0298967	2.58712	29.1924	0.0342555	5.08341	57.0411	0.0175312	5.89498	63.3178	0.0157934
						4.10306	3.28399	41.977	0.0238225	3.07657	33.5541	0.0298026	2.60657	29.4119	0.0339999	5.02565	56.393	0.0177327	5.85426	62.8804	0.0159032
						4.18639	3.25087	41.5537	0.0240653	2.98345	32.5385	0.0307328	2.53079	28.5568	0.0350179	4.9939	56.0367	0.0178455	5.83653	62.69	0.0159515
						4.26972	3.2279	41.2601	0.0242365	3.00904	32.8176	0.0304715	2.48688	28.0613	0.0356362	4.88435	54.8074	0.0182457	5.74741	61.7327	0.0161989
						4.35306	3.17776	40.6192	0.0246189	2.94467	32.1155	0.0311376	2.48909	28.0863	0.0356046	5.02973	56.4387	0.0177183	5.68554	61.0682	0.0163751
						4.43639	3.14841	40.244	0.0248484	2.89962	31.6242	0.0316214	2.38582	26.921	0.0371457	5.01784	56.3053	0.0177603	5.65995	60.7933	0.0164492
						4.51972	3.10966	39.7487	0.0251581	2.88536	31.4687	0.0317776	2.39829	27.0617	0.0369526	4.79738	53.8315	0.0185765	5.64114	60.5913	0.016504
						4.60306	3.04782	38.9582	0.0256685	2.79828	30.519	0.0327665	2.39644	27.0408	0.0369811	4.77627	53.5947	0.0186586	5.58056	59.9406	0.0166832
						4.68639	3.01241	38.5056	0.0259702	2.74549	29.9432	0.0333966	2.32766	26.2647	0.0380739	4.70771	52.8253	0.0189303	5.54162	59.5223	0.0168004
						4.76972	2.98471	38.1515	0.0262113	2.77475	30.2623	0.0330444	2.33689	26.3689	0.0379235	4.65152	52.1948	0.019159	5.50935	59.1757	0.0168988
						4.85306	2.9894	38.2115	0.0261701	2.76242	30.1279	0.0331919	2.27547	25.6758	0.0389471	4.60705	51.6958	0.0193439	5.47163	58.7706	0.0170153
						4.93639	2.9573	37.8012	0.0264542	2.71064	29.5631	0.0338259	2.27234	25.6405	0.0390008	4.57917	51.383	0.0194617	5.43514	58.3787	0.0171295
						5.01972	2.87004	36.6858	0.0272585	2.66917	29.1108	0.0343515	2.22748	25.1343	0.0397862	4.58729	51.4741	0.0194272	5.42728	58.2942	0.0171544
						5.10306	2.85083	36.4402	0.0274422	2.67761	29.2029	0.0342432	2.20347	24.8634	0.0402197	4.51801	50.6967	0.0197251	5.32628	57.2094	0.0174796
						5.18639	2.82745	36.1414	0.0276691	2.61764	28.5488	0.0350277	2.15844	24.3553	0.0410588	4.54064	50.9506	0.0196268	5.31044	57.0393	0.0175318
						5.26972	2.82975	36.1708	0.0276466	2.63578	28.7467	0.0347866	2.1591	24.3628	0.0410463	4.51584	50.6724	0.0197346	5.24362	56.3215	0.0177552
						5.35306	2.77517	35.4731	0.0281903	2.60558	28.4173	0.0351898	2.08302	23.5043	0.0425454	4.51436	50.6558	0.0197411	5.26824	56.586	0.0176722
						5.43639	2.78244	35.5661	0.0281167	2.56342	27.9575	0.0357686	2.10948	23.8029	0.0420118	4.42146	49.6133	0.0201559	5.16505	55.4776	0.0180253
						5.51972	2.70967	34.6359	0.0288718	2.53049	27.5984	0.036234	2.0585	23.2276	0.0430522	4.44179	49.8414	0.0200636	5.18236	55.6635	0.0179651
						5.60306	2.72253	34.8003	0.0287354	2.52957	27.5883	0.0362472	2.04393	23.0632	0.0433591	4.43533	49.769	0.0200928	5.12397	55.0364	0.0181698
						5.68639	2.67065	34.1371	0.0292936	2.45467	26.7714	0.0373532	2.02033	22.7969	0.0438656	4.35928	48.9156	0.0204434	5.08251	54.5911	0.018318
						5.76972	2.62594	33.5656	0.0297924	2.46475	26.8814	0.0372005	1.97923	22.3331	0.0447765	4.37356	49.0758	0.0203766	5.0181	53.8992	0.0185531
						5.85306	2.66812	34.1048	0.0293214	2.45314	26.7547	0.0373765	1.94528	21.9501	0.045558	4.33039	48.5914	0.0205798	5.03483	54.0789	0.0184915
						5.93639	2.56923	32.8407	0.03045	2.42562	26.4546	0.0378006	1.95926	22.1078	0.0452329	4.28843	48.1206	0.0207811	4.97435	53.4293	0.0187163
						6.01972	2.56839	32.83	0.0304599	2.42691	26.4687	0.0377805	1.98409	22.388	0.0446668	4.27772	48.0004	0.0208332	4.91899	52.8347	0.018927
						6.10306	2.51412	32.1363	0.0311174	2.41893	26.3816	0.0379051	1.93732	21.8602	0.0457452	4.27028	47.9169	0.0208695	4.90464	52.6806	0.0189823
						6.18639	2.51914	32.2005	0.0310554	2.34888	25.6177	0.0390356	1.88171	21.2327	0.0470971	4.1964	47.0879	0.0212369	4.89022	52.5257	0.0190383
						6.26972	2.48368	31.7472	0.0314988	2.33489	25.4651	0.0392695	1.89399	21.3713	0.0467917	4.19983	47.1264	0.0212195	4.86076	52.2093	0.0191537
						6.35306	2.4926	31.8612	0.0313861	2.31418	25.2392	0.0396209	1.83799	20.7394	0.0482173	4.15021	46.5696	0.0214732	4.84928	52.0859	0.019199
						6.43639	2.48038	31.705	0.0315407	2.3093	25.186	0.0397046	1.79844	20.2932	0.0492777	4.13364	46.3837	0.0215593	4.82788	51.8561	0.0192841
						6.51972	2.42294	30.9708	0.0322885	2.2924	25.0017	0.0399973	1.83302	20.6833	0.0483481	4.11147	46.1349	0.0216756	4.77174	51.2531	0.019511
						6.60306	2.41689	30.8935	0.0323693	2.30668	25.1574	0.0397497	1.78816	20.1772	0.049561	4.10993	46.1176	0.0216837	4.67227	50.1847	0.0199264
						6.68639	2.35701	30.1281	0.0331916	2.27282	24.7881	0.0403419	1.78265	20.115	0.0497142	4.06061	45.5642	0.021947	4.65147	49.9613	0.0200155
						6.76972	2.3379	29.8838	0.0334629	2.2309	24.3309	0.0411	1.75886	19.8465	0.0503866	4.04774	45.4198	0.0220168	4.66128	50.0666	0.0199734
						6.85306	2.31549	29.5974	0.0337868	2.18466	23.8266	0.0419699	1.73026	19.5238	0.0512195	4.00251	44.9123	0.0222656	4.60014	49.4099	0.0202388
						6.93639	2.31309	29.5667	0.0338219	2.23835	24.4122	0.0409632	1.74318	19.6696	0.0508398	3.9691	44.5374	0.022453	4.58436	49.2405	0.0203085
						7.01972	2.28493	29.2067	0.0342387	2.21619	24.1705	0.0413728	1.72026	19.411	0.0515172	3.96011	44.4365	0.022504	4.56287	49.0096	0.0204042
						7.10306	2.26423	28.9421	0.0345517	2.21409	24.1476	0.041412	1.70704	19.2618	0.0519162	3.93467	44.151	0.0226495	4.55452	48.9199	0.0204416
						7.18639	2.25955	28.8823	0.0346233	2.17936	23.7688	0.0420719	1.66807	18.8221	0.0531291	3.94616	44.28	0.0225836	4.52147	48.565	0.020591
						7.26972	2.25686	28.8479	0.0346645	2.16761	23.6407	0.0423	1.68122	18.9705	0.0527135	3.89738	43.7326	0.0228662	4.46634	47.9728	0.0208451
						7.35306	2.21669	28.3345	0.0352927	2.11995	23.1209	0.043251	1.63485	18.4472	0.0542086	3.84497	43.1445	0.0231779	4.48462	48.1691	0.0207602
						7.43639	2.21848	28.3573	0.0352642	2.16276	23.5878	0.0423949	1.66975	18.841	0.0530756	3.85729	43.2828	0.0231039	4.43552	47.6418	0.02099
						7.51972	2.17071	27.7467	0.0360403	2.08388	22.7275	0.0439996	1.62695	18.3581	0.0544719	3.8284	42.9586	0.0232782	4.40479	47.3117	0.0211364
						7.60306	2.18167	27.8868	0.0358592	2.09706	22.8712	0.0437231	1.63718	18.4735	0.0541315	3.77495	42.3588	0.0236078	4.36491	46.8833	0.0213295
						7.68639	2.11648	27.0535	0.0369637	2.10539	22.9621	0.0435501	1.62384	18.323	0.0545762	3.79323	42.5639	0.0234941	4.36191	46.8511	0.0213442
						7.76972	2.13888	27.3399	0.0365766	2.05167	22.3762	0.0446904	1.56504	17.6595	0.0566267	3.7495	42.0732	0.0237681	4.28289	46.0024	0.021738
						7.85306	2.13607	27.304	0.0366247	2.06232	22.4923	0.0444596	1.58225	17.8537	0.0560107	3.75887	42.1784	0.0237088	4.30938	46.2869	0.0216044
						7.93639	2.08198	26.6126	0.0375762	2.0534	22.3951	0.0446527	1.55679	17.5664	0.0569268	3.74652	42.0398	0.023787	4.28708	46.0474	0.0217168
						8.01972	2.0648	26.393	0.0378889	2.05145	22.3738	0.0446952	1.53227	17.2898	0.0578377	3.70503	41.5742	0.0240534	4.24917	45.6402	0.0219105
						8.10306	2.06549	26.4018	0.0378762	2.02007	22.0315	0.0453895	1.56992	17.7146	0.0564506	3.6885	41.3888	0.0241611	4.20131	45.1261	0.0221601
						8.18639	2.01122	25.7081	0.0388983	1.98143	21.6101	0.0462746	1.53771	17.3511	0.0576331	3.66334	41.1064	0.0243271	4.17046	44.7948	0.022324
						8.26972	2.04535	26.1443	0.0382492	1.93998	21.1581	0.0472633	1.5259	17.2179	0.0580792	3.62405	40.6656	0.0245908	4.13233	44.3852	0.02253
						8.35306	2.02735	25.9143	0.0385888	1.93737	21.1296	0.047327	1.5276	17.2371	0.0580145	3.62118	40.6334	0.0246103	4.10341	44.0746	0.0226888
						8.43639	1.97694	25.2699	0.0395728	1.96327	21.4121	0.0467026	1.51688	17.1161	0.0584245	3.59495	40.339	0.0247899	4.11577	44.2073	0.0226207
						8.51972	1.97959	25.3038	0.0395198	1.92895	21.0378	0.0475336	1.48424	16.7478	0.0597093	3.57149	40.0758	0.0249527	4.0808	43.8317	0.0228145
						8.60306	1.93511	24.7352	0.0404282	1.93542	21.1083	0.0473747	1.51443	17.0885	0.058519	3.55654	39.908	0.0250576	4.04708	43.4695	0.0230046
						8.68639	1.95867	25.0364	0.0399419	1.93677	21.123	0.0473417	1.45731	16.4439	0.0608127	3.52914	39.6006	0.0252522	4.04528	43.4502	0.0230148
						8.76972	1.92309	24.5816	0.0406809	1.90053	20.7278	0.0482444	1.47557	16.65	0.0600602	3.47415	38.9835	0.0256519	4.01679	43.1442	0.0231781
						8.85306	1.90877	24.3985	0.0409861	1.92732	21.02	0.0475738	1.46215	16.4985	0.0606114	3.52627	39.5684	0.0252727	4.00882	43.0586	0.0232242
						8.93639	1.88011	24.0322	0.0416109	1.89093	20.6231	0.0484893	1.43517	16.1941	0.0617509	3.48919	39.1523	0.0255413	3.94723	42.3971	0.0235865
						9.01972	1.85983	23.773	0.0420646	1.90759	20.8048	0.0480658	1.41735	15.993	0.0625273	3.47806	39.0274	0.025623	3.926	42.169	0.0237141
						9.10306	1.87117	23.9179	0.0418097	1.90147	20.7381	0.0482205	1.39568	15.7485	0.0634981	3.46633	38.8958	0.0257097	3.90674	41.9622	0.023831
						9.18639	1.85723	23.7397	0.0421235	1.85867	20.2713	0.0493309	1.40644	15.8699	0.0630123	3.48014	39.0507	0.0256077	3.8475	41.3259	0.0241979
						9.26972	1.82735	23.3578	0.0428123	1.83575	20.0213	0.0499468	1.38153	15.5888	0.0641484	3.40908	38.2534	0.0261415	3.84257	41.2729	0.024229
						9.35306	1.84909	23.6357	0.0423089	1.82546	19.9091	0.0502284	1.4022	15.8221	0.0632028	3.37866	37.912	0.0263768	3.8377	41.2206	0.0242597
						9.43639	1.80367	23.0551	0.0433743	1.82708	19.9267	0.0501838	1.36198	15.3682	0.0650692	3.35098	37.6014	0.0265947	3.82256	41.058	0.0243558
						9.51972	1.82068	23.2725	0.0429691	1.811	19.7514	0.0506294	1.34926	15.2247	0.0656827	3.41366	38.3048	0.0261064	3.83382	41.1789	0.0242843
						9.60306	1.7901	22.8816	0.0437031	1.8097	19.7372	0.0506658	1.35346	15.2721	0.0654788	3.37804	37.9051	0.0263817	3.82356	41.0687	0.0243494
						9.68639	1.78751	22.8485	0.0437665	1.8054	19.6903	0.0507865	1.37882	15.5583	0.0642745	3.32084	37.2632	0.0268361	3.7662	40.4526	0.0247203
						9.76972	1.75225	22.3978	0.0446472	1.81347	19.7783	0.0505605	1.34639	15.1923	0.0658227	3.34864	37.5752	0.0266133	3.75696	40.3534	0.0247811
						9.85306	1.76047	22.5029	0.0444387	1.85181	20.1964	0.0495137	1.3223	14.9205	0.0670219	3.3192	37.2448	0.0268494	3.71487	39.9013	0.0250618
						9.93639	1.73714	22.2047	0.0450355	1.79763	19.6055	0.051006	1.30527	14.7283	0.0678963	3.26912	36.6829	0.0272607	3.7047	39.7921	0.0251306
						10.0197	1.71608	21.9355	0.0455882	1.78493	19.467	0.0513689	1.29102	14.5676	0.0686457	3.29769	37.0035	0.0270245	3.70694	39.8161	0.0251155
						10.1031	1.67742	21.4413	0.0466389	1.78555	19.4738	0.0513511	1.26193	14.2393	0.0702281	3.28059	36.8116	0.0271654	3.65545	39.2631	0.0254692
						10.1864	1.69153	21.6217	0.0462498	1.73867	18.9625	0.0527357	1.30233	14.6952	0.0680496	3.24718	36.4367	0.0274449	3.67352	39.4572	0.0253439
						10.2697	1.70773	21.8288	0.0458111	1.7612	19.2082	0.052061	1.26997	14.33	0.0697835	3.26302	36.6144	0.0273116	3.68508	39.5813	0.0252644
						10.3531	1.66476	21.2795	0.0469936	1.72419	18.8046	0.0531785	1.27078	14.3392	0.0697391	3.26419	36.6276	0.0273018	3.6444	39.1444	0.0255465
						10.4364	1.65368	21.1379	0.0473084	1.73902	18.9663	0.052725	1.28106	14.4552	0.0691794	3.26828	36.6735	0.0272677	3.65273	39.2338	0.0254882
						10.5197	1.67237	21.3768	0.0467797	1.74582	19.0405	0.0525197	1.28679	14.5198	0.0688714	3.22773	36.2184	0.0276102	3.62307	38.9153	0.0256969
						10.6031	1.62623	20.787	0.048107	1.74377	19.0181	0.0525814	1.26618	14.2873	0.0699924	3.2145	36.07	0.0277239	3.58355	38.4908	0.0259802
						10.6864	1.6202	20.7099	0.048286	1.73813	18.9566	0.052752	1.28185	14.4641	0.0691368	3.18715	35.7631	0.0279618	3.55869	38.2238	0.0261617
						10.7697	1.64343	21.0069	0.0476035	1.74194	18.9982	0.0526367	1.21942	13.7596	0.0726764	3.16189	35.4797	0.0281852	3.5341	37.9596	0.0263438
						10.8531	1.5968	20.4108	0.0489936	1.67675	18.2872	0.0546831	1.23929	13.9838	0.0715111	3.1344	35.1712	0.0284324	3.52849	37.8994	0.0263856
						10.9364	1.61792	20.6808	0.0483541	1.69974	18.5379	0.0539435	1.20327	13.5774	0.0736518	3.14206	35.2571	0.028363	3.56666	38.3094	0.0261033
						11.0197	1.58803	20.2987	0.0492642	1.67044	18.2184	0.0548897	1.22701	13.8453	0.0722268	3.14298	35.2675	0.0283547	3.51894	37.7968	0.0264573
						11.1031	1.58944	20.3167	0.0492205	1.68873	18.4178	0.0542952	1.20358	13.5809	0.0736328	3.09878	34.7715	0.0287592	3.50568	37.6544	0.0265573
						11.1864	1.55617	19.8915	0.0502728	1.67946	18.3167	0.0545949	1.22477	13.82	0.0723589	3.13216	35.1461	0.0284527	3.48257	37.4062	0.0267336
						11.2697	1.56343	19.9843	0.0500393	1.64881	17.9825	0.0556097	1.21015	13.655	0.0732331	3.09671	34.7483	0.0287784	3.44722	37.0265	0.0270077
						11.3531	1.51967	19.4249	0.0514803	1.68262	18.3512	0.0544923	1.17527	13.2615	0.0754065	3.09229	34.6987	0.0288195	3.47724	37.3489	0.0267745
						11.4364	1.52177	19.4518	0.0514092	1.66084	18.1137	0.0552069	1.18575	13.3797	0.07474	3.08868	34.6582	0.0288532	3.411	36.6374	0.0272945
						11.5197	1.53981	19.6824	0.0508069	1.6374	17.858	0.0559973	1.1611	13.1016	0.0763268	3.09063	34.68	0.028835	3.43357	36.8799	0.0271151
						11.6031	1.52546	19.4989	0.0512849	1.63276	17.8074	0.0561564	1.13706	12.8303	0.0779405	3.03465	34.0519	0.0293669	3.414	36.6697	0.0272705
						11.6864	1.53283	19.5931	0.0510383	1.66338	18.1414	0.0551226	1.15084	12.9858	0.0770072	3.02409	33.9334	0.0294695	3.36368	36.1292	0.0276785
						11.7697	1.50039	19.1785	0.0521418	1.63138	17.7924	0.0562039	1.16759	13.1748	0.0759025	3.04269	34.1421	0.0292893	3.37555	36.2567	0.0275811
						11.8531	1.50063	19.1815	0.0521334	1.61548	17.619	0.0567571	1.15667	13.0516	0.0766191	3.02942	33.9932	0.0294176	3.3438	35.9156	0.027843
						11.9364	1.50655	19.2572	0.0519286	1.62033	17.6718	0.0565872	1.10108	12.4243	0.0804873	3.02253	33.9159	0.0294847	3.33364	35.8065	0.0279279
						12.0197	1.48508	18.9828	0.0526793	1.6219	17.689	0.0565324	1.158	13.0666	0.0765311	2.99587	33.6167	0.0297471	3.35481	36.0339	0.0277516
						12.1031	1.48227	18.9469	0.0527792	1.62108	17.68	0.056561	1.091	12.3106	0.081231	2.99269	33.5811	0.0297787	3.27811	35.2101	0.028401
						12.1864	1.47874	18.9017	0.0529052	1.62326	17.7038	0.056485	1.11886	12.6249	0.0792083	2.95463	33.154	0.0301623	3.30917	35.5437	0.0281344
						12.2697	1.49444	19.1024	0.0523494	1.62627	17.7366	0.0563805	1.1263	12.7089	0.0786851	2.94075	32.9982	0.0303047	3.26783	35.0996	0.0284903
						12.3531	1.45671	18.6201	0.0537053	1.61738	17.6397	0.0566904	1.11559	12.588	0.0794405	2.93476	32.931	0.0303665	3.2858	35.2927	0.0283345
						12.4364	1.42713	18.242	0.0548184	1.61525	17.6164	0.0567651	1.09049	12.3048	0.081269	2.92904	32.8668	0.0304258	3.24837	34.8906	0.028661
						12.5197	1.43392	18.3288	0.0545588	1.58326	17.2676	0.0579121	1.07239	12.1006	0.0826406	2.96152	33.2313	0.0300921	3.24965	34.9044	0.0286497
						12.6031	1.40992	18.0221	0.0554875	1.58908	17.331	0.0577	1.10288	12.4446	0.080356	2.95079	33.1109	0.0302015	3.24281	34.8309	0.0287101
						12.6864	1.38287	17.6763	0.0565729	1.58658	17.3038	0.0577909	1.09809	12.3906	0.0807065	2.9079	32.6296	0.030647	3.2065	34.4409	0.0290352
						12.7697	1.40497	17.9588	0.055683	1.58484	17.2848	0.0578544	1.07113	12.0864	0.0827379	2.88589	32.3827	0.0308807	3.20697	34.446	0.029031
						12.8531	1.37651	17.595	0.0568343	1.56304	17.047	0.0586613	1.04336	11.773	0.08494	2.89941	32.5344	0.0307367	3.19073	34.2715	0.0291787
						12.9364	1.36308	17.4233	0.0573943	1.5552	16.9615	0.058957	1.0764	12.1458	0.0823328	2.86295	32.1252	0.0311282	3.16894	34.0375	0.0293794
						13.0197	1.35778	17.3556	0.0576183	1.54161	16.8133	0.0594767	1.08484	12.2411	0.0816922	2.87755	32.2891	0.0309702	3.18529	34.2131	0.0292286
						13.1031	1.38078	17.6496	0.0566586	1.5362	16.7543	0.0596862	1.06923	12.0649	0.0828849	2.85016	31.9817	0.0312679	3.12999	33.6191	0.029745
						13.1864	1.36095	17.3961	0.0574841	1.55957	17.0092	0.0587918	1.07623	12.1439	0.0823458	2.82062	31.6503	0.0315953	3.12679	33.5847	0.0297754
						13.2697	1.37254	17.5443	0.0569987	1.52302	16.6106	0.0602027	1.02501	11.566	0.0864606	2.84813	31.9589	0.0312901	3.11978	33.5094	0.0298423
						13.3531	1.33721	17.0927	0.0585046	1.52407	16.622	0.0601612	1.04966	11.8441	0.0844302	2.81513	31.5887	0.0316569	3.05236	32.7853	0.0305015
						13.4364	1.33752	17.0966	0.0584911	1.5383	16.7772	0.0596047	1.04018	11.7371	0.0851997	2.82242	31.6705	0.0315752	3.10004	33.2974	0.0300324
						13.5197	1.36313	17.424	0.0573922	1.49402	16.2943	0.0613713	1.0226	11.5388	0.0866644	2.82941	31.7489	0.0314972	3.07213	32.9976	0.0303052
						13.6031	1.30106	16.6306	0.0601302	1.55424	16.951	0.0589934	1.03619	11.6921	0.0855278	2.79264	31.3363	0.0319119	3.06427	32.9132	0.0303829
						13.6864	1.29061	16.497	0.0606171	1.48618	16.2088	0.061695	1.03691	11.7002	0.0854684	2.76696	31.0481	0.0322081	3.06004	32.8678	0.0304249
						13.7697	1.30157	16.6371	0.0601066	1.53699	16.7629	0.0596555	0.9905	11.1766	0.089473	2.76628	31.0405	0.032216	3.01427	32.3762	0.0308869
						13.8531	1.30917	16.7342	0.0597577	1.47199	16.054	0.0622898	0.97946	11.052	0.0904815	2.7582	30.9498	0.0323103	3.06788	32.952	0.0303472
						13.9364	1.27213	16.2608	0.0614976	1.48827	16.2316	0.0616084	0.98173	11.0776	0.0902723	2.75721	30.9387	0.0323219	3.00128	32.2366	0.0310206
						14.0197	1.28483	16.4231	0.0608898	1.47192	16.0532	0.0622927	1.03271	11.6528	0.085816	2.73756	30.7182	0.032554	3.01128	32.3441	0.0309176
						14.1031	1.30125	16.633	0.0601214	1.49335	16.287	0.0613988	0.98023	11.0607	0.0904104	2.78037	31.1986	0.0320527	2.97727	31.9788	0.0312708
						14.1864	1.29165	16.5103	0.0605683	1.52719	16.656	0.0600383	0.97891	11.0458	0.0905323	2.7143	30.4572	0.0328329	2.93156	31.4878	0.0317583
						14.2697	1.25762	16.0753	0.0622072	1.51165	16.4865	0.0606555	1.04102	11.7466	0.0851309	2.70454	30.3477	0.0329514	2.94967	31.6823	0.0315634
						14.3531	1.2698	16.231	0.0616105	1.46442	15.9714	0.0626118	1.01673	11.4725	0.0871647	2.7143	30.4572	0.0328329	2.92905	31.4608	0.0317856
						14.4364	1.23528	15.7898	0.0633322	1.47998	16.1411	0.0619535	0.98649	11.1313	0.0898367	2.7454	30.8062	0.032461	2.92832	31.453	0.0317935
						14.5197	1.23767	15.8203	0.0632099	1.49159	16.2678	0.0614712	0.97675	11.0214	0.0907325	2.71132	30.4238	0.032869	2.91415	31.3008	0.0319481
						14.6031	1.21169	15.4882	0.0645652	1.44127	15.719	0.0636174	1.00457	11.3353	0.0882198	2.71566	30.4725	0.0328165	2.88377	30.9745	0.0322846
						14.6864	1.23122	15.7379	0.063541	1.43424	15.6423	0.0639293	0.94793	10.6962	0.0934911	2.66507	29.9048	0.0334394	2.86838	30.8092	0.0324579
						14.7697	1.19555	15.2819	0.0654368	1.45108	15.826	0.0631874	0.9451	10.6643	0.093771	2.69156	30.2021	0.0331103	2.88694	31.0085	0.0322492
						14.8531	1.20473	15.3993	0.0649382	1.46108	15.935	0.0627549	0.9352	10.5526	0.0947637	2.66669	29.923	0.0334191	2.89449	31.0896	0.0321651
						14.9364	1.19006	15.2117	0.0657387	1.46115	15.9358	0.0627519	0.94618	10.6765	0.093664	2.65454	29.7867	0.0335721	2.85441	30.6591	0.0326167
						15.0197	1.19182	15.2342	0.0656416	1.43752	15.6781	0.0637834	0.96037	10.8366	0.0922801	2.6329	29.5438	0.033848	2.81256	30.2096	0.033102
						15.1031	1.19482	15.2726	0.0654768	1.43248	15.6231	0.0640078	0.933	10.5277	0.0949871	2.70142	30.3127	0.0329895	2.83187	30.417	0.0328763
						15.1864	1.18306	15.1223	0.0661277	1.45319	15.849	0.0630956	0.95854	10.8159	0.0924562	2.65652	29.8089	0.033547	2.83646	30.4663	0.0328231
						15.2697	1.21884	15.5796	0.0641864	1.45807	15.9022	0.0628844	0.97107	10.9573	0.0912632	2.63524	29.5701	0.0338179	2.83876	30.491	0.0327965
						15.3531	1.16842	14.9351	0.0669562	1.41311	15.4118	0.0648852	0.91196	10.2903	0.0971786	2.66991	29.9591	0.0333788	2.75837	29.6276	0.0337524
						15.4364	1.19859	15.3208	0.0652709	1.42412	15.5319	0.0643835	0.92678	10.4576	0.0956246	2.59492	29.1177	0.0343434	2.77189	29.7728	0.0335877
						15.5197	1.15176	14.7222	0.0679247	1.46624	15.9913	0.062534	0.92118	10.3944	0.096206	2.58521	29.0087	0.0344724	2.77468	29.8027	0.033554
						15.6031	1.147	14.6613	0.0682066	1.43203	15.6182	0.0640279	0.92245	10.4087	0.0960735	2.61274	29.3176	0.0341092	2.77338	29.7888	0.0335697
						15.6864	1.15154	14.7194	0.0679377	1.43934	15.6979	0.0637027	0.92304	10.4154	0.0960121	2.57229	28.8637	0.0346455	2.72915	29.3137	0.0341137
						15.7697	1.11465	14.2478	0.0701862	1.39842	15.2516	0.0655668	0.9338	10.5368	0.0949058	2.61443	29.3366	0.0340871	2.73526	29.3793	0.0340375
						15.8531	1.12259	14.3493	0.0696897	1.40588	15.333	0.0652189	0.92801	10.4714	0.0954979	2.57147	28.8545	0.0346566	2.73335	29.3588	0.0340613
						15.9364	1.12868	14.4272	0.0693137	1.40685	15.3436	0.0651739	0.89646	10.1154	0.0988588	2.54703	28.5803	0.0349891	2.74765	29.5124	0.033884
						16.0197	1.12037	14.3209	0.0698278	1.41925	15.4788	0.0646045	0.92759	10.4667	0.0955411	2.55771	28.7001	0.034843	2.7017	29.0189	0.0344603
						16.1031	1.14192	14.5964	0.0685101	1.4039	15.3114	0.0653108	0.93144	10.5101	0.0951462	2.52953	28.3839	0.0352312	2.7072	29.0779	0.0343903
						16.1864	1.12188	14.3402	0.0697338	1.42485	15.5399	0.0643506	0.89917	10.146	0.0985609	2.53959	28.4968	0.0350916	2.72121	29.2284	0.0342133
						16.2697	1.1457	14.6447	0.068284	1.37131	14.956	0.066863	0.90653	10.2291	0.0977607	2.56399	28.7706	0.0347577	2.69538	28.951	0.0345411
						16.3531	1.10617	14.1394	0.0707242	1.37391	14.9843	0.0667365	0.89445	10.0928	0.099081	2.57774	28.9249	0.0345723	2.67415	28.723	0.0348154
						16.4364	1.09328	13.9747	0.0715581	1.38879	15.1466	0.0660214	0.90496	10.2113	0.0979303	2.57754	28.9226	0.034575	2.68024	28.7884	0.0347363
						16.5197	1.10616	14.1393	0.0707248	1.40422	15.3149	0.065296	0.878	9.90713	0.100937	2.4901	27.9415	0.0357891	2.65813	28.5509	0.0350252
						16.6031	1.07554	13.7479	0.0727383	1.38816	15.1397	0.0660514	0.89289	10.0751	0.0992541	2.46347	27.6427	0.036176	2.64744	28.4361	0.0351666
						16.6864	1.09564	14.0048	0.0714039	1.36904	14.9312	0.0669739	0.85447	9.64163	0.103717	2.58502	29.0066	0.0344749	2.63096	28.2591	0.0353869
						16.7697	1.08126	13.821	0.0723536	1.32732	14.4762	0.069079	0.89926	10.147	0.098551	2.48213	27.852	0.035904	2.59729	27.8974	0.0358456
						16.8531	1.07884	13.7901	0.0725159	1.38952	15.1546	0.0659867	0.92437	10.4304	0.0958739	2.53105	28.401	0.0352101	2.5568	27.4625	0.0364133
						16.9364	1.07894	13.7914	0.0725091	1.38534	15.109	0.0661858	0.90076	10.164	0.0983869	2.49364	27.9812	0.0357383	2.56384	27.5381	0.0363133
						17.0197	1.06042	13.5546	0.0737755	1.37699	15.0179	0.0665872	0.89555	10.1052	0.0989593	2.49981	28.0504	0.0356501	2.60608	27.9918	0.0357247
						17.1031	1.06052	13.5559	0.0737685	1.41826	15.468	0.0646496	0.89196	10.0647	0.0993576	2.55828	28.7065	0.0348353	2.56317	27.5309	0.0363228
						17.1864	1.03695	13.2546	0.0754453	1.36448	14.8815	0.0671977	0.88779	10.0176	0.0998243	2.50429	28.1007	0.0355863	2.55007	27.3902	0.0365094
						17.2697	1.07887	13.7905	0.0725138	1.35697	14.7996	0.0675696	0.84993	9.5904	0.104271	2.44517	27.4373	0.0364467	2.55994	27.4962	0.0363686
						17.3531	1.05461	13.4804	0.0741819	1.35098	14.7342	0.0678692	0.87727	9.8989	0.101021	2.52476	28.3304	0.0352978	2.54077	27.2903	0.036643
						17.4364	1.05754	13.5178	0.0739764	1.38699	15.127	0.0661071	0.81921	9.24376	0.108181	2.5137	28.2063	0.0354531	2.58123	27.7249	0.0360687
						17.5197	1.0714	13.695	0.0730194	1.36082	14.8415	0.0673784	0.84068	9.48603	0.105418	2.49873	28.0383	0.0356655	2.54572	27.3435	0.0365718
						17.6031	1.05645	13.5039	0.0740527	1.36747	14.9141	0.0670508	0.84759	9.564	0.104559	2.531	28.4004	0.0352107	2.52714	27.1439	0.0368407
						17.6864	0.95909	12.2594	0.08157	1.34803	14.7021	0.0680177	0.83669	9.441	0.105921	2.4311	27.2794	0.0366576	2.48424	26.6831	0.0374769
						17.7697	1.04297	13.3316	0.0750098	1.35183	14.7435	0.0678265	0.87219	9.84158	0.10161	2.44661	27.4535	0.0364253	2.55072	27.3972	0.0365001
						17.8531	1.01588	12.9853	0.0770101	1.34721	14.6931	0.0680591	0.83736	9.44856	0.105836	2.42519	27.2131	0.036747	2.48372	26.6776	0.0374847
						17.9364	1.01548	12.9802	0.0770404	1.35186	14.7438	0.067825	0.79991	9.02599	0.110791	2.43917	27.37	0.0365364	2.51256	26.9873	0.0370544
						18.0197	1.01075	12.9197	0.0774009	1.3256	14.4574	0.0691686	0.83695	9.44394	0.105888	2.39453	26.8691	0.0372175	2.47687	26.604	0.0375884
						18.1031	0.9977	12.7529	0.0784134	1.35614	14.7905	0.0676109	0.84076	9.48693	0.105408	2.3922	26.8429	0.0372537	2.4468	26.281	0.0380503
						18.1864	1.00992	12.9091	0.0774646	1.35093	14.7337	0.0678717	0.80941	9.13318	0.109491	2.39532	26.878	0.0372052	2.47389	26.572	0.0376336
						18.2697	0.99541	12.7237	0.0785937	1.34007	14.6152	0.0684217	0.83376	9.40794	0.106293	2.39253	26.8466	0.0372486	2.49789	26.8298	0.0372721
						18.3531	0.98749	12.6224	0.0792241	1.34154	14.6313	0.0683468	0.8332	9.40162	0.106365	2.40091	26.9407	0.0371186	2.44748	26.2883	0.0380397
						18.4364	0.98319	12.5675	0.0795706	1.34834	14.7054	0.0680021	0.85169	9.61026	0.104055	2.37823	26.6862	0.0374726	2.46967	26.5266	0.037698
						18.5197	0.99964	12.7777	0.0782612	1.3031	14.212	0.0703629	0.82617	9.3223	0.10727	2.45959	27.5991	0.036233	2.43845	26.1913	0.0381806
						18.6031	0.9714	12.4168	0.0805363	1.32316	14.4308	0.0692962	0.81691	9.21781	0.108486	2.45854	27.5873	0.0362485	2.40019	25.7804	0.0387892
						18.6864	0.9948	12.7159	0.0786419	1.29393	14.112	0.0708616	0.81848	9.23553	0.108278	2.35747	26.4532	0.0378026	2.43796	26.186	0.0381883
						18.7697	0.9662	12.3503	0.0809698	1.30225	14.2028	0.0704088	0.74471	8.40312	0.119003	2.33785	26.2331	0.0381198	2.42265	26.0216	0.0384296
						18.8531	0.9349	11.9502	0.0836806	1.31464	14.3379	0.0697453	0.77494	8.74423	0.114361	2.41723	27.1238	0.036868	2.42613	26.059	0.0383745
						18.9364	0.96165	12.2921	0.0813529	1.32698	14.4725	0.0690967	0.81532	9.19987	0.108697	2.40354	26.9702	0.037078	2.37534	25.5134	0.039195
						19.0197	0.96338	12.3142	0.0812068	1.31935	14.3893	0.0694963	0.79629	8.98514	0.111295	2.41044	27.0476	0.0369718	2.44159	26.225	0.0381315
						19.1031	0.96548	12.3411	0.0810302	1.33746	14.5868	0.0685552	0.79723	8.99575	0.111164	2.31629	25.9912	0.0384746	2.3721	25.4786	0.0392486
						19.1864	0.98781	12.6265	0.0791984	1.2952	14.1259	0.0707921	0.82549	9.31462	0.107358	2.31272	25.9511	0.038534	2.33171	25.0448	0.0399284
						19.2697	0.95883	12.2561	0.0815921	1.3312	14.5185	0.0688776	0.76477	8.62948	0.115882	2.4094	27.0359	0.0369878	2.38252	25.5906	0.0390769
						19.3531	0.94024	12.0185	0.0832054	1.3177	14.3713	0.0695833	0.78606	8.86971	0.112743	2.32408	26.0786	0.0383457	2.34231	25.1587	0.0397477
						19.4364	0.97163	12.4197	0.0805173	1.31212	14.3104	0.0698792	0.79647	8.98717	0.11127	2.29419	25.7432	0.0388453	2.35161	25.2586	0.0395905
						19.5197	0.95053	12.15	0.0823046	1.29502	14.1239	0.0708019	0.76745	8.65972	0.115477	2.40532	26.9902	0.0370505	2.33819	25.1144	0.0398178
						19.6031	0.93235	11.9176	0.0839095	1.27271	13.8806	0.072043	0.79468	8.96697	0.11152	2.30745	25.892	0.038622	2.35442	25.2887	0.0395433
						19.6864	0.92759	11.8568	0.0843401	1.28089	13.9698	0.071583	0.8007	9.0349	0.110682	2.29774	25.783	0.0387852	2.33448	25.0746	0.039881
						19.7697	0.91981	11.7573	0.0850534	1.30678	14.2522	0.0701648				2.39584	26.8838	0.0371971	2.29907	24.6942	0.0404953
						19.8531	0.94787	12.116	0.0825356	1.32597	14.4615	0.0691493				2.2895	25.6905	0.0389248	2.31008	24.8125	0.0403023
						19.9364	0.94072	12.0246	0.0831629	1.32243	14.4229	0.0693344				2.2937	25.7377	0.0388536	2.30749	24.7847	0.0403475
						20.0197	0.93438	11.9436	0.0837272	1.29749	14.1508	0.0706671				2.23404	25.0682	0.0398911	2.30844	24.7949	0.0403309
						20.1031	0.93375	11.9355	0.0837837	1.27191	13.8719	0.0720884				2.26816	25.4511	0.0392911	2.27902	24.4789	0.0408516
						20.1864	0.92003	11.7601	0.0850331	1.29783	14.1546	0.0706486				2.23993	25.1343	0.0397862	2.29121	24.6098	0.0406342
						20.2697	0.88842	11.3561	0.0880586	1.31205	14.3096	0.0698829				2.29747	25.78	0.0387898	2.27159	24.3991	0.0409852
						20.3531	0.92653	11.8432	0.0844366	1.25767	13.7166	0.0729046				2.25271	25.2777	0.0395605	2.30752	24.785	0.040347
						20.4364	0.9352	11.954	0.0836538	1.2594	13.7354	0.0728044				2.25212	25.2711	0.0395709	2.18022	23.4177	0.0427028
						20.5197	0.88431	11.3035	0.0884678	1.2818	13.9797	0.0715321				2.3605	26.4872	0.037754	2.25823	24.2556	0.0412276
						20.6031	0.92386	11.8091	0.0846806	1.31728	14.3667	0.0696055				2.35658	26.4432	0.0378168	2.24532	24.1169	0.0414647
						20.6864	0.91392	11.682	0.0856016	1.26033	13.7456	0.0727507				2.22579	24.9757	0.040039	2.26296	24.3064	0.0411415
						20.7697	0.88588	11.3236	0.0883111	1.25152	13.6495	0.0732628				2.23835	25.1166	0.0398143	2.23321	23.9868	0.0416895
						20.8531	0.92607	11.8373	0.0844785	1.30907	14.2771	0.070042				2.21946	24.9046	0.0401532	2.21517	23.7931	0.0420291
						20.9364	0.90867	11.6149	0.0860962	1.27479	13.9033	0.0719255				2.22474	24.9639	0.0400579	2.24887	24.155	0.0413992
						21.0197	0.91144	11.6503	0.0858345	1.22034	13.3094	0.0751347				2.2379	25.1115	0.0398223	2.20055	23.636	0.0423083
						21.1031	0.93385	11.9368	0.0837747	1.25002	13.6331	0.0733507				2.18435	24.5107	0.0407986	2.21387	23.7791	0.0420537
						21.1864	0.89768	11.4744	0.0871502	1.24851	13.6167	0.0734395				2.20284	24.7181	0.0404561	2.21366	23.7768	0.0420577
						21.2697	0.93772	11.9862	0.083429	1.23177	13.4341	0.0744375				2.19049	24.5795	0.0406842	2.17793	23.3931	0.0427477
						21.3531	0.89394	11.4266	0.0875148	1.25081	13.6417	0.0733044				2.18051	24.4676	0.0408704	2.1677	23.2832	0.0429494
						21.4364	0.92231	11.7893	0.0848229	1.24462	13.5742	0.073669				2.1906	24.5808	0.0406822	2.18948	23.5171	0.0425222
						21.5197	0.89342	11.42	0.0875658	1.26978	13.8486	0.0722093				2.14688	24.0902	0.0415107	2.16634	23.2686	0.0429764
						21.6031	0.89797	11.4781	0.0871221	1.28127	13.9739	0.0715617				2.17612	24.4183	0.0409529	2.17281	23.3381	0.0428484
						21.6864	0.89322	11.4174	0.0875854	1.22289	13.3372	0.074978				2.18642	24.5339	0.04076	2.11683	22.7368	0.0439816
						21.7697	0.90995	11.6313	0.0859751	1.24616	13.591	0.073578				2.17398	24.3943	0.0409932	2.14922	23.0847	0.0433187
						21.8531	0.87942	11.241	0.0889598	1.20116	13.1002	0.0763345				2.16285	24.2694	0.0412042	2.11687	22.7372	0.0439807
						21.9364	0.88977	11.3733	0.087925	1.25923	13.7336	0.0728143				2.17258	24.3786	0.0410196	2.13151	22.8945	0.0436787
						22.0197	0.91671	11.7177	0.0853411	1.2588	13.7289	0.0728391				2.18439	24.5111	0.0407978	2.15564	23.1537	0.0431897
						22.1031	0.87545	11.1903	0.0893632	1.24692	13.5993	0.0735331				2.17641	24.4216	0.0409474	2.15867	23.1862	0.0431291
						22.1864	0.89786	11.4767	0.0871327	1.22955	13.4099	0.0745719				2.17427	24.3975	0.0409877	2.13356	22.9165	0.0436367
						22.2697	0.92383	11.8087	0.0846833	1.22923	13.4064	0.0745913				2.16454	24.2884	0.041172	2.11229	22.688	0.0440761
						22.3531	0.91032	11.636	0.0859401	1.26187	13.7624	0.0726619				2.11589	23.7425	0.0421186	2.09558	22.5086	0.0444276
						22.4364	0.86705	11.0829	0.0902289	1.24723	13.6027	0.0735148				2.10529	23.6235	0.0423307	2.12494	22.8239	0.0438137
						22.5197	0.87771	11.2192	0.0891331	1.22574	13.3683	0.0748037				2.13233	23.9269	0.0417939	2.17788	23.3925	0.0427487
						22.6031	0.86796	11.0946	0.0901343	1.19885	13.075	0.0764815				2.13727	23.9824	0.0416973	2.16747	23.2807	0.042954
						22.6864	0.88916	11.3655	0.0879853	1.24346	13.5616	0.0737377				2.12289	23.821	0.0419798	2.15286	23.1238	0.0432455
						22.7697	0.89845	11.4843	0.0870755	1.2124	13.2228	0.0756268				2.13868	23.9982	0.0416698	2.15304	23.1257	0.0432419
						22.8531	0.84944	10.8578	0.0920995	1.26184	13.762	0.0726636				2.1192	23.7796	0.0420529	2.11832	22.7528	0.0439506
						22.9364	0.84012	10.7387	0.0931212	1.24969	13.6295	0.0733701				2.09922	23.5554	0.0424531	2.13012	22.8795	0.0437072
						23.0197	0.80965	10.3492	0.0966257	1.25092	13.6429	0.073298				2.10571	23.6282	0.0423223	2.11798	22.7492	0.0439577
						23.1031	0.85763	10.9625	0.09122	1.26762	13.8251	0.0723323				2.13659	23.9747	0.0417106	2.08292	22.3726	0.0446976
						23.1864	0.85375	10.9129	0.0916346	1.23198	13.4364	0.0744248				2.12538	23.8489	0.0419306	2.05735	22.0979	0.0452531
						23.2697	0.85166	10.8862	0.0918594	1.20532	13.1456	0.076071				2.11022	23.6788	0.0422318	2.12202	22.7925	0.043874
						23.3531	0.87032	11.1247	0.0898899	1.19277	13.0087	0.0768714				2.08534	23.3997	0.0427357	2.11758	22.7449	0.043966
						23.4364	0.85474	10.9256	0.0915284	1.20207	13.1102	0.0762767				2.11642	23.7484	0.0421081	2.1129	22.6946	0.0440634
						23.5197	0.83059	10.6169	0.0941897	1.21546	13.2562	0.0754364				2.08239	23.3666	0.0427962	2.07423	22.2792	0.0448848
						23.6031	0.83308	10.6487	0.0939081	1.21733	13.2766	0.0753205				2.08869	23.4372	0.0426671	2.08509	22.3959	0.0446511
						23.6864	0.84744	10.8323	0.0923169	1.20177	13.1069	0.0762957				2.22392	24.9547	0.0400727	2.08148	22.3571	0.0447285
						23.7697	0.84469	10.7971	0.0926174	1.22605	13.3717	0.0747848				2.08541	23.4004	0.0427342	2.11045	22.6683	0.0441145
						23.8531	0.85114	10.8796	0.0919155	1.2175	13.2785	0.07531				2.0792	23.3308	0.0428619	2.09194	22.4695	0.0445049
						23.9364	0.81517	10.4198	0.0959714	1.23474	13.4665	0.0742585				2.09625	23.5221	0.0425132	2.09459	22.4979	0.0444486
						24.0197	0.82976	10.6063	0.0942839	1.22365	13.3455	0.0749315				2.06571	23.1794	0.0431418	2.05075	22.027	0.0453988
						24.1031	0.84258	10.7701	0.0928493	1.19417	13.024	0.0767813				2.07761	23.3129	0.0428947	2.10321	22.5905	0.0442664
						24.1864	0.86293	11.0303	0.0906597	1.21977	13.3032	0.0751698				2.0738	23.2702	0.0429735	2.07924	22.333	0.0447767
						24.2697	0.84356	10.7827	0.0927415	1.17074	12.7685	0.0783179				2.05463	23.0551	0.0433744	2.07843	22.3243	0.0447941
						24.3531	0.81559	10.4251	0.095922	1.17958	12.8649	0.077731				2.09638	23.5235	0.0425106	2.10702	22.6314	0.0441863
						24.4364	0.8386	10.7193	0.09329	1.17647	12.831	0.0779365				2.06766	23.2013	0.0431011	2.00882	21.5767	0.0463464
						24.5197	0.8195	10.4751	0.0954643	1.17753	12.8425	0.0778663				2.08671	23.415	0.0427076	2.05643	22.088	0.0452734
						24.6031	0.83252	10.6415	0.0939713	1.13753	12.4063	0.0806044				2.06342	23.1537	0.0431897	2.02898	21.7932	0.0458859
						24.6864	0.82607	10.5591	0.094705	1.16815	12.7402	0.0784915				2.09352	23.4914	0.0425687	1.99775	21.4578	0.0466032
						24.7697	0.83719	10.7012	0.0934471	1.22258	13.3339	0.0749971				2.05068	23.0107	0.043458	2.05646	22.0884	0.0452727
						24.8531	0.82433	10.5369	0.094905	1.17211	12.7834	0.0782264				2.04878	22.9894	0.0434983	2.03788	21.8888	0.0456855
						24.9364	0.82821	10.5865	0.0944603	1.18696	12.9454	0.0772477				2.05859	23.0995	0.043291	2.07353	22.2717	0.0449
						25.0197	0.89196	11.4013	0.0877091	1.16933	12.7531	0.0784123				2.02947	22.7727	0.0439122	2.04164	21.9292	0.0456013
						25.1031	0.81279	10.3893	0.0962524	1.13149	12.3404	0.0810347				2.05312	23.0381	0.0434063	2.06959	22.2294	0.0449855
						25.1864	0.79458	10.1566	0.0984583	1.17299	12.793	0.0781677				2.04638	22.9625	0.0435493	1.96382	21.0933	0.0474084
						25.2697	0.7733	9.88458	0.101168	1.2015	13.104	0.0763129				2.02793	22.7555	0.0439455	1.96937	21.1529	0.0472748
						25.3531	0.79413	10.1508	0.0985141	1.18195	12.8907	0.0775751				2.00189	22.4633	0.0445171	2.00354	21.52	0.0464685
						25.4364	0.80873	10.3375	0.0967356	1.15948	12.6457	0.0790785				2.03	22.7787	0.0439007	1.95741	21.0245	0.0475636
						25.5197	0.79137	10.1156	0.0988577	1.17551	12.8205	0.0780001				2.02625	22.7366	0.0439819	1.99853	21.4661	0.046585
						25.6031	0.78369	10.0174	0.0998265	1.17643	12.8305	0.0779391				2.01428	22.6023	0.0442433	2.0154	21.6473	0.046195
						25.6864	0.77106	9.85594	0.101462	1.1854	12.9284	0.0773493				1.99667	22.4047	0.0446335	1.96577	21.1143	0.0473613
						25.7697	0.76948	9.83575	0.10167	1.15234	12.5678	0.0795684				2.04667	22.9657	0.0435431	1.98254	21.2944	0.0469607
						25.8531	0.78743	10.0652	0.0993523	1.13586	12.3881	0.0807229				1.99307	22.3643	0.0447141	1.96681	21.1254	0.0473363
						25.9364	0.76043	9.72007	0.10288	1.19239	13.0046	0.0768959				2.01331	22.5914	0.0442646	1.94287	20.8683	0.0479196
						26.0197	0.78409	10.0225	0.0997755	1.17253	12.788	0.0781983				1.98566	22.2811	0.044881	1.95772	21.0278	0.0475561
						26.1031	0.79076	10.1078	0.0989339	1.11955	12.2102	0.0818989				2.04265	22.9206	0.0436288	1.89954	20.4029	0.0490127
						26.1864	0.77909	9.95859	0.100416	1.16476	12.7033	0.07872				1.99549	22.3914	0.0446599	1.93623	20.797	0.0480839
						26.2697	0.76433	9.76992	0.102355	1.13852	12.4171	0.0805343				2.01399	22.599	0.0442497	1.96777	21.1357	0.0473132
						26.3531	0.77169	9.864	0.101379	1.12748	12.2967	0.0813229				2.0049	22.497	0.0444503	1.97677	21.2324	0.0470978
						26.4364	0.74032	9.46301	0.105675	1.125	12.2696	0.0815021				1.99693	22.4076	0.0446277	1.92538	20.6804	0.0483549
						26.5197	0.71847	9.18372	0.108888	1.15116	12.5549	0.07965				2.00545	22.5032	0.0444381	1.94284	20.868	0.0479203
						26.6031	0.78714	10.0615	0.0993889	1.14719	12.5116	0.0799256				1.99416	22.3765	0.0446897	1.91128	20.529	0.0487116
						26.6864	0.73809	9.43451	0.105994	1.15183	12.5622	0.0796037				1.98721	22.2985	0.044846	1.93108	20.7417	0.0482121
						26.7697	0.75694	9.67546	0.103354	1.15775	12.6268	0.0791966				2.01627	22.6246	0.0441996	1.9185	20.6065	0.0485283
						26.8531	0.78302	10.0088	0.0999119	1.1494	12.5357	0.079772				1.97299	22.139	0.0451692	1.92421	20.6679	0.0483843
						26.9364	0.77722	9.93468	0.100657	1.14614	12.5002	0.0799989				1.98206	22.2407	0.0449625	1.90281	20.438	0.0489284
						27.0197	0.79839	10.2053	0.0979885	1.11706	12.183	0.0820814				1.92999	21.6565	0.0461756	1.91985	20.621	0.0484942
						27.1031	0.75447	9.64388	0.103693	1.14349	12.4713	0.0801843				1.98366	22.2587	0.0449262	1.91664	20.5866	0.0485754
						27.1864	0.69142	8.83796	0.113148	1.14579	12.4964	0.0800233				1.95223	21.906	0.0456495	1.89711	20.3768	0.0490754
						27.2697	0.72925	9.32151	0.107279	1.11439	12.1539	0.0822781				1.96472	22.0462	0.0453593	1.90463	20.4576	0.0488817
						27.3531	0.74009	9.46007	0.105707	1.16269	12.6807	0.0788601				1.97692	22.1831	0.0450794	1.9024	20.4336	0.048939
						27.4364	0.73729	9.42428	0.106109	1.12089	12.2248	0.081801				1.96867	22.0905	0.0452683	1.87384	20.1269	0.0496849
						27.5197	0.73734	9.42492	0.106102	1.19008	12.9794	0.0770452				1.94019	21.7709	0.0459328	1.88744	20.2729	0.0493269
						27.6031	0.74849	9.56745	0.104521	1.14253	12.4608	0.0802516				1.95166	21.8996	0.0456629	1.87294	20.1172	0.0497087
						27.6864	0.73715	9.42249	0.106129	1.12779	12.3	0.0813005				1.97026	22.1083	0.0452318	1.89152	20.3168	0.0492205
						27.7697	0.73105	9.34452	0.107015	1.12853	12.3081	0.0812472				1.95365	21.922	0.0456164	1.88385	20.2344	0.0494209
						27.8531	0.75173	9.60886	0.104071	1.15637	12.6117	0.0792911				1.95316	21.9165	0.0456278	1.89989	20.4067	0.0490036
						27.9364	0.75368	9.63379	0.103801	1.14105	12.4447	0.0803557				1.94646	21.8413	0.0457849	1.83181	19.6754	0.0508249
						28.0197	0.69245	8.85112	0.11298	1.14145	12.449	0.0803276				2.01839	22.6484	0.0441532	1.86354	20.0162	0.0499595
						28.1031	0.71641	9.15739	0.109201	1.12627	12.2835	0.0814102				1.96564	22.0565	0.0453381	1.89307	20.3334	0.0491802
						28.1864	0.69527	8.88717	0.112522	1.13069	12.3317	0.081092				1.94882	21.8678	0.0457294	1.91022	20.5176	0.0487386
						28.2697	0.72258	9.23626	0.108269	1.13778	12.409	0.0805867				1.9608	22.0022	0.04545	1.90018	20.4098	0.0489961
						28.3531	0.72003	9.20366	0.108652	1.10273	12.0267	0.0831481				2.05357	23.0432	0.0433968	1.86247	20.0047	0.0499882
						28.4364	0.68093	8.70387	0.114891	1.14393	12.4761	0.0801534				1.93092	21.6669	0.0461533	1.89785	20.3847	0.0490563
						28.5197	0.69746	8.91516	0.112168	1.11334	12.1424	0.0823557				1.94199	21.7911	0.0458902	1.91767	20.5976	0.0485493
						28.6031	0.67915	8.68112	0.115193	1.12787	12.3009	0.0812947				1.91869	21.5297	0.0464475	1.8574	19.9503	0.0501246
						28.6864	0.68873	8.80357	0.11359	1.11285	12.1371	0.082392				1.9188	21.5309	0.0464449	1.88405	20.2365	0.0494156
						28.7697	0.71226	9.10434	0.109838	1.1636	12.6906	0.0787985				1.92301	21.5781	0.0463432	1.84398	19.8061	0.0504894
						28.8531	0.69232	8.84946	0.113001	1.14631	12.502	0.079987				1.90508	21.377	0.0467793	1.84664	19.8347	0.0504167
						28.9364	0.68719	8.78389	0.113845	1.15437	12.5899	0.0794285				1.92728	21.6261	0.0462405	1.83114	19.6682	0.0508435
						29.0197	0.70889	9.06127	0.11036	1.11653	12.1772	0.0821204				1.92297	21.5777	0.0463441	1.84467	19.8135	0.0504705
						29.1031	0.72745	9.29851	0.107544	1.14428	12.4799	0.0801289				1.91848	21.5273	0.0464526	1.83991	19.7624	0.0506011
						29.1864	0.69751	8.9158	0.11216	1.1253	12.2729	0.0814804				1.91133	21.4471	0.0466264	1.83579	19.7182	0.0507147
						29.2697	0.69356	8.86531	0.112799							1.91634	21.5033	0.0465045	1.81801	19.5272	0.0512107
						29.3531	0.69927	8.9383	0.111878							1.89858	21.304	0.0469395	1.78869	19.2123	0.0520501
						29.4364	0.68082	8.70247	0.11491							1.88117	21.1087	0.0473739	1.84107	19.7749	0.0505692
						29.5197	0.67916	8.68125	0.115191							1.91794	21.5213	0.0464657	1.80836	19.4235	0.0514839
						29.6031	0.68826	8.79757	0.113668							1.92561	21.6073	0.0462806	1.80264	19.3621	0.0516473
						29.6864	0.67436	8.61989	0.116011							1.92007	21.5452	0.0464141	1.81294	19.4727	0.0513539
						29.7697	0.69726	8.91261	0.112201							1.93063	21.6637	0.0461603	1.77757	19.0928	0.0523757
						29.8531	0.69149	8.83885	0.113137							1.90302	21.3538	0.04683	1.83161	19.6733	0.0508304
						29.9364	0.66096	8.44861	0.118363							1.86063	20.8782	0.0478969	1.81203	19.463	0.0513797
						30.0197										1.92657	21.6181	0.0462575	1.76882	18.9988	0.0526348
						30.1031										1.89402	21.2529	0.0470525	1.79161	19.2436	0.0519653
						30.1864										1.89359	21.248	0.0470632	1.79796	19.3118	0.0517817
						30.2697										1.90189	21.3412	0.0468578	1.78225	19.1431	0.0522382
						30.3531										1.87466	21.0356	0.0475384	1.77622	19.0783	0.0524155
						30.4364										1.91816	21.5237	0.0464604	1.82635	19.6168	0.0509768
						30.5197										1.87129	20.9978	0.047624	1.78223	19.1429	0.0522388
						30.6031										1.88493	21.1509	0.0472794	1.77187	19.0316	0.0525442
						30.6864										1.87365	21.0243	0.0475641	1.78768	19.2014	0.0520795
						30.7697										1.87547	21.0447	0.0475179	1.71848	18.4581	0.0541767
						30.8531										1.87735	21.0658	0.0474703	1.76658	18.9748	0.0527015
						30.9364										1.88613	21.1643	0.0472493	1.70299	18.2918	0.0546694
						31.0197										1.8602	20.8734	0.047908	1.74798	18.775	0.0532623
						31.1031										1.8888	21.1943	0.0471825	1.74737	18.7684	0.0532809
						31.1864										1.87267	21.0133	0.047589	1.72976	18.5793	0.0538234
						31.2697										1.88955	21.2027	0.0471638	1.71754	18.448	0.0542063
						31.3531										1.86387	20.9145	0.0478136	1.69529	18.2091	0.0549177
						31.4364										1.87371	21.025	0.0475625	1.71778	18.4506	0.0541987
						31.5197										1.85746	20.8426	0.0479786	1.78257	19.1465	0.0522288
						31.6031										1.89727	21.2893	0.0469719	1.65219	17.7461	0.0563504
						31.6864										1.87556	21.0457	0.0475156	1.721	18.4852	0.0540973
						31.7697										1.89131	21.2224	0.0471199	1.72636	18.5428	0.0539294
						31.8531										1.85572	20.8231	0.0480236	1.71079	18.3755	0.0544202
						31.9364										1.85974	20.8682	0.0479198	1.70507	18.3141	0.0546027
						32.0197										1.8225	20.4503	0.048899	1.73809	18.6688	0.0535654
						32.1031										1.85923	20.8625	0.047933	1.70566	18.3204	0.0545839
						32.1864										1.85942	20.8646	0.0479281	1.65184	17.7424	0.0563623
						32.2697										1.8378	20.622	0.0484919	1.68219	18.0683	0.0553454
						32.3531										1.86251	20.8993	0.0478485	1.66777	17.9135	0.0558239
						32.4364										1.86121	20.8847	0.047882	1.698	18.2382	0.0548301
						32.5197										1.8286	20.5188	0.0487359	1.67001	17.9375	0.0557491
						32.6031										1.88785	21.1836	0.0472063	1.67686	18.0111	0.0555213
						32.6864										1.86652	20.9443	0.0477458	1.68061	18.0514	0.0553974
						32.7697										1.8801	21.0967	0.0474009	1.65784	17.8068	0.0561583
						32.8531										1.84856	20.7427	0.0482096	1.68477	18.0961	0.0552607
						32.9364										1.84094	20.6572	0.0484092	1.66886	17.9252	0.0557875
						33.0197										1.88089	21.1055	0.047381	1.67152	17.9537	0.0556987
						33.1031										1.83851	20.63	0.0484732	1.65394	17.7649	0.0562907
						33.1864										1.85783	20.8468	0.0479691	1.67298	17.9694	0.0556501
						33.2697										1.86104	20.8828	0.0478863	1.66331	17.8656	0.0559736
						33.3531										1.84582	20.712	0.0482812	1.64686	17.6889	0.0565327
						33.4364										1.83797	20.6239	0.0484874	1.65377	17.7631	0.0562965
						33.5197										1.84661	20.7209	0.0482605	1.64386	17.6566	0.0566359
						33.6031										1.86256	20.8998	0.0478473	1.61336	17.329	0.0577066
						33.6864										1.83201	20.557	0.0486451	1.64488	17.6676	0.0566008
						33.7697										1.82746	20.506	0.0487663	1.65981	17.828	0.0560917
						33.8531										1.81477	20.3636	0.0491073	1.61679	17.3659	0.0575842
						33.9364										1.79558	20.1483	0.0496321	1.62314	17.4341	0.0573589
						34.0197										1.83585	20.6001	0.0485434	1.63434	17.5544	0.0569658
						34.1031										1.82573	20.4866	0.0488125	1.63644	17.5769	0.0568927
						34.1864										1.82509	20.4794	0.0488296	1.60129	17.1994	0.0581416
						34.2697										1.84034	20.6505	0.048425	1.59894	17.1742	0.058227
						34.3531										1.81369	20.3515	0.0491365	1.57867	16.9564	0.0589746
						34.4364										1.81897	20.4107	0.0489939	1.60918	17.2841	0.0578565
						34.5197										1.83223	20.5595	0.0486393	1.58073	16.9786	0.0588978
						34.6031										1.81379	20.3526	0.0491338	1.58789	17.0555	0.0586322
						34.6864										1.80067	20.2054	0.0494918	1.613	17.3252	0.0577195
						34.7697										1.81698	20.3884	0.0490475	1.57604	16.9282	0.0590731
						34.8531										1.82722	20.5033	0.0487727	1.59377	17.1186	0.0584159
						34.9364										1.8302	20.5367	0.0486933	1.56012	16.7572	0.0596759
						35.0197										1.81727	20.3916	0.0490397	1.59068	17.0854	0.0585294
						35.1031										1.81653	20.3833	0.0490597	1.55105	16.6598	0.0600248
						35.1864										1.79579	20.1506	0.0496263	1.61857	17.385	0.0575208
						35.2697										1.78846	20.0684	0.0498297	1.60724	17.2633	0.0579263
						35.3531										1.79301	20.1194	0.0497032	1.57252	16.8904	0.0592053
						35.4364										1.81091	20.3203	0.0492119	1.57732	16.9419	0.0590251
						35.5197										1.75854	19.7326	0.0506775	1.59906	17.1754	0.0582226
						35.6031										1.77942	19.9669	0.0500828	1.56399	16.7988	0.0595282
						35.6864										1.77402	19.9063	0.0502353	1.58229	16.9953	0.0588397
						35.7697										1.78134	19.9885	0.0500289	1.57588	16.9265	0.0590791
						35.8531										1.78253	20.0018	0.0499955	1.58933	17.0709	0.0585791
						35.9364										1.77005	19.8618	0.050348	1.59848	17.1692	0.0582438
						36.0197										1.79377	20.1279	0.0496822	1.57596	16.9273	0.0590761
						36.1031										1.75519	19.695	0.0507742	1.55868	16.7417	0.059731
						36.1864										1.79078	20.0944	0.0497651	1.53205	16.4557	0.0607692
						36.2697										1.79168	20.1045	0.0497401	1.54415	16.5857	0.060293
						36.3531										1.77176	19.881	0.0502994	1.50868	16.2047	0.0617106
						36.4364										1.78626	20.0437	0.0498911	1.58327	17.0058	0.0588033
						36.5197										1.76907	19.8508	0.0503758	1.57239	16.889	0.0592102
						36.6031										1.78745	20.057	0.0498578	1.53161	16.451	0.0607867
						36.6864										1.77377	19.9035	0.0502424	1.57864	16.9561	0.0589758
						36.7697										1.75239	19.6636	0.0508553	1.53297	16.4656	0.0607328
						36.8531										1.77623	19.9311	0.0501728	1.57057	16.8694	0.0592788
						36.9364										1.76715	19.8292	0.0504306	1.54798	16.6268	0.0601439
						37.0197										1.75524	19.6956	0.0507728	1.50028	16.1145	0.0620561
						37.1031										1.74903	19.6259	0.050953	1.51267	16.2475	0.0615478
						37.1864										1.748	19.6144	0.0509831	1.50876	16.2055	0.0617073
						37.2697										1.75835	19.7305	0.050683	1.5285	16.4176	0.0609104
						37.3531										1.72296	19.3334	0.051724	1.5242	16.3714	0.0610822
						37.4364										1.74528	19.5838	0.0510625	1.5089	16.207	0.0617016
						37.5197										1.74869	19.6221	0.0509629	1.46804	15.7682	0.0634189
						37.6031										1.74295	19.5577	0.0511308	1.54291	16.5723	0.0603415
						37.6864										1.73377	19.4547	0.0514015	1.50976	16.2163	0.0616664
						37.7697										1.7322	19.4371	0.0514481	1.50317	16.1455	0.0619368
						37.8531										1.73362	19.453	0.051406	1.52692	16.4006	0.0609734
						37.9364										1.72006	19.3008	0.0518112	1.47125	15.8026	0.0632805
						38.0197										1.70524	19.1345	0.0522615	1.50345	16.1485	0.0619252
						38.1031										1.72629	19.3707	0.0516242	1.48422	15.942	0.0627276
						38.1864										1.68989	18.9623	0.0527362	1.47183	15.8089	0.0632556
						38.2697										1.73011	19.4136	0.0515103	1.51081	16.2276	0.0616236
						38.3531										1.76337	19.7868	0.0505387	1.51648	16.2885	0.0613932
						38.4364										1.69267	18.9935	0.0526496	1.50258	16.1392	0.0619611
						38.5197										1.70126	19.0899	0.0523838	1.47886	15.8844	0.0629549
						38.6031										1.67077	18.7478	0.0533397	1.46831	15.7711	0.0634073
						38.6864										1.89411	21.2539	0.0470503	1.47524	15.8455	0.0631094
						38.7697										1.69607	19.0316	0.0525441	1.50857	16.2035	0.0617151
						38.8531										1.65348	18.5537	0.0538975	1.49514	16.0592	0.0622694
						38.9364										1.72884	19.3994	0.0515481	1.46563	15.7423	0.0635232
						39.0197										1.67377	18.7814	0.0532441	1.47747	15.8695	0.0630141
						39.1031										1.89038	21.212	0.0471431	1.44344	15.5039	0.0644997
						39.1864										1.69224	18.9887	0.052663	1.46716	15.7587	0.063457
						39.2697										1.64529	18.4618	0.0541658	1.47587	15.8523	0.0630825
						39.3531										1.67041	18.7437	0.0533512	1.49152	16.0204	0.0624206
						39.4364										1.6763	18.8098	0.0531638	1.43391	15.4016	0.0649284
						39.5197										1.67495	18.7947	0.0532066	1.48677	15.9693	0.06262
						39.6031										1.65113	18.5274	0.0539742	1.43407	15.4033	0.0649212
						39.6864										1.67854	18.8349	0.0530928	1.46204	15.7037	0.0636792
						39.7697										1.87461	21.0351	0.0475397	1.43222	15.3834	0.065005
						39.8531										1.67207	18.7623	0.0532982	1.4399	15.4659	0.0646583
						39.9364										1.6778	18.8266	0.0531162	1.44888	15.5624	0.0642576

## Sheet: Sup. Figure 6
(-)-NME	ZnMe2
Benzaldehyde	(1.2M/Toluene)	Ligand	Toluene	T°	Ligand ee [%]	reaction time	Cat. loading [mol%]	Experiment	Area H-Benz	Area R-Product	Area S-Product	Product ee	Mean Product ee	st. deviation	Conversion	Mean Conversion	st. deviation
51 µL	0.50 mL	17.9 mg	0.10 mL	0 °C	100	4 days	20	603 A	50088	13130	16707	-0.119885			0.335225				alc/Benz response ratio
500 µmol	0.60 mmol	100 µmol			(-)-NME			603 B	57817	17125	22024	-0.125137			0.364352				1.1813
0.83M					0.833 M			603 C	60191	19110	25016	-0.133844	-0.126289	0.00575671	0.38294	0.360839	0.0196373
53 µL	0.50 mL	14.0 mg	0.13 mL			4 days	15	602 M	63789	18220	23674	-0.130186			0.357311
522 µmol	0.60 mmol	78.3 µmol						602 N	55594	14491	18647	-0.125415			0.335367
0.83M								602 O	55372	17723	22371	-0.115928	-0.123843	0.00592607	0.38002	0.357566	0.0182305
55 µL	0.50 mL	9.8 mg	0.15 mL			4 days	10	602 P	70753	23293	27541	-0.0835661			0.378188
545 µmol	0.60 µmol	54.6 µmol						602 Q	58264	17551	20826	-0.0853376			0.35798
0.83M								602 R	60744	18013	21041	-0.0775337	-0.0821458	0.00334048	0.352438	0.362869	0.0110662
116 µL	1.0 mL	10.2 mg	0.37 mL			4 days	5	602 S	64547	29127	28862	0.00456983			0.431985
1.14 mmol	1.2 mmol	57.1 µmol						602 T	64617	30392	29884	0.0084279			0.441233
0.83M								602 U	55523	29946	29856	0.00150497	0.00483423	0.00153243	0.476923	0.450047	0.0193755
178 µL	1.5 mL	7.8 mg	0.61 mL			4 days	2.5	602 V	91367	42170	35198	0.0901148			0.417529
1.76 mmol	1.8 mmol	44 µmol						602 W	71033	34266	28024	0.100209			0.426056
0.83M								602 X	72479	32644	26325	0.107158	0.0991605	0.00852161	0.40784	0.417142	0.00744173
							Cat. loading [mol%]	Product ee [%]	st. Deviation
							20	-12.6289	0.575671
							15	-12.3843	0.592607
							10	-8.21458	0.334048
							5	0.483423	0.153243
							2.5	9.91605	0.852161

## Sheet: GC Calibration curve
Experiment	Area H-Benz	Area R-Product	Area S-Product	Area R + S	conc. Benz [mol/L]	conc. Product [mol/L]
637 H A	297729	132933	132326	265259	0.0319638	0.0240648
637 H B	143276	62788	63743	126531	0.0143837	0.0108292
637 H C	54626	24052	24168	48220	0.00575349	0.00433167
637 H D	35540	15859	15730	31589	0.00359593	0.00270729
637 H E	29535	13056	13112	26168	0.00287674	0.00216583
					Product/Benzaldehyde response ratio:		1.18126
