# Supplementary material for: Hyperpositive non-linear effects: enantiodivergence and modelling
Source: Royal Society of Chemistry journal article supplement (doi:10.1039/d0sc04724d), 2020-01-01
Supplement: d0sc04724d3.xlsx [file d0sc04724d3.xlsx]

## Sheet: Fig. 8a kobs=f(Ctot)
	[Cattot]	kobs	kobs/[Cattot]	[R]		Constant	value				k1 = 2.5, k2 = 5	k1 = 2.5, k2 = 0.25	k1 = 2.5, k2 = 10	k1 = 3, k2 = 3
-5	1e-05	2.54809e-05	2.54809	0.980762		KHomo	1000				kobs/[Cattot]	kobs/[Cattot]	kobs/[Cattot]	kobs/[Cattot]
-4.9	1.25893e-05	3.2228e-05	2.55996	0.976015		k1	2.5				2.5	2.45431	2.54809	0.990381
-4.8	1.58489e-05	4.08044e-05	2.57459	0.970165		k2	10				2.5	2.44304	2.55996	0.988007
-4.7	1.99526e-05	5.17275e-05	2.59252	0.962994		[Sub]0	0.833				2.5	2.42914	2.57459	0.985083
-4.6	2.51189e-05	6.56699e-05	2.61437	0.954254							2.5	2.41211	2.59252	0.981497
-4.5	3.16228e-05	8.35096e-05	2.6408	0.943678							2.5	2.39135	2.61437	0.977127
-4.4	3.98107e-05	0.000106395	2.67253	0.930989							2.5	2.36624	2.6408	0.971839
-4.3	5.01187e-05	0.000135833	2.71022	0.915911							2.5	2.3361	2.67253	0.965494
-4.2	6.30957e-05	0.000173798	2.75451	0.898195							2.5	2.30029	2.71022	0.957956
-4.1	7.94328e-05	0.000222882	2.80591	0.877635							2.5	2.25821	2.75451	0.949097
-4	0.0001	0.000286475	2.86475	0.854102							2.5	2.20938	2.80591	0.938817
-3.9	0.000125893	0.000369003	2.93109	0.827563							2.5	2.15349	2.86475	0.927051
-3.8	0.000158489	0.000476222	3.00476	0.798097							2.5	2.09046	2.93109	0.913781
-3.7	0.000199526	0.000615584	3.08523	0.765909							2.5	2.02048	3.00476	0.899049
-3.6	0.000251189	0.000796697	3.17171	0.731317							2.5	1.94403	3.08523	0.882955
-3.5	0.000316228	0.0010319	3.26315	0.694738							2.5	1.86188	3.17171	0.865658
-3.4	0.000398107	0.00133698	3.35834	0.656665							2.5	1.775	3.26315	0.847369
-3.3	0.000501187	0.00173207	3.45593	0.617629							2.5	1.68458	3.35834	0.828333
-3.2	0.000630957	0.00224279	3.55458	0.578169							2.5	1.59187	3.45593	0.808814
-3.1	0.000794328	0.00290168	3.653	0.538802							2.5	1.49815	3.55458	0.789084
-3	0.001	0.00375	3.75	0.5							2.5	1.40465	3.653	0.769401
-2.9	0.00125893	0.00484002	3.84456	0.462174							2.5	1.3125	3.75	0.75
-2.8	0.00158489	0.00623788	3.93584	0.425665							2.5	1.22266	3.84456	0.731087
-2.7	0.00199526	0.00802724	4.02315	0.390739							2.5	1.13595	3.93584	0.712832
-2.6	0.00251189	0.0103138	4.10602	0.357594							2.5	1.05301	4.02315	0.695369
-2.5	0.00316228	0.0132313	4.1841	0.326361							2.5	0.974285	4.10602	0.678797
-2.4	0.00398107	0.0169483	4.25721	0.297116							2.5	0.900108	4.1841	0.663181
-2.3	0.00501187	0.0216778	4.32529	0.269886							2.5	0.830652	4.25721	0.648558
-2.2	0.00630957	0.0276887	4.38836	0.244657							2.5	0.765979	4.32529	0.634943
-2.1	0.00794328	0.0353201	4.44654	0.221384							2.5	0.70606	4.38836	0.622328
-2	0.01	0.045	4.5	0.2							2.5	0.650787	4.44654	0.610692
-1.9	0.0125893	0.0572679	4.54895	0.180419							2.5	0.6	4.5	0.6
-1.8	0.0158489	0.0728044	4.59364	0.162542							2.5	0.553494	4.54895	0.590209
-1.7	0.0199526	0.0924671	4.63433	0.146267							2.5	0.511038	4.59364	0.581271
-1.6	0.0251189	0.117337	4.67129	0.131484							2.5	0.472384	4.63433	0.573133
-1.5	0.0316228	0.148778	4.70479	0.118086							2.5	0.437275	4.67129	0.565742
-1.4	0.0398107	0.188507	4.73509	0.105965							2.5	0.405454	4.70479	0.559043
-1.3	0.0501187	0.238688	4.76246	0.0950178							2.5	0.376667	4.73509	0.552982
-1.2	0.0630957	0.302048	4.78714	0.0851454							2.5	0.350667	4.76246	0.547509
-1.1	0.0794328	0.382021	4.80937	0.0762538							2.5	0.32722	4.78714	0.542573
-1	0.1	0.482936	4.82936	0.0682549							2.5	0.306103	4.80937	0.538127
-0.9	0.125893	0.610243	4.84733	0.0610664							2.5	0.287105	4.82936	0.534127
-0.8	0.158489	0.770808	4.86347	0.0546122							2.5	0.270033	4.84733	0.530533
-0.7	0.199526	0.973278	4.87794	0.048822							2.5	0.254704	4.86347	0.527306
-0.6	0.251189	1.22854	4.89092	0.0436313							2.5	0.240952	4.87794	0.524411
-0.5	0.316228	1.55032	4.90255	0.0389808							2.5	0.228624	4.89092	0.521816
-0.4	0.398107	1.95588	4.91296	0.0348169							2.5	0.217579	4.90255	0.51949
-0.3	0.501187	2.46698	4.92227	0.0310904							2.5	0.20769	4.91296	0.517408
-0.2	0.630957	3.111	4.93061	0.027757							2.5	0.19884	4.92227	0.515545
-0.1	0.794328	3.92244	4.93806	0.0247763							2.5	0.190923	4.93061	0.513878
0	1	4.94472	4.94472	0.0221121							2.5	0.183844	4.93806	0.512388
0.1											2.5	0.177516	4.94472	0.511056
0.2
0.3
0.4
0.5
0.6
0.7
0.8
0.9
1

## Sheet: Fig. 8b kobs vs eeL
kobs	eeL	beta	alpha			Constant	value					KHomo	30	k1	2.5	KHomo	30	k1	2.5	KHomo	30	k1	2.5	KHomo	30	k1	2.5
0.0247983	1.15999e-09	2.45254e-05	0.00990462			KHomo	30					KHetero	3000	k2	5	KHetero	3000	k2	25	KHetero	3000	k2	5	KHetero	3000	k2	25
0.0248235	0.00460133	2.45217e-05	0.00991462	-5		KHetero	3000					[Cattot]	0.16	k2'	5	[Cattot]	0.16	k2'	5	[Cattot]	0.16	k2'	25	[Cattot]	0.16	k2'	25
0.0248524	0.00674878	2.45174e-05	0.0099261	-4.94		[Cattot]	0.16					kobs	eeL	beta	alpha	kobs	eeL	beta	alpha	kobs	eeL	beta	alpha	kobs	eeL	beta	alpha
0.0248855	0.00858001	2.45125e-05	0.00993929	-4.88		k1	2.5					0.4	1.15999e-07	2.45254e-05	0.00990462	0.42943	1.15999e-07	2.45254e-05	0.00990462	1.87152	1.15999e-07	2.45254e-05	0.00990462	1.90095	1.15999e-07	2.45254e-05	0.00990462
0.0249236	0.0102936	2.45068e-05	0.00995442	-4.82		k2	0.025					0.4	0.460133	2.45217e-05	0.00991462	0.429554	0.460133	2.45217e-05	0.00991462	1.8713	0.460133	2.45217e-05	0.00991462	1.90085	0.460133	2.45217e-05	0.00991462
0.0249673	0.0119684	2.45003e-05	0.0099718	-4.76		k2'	0					0.4	0.674878	2.45174e-05	0.0099261	0.429696	0.674878	2.45174e-05	0.0099261	1.87104	0.674878	2.45174e-05	0.0099261	1.90074	0.674878	2.45174e-05	0.0099261
0.0250175	0.0136472	2.44929e-05	0.00999175	-4.7		k2/k1	0.01					0.4	0.858001	2.45125e-05	0.00993929	0.429859	0.858001	2.45125e-05	0.00993929	1.87075	0.858001	2.45125e-05	0.00993929	1.90061	0.858001	2.45125e-05	0.00993929
0.0250751	0.0153584	2.44843e-05	0.0100147	-4.64		k2'/k1	0					0.4	1.02936	2.45068e-05	0.00995442	0.430046	1.02936	2.45068e-05	0.00995442	1.87041	1.02936	2.45068e-05	0.00995442	1.90046	1.02936	2.45068e-05	0.00995442
0.0251413	0.0171235	2.44745e-05	0.010041	-4.58		alphamin	0.00990462					0.4	1.19684	2.45003e-05	0.0099718	0.430262	1.19684	2.45003e-05	0.0099718	1.87002	1.19684	2.45003e-05	0.0099718	1.90028	1.19684	2.45003e-05	0.0099718
0.0252173	0.0189604	2.44631e-05	0.0100712	-4.52								0.4	1.36472	2.44929e-05	0.00999175	0.43051	1.36472	2.44929e-05	0.00999175	1.86957	1.36472	2.44929e-05	0.00999175	1.90008	1.36472	2.44929e-05	0.00999175
0.0253045	0.0208855	2.44501e-05	0.0101058	-4.46								0.4	1.53584	2.44843e-05	0.0100147	0.430795	1.53584	2.44843e-05	0.0100147	1.86906	1.53584	2.44843e-05	0.0100147	1.89985	1.53584	2.44843e-05	0.0100147
0.0254047	0.0229145	2.44351e-05	0.0101456	-4.4								0.4	1.71235	2.44745e-05	0.010041	0.431123	1.71235	2.44745e-05	0.010041	1.86847	1.71235	2.44745e-05	0.010041	1.89959	1.71235	2.44745e-05	0.010041
0.0255197	0.0250632	2.44178e-05	0.0101914	-4.34								0.4	1.89604	2.44631e-05	0.0100712	0.431501	1.89604	2.44631e-05	0.0100712	1.86779	1.89604	2.44631e-05	0.0100712	1.89929	1.89604	2.44631e-05	0.0100712
0.0256517	0.0273483	2.4398e-05	0.0102438	-4.28								0.4	2.08855	2.44501e-05	0.0101058	0.431937	2.08855	2.44501e-05	0.0101058	1.867	2.08855	2.44501e-05	0.0101058	1.89894	2.08855	2.44501e-05	0.0101058
0.0258033	0.0297876	2.43751e-05	0.0103041	-4.22								0.4	2.29145	2.44351e-05	0.0101456	0.432438	2.29145	2.44351e-05	0.0101456	1.86611	2.29145	2.44351e-05	0.0101456	1.89854	2.29145	2.44351e-05	0.0101456
0.0259774	0.0324004	2.43487e-05	0.0103733	-4.16								0.4	2.50632	2.44178e-05	0.0101914	0.433017	2.50632	2.44178e-05	0.0101914	1.86507	2.50632	2.44178e-05	0.0101914	1.89809	2.50632	2.44178e-05	0.0101914
0.0261772	0.0352083	2.43183e-05	0.0104527	-4.1								0.4	2.73483	2.4398e-05	0.0102438	0.433684	2.73483	2.4398e-05	0.0102438	1.86388	2.73483	2.4398e-05	0.0102438	1.89756	2.73483	2.4398e-05	0.0102438
0.0264067	0.0382356	2.42833e-05	0.0105439	-4.04								0.4	2.97876	2.43751e-05	0.0103041	0.434455	2.97876	2.43751e-05	0.0103041	1.8625	2.97876	2.43751e-05	0.0103041	1.89696	2.97876	2.43751e-05	0.0103041
0.0266702	0.0415096	2.42428e-05	0.0106486	-3.98								0.4	3.24004	2.43487e-05	0.0103733	0.435344	3.24004	2.43487e-05	0.0103733	1.86092	3.24004	2.43487e-05	0.0103733	1.89627	3.24004	2.43487e-05	0.0103733
0.0269728	0.0450621	2.41961e-05	0.0107689	-3.92								0.4	3.52083	2.43183e-05	0.0104527	0.436373	3.52083	2.43183e-05	0.0104527	1.8591	3.52083	2.43183e-05	0.0104527	1.89547	3.52083	2.43183e-05	0.0104527
0.0273202	0.0489293	2.41421e-05	0.0109069	-3.86								0.4	3.82356	2.42833e-05	0.0105439	0.437565	3.82356	2.42833e-05	0.0105439	1.857	3.82356	2.42833e-05	0.0105439	1.89456	3.82356	2.42833e-05	0.0105439
0.0277192	0.0531538	2.40796e-05	0.0110654	-3.8								0.4	4.15096	2.42428e-05	0.0106486	0.438945	4.15096	2.42428e-05	0.0106486	1.85457	4.15096	2.42428e-05	0.0106486	1.89351	4.15096	2.42428e-05	0.0106486
0.0281772	0.0577854	2.40072e-05	0.0112473	-3.74								0.4	4.50621	2.41961e-05	0.0107689	0.440546	4.50621	2.41961e-05	0.0107689	1.85177	4.50621	2.41961e-05	0.0107689	1.89231	4.50621	2.41961e-05	0.0107689
0.0287032	0.0628827	2.39233e-05	0.0114563	-3.68								0.4	4.89293	2.41421e-05	0.0109069	0.442406	4.89293	2.41421e-05	0.0109069	1.84853	4.89293	2.41421e-05	0.0109069	1.89093	4.89293	2.41421e-05	0.0109069
0.0293073	0.0685155	2.38258e-05	0.0116962	-3.62								0.4	5.31538	2.40796e-05	0.0110654	0.44457	5.31538	2.40796e-05	0.0110654	1.84478	5.31538	2.40796e-05	0.0110654	1.88935	5.31538	2.40796e-05	0.0110654
0.0300009	0.0747669	2.37125e-05	0.0119716	-3.56								0.4	5.77854	2.40072e-05	0.0112473	0.447093	5.77854	2.40072e-05	0.0112473	1.84043	5.77854	2.40072e-05	0.0112473	1.88753	5.77854	2.40072e-05	0.0112473
0.0307974	0.081737	2.35804e-05	0.0122878	-3.5								0.4	6.28827	2.39233e-05	0.0114563	0.45004	6.28827	2.39233e-05	0.0114563	1.8354	6.28827	2.39233e-05	0.0114563	1.88544	6.28827	2.39233e-05	0.0114563
0.0317121	0.0895461	2.34263e-05	0.0126509	-3.44								0.4	6.85155	2.38258e-05	0.0116962	0.453489	6.85155	2.38258e-05	0.0116962	1.82955	6.85155	2.38258e-05	0.0116962	1.88304	6.85155	2.38258e-05	0.0116962
0.0327626	0.0983403	2.3246e-05	0.0130678	-3.38								0.4	7.47669	2.37125e-05	0.0119716	0.457536	7.47669	2.37125e-05	0.0119716	1.82275	7.47669	2.37125e-05	0.0119716	1.88028	7.47669	2.37125e-05	0.0119716
0.033969	0.108298	2.30346e-05	0.0135464	-3.32								0.4	8.1737	2.35804e-05	0.0122878	0.462298	8.1737	2.35804e-05	0.0122878	1.81482	8.1737	2.35804e-05	0.0122878	1.87712	8.1737	2.35804e-05	0.0122878
0.0353547	0.119636	2.27861e-05	0.0140959	-3.26								0.4	8.95461	2.34263e-05	0.0126509	0.467915	8.95461	2.34263e-05	0.0126509	1.80558	8.95461	2.34263e-05	0.0126509	1.87349	8.95461	2.34263e-05	0.0126509
0.0369461	0.132622	2.24932e-05	0.0147269	-3.2								0.4	9.83403	2.3246e-05	0.0130678	0.474565	9.83403	2.3246e-05	0.0130678	1.79476	9.83403	2.3246e-05	0.0130678	1.86932	9.83403	2.3246e-05	0.0130678
0.0387741	0.147588	2.2147e-05	0.0154513	-3.14								0.4	10.8298	2.30346e-05	0.0135464	0.482461	10.8298	2.30346e-05	0.0135464	1.78207	10.8298	2.30346e-05	0.0135464	1.86454	10.8298	2.30346e-05	0.0135464
0.040874	0.164942	2.17362e-05	0.0162831	-3.08								0.4	11.9636	2.27861e-05	0.0140959	0.491874	11.9636	2.27861e-05	0.0140959	1.76717	11.9636	2.27861e-05	0.0140959	1.85904	11.9636	2.27861e-05	0.0140959
0.0432862	0.185194	2.12471e-05	0.0172381	-3.02								0.4	13.2622	2.24932e-05	0.0147269	0.503137	13.2622	2.24932e-05	0.0147269	1.74959	13.2622	2.24932e-05	0.0147269	1.85273	13.2622	2.24932e-05	0.0147269
0.0460575	0.208982	2.06626e-05	0.0183346	-2.96								0.4	14.7588	2.2147e-05	0.0154513	0.51667	14.7588	2.2147e-05	0.0154513	1.72882	14.7588	2.2147e-05	0.0154513	1.84549	14.7588	2.2147e-05	0.0154513
0.0492417	0.237105	1.99613e-05	0.0195935	-2.9								0.4	16.4942	2.17362e-05	0.0162831	0.533	16.4942	2.17362e-05	0.0162831	1.70417	16.4942	2.17362e-05	0.0162831	1.83717	16.4942	2.17362e-05	0.0162831
0.0529006	0.27057	1.91161e-05	0.0210389	-2.84								0.4	18.5194	2.12471e-05	0.0172381	0.552794	18.5194	2.12471e-05	0.0172381	1.67482	18.5194	2.12471e-05	0.0172381	1.82762	18.5194	2.12471e-05	0.0172381
0.0571056	0.31065	1.80932e-05	0.0226985	-2.78								0.4	20.8982	2.06626e-05	0.0183346	0.576898	20.8982	2.06626e-05	0.0183346	1.63976	20.8982	2.06626e-05	0.0183346	1.81665	20.8982	2.06626e-05	0.0183346
0.0619387	0.35896	1.68494e-05	0.024604	-2.72								0.4	23.7105	1.99613e-05	0.0195935	0.606389	23.7105	1.99613e-05	0.0195935	1.59768	23.7105	1.99613e-05	0.0195935	1.80407	23.7105	1.99613e-05	0.0195935
0.0674947	0.417556	1.533e-05	0.0267917	-2.66								0.4	27.057	1.91161e-05	0.0210389	0.642642	27.057	1.91161e-05	0.0210389	1.54697	27.057	1.91161e-05	0.0210389	1.78961	27.057	1.91161e-05	0.0210389
0.0738829	0.489062	1.3465e-05	0.0293036	-2.6								0.4	31.065	1.80932e-05	0.0226985	0.687422	31.065	1.80932e-05	0.0226985	1.48559	31.065	1.80932e-05	0.0226985	1.77301	31.065	1.80932e-05	0.0226985
0.0812294	0.57684	1.11649e-05	0.0321877	-2.54								0.4	35.896	1.68494e-05	0.024604	0.742994	35.896	1.68494e-05	0.024604	1.41097	35.896	1.68494e-05	0.024604	1.75396	35.896	1.68494e-05	0.024604
0.0896801	0.68521	8.3147e-06	0.035499	-2.48								0.4	41.7556	1.533e-05	0.0267917	0.812282	41.7556	1.533e-05	0.0267917	1.3198	41.7556	1.533e-05	0.0267917	1.73208	41.7556	1.533e-05	0.0267917
0.0994034	0.819733	4.76628e-06	0.0393009	-2.42								0.4	48.9062	1.3465e-05	0.0293036	0.899063	48.9062	1.3465e-05	0.0293036	1.2079	48.9062	1.3465e-05	0.0293036	1.70696	48.9062	1.3465e-05	0.0293036
0.110595	0.987593	3.28357e-07	0.043666	-2.36								0.4	57.684	1.11649e-05	0.0321877	1.00823	57.684	1.11649e-05	0.0321877	1.06989	57.684	1.11649e-05	0.0321877	1.67812	57.684	1.11649e-05	0.0321877
0.12348	1.19808	-5.24661e-06	0.0486779	-2.3								0.4	68.521	8.3147e-06	0.035499	1.14613	68.521	8.3147e-06	0.035499	0.898882	68.521	8.3147e-06	0.035499	1.64501	68.521	8.3147e-06	0.035499
0.138321	1.46326	-1.22797e-05	0.0544323	-2.24								0.4	81.9733	4.76628e-06	0.0393009	1.32101	81.9733	4.76628e-06	0.0393009	0.685977	81.9733	4.76628e-06	0.0393009	1.60699	81.9733	4.76628e-06	0.0393009
0.155424	1.79878	-2.11882e-05	0.0610392	-2.18								0.4	98.7593	3.28357e-07	0.043666	1.54364	98.7593	3.28357e-07	0.043666	0.419701	98.7593	3.28357e-07	0.043666	1.56334	98.7593	3.28357e-07	0.043666
0.175143	2.22503	-3.2515e-05	0.068625	-2.12								0.4	119.808	-5.24661e-06	0.0486779	1.82802	119.808	-5.24661e-06	0.0486779	0.0852032	119.808	-5.24661e-06	0.0486779	1.51322	119.808	-5.24661e-06	0.0486779
0.197893	2.76857	-4.69683e-05	0.0773346	-2.06								0.4	146.326	-1.22797e-05	0.0544323	2.19246	146.326	-1.22797e-05	0.0544323	-0.336783	146.326	-1.22797e-05	0.0544323	1.45568	146.326	-1.22797e-05	0.0544323
0.224155	3.46407	-6.54719e-05	0.0873346	-2								0.4	179.878	-2.11882e-05	0.0610392	2.6609	179.878	-2.11882e-05	0.0610392	-0.87129	179.878	-2.11882e-05	0.0610392	1.38961	179.878	-2.11882e-05	0.0610392
0.254498	4.35685	-8.92337e-05	0.0988162	-1.94								0.4	222.503	-3.2515e-05	0.068625	3.26465	222.503	-3.2515e-05	0.068625	-1.5509	222.503	-3.2515e-05	0.068625	1.31375	222.503	-3.2515e-05	0.068625
0.289584	5.50617	-0.000119834	0.111999	-1.88								0.4	276.857	-4.69683e-05	0.0773346	4.04475	276.857	-4.69683e-05	0.0773346	-2.4181	276.857	-4.69683e-05	0.0773346	1.22665	276.857	-4.69683e-05	0.0773346
0.330197	6.98963	-0.000159341	0.127134	-1.82								0.4	346.407	-6.54719e-05	0.0873346	5.05497	346.407	-6.54719e-05	0.0873346	-3.52832	346.407	-6.54719e-05	0.0873346	1.12665	346.407	-6.54719e-05	0.0873346
0.377259	8.90895	-0.000210466	0.144512	-1.76								0.4	435.685	-8.92337e-05	0.0988162	6.36586	435.685	-8.92337e-05	0.0988162	-4.95402	435.685	-8.92337e-05	0.0988162	1.01184	435.685	-8.92337e-05	0.0988162
												0.4	550.617	-0.000119834	0.111999	8.07003	550.617	-0.000119834	0.111999	-6.79002	550.617	-0.000119834	0.111999	0.880013	550.617	-0.000119834	0.111999
												0.4	698.963	-0.000159341	0.127134	10.2891	698.963	-0.000159341	0.127134	-9.16044	698.963	-0.000159341	0.127134	0.728657	698.963	-0.000159341	0.127134
												0.4	890.895	-0.000210466	0.144512	13.1829	890.895	-0.000210466	0.144512	-12.228	890.895	-0.000210466	0.144512	0.554876	890.895	-0.000210466	0.144512

## Sheet: Fig. 9 c vs Ctot
											Constant	value
Original simulated rate profiles											KHomo	500
	Cat loading [mol%]	20	10	2	1	0.2	0.1	0.02	0.01		k1	2.5
	[Cattot]	0.1666	0.0833	0.01666	0.00833	0.001666	0.000833	0.0001666	8.33e-05		k2	100				Time-normalised rate profiles
	kobs	7.74019	3.75457	0.661422	0.301115	0.0413007	0.015968	0.00142133	0.000492233		[Sub]0	0.833					Cat loading [mol%]	20		10		2		1		0.2		0.1		0.02		0.01
	%[R]	0.0745321	0.103728	0.216817	0.291616	0.53073	0.649067	0.873023	0.928228								[Cattot]	0.1666		0.0833		0.01666		0.00833		0.001666		0.000833		0.0001666		8.33e-05
	t [min]	[Sub]t [mol/L]	[Sub]t [mol/L]	[Sub]t [mol/L]	[Sub]t [mol/L]	[Sub]t [mol/L]	[Sub]t [mol/L]	[Sub]t [mol/L]	[Sub]t [mol/L]							cat. order c	t [min]	tcat	[Sub]t [mol/L]	tcat	[Sub]t [mol/L]	tcat	[Sub]t [mol/L]	tcat	[Sub]t [mol/L]	tcat	[Sub]t [mol/L]	tcat	[Sub]t [mol/L]	tcat	[Sub]t [mol/L]	tcat	[Sub]t [mol/L]
0	0	0.833	0.833	0.833	0.833	0.833	0.833	0.833	0.833			c vs catalyst loading plots				1.08	0	0	0.833	0	0.833	0	0.833	0	0.833	0	0.833	0	0.833	0	0.833	0	0.833
-1	0.1	0.506458	0.634543	0.789501	0.812617	0.830144	0.831893	0.832901	0.832966								0.1	0.0144347	0.506458	0.00682805	0.634543	0.00120063	0.789501	0.000567932	0.812617	9.9864e-05	0.830144	4.72386e-05	0.831893	8.30633e-06	0.832901	3.92913e-06	0.832966
-0.9	0.125893	0.459789	0.597674	0.778969	0.807501	0.829408	0.831607	0.832876	0.832957		1	profile 1	profile 2	mean Cat loading	c		0.125893	0.0181723	0.459789	0.008596	0.597674	0.0015115	0.778969	0.000714984	0.807501	0.000125721	0.829408	5.94698e-05	0.831607	1.0457e-05	0.832876	4.94648e-06	0.832957
-0.8	0.158489	0.411994	0.556936	0.766102	0.801151	0.828483	0.831248	0.832844	0.832946			20	10	15	0.78		0.158489	0.0228775	0.411994	0.0108217	0.556936	0.00190287	0.766102	0.000900112	0.801151	0.000158274	0.828483	7.48681e-05	0.831248	1.31646e-05	0.832844	6.22725e-06	0.832946
-0.7	0.199526	0.364318	0.512922	0.750497	0.793298	0.827321	0.830795	0.832803	0.832932			10	2	6	0.72		0.199526	0.0288011	0.364318	0.0136237	0.512922	0.00239557	0.750497	0.00113317	0.793298	0.000199255	0.827321	9.42533e-05	0.830795	1.65733e-05	0.832803	7.83965e-06	0.832932
-0.6	0.251189	0.317993	0.466508	0.731731	0.783627	0.825863	0.830226	0.832752	0.832914			2	1	1.5	0.67		0.251189	0.0362584	0.317993	0.0171513	0.466508	0.00301584	0.731731	0.00142658	0.783627	0.000250847	0.825863	0.000118658	0.830226	2.08645e-05	0.832752	9.86953e-06	0.832914
-0.5	0.316228	0.274112	0.418799	0.709401	0.771783	0.824035	0.829511	0.832688	0.832892			1	0.2	0.6	0.65		0.316228	0.0456467	0.274112	0.0215922	0.418799	0.00379672	0.709401	0.00179596	0.771783	0.000315798	0.824035	0.000149381	0.829511	2.62669e-05	0.832688	1.2425e-05	0.832892
-0.4	0.398107	0.233541	0.37103	0.683155	0.757371	0.821745	0.828612	0.832608	0.832864			0.2	0.1	0.15	0.65		0.398107	0.0574657	0.233541	0.027183	0.37103	0.00477979	0.683155	0.00226098	0.757371	0.000397566	0.821745	0.00018806	0.828612	3.30681e-05	0.832608	1.56422e-05	0.832864
-0.3	0.501187	0.19686	0.324441	0.652752	0.739976	0.81888	0.827484	0.832506	0.832829			0.1	0.02	0.06	0.72		0.501187	0.0723451	0.19686	0.0342213	0.324441	0.0060174	0.652752	0.0028464	0.739976	0.000500506	0.81888	0.000236754	0.827484	4.16302e-05	0.832506	1.96923e-05	0.832829
-0.2	0.630957	0.16436	0.280155	0.61812	0.719181	0.815302	0.826067	0.832378	0.832785			0.02	0.01	0.015	0.81		0.630957	0.0910771	0.16436	0.0430821	0.280155	0.00757546	0.61812	0.00358341	0.719181	0.000630099	0.815302	0.000298055	0.826067	5.24094e-05	0.832378	2.47911e-05	0.832785
-0.1	0.794328	0.136078	0.239072	0.579419	0.694606	0.810842	0.824291	0.832217	0.832729				KHomo	2000			0.794328	0.114659	0.136078	0.0542371	0.239072	0.00953694	0.579419	0.00451125	0.694606	0.000793248	0.810842	0.000375229	0.824291	6.59795e-05	0.832217	3.12102e-05	0.832729
0	1	0.111848	0.201814	0.537085	0.665959	0.805295	0.822065	0.832015	0.832659				k1	2.5			1	0.144347	0.111848	0.0682805	0.201814	0.0120063	0.537085	0.00567932	0.665959	0.00099864	0.805295	0.000472386	0.822065	8.30633e-05	0.832015	3.92913e-05	0.832659
0.1	1.25893	0.0913676	0.168714	0.491845	0.633087	0.798419	0.819281	0.83176	0.83257				k2	0.25			1.25893	0.181723	0.0913676	0.08596	0.168714	0.015115	0.491845	0.00714984	0.633087	0.00125721	0.798419	0.000594698	0.819281	0.00010457	0.83176	4.94648e-05	0.83257
0.2	1.58489	0.0742509	0.139839	0.444689	0.596049	0.789929	0.815802	0.83144	0.832459				[Sub]0	0.833			1.58489	0.228775	0.0742509	0.108217	0.139839	0.0190287	0.444689	0.00900112	0.596049	0.00158274	0.789929	0.000748681	0.815802	0.000131646	0.83144	6.22725e-05	0.832459
0.3	1.99526	0.060081	0.11505	0.396796	0.55516	0.779493	0.811464	0.831037	0.832319								1.99526	0.288011	0.060081	0.136237	0.11505	0.0239557	0.396796	0.0113317	0.55516	0.00199255	0.779493	0.000942533	0.811464	0.000165733	0.831037	7.83965e-05	0.832319
0.4	2.51189	0.0484427	0.0940597	0.349419	0.511026	0.76674	0.806068	0.83053	0.832143								2.51189	0.362584	0.0484427	0.171513	0.0940597	0.0301584	0.349419	0.0142658	0.511026	0.00250847	0.76674	0.00118658	0.806068	0.000208645	0.83053	9.86953e-05	0.832143
0.5	3.16228	0.0389452	0.0764907	0.303759	0.464535	0.751267	0.799376	0.829893	0.831921		2	profile 1	profile 2	mean Cat loading	c		3.16228	0.456467	0.0389452	0.215922	0.0764907	0.0379672	0.303759	0.0179596	0.464535	0.00315798	0.751267	0.00149381	0.799376	0.000262669	0.829893	0.00012425	0.831921
0.6	3.98107	0.0312356	0.0619283	0.260848	0.416799	0.732654	0.791108	0.829092	0.831642			20	10	15	1		3.98107	0.574657	0.0312356	0.27183	0.0619283	0.0477979	0.260848	0.0226098	0.416799	0.00397566	0.732654	0.0018806	0.791108	0.000330681	0.829092	0.000156422	0.831642
0.7	5.01187	0.0250042	0.0499552	0.221462	0.369054	0.710493	0.780939	0.828086	0.831292			10	2	6	1		5.01187	0.723451	0.0250042	0.342213	0.0499552	0.060174	0.221462	0.028464	0.369054	0.00500506	0.710493	0.00236754	0.780939	0.000416302	0.828086	0.000196923	0.831292
0.8	6.30957	0.0199849	0.0401764	0.186089	0.322541	0.68443	0.768503	0.826823	0.83085			2	1	1.5	1		6.30957	0.910771	0.0199849	0.430821	0.0401764	0.0757546	0.186089	0.0358341	0.322541	0.00630099	0.68443	0.00298055	0.768503	0.000524094	0.826823	0.000247911	0.83085
0.9	7.94328	0.0159533	0.032233	0.154935	0.278372	0.654218	0.753398	0.825239	0.830296			1	0.2	0.6	1		7.94328	1.14659	0.0159533	0.542371	0.032233	0.0953694	0.154935	0.0451125	0.278372	0.00793248	0.654218	0.00375229	0.753398	0.000659795	0.825239	0.000312102	0.830296
1	10	0.0127223	0.025809	0.127964	0.237438	0.619776	0.735207	0.823253	0.829598			0.2	0.1	0.15	1		10	1.44347	0.0127223	0.682805	0.025809	0.120063	0.127964	0.0567932	0.237438	0.0099864	0.619776	0.00472386	0.735207	0.000830633	0.823253	0.000392913	0.829598
1.1	12.5893	0.0101375	0.0206323	0.104962	0.200349	0.581252	0.713518	0.820766	0.828722			0.1	0.02	0.06	1		12.5893	1.81723	0.0101375	0.8596	0.0206323	0.15115	0.104962	0.0714984	0.200349	0.0125721	0.581252	0.00594698	0.713518	0.0010457	0.820766	0.000494648	0.828722
1.2	15.8489	0.0080727	0.0164727	0.0855922	0.167425	0.539069	0.687968	0.817657	0.827622			0.02	0.01	0.015	1		15.8489	2.28775	0.0080727	1.08217	0.0164727	0.190287	0.0855922	0.0900112	0.167425	0.0158274	0.539069	0.00748681	0.687968	0.00131646	0.817657	0.000622725	0.827622
1.3	19.9526	0.00642518	0.0131382	0.0694561	0.138725	0.49394	0.658291	0.813776	0.82624				KHomo	2000			19.9526	2.88011	0.00642518	1.36237	0.0131382	0.239557	0.0694561	0.113317	0.138725	0.0199255	0.49394	0.00942533	0.658291	0.00165733	0.813776	0.000783965	0.82624
1.4	25.1189	0.00511181	0.01047	0.0561336	0.114101	0.446846	0.624384	0.808942	0.824508				k1	2.5			25.1189	3.62584	0.00511181	1.71513	0.01047	0.301584	0.0561336	0.142658	0.114101	0.0250847	0.446846	0.0118658	0.624384	0.00208645	0.808942	0.000986953	0.824508
1.5	31.6228	0.00406559	0.00833816	0.0452152	0.0932613	0.398959	0.586361	0.802938	0.822337				k2	5			31.6228	4.56467	0.00406559	2.15922	0.00833816	0.379672	0.0452152	0.179596	0.0932613	0.0315798	0.398959	0.0149381	0.586361	0.00262669	0.802938	0.0012425	0.822337
1.6	39.8107	0.00323266	0.0066369	0.0363212	0.0758261	0.351532	0.544609	0.795504	0.819621				[Sub]0	0.833			39.8107	5.74657	0.00323266	2.7183	0.0066369	0.477979	0.0363212	0.226098	0.0758261	0.0397566	0.351532	0.018806	0.544609	0.00330681	0.795504	0.00156422	0.819621
1.7	50.1187	0.00256984	0.00528053	0.029112	0.0613799	0.305771	0.499806	0.786339	0.816226								50.1187	7.23451	0.00256984	3.42213	0.00528053	0.60174	0.029112	0.28464	0.0613799	0.0500506	0.305771	0.0236754	0.499806	0.00416302	0.786339	0.00196923	0.816226
1.8	63.0957	0.00204259	0.00419995	0.0232919	0.0495061	0.262717	0.4529	0.775097	0.811993								63.0957	9.10771	0.00204259	4.30821	0.00419995	0.757546	0.0232919	0.358341	0.0495061	0.0630099	0.262717	0.0298055	0.4529	0.00524094	0.775097	0.00247911	0.811993
1.9	79.4328	0.00162331	0.0033396	0.0186084	0.0398107	0.223159	0.405044	0.761394	0.806725								79.4328	11.4659	0.00162331	5.42371	0.0033396	0.953694	0.0186084	0.451125	0.0398107	0.0793248	0.223159	0.0375229	0.405044	0.00659795	0.761394	0.00312102	0.806725
2	100	0.00128996	0.00265493	0.0148494	0.0319367	0.187598	0.35749	0.744816	0.80019		3	profile 1	profile 2	mean Cat loading	c		100	14.4347	0.00128996	6.82805	0.00265493	1.20063	0.0148494	0.567932	0.0319367	0.099864	0.187598	0.0472386	0.35749	0.00830633	0.744816	0.00392913	0.80019
2.1	125.893	0.00102498	0.00211027	0.0118387	0.0255698	0.156252	0.311455	0.724945	0.792111			20	10	15	1.12		125.893	18.1723	0.00102498	8.596	0.00211027	1.5115	0.0118387	0.714984	0.0255698	0.125721	0.156252	0.0594698	0.311455	0.010457	0.724945	0.00494648	0.792111
2.2	158.489	0.000814373	0.00167712	0.00943141	0.0204399	0.129096	0.268007	0.701387	0.78217			10	2	6	1.22		158.489	22.8775	0.000814373	10.8217	0.00167712	1.90287	0.00943141	0.900112	0.0204399	0.158274	0.129096	0.0748681	0.268007	0.0131646	0.701387	0.00622725	0.78217
2.3	199.526	0.00064701	0.00133274	0.00750912	0.0163183	0.10592	0.227971	0.673821	0.770005			2	1	1.5	1.35		199.526	28.8011	0.00064701	13.6237	0.00133274	2.39557	0.00750912	1.13317	0.0163183	0.199255	0.10592	0.0942533	0.227971	0.0165733	0.673821	0.00783965	0.770005
2.4	251.189	0.00051402	0.00105898	0.00597578	0.0130145	0.086395	0.191884	0.642053	0.755216			1	0.2	0.6	1.48		251.189	36.2584	0.00051402	17.1513	0.00105898	3.01584	0.00597578	1.42658	0.0130145	0.250847	0.086395	0.118658	0.191884	0.0208645	0.642053	0.00986953	0.755216
2.5	316.228	0.000408353	0.000841396	0.00475375	0.0103712	0.0701218	0.16	0.606081	0.737388			0.2	0.1	0.15	1.53		316.228	45.6467	0.000408353	21.5922	0.000841396	3.79672	0.00475375	1.79596	0.0103712	0.315798	0.0701218	0.149381	0.16	0.0262669	0.606081	0.012425	0.737388
2.6	398.107	0.000324399	0.000668484	0.00378047	0.00825925	0.0566811	0.132319	0.566148	0.716106			0.1	0.02	0.06	1.4		398.107	57.4657	0.000324399	27.183	0.000668484	4.77979	0.00378047	2.26098	0.00825925	0.397566	0.0566811	0.18806	0.132319	0.0330681	0.566148	0.0156422	0.716106
2.7	501.187	0.0002577	0.000531083	0.00300574	0.00657396	0.0456624	0.108655	0.522784	0.690998			0.02	0.01	0.015	1.21		501.187	72.3451	0.0002577	34.2213	0.000531083	6.0174	0.00300574	2.8464	0.00657396	0.500506	0.0456624	0.236754	0.108655	0.0416302	0.522784	0.0196923	0.690998
2.8	630.957	0.000204711	0.00042191	0.00238932	0.00523037	0.0366845	0.0886868	0.476808	0.661788				KHomo	60			630.957	91.0771	0.000204711	43.0821	0.00042191	7.57546	0.00238932	3.58341	0.00523037	0.630099	0.0366845	0.298055	0.0886868	0.0524094	0.476808	0.0247911	0.661788
2.9	794.328	0.000162616	0.00033517	0.00189902	0.00416	0.0294059	0.0720236	0.429279	0.628348				k1	2.5			794.328	114.659	0.000162616	54.2371	0.00033517	9.53694	0.00189902	4.51125	0.00416	0.793248	0.0294059	0.375229	0.0720236	0.0659795	0.429279	0.0312102	0.628348
3	1000	0.000129176	0.000266257	0.00150916	0.00330781	0.0235288	0.0582461	0.381415	0.590767				k2	100			1000	144.347	0.000129176	68.2805	0.000266257	12.0063	0.00150916	5.67932	0.00330781	0.99864	0.0235288	0.472386	0.0582461	0.0830633	0.381415	0.0392913	0.590767
3.1	1258.93	0.000102611	0.000211509	0.00119921	0.00262963	0.0187988	0.0469416	0.334467	0.549401				[Sub]0	0.833			1258.93	181.723	0.000102611	85.96	0.000211509	15.115	0.00119921	7.14984	0.00262963	1.25721	0.0187988	0.594698	0.0469416	0.10457	0.334467	0.0494648	0.549401
3.2	1584.89	8.15091e-05	0.000168016	0.00095285	0.00209015	0.015002	0.0377243	0.289591	0.504893								1584.89	228.775	8.15091e-05	108.217	0.000168016	19.0287	0.00095285	9.00112	0.00209015	1.58274	0.015002	0.748681	0.0377243	0.131646	0.289591	0.0622725	0.504893
3.3	1995.26	6.47462e-05	0.000133466	0.000757054	0.00166112	0.0119608	0.0302472	0.247745	0.458166								1995.26	288.011	6.47462e-05	136.237	0.000133466	23.9557	0.000757054	11.3317	0.00166112	1.99255	0.0119608	0.942533	0.0302472	0.165733	0.247745	0.0783965	0.458166
3.4	2511.89	5.14306e-05	0.000106019	0.000601462	0.00132002	0.00952898	0.024207	0.209612	0.410355		4	profile 1	profile 2	mean Cat loading	c		2511.89	362.584	5.14306e-05	171.513	0.000106019	30.1584	0.000601462	14.2658	0.00132002	2.50847	0.00952898	1.18658	0.024207	0.208645	0.209612	0.0986953	0.410355
3.5	3162.28	4.08533e-05	8.42162e-05	0.000477829	0.00104887	0.00758699	0.0193439	0.175588	0.362705			20	10	15	1.05		3162.28	456.467	4.08533e-05	215.922	8.42162e-05	37.9672	0.000477829	17.9596	0.00104887	3.15798	0.00758699	1.49381	0.0193439	0.262669	0.175588	0.12425	0.362705
3.6	3981.07	3.24513e-05	6.68967e-05	0.000379598	0.000833361	0.00603787	0.0154392	0.145796	0.316446			10	2	6	1.08		3981.07	574.657	3.24513e-05	271.83	6.68967e-05	47.7979	0.000379598	22.6098	0.000833361	3.97566	0.00603787	1.8806	0.0154392	0.330681	0.145796	0.156422	0.316446
3.7	5011.87	2.57772e-05	5.31388e-05	0.000301554	0.000662099	0.00480321	0.0123107	0.120134	0.272666			2	1	1.5	1.13		5011.87	723.451	2.57772e-05	342.213	5.31388e-05	60.174	0.000301554	28.464	0.000662099	5.00506	0.00480321	2.36754	0.0123107	0.416302	0.120134	0.196923	0.272666
3.8	6309.57	2.04756e-05	4.22102e-05	0.00023955	0.00052601	0.00381985	0.00980854	0.098343	0.23222			1	0.2	0.6	1.23		6309.57	910.771	2.04756e-05	430.821	4.22102e-05	75.7546	0.00023955	35.8341	0.00052601	6.30099	0.00381985	2.98055	0.00980854	0.524094	0.098343	0.247911	0.23222
3.9	7943.28	1.62645e-05	3.35291e-05	0.000190293	0.000417879	0.00303708	0.00781011	0.0800606	0.195678			0.2	0.1	0.15	1.37		7943.28	1146.59	1.62645e-05	542.371	3.35291e-05	95.3694	0.000190293	45.1125	0.000417879	7.93248	0.00303708	3.75229	0.00781011	0.659795	0.0800606	0.312102	0.195678
4	10000	1.29194e-05	2.66333e-05	0.000151162	0.000331967	0.00241425	0.00621578	0.0648768	0.163324			0.1	0.02	0.06	1.5		10000	1443.47	1.29194e-05	682.805	2.66333e-05	120.063	0.000151162	56.7932	0.000331967	9.9864	0.00241425	4.72386	0.00621578	0.830633	0.0648768	0.392913	0.163324
4.1	12589.3	1.02623e-05	2.11557e-05	0.000120077	0.000263712	0.00191885	0.00494496	0.0523724	0.135184			0.02	0.01	0.015	1.52		12589.3	1817.23	1.02623e-05	859.6	2.11557e-05	151.15	0.000120077	71.4984	0.000263712	12.5721	0.00191885	5.94698	0.00494496	1.0457	0.0523724	0.494648	0.135184
													KHomo	500
													k1	2.5
													k2	100
													[Sub]0	0.833

## Sheet: Sup. Fig. 3 k_Cat vs Cat(eeL=0)
kobs/[Cattot]	[Cattot]	beta	alpha											k1 = 2.5		k1 = 2.5	k1 = 2.5			k1 = 2.5			k1 = 2.5				k1 = 2.5	k1 = 2.5	k1 = 2.5			k1 = 2.5			k1 = 2.5
2.78299	1e-05	2.35822e-11	9.7123e-06	-5		Constant	value						KHomo = 30	k2 = 5		k2 = 25	k2 = 5		KHomo = 30	k2 = 5		KHomo = 100	k2 = 5			KHomo = 300	k2 = 5	k2 = 25	k2 = 5		KHomo = 3000	k2 = 25		KHomo = 300	k2 = 25
2.82225	1.14815e-05	3.08324e-11	1.11054e-05	-4.94		KHomo	3000						KHetero = 300	k2' = 5		k2' = 5	k2' = 25		KHetero = 3000	k2' = 25		KHetero = 300	k2' = 25			KHetero = 100	k2' = 5	k2' = 5	k2' = 25		KHetero = 100	k2' = 5		KHetero = 300	k2' = 5
2.86655	1.31826e-05	4.02673e-11	1.26913e-05	-4.88		KHetero	100					[Cattot]	kobs/[Cattot]	beta	alpha	kobs/[Cattot]	kobs/[Cattot]	kobs/[Cattot]	beta	alpha	kobs/[Cattot]	beta	alpha		kobs/[Cattot]	beta	alpha	kobs/[Cattot]	kobs/[Cattot]	kobs/[Cattot]	beta	alpha	kobs/[Cattot]	beta	alpha
2.91643	1.51356e-05	5.25249e-11	1.44948e-05	-4.82		k1	2.5					1e-05	2.5	2.49104e-11	9.98206e-06	2.50299	2.51495	2.64558	2.42631e-11	9.85151e-06	2.51493	2.48758e-11	9.97512e-06		2.5	2.48265e-11	9.96524e-06	2.52979	2.50497	2.78299	2.35822e-11	9.7123e-06	2.52973	2.47775e-11	9.9554e-06
2.97246	1.7378e-05	6.84201e-11	1.65433e-05	-4.76		k2	25					1.14815e-05	2.5	3.28209e-11	1.14579e-05	2.50343	2.51715	2.66643	3.1847e-11	1.12866e-05	2.51712	3.27686e-11	1.14488e-05		2.5	3.26942e-11	1.14358e-05	2.53417	2.5057	2.82225	3.08324e-11	1.11054e-05	2.53409	3.26202e-11	1.14228e-05
3.03521	1.99526e-05	8.89904e-11	1.88669e-05	-4.7		k2'	5					1.31826e-05	2.5	4.32401e-11	1.31514e-05	2.50394	2.51968	2.69014	4.17762e-11	1.29269e-05	2.51964	4.3161e-11	1.31394e-05		2.5	4.30487e-11	1.31223e-05	2.53919	2.50653	2.86655	4.02673e-11	1.26913e-05	2.53909	4.29371e-11	1.31053e-05
3.10528	2.29087e-05	1.15551e-10	2.1499e-05	-4.64		k2/k1	10					1.51356e-05	2.5	5.69617e-11	1.50946e-05	2.50452	2.52258	2.71709	5.47634e-11	1.48005e-05	2.52253	5.68423e-11	1.50788e-05		2.5	5.66728e-11	1.50563e-05	2.54493	2.50749	2.91643	5.25249e-11	1.44948e-05	2.5448	5.65046e-11	1.50339e-05
3.18326	2.63027e-05	1.49763e-10	2.44756e-05	-4.58		k2'/k1	2					1.7378e-05	2.5	7.50301e-11	1.7324e-05	2.50518	2.52591	2.74767	7.17325e-11	1.6939e-05	2.52584	7.48498e-11	1.73032e-05		2.5	7.45941e-11	1.72736e-05	2.55151	2.50858	2.97246	6.84201e-11	1.65433e-05	2.55133	7.43406e-11	1.72442e-05
3.26974	3.01995e-05	1.93714e-10	2.78362e-05	-4.52		KHetero/KHomo	0.0333333					1.99526e-05	2.5	9.88183e-11	1.98815e-05	2.50594	2.52972	2.7823	9.38776e-11	1.93781e-05	2.52963	9.85461e-11	1.98541e-05		2.5	9.81605e-11	1.98152e-05	2.55904	2.50984	3.03521	8.89904e-11	1.88669e-05	2.55881	9.77787e-11	1.97766e-05
3.36525	3.46737e-05	2.50012e-10	3.16235e-05	-4.46								2.29087e-05	2.5	1.30131e-10	2.2815e-05	2.50682	2.53408	2.82146	1.22739e-10	2.21575e-05	2.53397	1.2972e-10	2.2779e-05		2.5	1.29139e-10	2.27279e-05	2.56765	2.51127	3.10528	1.15551e-10	2.1499e-05	2.56734	1.28565e-10	2.26773e-05
3.47031	3.98107e-05	3.21906e-10	3.58835e-05	-4.4								2.63027e-05	2.5	1.71339e-10	2.61793e-05	2.50782	2.53908	2.86566	1.60297e-10	2.53217e-05	2.53894	1.7072e-10	2.6132e-05		2.5	1.69845e-10	2.60649e-05	2.57749	2.51291	3.18326	1.49763e-10	2.44756e-05	2.57709	1.68981e-10	2.59985e-05
3.58534	4.57088e-05	4.13414e-10	4.06652e-05	-4.34								3.01995e-05	2.5	2.25557e-10	3.00371e-05	2.50896	2.54481	2.91542	2.0909e-10	2.89199e-05	2.54463	2.24624e-10	2.99749e-05		2.5	2.23307e-10	2.98869e-05	2.58873	2.51479	3.26974	1.93714e-10	2.78362e-05	2.58822	2.22009e-10	2.97999e-05
3.71069	5.24807e-05	5.29484e-10	4.6021e-05	-4.28								3.46737e-05	2.5	2.96872e-10	3.44599e-05	2.51027	2.55137	2.9713	2.72363e-10	3.30068e-05	2.55113	2.95465e-10	3.43782e-05		2.5	2.93485e-10	3.42628e-05	2.60157	2.51693	3.36525	2.50012e-10	3.16235e-05	2.6009	2.91537e-10	3.41489e-05
3.8466	6.0256e-05	6.76173e-10	5.20066e-05	-4.22								3.98107e-05	2.5	3.90644e-10	3.95295e-05	2.51178	2.55888	3.03389	3.54244e-10	3.76427e-05	2.55856	3.88527e-10	3.94222e-05		2.5	3.85552e-10	3.92709e-05	2.61622	2.51937	3.47031	3.21906e-10	3.58835e-05	2.61534	3.82632e-10	3.9122e-05
3.99318	6.91831e-05	8.60855e-10	5.86807e-05	-4.16								4.57088e-05	2.5	5.13902e-10	4.53388e-05	2.51349	2.56746	3.10378	4.5997e-10	4.28938e-05	2.56704	5.10717e-10	4.51981e-05		2.5	5.06252e-10	4.50001e-05	2.63291	2.52215	3.58534	4.13414e-10	4.06652e-05	2.63176	5.01882e-10	4.48054e-05
4.15039	7.94328e-05	1.09246e-09	6.61048e-05	-4.1								5.24807e-05	2.5	6.75848e-10	5.19941e-05	2.51545	2.57727	3.18156	5.96149e-10	4.88323e-05	2.57672	6.71061e-10	5.18097e-05		2.5	6.64367e-10	5.15506e-05	2.65191	2.52532	3.71069	5.29484e-10	4.6021e-05	2.65042	6.57836e-10	5.12966e-05
4.31807	9.12011e-05	1.38175e-09	7.43438e-05	-4.04								6.0256e-05	2.5	8.88523e-10	5.96162e-05	2.51769	2.58847	3.26781	7.71087e-10	5.55369e-05	2.58776	8.81336e-10	5.93746e-05		2.5	8.71316e-10	5.90361e-05	2.67352	2.52892	3.8466	6.76173e-10	5.20066e-05	2.67158	8.61573e-10	5.87051e-05
4.49587	0.000104713	1.74161e-09	8.34652e-05	-3.98								6.91831e-05	2.5	1.16767e-09	6.83424e-05	2.52025	2.60127	3.36308	9.95171e-10	6.30927e-05	2.60033	1.15689e-09	6.80262e-05		2.5	1.14191e-09	6.75844e-05	2.69807	2.53301	3.99318	8.60855e-10	5.86807e-05	2.69555	1.12741e-09	6.71538e-05
4.68331	0.000120226	2.18743e-09	9.35398e-05	-3.92								7.94328e-05	2.5	1.53384e-09	7.83285e-05	2.52317	2.61586	3.46785	1.28132e-09	7.15911e-05	2.61464	1.51769e-09	7.79151e-05		2.5	1.49534e-09	7.73393e-05	2.7259	2.53765	4.15039	1.09246e-09	6.61048e-05	2.72265	1.47379e-09	7.678e-05
4.87974	0.000138038	2.73746e-09	0.000104641	-3.86								9.12011e-05	2.5	2.01382e-09	8.97511e-05	2.5265	2.63249	3.58258	1.64554e-09	8.11304e-05	2.6309	1.98967e-09	8.92114e-05		2.5	1.95639e-09	8.84621e-05	2.75742	2.5429	4.31807	1.38175e-09	7.43438e-05	2.75321	1.92445e-09	8.77371e-05
5.08438	0.000158489	3.41331e-09	0.000116847	-3.8								0.000104713	2.5	2.64249e-09	0.00010281	2.53028	2.65141	3.70759	2.1075e-09	9.1815e-05	2.64935	2.60643e-09	0.000102106		2.5	2.55698e-09	0.000101133	2.79303	2.54884	4.49587	1.74161e-09	8.34652e-05	2.78762	2.50977e-09	0.000100195
5.29634	0.00018197	4.24042e-09	0.000130237	-3.74								0.000120226	2.5	3.46518e-09	0.000117732	2.53459	2.67293	3.84312	2.69131e-09	0.000103756	2.67025	3.41144e-09	0.000116815		2.5	3.33813e-09	0.000115553	2.83318	2.55553	4.68331	2.18743e-09	9.35398e-05	2.82624	3.26858e-09	0.000114343
5.51462	0.00020893	5.24869e-09	0.000144896	-3.68								0.000138038	2.5	4.54068e-09	0.000134769	2.53947	2.69737	3.98929	3.42631e-09	0.000117069	2.69389	4.46075e-09	0.000133578		2.5	4.35238e-09	0.000131945	2.87836	2.56306	4.87974	2.73746e-09	0.000104641	2.86948	4.25026e-09	0.000130388
5.73813	0.000239883	6.47311e-09	0.000160911	-3.62								0.000158489	2.5	5.94509e-09	0.000154209	2.54501	2.72507	4.14606	4.34804e-09	0.000131879	2.72058	5.82649e-09	0.000152663		2.5	5.66677e-09	0.000150556	2.92906	2.57151	5.08438	3.41331e-09	0.000116847	2.91775	5.51737e-09	0.000148558
5.96576	0.000275423	7.95458e-09	0.000178377	-3.56								0.00018197	2.5	7.77667e-09	0.000176371	2.55128	2.75642	4.31325	5.49929e-09	0.000148314	2.75063	7.60113e-09	0.000174369		2.5	7.36653e-09	0.000171657	2.98578	2.58096	5.29634	4.24042e-09	0.000130237	2.97143	7.14888e-09	0.000169102
6.19636	0.000316228	9.74076e-09	0.000197391	-3.5								0.00020893	2.5	1.0162e-08	0.000201613	2.55837	2.79183	4.49054	6.93137e-09	0.00016651	2.78439	9.90291e-09	0.000199027		2.5	9.55958e-09	0.000195546	3.04906	2.59151	5.51462	5.24869e-09	0.000144896	3.03093	9.24392e-09	0.000192291
6.42877	0.000363078	1.18871e-08	0.000218056	-3.44								0.000239883	2.5	1.32634e-08	0.000230334	2.56635	2.83175	4.67742	8.70545e-09	0.000186606	2.82222	1.28824e-08	0.000227001		2.5	1.2382e-08	0.000222549	3.1194	2.60323	5.73813	6.47311e-09	0.000160911	3.09661	1.19264e-08	0.000218416
6.66186	0.000416869	1.44579e-08	0.000240482	-3.38								0.000275423	2.5	1.72889e-08	0.000262975	2.57533	2.87663	4.87326	1.08942e-08	0.00020875	2.86447	1.67304e-08	0.000258692		2.5	1.60044e-08	0.000253017	3.1973	2.61622	5.96576	7.95458e-09	0.000178377	3.1688	1.53503e-08	0.000247792
6.89456	0.00047863	1.75281e-08	0.000264787	-3.32								0.000316228	2.5	2.25038e-08	0.000300025	2.5854	2.92698	5.07729	1.35835e-08	0.000233097	2.91151	2.16884e-08	0.000294539		2.5	2.06399e-08	0.000287332	3.28323	2.63054	6.19636	9.74076e-09	0.000197391	3.24779	1.97061e-08	0.000280757
7.12584	0.000549541	2.11841e-08	0.000291095	-3.26								0.000363078	2.5	2.92447e-08	0.000342022	2.59666	2.98328	5.2886	1.68747e-08	0.000259805	2.96369	2.80594e-08	0.000335019		2.5	2.65533e-08	0.000325903	3.37761	2.64627	6.42877	1.18871e-08	0.000218056	3.33381	2.52281e-08	0.000317667
7.35475	0.000630957	2.55262e-08	0.000319538	-3.2								0.000416869	2.5	3.79381e-08	0.000389554	2.60921	3.04604	5.5062	2.08866e-08	0.000289044	3.02136	3.62229e-08	0.000380646		2.5	3.40715e-08	0.000369169	3.48078	2.66346	6.66186	1.44579e-08	0.000240482	3.427	3.2203e-08	0.000358904
7.58041	0.000724436	3.06703e-08	0.000350259	-3.14								0.00047863	2.5	4.91206e-08	0.000443263	2.62315	3.11576	5.72902	2.57584e-08	0.000320989	3.08481	4.66514e-08	0.000431979		2.5	4.35964e-08	0.000417595	3.59303	2.68217	6.89456	1.75281e-08	0.000264787	3.52742	4.09794e-08	0.000404867
7.80205	0.000831764	3.67505e-08	0.000383408	-3.08								0.000549541	2.5	6.34652e-08	0.000503846	2.63859	3.19293	5.95593	3.16529e-08	0.000355825	3.15433	5.99298e-08	0.000489611		2.5	5.56191e-08	0.000471674	3.71452	2.70242	7.12584	2.11841e-08	0.000291095	3.63504	5.19791e-08	0.000455978
8.01898	0.000954993	4.39216e-08	0.000419149	-3.02								0.000630957	2.5	8.18112e-08	0.000572053	2.65559	3.27797	6.18578	3.87595e-08	0.000393749	3.23011	7.67785e-08	0.000554179		2.5	7.07364e-08	0.000531926	3.84532	2.72422	7.35475	2.55262e-08	0.000319538	3.74972	6.571e-08	0.000512679
8.23061	0.00109648	5.23624e-08	0.000457657	-2.96								0.000724436	2.5	1.052e-07	0.000648692	2.67426	3.3713	6.41744	4.72989e-08	0.000434966	3.31233	9.80803e-08	0.000626356		2.5	8.96698e-08	0.000598898	3.98535	2.74756	7.58041	3.06703e-08	0.000350259	3.87122	8.27803e-08	0.000575431
8.43643	0.00125893	6.22794e-08	0.000499117	-2.9								0.000831764	2.5	1.34918e-07	0.000734623	2.69465	3.47324	6.64978	5.75273e-08	0.000479697	3.40105	1.2491e-07	0.000706853		2.5	1.13287e-07	0.000673162	4.13441	2.7724	7.80205	3.67505e-08	0.000383408	3.9992	1.03915e-07	0.000644717
8.63604	0.00144544	7.39106e-08	0.00054373	-2.84								0.000954993	2.5	1.72542e-07	0.000830763	2.71681	3.58404	6.88171	6.97417e-08	0.000528173	3.49627	1.58572e-07	0.000796421		2.5	1.42626e-07	0.000755317	4.29217	2.7987	8.01898	4.39216e-08	0.000419149	4.1332	1.29974e-07	0.000721039
8.8291	0.00165959	8.75307e-08	0.000591712	-2.78								0.00109648	2.5	2.19998e-07	0.000938079	2.74077	3.70384	7.11222	8.42867e-08	0.000580643	3.59788	2.00634e-07	0.000895844		2.5	1.78923e-07	0.000845986	4.45816	2.82636	8.23061	5.23624e-08	0.000457657	4.27268	1.61975e-07	0.000804923
9.01536	0.00190546	1.03456e-07	0.000643293	-2.72								0.00125893	2.5	2.79626e-07	0.00105759	2.76654	3.83269	7.34036	1.01561e-07	0.000637373	3.7057	2.52981e-07	0.00100594		2.5	2.23645e-07	0.000945822	4.63177	2.8553	8.43643	6.22794e-08	0.000499117	4.41702	2.01115e-07	0.000896918
9.19465	0.00218776	1.22053e-07	0.00069872	-2.66								0.00144544	2.5	3.54251e-07	0.00119038	2.7941	3.97049	7.56526	1.22026e-07	0.000698643	3.81943	3.17859e-07	0.00112758		2.5	2.78524e-07	0.00105551	4.8123	2.88538	8.63604	7.39106e-08	0.00054373	4.56554	2.48801e-07	0.000997599
9.36686	0.00251189	1.4374e-07	0.000758261	-2.6								0.00165959	2.5	4.47264e-07	0.00133756	2.8234	4.11702	7.78615	1.46214e-07	0.000764758	3.93869	3.97939e-07	0.00126165		2.5	3.45597e-07	0.00117575	4.99892	2.91649	8.8291	8.75307e-08	0.000591712	4.71749	3.06677e-07	0.00110757
9.53194	0.00288403	1.69003e-07	0.000822199	-2.54								0.00190546	2.5	5.62724e-07	0.0015003	2.85439	4.27193	8.00234	1.74742e-07	0.000836042	4.06302	4.96378e-07	0.00140908		2.5	4.27258e-07	0.0013073	5.19074	2.94846	9.01536	1.03456e-07	0.000643293	4.87212	3.76666e-07	0.00122746
9.68987	0.00331131	1.98399e-07	0.000890841	-2.48								0.00218776	2.5	7.05458e-07	0.00167983	2.88695	4.43474	8.21324	2.0832e-07	0.000912842	4.19187	6.16901e-07	0.00157086		2.5	5.26304e-07	0.00145094	5.38681	2.98113	9.19465	1.22053e-07	0.00069872	5.02865	4.61007e-07	0.00135795
9.84072	0.00380189	2.32572e-07	0.000964515	-2.42								0.00251189	2.5	8.81187e-07	0.00187743	2.92097	4.60484	8.41835	2.4777e-07	0.000995531	4.32464	7.63881e-07	0.00174801		2.5	6.46001e-07	0.00160748	5.58613	3.01436	9.36686	1.4374e-07	0.000758261	5.18629	5.62304e-07	0.00149974
9.98457	0.00436516	2.72261e-07	0.00104357	-2.36								0.00288403	2.5	1.09666e-06	0.00209443	2.9563	4.78152	8.61726	2.9404e-07	0.00108451	4.46068	9.42442e-07	0.00194159		2.5	7.90155e-07	0.00177781	5.78771	3.04795	9.53194	1.69003e-07	0.000822199	5.34428	6.83583e-07	0.00165358
10.1215	0.00501187	3.18318e-07	0.00112839	-2.3								0.00331131	2.5	1.35983e-06	0.00233223	2.99279	4.96397	8.80965	3.4822e-07	0.0011802	4.5993	1.15857e-06	0.00215274		2.5	9.6319e-07	0.00196285	5.99055	3.08176	9.68987	1.98399e-07	0.000890841	5.5019	8.28352e-07	0.00182028
10.2518	0.0057544	3.71723e-07	0.00121938	-2.24								0.00380189	2.5	1.68e-06	0.0025923	3.03026	5.15131	8.99526	4.11571e-07	0.00128308	4.7398	1.41925e-06	0.00238264		2.5	1.17024e-06	0.00216355	6.19366	3.11561	9.84072	2.32572e-07	0.000964515	5.65846	1.00068e-06	0.00200068
10.3754	0.00660693	4.33604e-07	0.00131697	-2.18								0.00436516	2.5	2.06806e-06	0.00287615	3.06852	5.3426	9.17392	4.85545e-07	0.00139362	4.88149	1.7326e-06	0.00263256		2.5	1.41727e-06	0.00238098	6.39613	3.14936	9.98457	2.72261e-07	0.00104357	5.81331	1.20526e-06	0.00219569
10.4927	0.00758578	5.05258e-07	0.00142163	-2.12								0.00501187	2.5	2.53673e-06	0.00318542	3.10737	5.53687	9.34552	5.71814e-07	0.00151237	5.02367	2.10805e-06	0.00290382		2.5	1.71117e-06	0.00261623	6.59708	3.18285	10.1215	3.18318e-07	0.00112839	5.96589	1.44755e-06	0.00240628
10.6038	0.00870964	5.88179e-07	0.00153386	-2.06								0.0057544	2.5	3.1008e-06	0.00352182	3.14663	5.73315	9.51001	6.72306e-07	0.00163989	5.16567	2.55655e-06	0.00319785		2.5	2.05993e-06	0.00287049	6.7957	3.21595	10.2518	3.71723e-07	0.00121938	6.11567	1.73383e-06	0.0026335
10.709	0.01	6.84083e-07	0.00165419	-2								0.00660693	2.5	3.77748e-06	0.00388715	3.18609	5.93047	9.66738	7.8924e-07	0.00177678	5.30687	3.0908e-06	0.00351613		2.5	2.47279e-06	0.00314502	6.99127	3.24854	10.3754	4.33604e-07	0.00131697	6.26219	2.07138e-06	0.00287846
10.8084	0.0114815	7.94946e-07	0.00178319	-1.94								0.00758578	2.5	4.58673e-06	0.00428333	3.22558	6.12789	9.81769	9.25173e-07	0.00192372	5.44668	3.72548e-06	0.0038603		2.5	2.96043e-06	0.00344118	7.18312	3.28052	10.4927	5.05258e-07	0.00142163	6.40506	2.46858e-06	0.00314234
10.9024	0.0131826	9.23038e-07	0.0019215	-1.88								0.00870964	2.5	5.5517e-06	0.00471241	3.2649	6.32452	9.96102	1.08305e-06	0.00208139	5.58457	4.47758e-06	0.00423206		2.5	3.53516e-06	0.00376041	7.37069	3.31178	10.6038	5.88179e-07	0.00153386	6.54395	2.93511e-06	0.00342643
10.991	0.0151356	1.07097e-06	0.00206976	-1.82								0.01	2.5	6.69921e-06	0.00517657	3.30391	6.51953	10.0975	1.26625e-06	0.00225055	5.72005	5.36675e-06	0.00463325		2.5	4.21124e-06	0.00410426	7.55349	3.34225	10.709	6.84083e-07	0.00165419	6.67859	3.48216e-06	0.00373211
11.0746	0.017378	1.24175e-06	0.00222868	-1.76								0.0114815	2.5	8.06029e-06	0.00567813	3.34243	6.71213	10.2273	1.47868e-06	0.00243202	5.8527	6.41569e-06	0.00506584		2.5	5.00509e-06	0.00447441	7.7311	3.37185	10.8084	7.94946e-07	0.00178319	6.80877	4.12261e-06	0.00406084
11.1534	0.0199526	1.43882e-06	0.00239902	-1.7								0.0131826	2.5	9.67081e-06	0.00621958	3.38033	6.90164	10.3505	1.72482e-06	0.00262665	5.98215	7.65062e-06	0.00553195		2.5	5.93566e-06	0.00487264	7.90319	3.40053	10.9024	9.23038e-07	0.0019215	6.93432	4.87131e-06	0.00441421
11.2276	0.0229087	1.66615e-06	0.00258159	-1.64								0.0151356	2.5	1.15722e-05	0.0068036	3.41748	7.08742	10.4673	2.00984e-06	0.00283538	6.10809	9.10178e-06	0.00603383		2.5	7.02481e-06	0.00530087	8.0695	3.42825	10.991	1.07097e-06	0.00206976	7.05513	5.74539e-06	0.00479391
11.2975	0.0263027	1.92831e-06	0.00277727	-1.58								0.017378	2.5	1.38125e-05	0.00743303	3.45379	7.26895	10.5781	2.33967e-06	0.0030592	6.23026	1.08041e-05	0.00657392		2.5	8.29775e-06	0.00576116	8.22983	3.45497	11.0746	1.24175e-06	0.00222868	7.17113	6.76458e-06	0.00520176
11.3632	0.0301995	2.23053e-06	0.00298699	-1.52								0.0199526	2.5	1.64468e-05	0.00811093	3.48915	7.44575	10.6828	2.72115e-06	0.00329918	6.34846	1.27978e-05	0.00715481		2.5	9.7835e-06	0.00625572	8.38404	3.48067	11.1534	1.43882e-06	0.00239902	7.2823	7.95161e-06	0.00563972
11.425	0.0346737	2.57885e-06	0.00321176	-1.46								0.0229087	2.5	1.9539e-05	0.00884059	3.52349	7.61745	10.7819	3.16212e-06	0.00355647	6.46253	1.51294e-05	0.0077793		2.5	1.15155e-05	0.00678691	8.53206	3.50534	11.2276	1.66615e-06	0.00258159	7.38863	9.33266e-06	0.00610988
11.483	0.0398107	2.98017e-06	0.00345263	-1.4								0.0263027	2.5	2.31627e-05	0.00962553	3.55675	7.78373	10.8755	3.67163e-06	0.0038323	6.57235	1.78523e-05	0.00845039		2.5	1.35324e-05	0.00735729	8.67386	3.52898	11.2975	1.92831e-06	0.00277727	7.49016	1.09379e-05	0.00661449
11.5375	0.0457088	3.44246e-06	0.00371077	-1.34								0.0301995	2.5	2.74028e-05	0.0104695	3.58887	7.94434	10.9638	4.26006e-06	0.00412798	6.67786	2.10282e-05	0.00917131		2.5	1.58785e-05	0.00796957	8.80945	3.55158	11.3632	2.23053e-06	0.00298699	7.58696	1.2802e-05	0.00715597
11.5887	0.0524807	3.97486e-06	0.00398741	-1.28								0.0346737	2.5	3.2357e-05	0.0113766	3.61982	8.09912	11.0471	4.93934e-06	0.00444493	6.77901	2.47282e-05	0.00994549		2.5	1.8605e-05	0.0086267	8.93888	3.57315	11.425	2.57885e-06	0.00321176	7.6791	1.49649e-05	0.00773689
11.6368	0.060256	4.58788e-06	0.00428387	-1.22								0.0398107	2.5	3.81382e-05	0.0123512	3.64959	8.24793	11.1256	5.72321e-06	0.00478465	6.87582	2.90341e-05	0.0107767		2.5	2.17707e-05	0.00933181	9.06225	3.59371	11.483	2.98017e-06	0.00345263	7.7667	1.74726e-05	0.00836005
11.6818	0.0691831	5.29357e-06	0.00460155	-1.16								0.0457088	2.5	4.48762e-05	0.0133979	3.67814	8.39071	11.1996	6.62746e-06	0.00514877	6.96829	3.404e-05	0.0116688		2.5	2.54433e-05	0.0100883	9.17965	3.61328	11.5375	3.44246e-06	0.00371077	7.84987	2.0378e-05	0.0090284
11.7241	0.0794328	6.10581e-06	0.00494199	-1.1								0.0524807	2.5	5.27207e-05	0.0145218	3.70549	8.52744	11.2692	7.67021e-06	0.00553903	7.05649	3.98546e-05	0.0126261		2.5	2.97008e-05	0.0108997	9.29124	3.63187	11.5887	3.97486e-06	0.00398741	7.92873	2.3742e-05	0.00974515
11.7637	0.0912011	7.04052e-06	0.00530679	-1.04								0.060256	2.5	6.18441e-05	0.0157282	3.73163	8.65814	11.3346	8.87233e-06	0.00595729	7.14048	4.66027e-05	0.0136532		2.5	3.46329e-05	0.0117699	9.39715	3.64953	11.6368	4.58788e-06	0.00428387	8.00344	2.76346e-05	0.0105137
11.8009	0.104713	8.11599e-06	0.00569772	-0.98								0.0691831	2.5	7.24447e-05	0.0170229	3.75657	8.78287	11.3962	1.02578e-05	0.00640555	7.22035	5.4428e-05	0.0147551		2.5	4.03428e-05	0.0127032	9.49757	3.66626	11.6818	5.29357e-06	0.00460155	8.07413	3.21363e-05	0.0113378
11.8356	0.120226	9.35326e-06	0.00611662	-0.92								0.0794328	2.5	8.47511e-05	0.0184121	3.78034	8.90172	11.454	1.18541e-05	0.00688595	7.2962	6.3496e-05	0.0159369		2.5	4.69492e-05	0.0137039	9.59267	3.68211	11.7241	6.10581e-06	0.00494199	8.14096	3.73398e-05	0.0122213
11.8682	0.138038	1.07765e-05	0.00656551	-0.86								0.0912011	2.5	9.9026e-05	0.0199024	3.80296	9.01479	11.5084	1.36929e-05	0.00740077	7.36815	7.39968e-05	0.0172043		2.5	5.45887e-05	0.0147768	9.68264	3.69711	11.7637	7.04052e-06	0.00530679	8.20408	4.33515e-05	0.0131684
11.8987	0.158489	1.24133e-05	0.00704652	-0.8								0.104713	2.5	0.000115572	0.0215009	3.82445	9.12223	11.5594	1.58105e-05	0.00795249	7.43633	8.61495e-05	0.0185634		2.5	6.34184e-05	0.0159271	9.76769	3.71128	11.8009	8.11599e-06	0.00569772	8.26365	5.0294e-05	0.0141837
11.9273	0.18197	1.42957e-05	0.00756194	-0.74								0.120226	2.5	0.000134738	0.0232153	3.84484	9.2242	11.6072	1.82488e-05	0.00854373	7.50086	0.000100206	0.0200206		2.5	7.36187e-05	0.0171603	9.848	3.72467	11.8356	9.35326e-06	0.00611662	8.31982	5.83081e-05	0.0152719
11.9541	0.20893	1.64603e-05	0.00811425	-0.68								0.138038	2.5	0.000156923	0.0250538	3.86417	9.32084	11.6521	2.10557e-05	0.00917731	7.56187	0.000116456	0.0215829		2.5	8.53973e-05	0.0184821	9.92379	3.7373	11.8682	1.07765e-05	0.00656551	8.37276	6.75555e-05	0.0164384
11.9791	0.239883	1.8949e-05	0.00870608	-0.62								0.158489	2.5	0.000182589	0.0270251	3.88247	9.41236	11.6942	2.42864e-05	0.00985626	7.61952	0.000135232	0.0232578		2.5	9.8993e-05	0.0198991	9.99525	3.74921	11.8987	1.24133e-05	0.00704652	8.42261	7.82226e-05	0.0176887
12.0025	0.275423	2.18101e-05	0.00934025	-0.56								0.18197	2.5	0.000212266	0.0291387	3.89978	9.49892	11.7337	2.80043e-05	0.0105838	7.67393	0.000156917	0.0250533		2.5	0.00011468	0.0214178	10.0626	3.76043	11.9273	1.42957e-05	0.00756194	8.46953	9.0523e-05	0.0190287
12.0244	0.316228	2.5099e-05	0.0100198	-0.5								0.20893	2.5	0.000246562	0.0314046	3.91615	9.58073	11.7707	3.22821e-05	0.0113635	7.72525	0.000181952	0.0269779		2.5	0.000132774	0.0230455	10.126	3.771	11.9541	1.64603e-05	0.00811425	8.51366	0.000104703	0.0204649
12.0449	0.363078	2.88795e-05	0.0107479	-0.44								0.239883	2.5	0.00028618	0.0338337	3.9316	9.65798	11.8054	3.72033e-05	0.0121989	7.77363	0.000210842	0.0290408		2.5	0.000153638	0.0247902	10.1856	3.78094	11.9791	1.8949e-05	0.00870608	8.55515	0.000121044	0.022004
12.0641	0.416869	3.32247e-05	0.0115282	-0.38								0.275423	2.5	0.000331924	0.0364376	3.94617	9.73086	11.8378	4.28642e-05	0.0130941	7.81919	0.000244171	0.0312519		2.5	0.000177688	0.0266599	10.2417	3.79029	12.0025	2.18101e-05	0.00934025	8.59413	0.000139872	0.0236535
12.082	0.47863	3.82185e-05	0.0123642	-0.32								0.316228	2.5	0.000384721	0.0392286	3.95991	9.79957	11.8682	4.93749e-05	0.0140535	7.86207	0.000282606	0.0336218		2.5	0.000205403	0.0286638	10.2945	3.79908	12.0244	2.5099e-05	0.0100198	8.63074	0.000161559	0.0254212
12.0987	0.549541	4.39574e-05	0.0132601	-0.26								0.363078	2.5	0.000445636	0.0422202	3.97286	9.8643	11.8967	5.68622e-05	0.0150814	7.90242	0.000326916	0.0361617		2.5	0.000237333	0.0308113	10.344	3.80734	12.0449	2.88795e-05	0.0107479	8.66511	0.000186535	0.0273155
12.1144	0.630957	5.05522e-05	0.01422	-0.2								0.416869	2.5	0.000515893	0.0454265	3.98505	9.92524	11.9233	6.54716e-05	0.0161829	7.94035	0.000377986	0.0388837		2.5	0.000274112	0.0331127	10.3906	3.8151	12.0641	3.32247e-05	0.0115282	8.69737	0.000215291	0.0293456
12.129	0.724436	5.81301e-05	0.0152486	-0.14								0.47863	2.5	0.000596899	0.048863	3.99652	9.98259	11.9483	7.53704e-05	0.0173632	7.97599	0.000436829	0.0418009		2.5	0.000316465	0.0355789	10.4343	3.82238	12.082	3.82185e-05	0.0123642	8.72762	0.000248394	0.031521
12.1427	0.831764	6.68371e-05	0.0163508	-0.08								0.549541	2.5	0.000690271	0.052546	4.0073	10.0365	11.9716	8.67505e-05	0.018628	8.00948	0.000504614	0.0449272		2.5	0.000365228	0.0382219	10.4753	3.82921	12.0987	4.39574e-05	0.0132601	8.75599	0.000286494	0.0338522
12.1555	0.954993	7.6841e-05	0.0175318	-0.02								0.630957	2.5	0.000797867	0.0564931	4.01744	10.0872	11.9934	9.98324e-05	0.0199832	8.04091	0.00058268	0.0482775		2.5	0.000421359	0.0410541	10.5137	3.83562	12.1144	5.05522e-05	0.01422	8.78259	0.000330337	0.0363504
												0.724436	2.5	0.000921823	0.0607231	4.02696	10.1348	12.0138	0.000114869	0.0214354	8.07041	0.000672568	0.0518678		2.5	0.000485962	0.0440891	10.5498	3.84163	12.129	5.81301e-05	0.0152486	8.80752	0.000380783	0.0390273
												0.831764	2.5	0.00106459	0.0652562	4.03591	10.1795	12.0329	0.000132152	0.0229915	8.09809	0.000776048	0.0557153		2.5	0.000560302	0.0473414	10.5836	3.84726	12.1427	6.68371e-05	0.0163508	8.83087	0.000438816	0.0418958
												0.954993	2.5	0.001229	0.0701141	4.0443	10.2215	12.0508	0.000152015	0.0246589	8.12405	0.000895154	0.0598383		2.5	0.000645833	0.0508265	10.6152	3.85254	12.1555	7.6841e-05	0.0175318	8.85274	0.000505568	0.0449697

## Sheet: Sup. Fig. 5 kobs vs eeL
kobs	eeL	beta	alpha								KHomo = 30	k1 = 2.5	k1 = 2.5	k1 = 2.5	k1 = 2.5
0.138175	#NUM!	0.00075129	0.0548194			Constant	value				Khetero = 10	k2 = 5	k2 = 25	k2 = 5	k2 = 25
0.138173	0.0117918	0.000751215	0.0548184	-6		KHomo	30				[Cattot] = 0.16	k2' = 5	k2' = 5	k2' = 25	k2' = 25
0.13817	0.0172823	0.000751128	0.0548172	-5.94		KHetero	10				eeL	kobs	kobs	kobs	kobs
0.138167	0.0219533	0.000751028	0.0548159	-5.88		[Cattot]	0.16				#NUM!	0.4	1.30155	0.550258	1.45181
0.138163	0.0263125	0.000750913	0.0548144	-5.82		k1	2.5				1.17918	0.4	1.30157	0.550243	1.45182
0.138159	0.0305596	0.000750781	0.0548126	-5.76		k2	0.025				1.72823	0.4	1.3016	0.550226	1.45183
0.138154	0.034802	0.00075063	0.0548106	-5.7		k2'	0				2.19533	0.4	1.30164	0.550206	1.45184
0.138148	0.0391089	0.000750457	0.0548083	-5.64		k2/k1	0.01				2.63125	0.4	1.30167	0.550183	1.45186
0.138142	0.0435308	0.000750257	0.0548057	-5.58		k2'/k1	0				3.05596	0.4	1.30172	0.550156	1.45187
0.138134	0.0481083	0.000750028	0.0548027	-5.52		alphamin	0.0548194				3.4802	0.4	1.30177	0.550126	1.45189
0.138126	0.0528765	0.000749766	0.0547992	-5.46							3.91089	0.4	1.30183	0.550091	1.45192
0.138116	0.0578674	0.000749464	0.0547952	-5.4							4.35308	0.4	1.30189	0.550051	1.45194
0.138105	0.0631113	0.000749118	0.0547907	-5.34							4.81083	0.4	1.30197	0.550006	1.45197
0.138092	0.068638	0.00074872	0.0547854	-5.28							5.28765	0.4	1.30205	0.549953	1.45201
0.138077	0.0744772	0.000748264	0.0547794	-5.22							5.78674	0.4	1.30215	0.549893	1.45205
0.13806	0.0806592	0.00074774	0.0547725	-5.16							6.31113	0.4	1.30227	0.549824	1.45209
0.13804	0.0872151	0.000747139	0.0547645	-5.1							6.8638	0.4	1.3024	0.549744	1.45215
0.138018	0.0941772	0.000746448	0.0547554	-5.04							7.44772	0.4	1.30255	0.549653	1.45221
0.137992	0.101579	0.000745655	0.054745	-4.98							8.06592	0.4	1.30273	0.549548	1.45228
0.137962	0.109456	0.000744745	0.0547329	-4.92							8.72151	0.4	1.30293	0.549428	1.45235
0.137928	0.117845	0.000743701	0.0547191	-4.86							9.41772	0.4	1.30316	0.54929	1.45245
0.137889	0.126785	0.000742502	0.0547033	-4.8							10.1579	0.4	1.30342	0.549131	1.45255
0.137844	0.136318	0.000741126	0.0546851	-4.74							10.9456	0.4	1.30372	0.548949	1.45267
0.137792	0.146486	0.000739546	0.0546642	-4.68							11.7845	0.4	1.30407	0.54874	1.45281
0.137733	0.157336	0.000737733	0.0546402	-4.62							12.6785	0.4	1.30447	0.5485	1.45297
0.137665	0.168916	0.000735652	0.0546127	-4.56							13.6318	0.4	1.30492	0.548225	1.45315
0.137587	0.181276	0.000733264	0.054581	-4.5							14.6486	0.4	1.30545	0.547909	1.45336
0.137497	0.194471	0.000730523	0.0545447	-4.44							15.7336	0.4	1.30605	0.547547	1.4536
0.137394	0.208556	0.000727379	0.054503	-4.38							16.8916	0.4	1.30674	0.54713	1.45387
0.137276	0.223589	0.000723771	0.0544552	-4.32							18.1276	0.4	1.30754	0.546653	1.45419
0.137141	0.239634	0.000719633	0.0544002	-4.26							19.4471	0.4	1.30845	0.546105	1.45455
0.136985	0.256752	0.000714885	0.0543371	-4.2							20.8556	0.4	1.30949	0.545476	1.45497
0.136806	0.275009	0.00070944	0.0542647	-4.14							22.3589	0.4	1.31069	0.544754	1.45545
0.136601	0.294474	0.000703196	0.0541815	-4.08							23.9634	0.4	1.31207	0.543927	1.456
0.136365	0.315215	0.000696038	0.054086	-4.02							25.6752	0.4	1.31365	0.542977	1.45663
0.136094	0.337301	0.000687832	0.0539764	-3.96							27.5009	0.4	1.31547	0.541888	1.45735
0.135783	0.360802	0.000678428	0.0538505	-3.9							29.4474	0.4	1.31755	0.540639	1.45818
0.135427	0.385784	0.000667655	0.0537059	-3.84							31.5215	0.4	1.31993	0.539208	1.45914
0.135017	0.412311	0.000655316	0.05354	-3.78							33.7301	0.4	1.32267	0.537566	1.46024
0.134546	0.440444	0.00064119	0.0533494	-3.72							36.0802	0.4	1.32581	0.535686	1.4615
0.134006	0.470232	0.000625025	0.0531306	-3.66							38.5784	0.4	1.32941	0.533531	1.46294
0.133386	0.501716	0.000606536	0.0528795	-3.6							41.2311	0.4	1.33354	0.531063	1.4646
0.132674	0.534923	0.000585402	0.052591	-3.54							44.0444	0.4	1.33827	0.528238	1.46651
0.131856	0.569856	0.000561259	0.0522599	-3.48							47.0232	0.4	1.34369	0.525005	1.46869
0.130917	0.606495	0.000533701	0.0518797	-3.42							50.1716	0.4	1.3499	0.521307	1.47121
0.129839	0.644786	0.000502275	0.0514432	-3.36							53.4923	0.4	1.35701	0.51708	1.47409
0.128602	0.684629	0.000466474	0.050942	-3.3							56.9856	0.4	1.36515	0.512252	1.4774
0.12718	0.725871	0.000425742	0.0503666	-3.24							60.6495	0.4	1.37446	0.50674	1.4812
0.125549	0.768289	0.000379464	0.0497059	-3.18							64.4786	0.4	1.38511	0.500455	1.48557
0.123675	0.811575	0.000326977	0.0489473	-3.12							68.4629	0.4	1.39728	0.493295	1.49058
0.121523	0.85531	0.000267565	0.0480764	-3.06							72.5871	0.4	1.41119	0.485148	1.49633
0.119052	0.898945	0.000200473	0.0470764	-3							76.8289	0.4	1.42705	0.475893	1.50294
0.116215	0.941769	0.000124922	0.0459282	-2.94							81.1575	0.4	1.44513	0.465395	1.51053
0.112957	0.982871	4.01275e-05	0.0446099	-2.88							85.531	0.4	1.46572	0.453513	1.51924
0.109216	1.0211	-5.46574e-05	0.0430964	-2.82							89.8945	0.4	1.48914	0.440095	1.52924
0.104919	1.05503	-0.000160095	0.0413586	-2.76							94.1769	0.4	1.51573	0.424984	1.54072
											98.2871	0.4	1.54588	0.408026	1.5539
											102.11	0.4	1.57997	0.389069	1.56904
											105.503	0.4	1.61843	0.367981	1.58641
