# Supplementary material for: Hyperpositive non-linear effects: enantiodivergence and modelling
Source: Royal Society of Chemistry journal article supplement (doi:10.1039/d0sc04724d), 2020-01-01
Supplement: d0sc04724d4.xlsx [file d0sc04724d4.xlsx]

## Sheet: Model I eeP vs Cattot
eeP	[Cattot]	γ
99.3464	0.0001	0.0032785		Constant	value
96.8526	0.0005	0.0159887		k2/k1	1
93.9734	0.001	0.0310694		ee1	100
91.3178	0.0015	0.0453811		ee2	-100
88.8519	0.002	0.0590307		KHomo	33
86.5493	0.0025	0.0721025
84.3889	0.003	0.084664
82.3535	0.0035	0.0967708
80.429	0.004	0.108469
78.6038	0.0045	0.119797
76.8677	0.005	0.130789
75.2124	0.0055	0.141472
73.6306	0.006	0.151871
72.116	0.0065	0.162007
70.663	0.007	0.1719
69.2668	0.0075	0.181567
67.9231	0.008	0.191022
66.6281	0.0085	0.200278
65.3785	0.009	0.209347
64.1711	0.0095	0.218241
63.0032	0.01	0.22697
53.0484	0.015	0.306776
45.2962	0.02	0.376498
38.9659	0.025	0.439202
33.631	0.03	0.496659
29.0323	0.035	0.55
25	0.04	0.6
21.4168	0.045	0.647218
18.1983	0.05	0.692072
15.2814	0.055	0.734886
12.6181	0.06	0.775914
10.1708	0.065	0.815364
7.90956	0.07	0.853404
5.81028	0.075	0.890175
3.85307	0.08	0.925798
2.02146	0.085	0.960372
0.301631	0.09	0.993986
-1.31812	0.095	1.02671
-2.84779	0.1	1.05863
-5.67012	0.11	1.12022
-8.22154	0.12	1.17916
-10.5452	0.13	1.23577
-12.6749	0.14	1.29029
-14.6376	0.15	1.34295
-16.4553	0.16	1.39393
-18.1458	0.17	1.44337
-19.7241	0.18	1.49141
-21.2026	0.19	1.53816
-22.592	0.2	1.58371
-23.9012	0.21	1.62816
-25.1382	0.22	1.67159
-26.3094	0.23	1.71405
-27.421	0.24	1.75562
-28.4779	0.25	1.79634
-29.4847	0.26	1.83626
-30.4455	0.27	1.87544
-31.3637	0.28	1.91391
-32.2425	0.29	1.9517
-33.0849	0.3	1.98886
-33.8933	0.31	2.02541
-34.6701	0.32	2.06138
-35.4173	0.33	2.09681
-36.1369	0.34	2.1317
-36.8306	0.35	2.16609
-37.5	0.36	2.2
-38.1465	0.37	2.23345
-38.7714	0.38	2.26645
-39.3759	0.39	2.29902
-39.9612	0.4	2.33118
-42.6331	0.45	2.48633
-44.9512	0.5	2.63314
-46.9894	0.55	2.77283
-48.8012	0.6	2.90634
-50.4267	0.65	3.03443
-51.8966	0.7	3.15771
-53.2348	0.75	3.27668
-54.4603	0.8	3.39177
-55.5884	0.85	3.50333
-56.6318	0.9	3.61167
-57.6006	0.95	3.71705
-58.5037	1	3.81971

## Sheet: Model II eeP vs eeL
eeP	eeL	β	α
1.02006e-08	2.69751e-10	1.47742e-08	0.000243099		αmin	0.000243099
0.0481687	0.00127554	1.47737e-08	0.000243399
0.0680525	0.00180454	1.47732e-08	0.000243699		Constant	value
0.0832636	0.0022109	1.47727e-08	0.000243999		k1	10
0.107278	0.00285632	1.47717e-08	0.000244599		k2	10
0.12668	0.00338208	1.47707e-08	0.000245199		k2'	0
0.143357	0.00383768	1.47697e-08	0.000245799		KHomo	100
0.167264	0.00449789	1.47681e-08	0.000246799		KHetero	330000
0.187899	0.00507548	1.47664e-08	0.000247799		ee1	1
0.206249	0.0055961	1.47647e-08	0.000248799		ee2	-1
0.252341	0.00693841	1.47597e-08	0.000251799		[Cattot]	0.01
0.289835	0.00807491	1.47547e-08	0.000254799
0.349836	0.0100022	1.47447e-08	0.000260799
0.397446	0.0116552	1.47346e-08	0.000266799
0.437021	0.013138	1.47246e-08	0.000272799
0.470831	0.0145031	1.47145e-08	0.000278799
0.500246	0.0157813	1.47043e-08	0.000284799
0.541845	0.0177692	1.46874e-08	0.000294799
0.576399	0.0196264	1.46704e-08	0.000304799
0.605616	0.0213876	1.46534e-08	0.000314799
0.630645	0.0230752	1.46363e-08	0.000324799
0.687767	0.0278333	1.45846e-08	0.000354799
0.726899	0.0322981	1.45324e-08	0.000384799
0.75466	0.0365872	1.44797e-08	0.000414799
0.789438	0.0448725	1.43725e-08	0.000474799
0.807969	0.0529674	1.42632e-08	0.000534799
0.817277	0.0609991	1.41517e-08	0.000594799
0.821283	0.074417	1.3961e-08	0.000694799
0.817359	0.0880083	1.37642e-08	0.000794799
0.809182	0.101857	1.35614e-08	0.000894799
0.798583	0.116009	1.33525e-08	0.000994799
0.786555	0.130493	1.31375e-08	0.0010948
0.773674	0.145327	1.29165e-08	0.0011948
0.746624	0.17609	1.24562e-08	0.0013948
0.718986	0.208358	1.19717e-08	0.0015948
0.691443	0.242164	1.14629e-08	0.0017948
0.66432	0.277527	1.09299e-08	0.0019948
0.637775	0.31446	1.03726e-08	0.0021948
0.611885	0.35297	9.79107e-09	0.0023948
0.574338	0.413704	8.87328e-09	0.0026948
0.538345	0.478012	7.90091e-09	0.0029948
0.503867	0.545901	6.87396e-09	0.0032948
0.47084	0.617377	5.79243e-09	0.0035948
0.439193	0.692443	4.65632e-09	0.0038948
0.408853	0.771103	3.46564e-09	0.0041948
0.379748	0.853357	2.22037e-09	0.0044948
0.351807	0.939207	9.20532e-10	0.0047948
0.324967	1.02865	-4.33889e-10	0.0050948
0.299165	1.1217	-1.84289e-09	0.0053948
0.274343	1.21834	-3.30647e-09	0.0056948
0.250449	1.31859	-4.82462e-09	0.0059948
0.227431	1.42243	-6.39736e-09	0.0062948
0.205243	1.52987	-8.02467e-09	0.0065948
0.183841	1.64091	-9.70656e-09	0.0068948
0.163184	1.75556	-1.1443e-08	0.0071948
0.143235	1.8738	-1.32341e-08	0.0074948
0.123958	1.99565	-1.50797e-08	0.0077948
0.10532	2.12109	-1.69799e-08	0.0080948
0.0872893	2.25014	-1.89347e-08	0.0083948
0.069837	2.38279	-2.09441e-08	0.0086948
0.0529357	2.51904	-2.3008e-08	0.0089948
0.0365598	2.65889	-2.51265e-08	0.0092948
0.0206853	2.80234	-2.72996e-08	0.0095948
0.00528949	2.9494	-2.95273e-08	0.0098948
-0.0096489	3.10005	-3.18096e-08	0.0101948
-0.0241499	3.25431	-3.41464e-08	0.0104948
-0.0382325	3.41217	-3.65378e-08	0.0107948
-0.0519146	3.57363	-3.89838e-08	0.0110948
-0.0652128	3.7387	-4.14844e-08	0.0113948
-0.0781432	3.90736	-4.40395e-08	0.0116948
-0.0907208	4.07963	-4.66492e-08	0.0119948
-0.10296	4.2555	-4.93135e-08	0.0122948
-0.114874	4.43497	-5.20324e-08	0.0125948
-0.126476	4.61804	-5.48059e-08	0.0128948
-0.137777	4.80471	-5.76339e-08	0.0131948
-0.14879	4.99499	-6.05165e-08	0.0134948
-0.159525	5.18887	-6.34537e-08	0.0137948
-0.169992	5.38635	-6.64455e-08	0.0140948
-0.180203	5.58743	-6.94919e-08	0.0143948
-0.190165	5.79211	-7.25928e-08	0.0146948
-0.199887	6.0004	-7.57483e-08	0.0149948
-0.209379	6.21229	-7.89584e-08	0.0152948
-0.218649	6.42778	-8.22231e-08	0.0155948
-0.227704	6.64687	-8.55423e-08	0.0158948
-0.236551	6.86956	-8.89162e-08	0.0161948
-0.245198	7.09586	-9.23446e-08	0.0164948
-0.253651	7.32576	-9.58275e-08	0.0167948
-0.261917	7.55926	-9.93651e-08	0.0170948
-0.270001	7.79636	-1.02957e-07	0.0173948
-0.277911	8.03707	-1.06604e-07	0.0176948
-0.285651	8.28137	-1.10305e-07	0.0179948
-0.293227	8.52928	-1.14061e-07	0.0182948
-0.300644	8.78079	-1.17872e-07	0.0185948
-0.307906	9.0359	-1.21737e-07	0.0188948
-0.31502	9.29462	-1.25656e-07	0.0191948
-0.321989	9.55694	-1.2963e-07	0.0194948
-0.328817	9.82286	-1.33659e-07	0.0197948
-0.335509	10.0924	-1.37743e-07	0.0200948
-0.342069	10.3655	-1.4188e-07	0.0203948
-0.348501	10.6422	-1.46073e-07	0.0206948
-0.354808	10.9226	-1.5032e-07	0.0209948
-0.360995	11.2065	-1.54622e-07	0.0212948
-0.367063	11.494	-1.58978e-07	0.0215948
-0.373018	11.7851	-1.63389e-07	0.0218948
-0.378862	12.0799	-1.67854e-07	0.0221948
-0.384597	12.3782	-1.72374e-07	0.0224948
-0.390228	12.6802	-1.76949e-07	0.0227948
-0.395757	12.9857	-1.81578e-07	0.0230948
-0.401186	13.2949	-1.86262e-07	0.0233948
-0.406519	13.6076	-1.91e-07	0.0236948
-0.411757	13.9239	-1.95793e-07	0.0239948
-0.416904	14.2439	-2.0064e-07	0.0242948
-0.421961	14.5675	-2.05542e-07	0.0245948
-0.426932	14.8946	-2.10499e-07	0.0248948
-0.431817	15.2254	-2.1551e-07	0.0251948
-0.43662	15.5597	-2.20576e-07	0.0254948
-0.441343	15.8977	-2.25696e-07	0.0257948
-0.445987	16.2393	-2.30871e-07	0.0260948
-0.450555	16.5844	-2.361e-07	0.0263948
-0.455047	16.9332	-2.41385e-07	0.0266948
-0.459467	17.2856	-2.46723e-07	0.0269948
-0.463816	17.6415	-2.52116e-07	0.0272948
-0.468096	18.0011	-2.57564e-07	0.0275948
-0.472307	18.3643	-2.63067e-07	0.0278948
-0.473696	18.4861	-2.64913e-07	0.0279948
-0.484551	19.4754	-2.79901e-07	0.0287948
-0.494967	20.4903	-2.95278e-07	0.0295948
-0.504971	21.5308	-3.11042e-07	0.0303948
-0.514586	22.597	-3.27195e-07	0.0311948
-0.523834	23.6887	-3.43736e-07	0.0319948
-0.532737	24.8061	-3.60665e-07	0.0327948
-0.541313	25.9491	-3.77982e-07	0.0335948
-0.549579	27.1176	-3.95687e-07	0.0343948
-0.557553	28.3119	-4.1378e-07	0.0351948
-0.56525	29.5317	-4.32262e-07	0.0359948
-0.572683	30.7771	-4.51131e-07	0.0367948
-0.579867	32.0482	-4.70389e-07	0.0375948
-0.586813	33.3448	-4.90035e-07	0.0383948
-0.593533	34.6671	-5.10069e-07	0.0391948
-0.600038	36.015	-5.30491e-07	0.0399948
-0.606338	37.3885	-5.51301e-07	0.0407948
-0.608649	37.9102	-5.59205e-07	0.0410948
-0.610934	38.4355	-5.67163e-07	0.0413948
-0.613192	38.9644	-5.75176e-07	0.0416948
-0.615424	39.4968	-5.83244e-07	0.0419948
-0.617631	40.0329	-5.91366e-07	0.0422948
-0.619812	40.5726	-5.99542e-07	0.0425948
-0.621968	41.1159	-6.07774e-07	0.0428948
-0.624101	41.6628	-6.1606e-07	0.0431948
-0.626209	42.2133	-6.244e-07	0.0434948
-0.628294	42.7674	-6.32795e-07	0.0437948

## Sheet: Figure 5a ee1 ee2
	ee2 = 80	ee2 = 40	ee2 = 0	ee2 = -40	ee2 = -80	ee2 = -100		avec	k1/k2	ee1	ee2	KHomo
[Cattot]	eeP	eeP	eeP	eeP	eeP	eeP			1	100	var	33
0.0001	99.9346	99.8039	99.6732	99.5425	99.4118	99.3464
0.0005	99.6853	99.0558	98.4263	97.7968	97.1673	96.8526
0.001	99.3973	98.192	96.9867	95.7814	94.576	93.9734
0.0015	99.1318	97.3953	95.6589	93.9225	92.186	91.3178
0.002	98.8852	96.6556	94.426	92.1964	89.9667	88.8519
0.0025	98.6549	95.9648	93.2747	90.5845	87.8944	86.5493
0.003	98.4389	95.3167	92.1944	89.0722	85.95	84.3889
0.0035	98.2354	94.7061	91.1768	87.6475	84.1182	82.3535
0.004	98.0429	94.1287	90.2145	86.3003	82.3861	80.429
0.0045	97.8604	93.5811	89.3019	85.0226	80.7434	78.6038
0.005	97.6868	93.0603	88.4339	83.8074	79.1809	76.8677
0.0055	97.5212	92.5637	87.6062	82.6487	77.6912	75.2124
0.006	97.3631	92.0892	86.8153	81.5414	76.2675	73.6306
0.0065	97.2116	91.6348	86.058	80.4812	74.9044	72.116
0.007	97.0663	91.1989	85.3315	79.4641	73.5967	70.663
0.0075	96.9267	90.78	84.6334	78.4867	72.3401	69.2668
0.008	96.7923	90.3769	83.9615	77.5462	71.1308	67.9231
0.0085	96.6628	89.9884	83.3141	76.6397	69.9653	66.6281
0.009	96.5378	89.6135	82.6892	75.7649	68.8406	65.3785
0.0095	96.4171	89.2513	82.0855	74.9198	67.754	64.1711
0.01	96.3003	88.901	81.5016	74.1023	66.7029	63.0032
0.015	95.3048	85.9145	76.5242	67.1339	57.7435	53.0484
0.02	94.5296	83.5889	72.6481	61.7074	50.7666	45.2962
0.025	93.8966	81.6898	69.4829	57.2761	45.0693	38.9659
0.03	93.3631	80.0893	66.8155	53.5417	40.2679	33.631
0.035	92.9032	78.7097	64.5161	50.3226	36.129	29.0323
0.04	92.5	77.5	62.5	47.5	32.5	25
0.045	92.1417	76.4251	60.7084	44.9918	29.2752	21.4168
0.05	91.8198	75.4595	59.0991	42.7388	26.3784	18.1983
0.055	91.5281	74.5844	57.6407	40.697	23.7532	15.2814
0.06	91.2618	73.7854	56.309	38.8326	21.3562	12.6181
0.065	91.0171	73.0512	55.0854	37.1195	19.1537	10.1708
0.07	90.791	72.3729	53.9548	35.5367	17.1186	7.90956
0.075	90.581	71.7431	52.9051	34.0672	15.2293	5.81028
0.08	90.3853	71.1559	51.9265	32.6972	13.4678	3.85307
0.085	90.2021	70.6064	51.0107	31.415	11.8193	2.02146
0.09	90.0302	70.0905	50.1508	30.2111	10.2715	0.301631
0.095	89.8682	69.6046	49.3409	29.0773	8.81369	-1.31812
0.1	89.7152	69.1457	48.5761	28.0066	7.43699	-2.84779
0.11	89.433	68.299	47.1649	26.0309	4.89689	-5.67012
0.12	89.1778	67.5335	45.8892	24.2449	2.60061	-8.22154
0.13	88.9455	66.8364	44.7274	22.6184	0.509327	-10.5452
0.14	88.7325	66.1975	43.6626	21.1276	-1.40741	-12.6749
0.15	88.5362	65.6087	42.6812	19.7536	-3.17388	-14.6376
0.16	88.3545	65.0634	41.7723	18.4813	-4.80978	-16.4553
0.17	88.1854	64.5563	40.9271	17.2979	-6.33124	-18.1458
0.18	88.0276	64.0828	40.138	16.1931	-7.75168	-19.7241
0.19	87.8797	63.6392	39.3987	15.1582	-9.08236	-21.2026
0.2	87.7408	63.2224	38.704	14.1856	-10.3328	-22.592
0.21	87.6099	62.8296	38.0494	13.2691	-11.5111	-23.9012
0.22	87.4862	62.4586	37.4309	12.4033	-12.6243	-25.1382
0.23	87.3691	62.1072	36.8453	11.5834	-13.6785	-26.3094
0.24	87.2579	61.7737	36.2895	10.8053	-14.6789	-27.421
0.25	87.1522	61.4566	35.7611	10.0655	-15.6301	-28.4779
0.26	87.0515	61.1546	35.2576	9.3607	-16.5362	-29.4847
0.27	86.9555	60.8664	34.7773	8.68818	-17.4009	-30.4455
0.28	86.8636	60.5909	34.3182	8.04543	-18.2273	-31.3637
0.29	86.7757	60.3272	33.8787	7.43023	-19.0183	-32.2425
0.3	86.6915	60.0745	33.4576	6.84058	-19.7764	-33.0849
0.31	86.6107	59.832	33.0533	6.27469	-20.504	-33.8933
0.32	86.533	59.599	32.665	5.73094	-21.2031	-34.6701
0.33	86.4583	59.3748	32.2913	5.20786	-21.8756	-35.4173
0.34	86.3863	59.1589	31.9315	4.70414	-22.5232	-36.1369
0.35	86.3169	58.9508	31.5847	4.21855	-23.1476	-36.8306
0.36	86.25	58.75	31.25	3.75	-23.75	-37.5
0.37	86.1854	58.5561	30.9268	3.29747	-24.3318	-38.1465
0.38	86.1229	58.3686	30.6143	2.86004	-24.8942	-38.7714
0.39	86.0624	58.1872	30.312	2.43685	-25.4383	-39.3759
0.4	86.0039	58.0116	30.0194	2.02713	-25.9651	-39.9612
0.45	85.7367	57.2101	28.6835	0.156845	-28.3698	-42.6331
0.5	85.5049	56.5146	27.5244	-1.46585	-30.4561	-44.9512
0.55	85.3011	55.9032	26.5053	-2.89257	-32.2905	-46.9894
0.6	85.1199	55.3596	25.5994	-4.16085	-33.9211	-48.8012
0.65	84.9573	54.872	24.7866	-5.29872	-35.3841	-50.4267
0.7	84.8103	54.431	24.0517	-6.32763	-36.707	-51.8966
0.75	84.6765	54.0296	23.3826	-7.26436	-37.9113	-53.2348
0.8	84.554	53.6619	22.7699	-8.1222	-39.0143	-54.4603
0.85	84.4412	53.3235	22.2058	-8.91191	-40.0296	-55.5884
0.9	84.3368	53.0105	21.6841	-9.64224	-40.9686	-56.6318
0.95	84.2399	52.7198	21.1997	-10.3204	-41.8406	-57.6006
1	84.1496	52.4489	20.7482	-10.9526	-42.6533	-58.5037

## Sheet: Figure 5b KHomo
	KHomo = 0,1	KHomo = 1	KHomo = 3	KHomo = 10	KHomo = 33	KHomo = 100	KHomo = 1000		k1/k2	ee1	ee2	KHomo
[Cattot]	eeP	eeP	eeP	eeP	eeP	eeP	eeP		1	100	-100	var
0.0001	99.998	99.98	99.9401	99.8006	99.3464	98.0575	84.2621
0.0005	99.99	99.9001	99.7013	99.0147	96.8526	91.2404	52.7864
0.001	99.98	99.8006	99.4053	98.0575	93.9734	84.2621	33.3333
0.0015	99.97	99.7013	99.1119	97.1269	91.3178	78.4424	21.1103
0.002	99.96	99.6024	98.8211	96.2211	88.8519	73.4436	12.3106
0.0025	99.95	99.5037	98.5327	95.339	86.5493	69.0599	5.50505
0.003	99.9401	99.4053	98.2468	94.4791	84.3889	65.1559	0
0.0035	99.9301	99.3072	97.9633	93.6403	82.3535	61.6371	-4.59341
0.004	99.9201	99.2094	97.6822	92.8216	80.429	58.435	-8.51458
0.0045	99.9101	99.1119	97.4034	92.0219	78.6038	55.498	-11.9211
0.005	99.9001	99.0147	97.1269	91.2404	76.8677	52.7864	-14.9219
0.0055	99.8902	98.9177	96.8526	90.4762	75.2124	50.2689	-17.5955
0.006	99.8802	98.8211	96.5805	89.7285	73.6306	47.9203	-20
0.0065	99.8703	98.7247	96.3106	88.9965	72.116	45.72	-22.1798
0.007	99.8603	98.6285	96.0429	88.2796	70.663	43.6512	-24.1694
0.0075	99.8503	98.5327	95.7772	87.5772	69.2668	41.6995	-25.9962
0.008	99.8404	98.4371	95.5136	86.8886	67.9231	39.8529	-27.682
0.0085	99.8304	98.3418	95.252	86.2133	66.6281	38.1013	-29.245
0.009	99.8205	98.2468	94.9924	85.5508	65.3785	36.4358	-30.7
0.0095	99.8105	98.152	94.7348	84.9006	64.1711	34.8487	-32.0592
0.01	99.8006	98.0575	94.4791	84.2621	63.0032	33.3333	-33.3333
0.015	99.7013	97.1269	92.0219	78.4424	53.0484	21.1103	-42.8571
0.02	99.6024	96.2211	89.7285	73.4436	45.2962	12.3106	-49.0075
0.025	99.5037	95.339	87.5772	69.0599	38.9659	5.50505	-53.4273
0.03	99.4053	94.4791	85.5508	65.1559	33.631	0	-56.8132
0.035	99.3072	93.6403	83.6351	61.6371	29.0323	-4.59341	-59.5204
0.04	99.2094	92.8216	81.8182	58.435	25	-8.51458	-61.7526
0.045	99.1119	92.0219	80.0901	55.498	21.4168	-11.9211	-63.6364
0.05	99.0147	91.2404	78.4424	52.7864	18.1983	-14.9219	-65.2551
0.055	98.9177	90.4762	76.8677	50.2689	15.2814	-17.5955	-66.6667
0.06	98.8211	89.7285	75.3598	47.9203	12.6181	-20	-67.9124
0.065	98.7247	88.9965	73.913	45.72	10.1708	-22.1798	-69.0228
0.07	98.6285	88.2796	72.5227	43.6512	7.90956	-24.1694	-70.0211
0.075	98.5327	87.5772	71.1845	41.6995	5.81028	-25.9962	-70.9253
0.08	98.4371	86.8886	69.8946	39.8529	3.85307	-27.682	-71.7494
0.085	98.3418	86.2133	68.6497	38.1013	2.02146	-29.245	-72.5048
0.09	98.2468	85.5508	67.4467	36.4358	0.301631	-30.7	-73.2006
0.095	98.152	84.9006	66.2829	34.8487	-1.31812	-32.0592	-73.8444
0.1	98.0575	84.2621	65.1559	33.3333	-2.84779	-33.3333	-74.4425
0.11	97.8693	83.019	63.0032	30.4952	-5.67012	-35.6602	-75.5214
0.12	97.6822	81.8182	60.9732	27.8821	-8.22154	-37.7377	-76.4706
0.13	97.496	80.6568	59.0527	25.4629	-10.5452	-39.6087	-77.3143
0.14	97.3109	79.5323	57.2308	23.2125	-12.6749	-41.3066	-78.071
0.15	97.1269	78.4424	55.498	21.1103	-14.6376	-42.8571	-78.7547
0.16	96.9438	77.3849	53.8462	19.1392	-16.4553	-44.2812	-79.3767
0.17	96.7616	76.3579	52.2683	17.2849	-18.1458	-45.5956	-79.9457
0.18	96.5805	75.3598	50.7581	15.5354	-19.7241	-46.8141	-80.469
0.19	96.4003	74.3888	49.3104	13.8803	-21.2026	-47.9482	-80.9524
0.2	96.2211	73.4436	47.9203	12.3106	-22.592	-49.0075	-81.4008
0.21	96.0429	72.5227	46.5835	10.8186	-23.9012	-50	-81.8182
0.22	95.8655	71.625	45.2962	9.39764	-25.1382	-50.9327	-82.2081
0.23	95.6891	70.7494	44.0551	8.04178	-26.3094	-51.8115	-82.5734
0.24	95.5136	69.8946	42.8571	6.74579	-27.421	-52.6415	-82.9166
0.25	95.339	69.0599	41.6995	5.50505	-28.4779	-53.4273	-83.2399
0.26	95.1652	68.2442	40.5796	4.31544	-29.4847	-54.1727	-83.5452
0.27	94.9924	67.4467	39.4953	3.17328	-30.4455	-54.8811	-83.834
0.28	94.8204	66.6667	38.4445	2.07526	-31.3637	-55.5556	-84.1078
0.29	94.6493	65.9033	37.4252	1.0184	-32.2425	-56.1988	-84.3679
0.3	94.4791	65.1559	36.4358	0	-33.0849	-56.8132	-84.6154
0.31	94.3097	64.4238	35.4746	-0.982379	-33.8933	-57.4009	-84.8512
0.32	94.1411	63.7064	34.5401	-1.93096	-34.6701	-57.9638	-85.0764
0.33	93.9734	63.0032	33.631	-2.84779	-35.4173	-58.5037	-85.2916
0.34	93.8064	62.3136	32.746	-3.7347	-36.1369	-59.0221	-85.4976
0.35	93.6403	61.6371	31.8839	-4.59341	-36.8306	-59.5204	-85.695
0.36	93.475	60.9732	31.0437	-5.42548	-37.5	-60	-85.8844
0.37	93.3105	60.3214	30.2243	-6.23235	-38.1465	-60.462	-86.0664
0.38	93.1468	59.6814	29.4248	-7.01535	-38.7714	-60.9074	-86.2414
0.39	92.9838	59.0527	28.6443	-7.77571	-39.3759	-61.3374	-86.4098
0.4	92.8216	58.435	27.8821	-8.51458	-39.9612	-61.7526	-86.5721
0.45	92.0219	55.498	24.3179	-11.9211	-42.6331	-63.6364	-87.3033
0.5	91.2404	52.7864	21.1103	-14.9219	-44.9512	-65.2551	-87.9252
0.55	90.4762	50.2689	18.1983	-17.5955	-46.9894	-66.6667	-88.4627
0.6	89.7285	47.9203	15.5354	-20	-48.8012	-67.9124	-88.9333
0.65	88.9965	45.72	13.0852	-22.1798	-50.4267	-69.0228	-89.3501
0.7	88.2796	43.6512	10.8186	-24.1694	-51.8966	-70.0211	-89.7225
0.75	87.5772	41.6995	8.71192	-25.9962	-53.2348	-70.9253	-90.0579
0.8	86.8886	39.8529	6.74579	-27.682	-54.4603	-71.7494	-90.3622
0.85	86.2133	38.1013	4.90409	-29.245	-55.5884	-72.5048	-90.6398
0.9	85.5508	36.4358	3.17328	-30.7	-56.6318	-73.2006	-90.8945
0.95	84.9006	34.8487	1.54186	-32.0592	-57.6006	-73.8444	-91.1292
1	84.2621	33.3333	0	-33.3333	-58.5037	-74.4425	-91.3465

## Sheet: Figure 5c k1 k2
	k2/k1 = 0.01	k2/k1 = 0.1	k2/k1 = 0.25	k2/k1 = 0.5	k2/k1 = 1	k2/k1 = 2	k2/k1 = 10		k2/k1	ee1	ee2	KHomo
[Cattot]	eeP	eeP	eeP	eeP	eeP	eeP	eeP		var	100	-100	33
0.0001	99.9934	99.9345	99.8362	99.6727	99.3464	98.6971	93.6511
0.0005	99.968	99.6807	99.2037	98.4138	96.8526	93.8027	72.4306
0.001	99.9379	99.3805	98.4585	96.9406	93.9734	88.2993	52.5909
0.0015	99.9093	99.0965	97.7564	95.5626	91.3178	83.358	37.5695
0.002	99.882	98.8263	97.0914	94.2662	88.8519	78.881	25.7618
0.0025	99.8559	98.5683	96.4587	93.0406	86.5493	74.7939	16.2098
0.003	99.8308	98.3209	95.8545	91.8774	84.3889	71.0384	8.30481
0.0035	99.8066	98.0831	95.2758	90.7695	82.3535	67.5685	1.64109
0.004	99.7833	97.8539	94.7197	89.7111	80.429	64.3469	-4.06246
0.0045	99.7607	97.6324	94.1843	88.6973	78.6038	61.3431	-9.00705
0.005	99.7388	97.418	93.6676	87.7239	76.8677	58.5317	-13.3406
0.0055	99.7175	97.21	93.1681	86.7874	75.2124	55.8916	-17.1745
0.006	99.6967	97.008	92.6842	85.8848	73.6306	53.4047	-20.5942
0.0065	99.6765	96.8115	92.2149	85.0133	72.116	51.0557	-23.6662
0.007	99.6568	96.6201	91.7591	84.1705	70.663	48.8316	-26.4437
0.0075	99.6375	96.4334	91.3158	83.3544	69.2668	46.7207	-28.9689
0.008	99.6187	96.2512	90.8842	82.5632	67.9231	44.7133	-31.2766
0.0085	99.6002	96.0731	90.4636	81.7952	66.6281	42.8005	-33.395
0.009	99.5822	95.8989	90.0532	81.0489	65.3785	40.9747	-35.3478
0.0095	99.5645	95.7284	89.6525	80.323	64.1711	39.229	-37.1546
0.01	99.5471	95.5614	89.2609	79.6163	63.0032	37.5573	-38.8322
0.015	99.3883	94.0471	85.7538	73.4022	53.0484	23.9501	-50.8329
0.02	99.2498	92.7433	82.7945	68.3149	45.2962	14.0904	-58.0271
0.025	99.1254	91.5855	80.2126	63.988	38.9659	6.47332	-62.9082
0.03	99.0116	90.5368	77.9099	60.2141	33.631	0.335197	-66.48
0.035	98.906	89.5735	75.8242	56.8627	29.0323	-4.7619	-69.2308
0.04	98.8072	88.6792	73.913	53.8462	25	-9.09091	-71.4286
0.045	98.7139	87.8425	72.146	51.102	21.4168	-12.8326	-73.234
0.05	98.6254	87.0545	70.5004	48.5844	18.1983	-16.1125	-74.7498
0.055	98.541	86.3085	68.9587	46.2584	15.2814	-19.0209	-76.0446
0.06	98.4601	85.5991	67.5072	44.0967	12.6181	-21.6248	-77.1667
0.065	98.3825	84.9221	66.1349	42.0776	10.1708	-23.9754	-78.1508
0.07	98.3076	84.274	64.8328	40.1835	7.90956	-26.1122	-79.0225
0.075	98.2354	83.6518	63.5933	38.3999	5.81028	-28.0666	-79.8016
0.08	98.1654	83.053	62.4102	36.7149	3.85307	-29.8638	-80.503
0.085	98.0975	82.4756	61.2782	35.1182	2.02146	-31.5243	-81.1387
0.09	98.0316	81.9176	60.1927	33.6012	0.301631	-33.0649	-81.7182
0.095	97.9674	81.3777	59.1497	32.1565	-1.31812	-34.4999	-82.2493
0.1	97.9049	80.8543	58.1457	30.7777	-2.84779	-35.8409	-82.7382
0.11	97.7844	79.8526	56.2433	28.1961	-5.67012	-38.2799	-83.6095
0.12	97.6692	78.9043	54.4652	25.8194	-8.22154	-40.4464	-84.3647
0.13	97.5586	78.003	52.7952	23.6183	-10.5452	-42.3885	-85.0273
0.14	97.4523	77.1433	51.2204	21.5698	-12.6749	-44.1432	-85.6145
0.15	97.3497	76.3209	49.7299	19.6547	-14.6376	-45.7393	-86.1395
0.16	97.2505	75.5321	48.3149	17.8575	-16.4553	-47.1997	-86.6125
0.17	97.1543	74.7737	46.9678	16.1653	-18.1458	-48.543	-87.0413
0.18	97.061	74.0431	45.6821	14.567	-19.7241	-49.7843	-87.4325
0.19	96.9703	73.3379	44.4524	13.0533	-21.2026	-50.936	-87.7911
0.2	96.882	72.6562	43.2739	11.6161	-22.592	-52.0087	-88.1215
0.21	96.7958	71.9962	42.1423	10.2486	-23.9012	-53.0111	-88.427
0.22	96.7118	71.3563	41.054	8.94469	-25.1382	-53.9507	-88.7107
0.23	96.6297	70.7351	40.0057	7.69909	-26.3094	-54.8339	-88.975
0.24	96.5493	70.1314	38.9947	6.50713	-27.421	-55.6662	-89.2219
0.25	96.4707	69.5441	38.0182	5.36469	-28.4779	-56.4524	-89.4534
0.26	96.3937	68.9722	37.074	4.26809	-29.4847	-57.1966	-89.6708
0.27	96.3182	68.4148	36.16	3.21406	-30.4455	-57.9026	-89.8757
0.28	96.2441	67.871	35.2743	2.19963	-31.3637	-58.5734	-90.0691
0.29	96.1713	67.3402	34.4153	1.22216	-32.2425	-59.212	-90.252
0.3	96.0998	66.8215	33.5813	0.279245	-33.0849	-59.821	-90.4254
0.31	96.0296	66.3145	32.771	-0.631291	-33.8933	-60.4025	-90.5901
0.32	95.9605	65.8184	31.983	-1.51143	-34.6701	-60.9586	-90.7467
0.33	95.8925	65.3329	31.2162	-2.36297	-35.4173	-61.4912	-90.8959
0.34	95.8256	64.8573	30.4695	-3.18758	-36.1369	-62.0018	-91.0382
0.35	95.7597	64.3913	29.7418	-3.98676	-36.8306	-62.4919	-91.1742
0.36	95.6947	63.9344	29.0323	-4.7619	-37.5	-62.963	-91.3043
0.37	95.6307	63.4862	28.3399	-5.51431	-38.1465	-63.4161	-91.429
0.38	95.5676	63.0464	27.6641	-6.24515	-38.7714	-63.8525	-91.5485
0.39	95.5053	62.6146	27.0039	-6.95553	-39.3759	-64.2732	-91.6633
0.4	95.4438	62.1905	26.3587	-7.64646	-39.9612	-64.6791	-91.7735
0.45	95.148	60.1752	23.3363	-10.8403	-42.6331	-66.5141	-92.267
0.5	94.8688	58.3138	20.6065	-13.6655	-44.9512	-68.0831	-92.6824
0.55	94.604	56.5824	18.119	-16.1923	-46.9894	-69.4454	-93.0382
0.6	94.3515	54.9626	15.8355	-18.4729	-48.8012	-70.643	-93.3474
0.65	94.1099	53.4397	13.7263	-20.5472	-50.4267	-71.7069	-93.6193
0.7	93.8779	52.0021	11.7676	-22.4462	-51.8966	-72.6605	-93.8607
0.75	93.6546	50.64	9.94019	-24.1948	-53.2348	-73.5217	-94.077
0.8	93.439	49.3454	8.22845	-25.8129	-54.4603	-74.3048	-94.2722
0.85	93.2305	48.1116	6.6193	-27.3168	-55.5884	-75.0208	-94.4496
0.9	93.0284	46.9327	5.10176	-28.72	-56.6318	-75.679	-94.6116
0.95	92.8323	45.8039	3.66653	-30.0339	-57.6006	-76.2868	-94.7604
1	92.6417	44.7209	2.30565	-31.268	-58.5037	-76.8503	-94.8976

## Sheet: Fig. 7a KHomo
																												k1	KHomo	ee1	[Cattot]
KHomo = 3.3				KHomo = 10				KHomo = 33				KHomo = 100				KHomo = 330				KHomo = 1000				KHomo = 10000				10	var	1	0.11
eeP	eeL	β	α	eeP	eeL	β	α	eeP	eeL	β	α	eeP	eeL	β	α	eeP	eeL	β	α	eeP	eeL	β	α	eeP	eeL	β	α	k2	KHetero	ee2
0	0	1.65431e-07	0.000813464	0	0	1.65424e-07	0.000813447	1.21478e-06	9.8565e-09	1.65401e-07	0.000813391	1.11698e-06	1.08758e-08	1.65334e-07	0.000813226	#NUM!	#NUM!	1.65105e-07	0.000812663	1.70582e-07	2.45275e-08	1.64441e-07	0.000811027	0	0	1.56014e-07	0.000789973	10	330000	-1
4.9432	0.0369461	1.65429e-07	0.000814464	4.90301	0.0373483	1.65423e-07	0.000814447	4.76668	0.038729	1.65399e-07	0.000814391	4.38351	0.0427517	1.65332e-07	0.000814226	3.20779	0.0565672	1.65102e-07	0.000813663	0.668075	0.0968686	1.64435e-07	0.000812027	-7.44511	0.647164	1.55962e-07	0.000790973	k2'
6.98424	0.052266	1.65428e-07	0.000815464	6.92734	0.0528357	1.65421e-07	0.000815447	6.73434	0.0547913	1.65398e-07	0.000815391	6.19195	0.0604889	1.6533e-07	0.000815226	4.52829	0.0800569	1.65099e-07	0.000814663	0.937897	0.137139	1.64428e-07	0.000813027	-10.4997	0.916605	1.55909e-07	0.000791973	0
8.54598	0.0640325	1.65426e-07	0.000816464	8.47621	0.0647313	1.65419e-07	0.000816447	8.23959	0.0671301	1.65396e-07	0.000816391	7.57466	0.0741189	1.65328e-07	0.000816226	5.53597	0.0981214	1.65096e-07	0.000815663	1.14026	0.16814	1.64422e-07	0.000814027	-12.824	1.12429	1.55856e-07	0.000792973
9.8589	0.0739615	1.65425e-07	0.000817464	9.77826	0.0747696	1.65418e-07	0.000817447	9.50474	0.0775437	1.65394e-07	0.000817391	8.73623	0.085626	1.65326e-07	0.000817226	6.38084	0.113384	1.65093e-07	0.000816663	1.30697	0.194359	1.64415e-07	0.000815027	-14.7671	1.30017	1.55803e-07	0.000793973
11.0124	0.0827172	1.65423e-07	0.000818464	10.9221	0.0836221	1.65416e-07	0.000818447	10.616	0.0867284	1.65393e-07	0.000818391	9.75597	0.0957785	1.65324e-07	0.000818226	7.12112	0.12686	1.65089e-07	0.000817663	1.45045	0.217532	1.64409e-07	0.000816027	-16.4649	1.45582	1.55751e-07	0.000794973
14.7203	0.111115	1.65417e-07	0.000822464	14.5986	0.112337	1.6541e-07	0.000822447	14.1862	0.11653	1.65386e-07	0.000822391	13.0281	0.128746	1.65316e-07	0.000822226	9.48537	0.170701	1.65077e-07	0.000821663	1.88865	0.293095	1.64383e-07	0.000820027	-21.8517	1.9649	1.55539e-07	0.000798973		#REF!	#REF!
17.6268	0.13371	1.65411e-07	0.000826464	17.48	0.135187	1.65404e-07	0.000826447	16.9822	0.140257	1.65379e-07	0.000826391	15.5852	0.155028	1.65308e-07	0.000826226	11.3184	0.205759	1.65064e-07	0.000825663	2.20203	0.353755	1.64357e-07	0.000824027	-25.9842	2.37561	1.55325e-07	0.000802973		#REF!	#REF!
20.0836	0.153093	1.65405e-07	0.000830464	19.915	0.154792	1.65398e-07	0.000830447	19.3434	0.160625	1.65373e-07	0.000830391	17.7402	0.177618	1.653e-07	0.000830226	12.8508	0.235983	1.65051e-07	0.000829663	2.44171	0.406251	1.6433e-07	0.000828027	-29.4048	2.73277	1.55111e-07	0.000806973		#REF!	#REF!
22.2409	0.170364	1.65399e-07	0.000834464	22.0527	0.172263	1.65391e-07	0.000834447	21.4149	0.178785	1.65366e-07	0.000834391	19.6267	0.197787	1.65292e-07	0.000834226	14.1814	0.263046	1.65039e-07	0.000833663	2.63017	0.453433	1.64304e-07	0.000832027	-32.3473	3.05528	1.54896e-07	0.000810973		#REF!	#REF!
24.1794	0.186112	1.65393e-07	0.000838464	23.9732	0.188197	1.65385e-07	0.000838447	23.2745	0.195355	1.65359e-07	0.000838391	21.3166	0.216212	1.65284e-07	0.000838226	15.3636	0.287844	1.65026e-07	0.000837663	2.77987	0.496823	1.64278e-07	0.000836027	-34.939	3.35324	1.5468e-07	0.000814973		#REF!	#REF!
28.3551	0.220888	1.65377e-07	0.000848464	28.1086	0.223392	1.65369e-07	0.000848447	27.2738	0.231989	1.65342e-07	0.000848391	24.9375	0.257035	1.65264e-07	0.000848226	17.8602	0.34306	1.64994e-07	0.000847663	3.03022	0.594037	1.64211e-07	0.000846027	-40.3391	4.02592	1.54135e-07	0.000824973		#REF!	#REF!
31.8697	0.251229	1.65362e-07	0.000858464	31.5874	0.254111	1.65354e-07	0.000858447	30.6319	0.264003	1.65325e-07	0.000858391	27.961	0.292823	1.65243e-07	0.000858226	19.9001	0.39181	1.64962e-07	0.000857663	3.15302	0.680616	1.64144e-07	0.000856027	-44.6768	4.63136	1.53583e-07	0.000834973		#REF!	#REF!
34.9284	0.278589	1.65347e-07	0.000868464	34.6134	0.281821	1.65338e-07	0.000868447	33.5473	0.292917	1.65309e-07	0.000868391	30.5712	0.325246	1.65223e-07	0.000868226	21.6217	0.436283	1.64929e-07	0.000867663	3.18426	0.76026	1.64076e-07	0.000866027	-48.2884	5.19387	1.53025e-07	0.000844973		#REF!	#REF!
37.6469	0.303774	1.65331e-07	0.000878464	37.3013	0.307339	1.65322e-07	0.000878447	36.1321	0.319576	1.65292e-07	0.000878391	32.872	0.35523	1.65202e-07	0.000878226	23.1038	0.47769	1.64896e-07	0.000877663	3.14546	0.83501	1.64008e-07	0.000876027	-51.3662	5.72679	1.5246e-07	0.000854973		#REF!	#REF!
40.0984	0.327287	1.65316e-07	0.000888464	39.7238	0.331171	1.65307e-07	0.000888447	38.4572	0.344504	1.65275e-07	0.000888391	34.9295	0.383352	1.65182e-07	0.000888226	24.397	0.516782	1.64864e-07	0.000887663	3.05101	0.906127	1.63939e-07	0.000886027	-54.0332	6.23835	1.51889e-07	0.000864973		#REF!	#REF!
42.3329	0.349465	1.65301e-07	0.000898464	41.9307	0.353658	1.65291e-07	0.000898447	40.571	0.368054	1.65258e-07	0.000898391	36.7887	0.409997	1.65161e-07	0.000898226	25.5359	0.554063	1.6483e-07	0.000897663	2.91115	0.974454	1.63869e-07	0.000896027	-56.3735	6.734	1.51312e-07	0.000874973		#REF!	#REF!
44.3864	0.370548	1.65285e-07	0.000908464	43.9575	0.375043	1.65275e-07	0.000908447	42.5084	0.390476	1.65241e-07	0.000908391	38.4823	0.435441	1.65141e-07	0.000908226	26.5456	0.589887	1.64797e-07	0.000907663	2.73359	1.04058	1.63799e-07	0.000906027	-58.4479	7.21758	1.50728e-07	0.000884973		#REF!	#REF!
46.2857	0.390714	1.6527e-07	0.000918464	45.831	0.395506	1.6526e-07	0.000918447	44.2956	0.411956	1.65224e-07	0.000918391	40.0347	0.459886	1.6512e-07	0.000918226	27.4454	0.624518	1.64764e-07	0.000917663	2.52433	1.10496	1.63728e-07	0.000916027	-60.3018	7.69188	1.50138e-07	0.000894973		#REF!	#REF!
48.0518	0.410098	1.65255e-07	0.000928464	47.5722	0.415182	1.65244e-07	0.000928447	45.953	0.432635	1.65207e-07	0.000928391	41.4651	0.483486	1.65099e-07	0.000928226	28.25	0.658154	1.6473e-07	0.000927663	2.28812	1.1679	1.63657e-07	0.000926027	-61.9704	8.15904	1.49541e-07	0.000904973		#REF!	#REF!
54.0736	0.48165	1.65193e-07	0.000968464	53.4998	0.487876	1.65181e-07	0.000968447	51.5659	0.50925	1.65139e-07	0.000968391	46.23	0.571526	1.65016e-07	0.000968226	30.7258	0.785446	1.64593e-07	0.000967663	1.14268	1.40982	1.63365e-07	0.000966027	-67.2671	9.98446	1.4709e-07	0.000944973		#REF!	#REF!
58.8748	0.546388	1.65132e-07	0.00100846	58.2135	0.55374	1.65118e-07	0.00100845	55.988	0.57898	1.6507e-07	0.00100839	49.8751	0.65252	1.64931e-07	0.00100823	32.3391	0.905143	1.64453e-07	0.00100766	-0.213678	1.64256	1.63064e-07	0.00100603	-71.0754	11.7822	1.44535e-07	0.000984973		#REF!	#REF!
62.8233	0.606502	1.6507e-07	0.00104846	62.0791	0.614983	1.65055e-07	0.00104845	59.5782	0.644102	1.65001e-07	0.00104839	52.7391	0.728944	1.64845e-07	0.00104823	33.3611	1.0204	1.6431e-07	0.00104766	-1.68846	1.87127	1.62752e-07	0.00104603	-73.9527	13.5843	1.41877e-07	0.00102497		#REF!	#REF!
66.1397	0.663253	1.65009e-07	0.00108846	65.3159	0.672879	1.64992e-07	0.00108845	62.5522	0.705926	1.64932e-07	0.00108839	55.0263	0.802215	1.64759e-07	0.00108823	33.9561	1.13301	1.64164e-07	0.00108766	-3.22643	2.09882	1.62431e-07	0.00108603	-76.2075	15.4083	1.39116e-07	0.00106497		#REF!	#REF!
68.9688	0.717442	1.64947e-07	0.00112846	68.0683	0.728234	1.64928e-07	0.00112845	65.0515	0.765283	1.64863e-07	0.00112839	56.871	0.873234	1.64671e-07	0.00112823	34.232	1.2441	1.64014e-07	0.00112766	-4.79265	2.32701	1.62101e-07	0.00112603	-78.0253	17.2651	1.36251e-07	0.00110497		#REF!	#REF!
73.5414	0.820158	1.64824e-07	0.00120846	72.4939	0.833361	1.64801e-07	0.00120845	68.9944	0.878687	1.64723e-07	0.00120839	59.582	1.01076	1.64493e-07	0.00120823	34.1064	1.46452	1.63706e-07	0.00120766	-7.92631	2.78972	1.6141e-07	0.00120603	-80.786	21.1034	1.30213e-07	0.00118497		#REF!	#REF!
77.0707	0.917433	1.64701e-07	0.00128846	75.8827	0.93317	1.64674e-07	0.00128845	71.9249	0.987196	1.64581e-07	0.00128839	61.3636	1.14462	1.64312e-07	0.00128823	33.3744	1.6855	1.63384e-07	0.00128766	-10.9839	3.26537	1.6068e-07	0.00128603	-82.7965	25.1338	1.23761e-07	0.00126497		#REF!	#REF!
79.8666	1.01086	1.64578e-07	0.00136846	78.5432	1.02926	1.64546e-07	0.00136845	74.1464	1.09245	1.64439e-07	0.00136839	62.5025	1.27656	1.64126e-07	0.00136823	32.2591	1.90917	1.6305e-07	0.00136766	-13.9187	3.75724	1.59911e-07	0.00136603	-84.3383	29.3749	1.16897e-07	0.00134497		#REF!	#REF!
82.126	1.10143	1.64454e-07	0.00144846	80.6712	1.12264	1.64418e-07	0.00144845	75.8509	1.19547	1.64295e-07	0.00144839	63.1802	1.40767	1.63936e-07	0.00144823	30.8974	2.13686	1.62703e-07	0.00144766	-16.7122	4.26732	1.59104e-07	0.00144603	-85.5671	33.8378	1.09619e-07	0.00142497		#REF!	#REF!
83.9808	1.18981	1.64331e-07	0.00152846	82.3981	1.21397	1.6429e-07	0.00152845	77.1675	1.29694	1.6415e-07	0.00152839	63.5174	1.53869	1.63743e-07	0.00152823	29.3775	2.36945	1.62343e-07	0.00152766	-19.3596	4.7969	1.58257e-07	0.00152603	-86.576	38.5294	1.01929e-07	0.00150497		#REF!	#REF!
85.8685	1.2979	1.64176e-07	0.00162846	84.1298	1.32597	1.64129e-07	0.00162845	78.4018	1.42232	1.63967e-07	0.00162839	63.5857	1.7031	1.63495e-07	0.00162823	27.3431	2.66796	1.61875e-07	0.00162766	-22.4672	5.48764	1.57143e-07	0.00162603	-87.6156	44.7224	9.17359e-08	0.00160497		#REF!	#REF!
87.3924	1.40395	1.64021e-07	0.00172846	85.5013	1.43615	1.63967e-07	0.00172845	79.2909	1.5467	1.63782e-07	0.00172839	63.365	1.86883	1.63242e-07	0.00172823	25.2279	2.97587	1.61387e-07	0.00172766	-25.3623	6.21141	1.55969e-07	0.00172603	-88.476	51.286	8.08974e-08	0.00170497		#REF!	#REF!
88.6396	1.5084	1.63866e-07	0.00182846	86.5991	1.54497	1.63805e-07	0.00182845	79.9191	1.67052	1.63595e-07	0.00182839	62.9329	2.03639	1.62983e-07	0.00182823	23.0804	3.29375	1.60879e-07	0.00182766	-28.0601	6.96903	1.54734e-07	0.00182603	-89.204	58.2241	6.94137e-08	0.00180497		#REF!	#REF!
89.6719	1.61159	1.63711e-07	0.00192846	87.4847	1.65277	1.63642e-07	0.00192845	80.3462	1.79414	1.63406e-07	0.00192839	62.3439	2.20612	1.62717e-07	0.00192823	20.9319	3.62202	1.60351e-07	0.00192766	-30.5765	7.76107	1.53437e-07	0.00192603	-89.8309	65.5396	5.72848e-08	0.00190497		#REF!	#REF!
90.5345	1.71376	1.63555e-07	0.00202846	88.2029	1.75978	1.63478e-07	0.00202845	80.6159	1.91781	1.63215e-07	0.00202839	61.6373	2.3783	1.62445e-07	0.00202823	18.8029	3.96098	1.59803e-07	0.00202766	-32.9272	8.58796	1.5208e-07	0.00202603	-90.3782	73.2344	4.45108e-08	0.00200497		#REF!	#REF!
92.854	2.11551	1.62931e-07	0.00242846	89.9623	2.18334	1.62818e-07	0.00242845	80.6631	2.41623	1.6243e-07	0.00242839	58.1154	3.0949	1.61299e-07	0.00242823	14.6527	4.67184	1.58646e-07	0.00222766	-37.1876	10.3475	1.49182e-07	0.00222603	-90.8617	81.3099	3.10916e-08	0.00210497		#REF!	#REF!
94.1191	2.5108	1.62304e-07	0.00282846	90.6882	2.60432	1.62149e-07	0.00282845	79.7803	2.92537	1.61614e-07	0.00282839	54.0995	3.861	1.60055e-07	0.00282823	10.689	5.42765	1.5741e-07	0.00242766	-40.9425	12.2493	1.46041e-07	0.00242603	-91.2929	89.7674	1.70273e-08	0.00220497		#REF!	#REF!
94.8372	2.90303	1.61674e-07	0.00322846	90.8821	3.0261	1.61469e-07	0.00322845	78.4465	3.44867	1.60765e-07	0.00322839	49.9796	4.68014	1.58714e-07	0.00322823	6.93253	6.22924	1.56093e-07	0.00262766	-44.2745	14.2947	1.42655e-07	0.00262603	-91.6805	98.6075	2.31777e-09	0.00230497		#REF!	#REF!
95.2427	3.29393	1.61041e-07	0.00362846	90.775	3.45047	1.6078e-07	0.00362845	76.8799	3.98791	1.59885e-07	0.00362839	45.9155	5.55418	1.57276e-07	0.00362823	3.38592	7.07716	1.54696e-07	0.00282766	-47.2499	16.4842	1.39026e-07	0.00282603	-92.0314	107.831	-1.30369e-08	0.00240497		#REF!	#REF!
95.4565	3.68454	1.60404e-07	0.00402846	90.4859	3.87843	1.60081e-07	0.00402845	75.1908	4.54411	1.58972e-07	0.00402839	41.9759	6.48415	1.55741e-07	0.00402823	0.0428183	7.97182	1.53219e-07	0.00302766	-49.9228	18.8184	1.35153e-07	0.00302603	-92.351	117.438	-2.90367e-08	0.00250497		#REF!	#REF!
95.5463	4.07547	1.59764e-07	0.00442846	90.081	4.31061	1.59372e-07	0.00442845	73.4396	5.11792	1.58028e-07	0.00442839	38.1896	7.4707	1.54108e-07	0.00442823	-3.10719	8.91348	1.51662e-07	0.00322766	-52.3367	21.2976	1.31036e-07	0.00322603	-92.6435	127.43	-4.56817e-08	0.00260497		#REF!	#REF!
95.4999	4.85982	1.58475e-07	0.00522846	89.0671	5.18915	1.57926e-07	0.00522845	69.8774	6.31984	1.56042e-07	0.00522839	31.1056	9.61512	1.50553e-07	0.00522823	-6.07618	9.90237	1.50024e-07	0.00342766	-54.5276	23.9221	1.26675e-07	0.00342603	-92.9126	137.806	-6.29719e-08	0.00270497		#REF!	#REF!
95.2801	5.64897	1.57172e-07	0.00602846	87.9053	6.08807	1.56441e-07	0.00602845	66.3393	7.59567	1.53929e-07	0.00602839	24.6539	11.9895	1.4661e-07	0.00602823	-8.87656	10.9386	1.48307e-07	0.00362766	-56.525	26.6921	1.2207e-07	0.00362603	-93.161	148.567	-8.09072e-08	0.00280497		#REF!	#REF!
94.9653	6.44395	1.55857e-07	0.00682846	86.6714	7.00842	1.54917e-07	0.00682845	62.883	8.94646	1.51688e-07	0.00682839	18.7791	14.5948	1.42278e-07	0.00682823	-11.5205	12.0224	1.46509e-07	0.00382766	-58.3535	29.6077	1.17221e-07	0.00382603	-93.3912	159.712	-9.94876e-08	0.00290497		#REF!	#REF!
94.5948	7.24534	1.5453e-07	0.00762846	85.4028	7.95077	1.53354e-07	0.00762845	59.5319	10.3728	1.49319e-07	0.00762839	13.4181	17.4317	1.37559e-07	0.00762823	-14.0194	13.1537	1.44631e-07	0.00402766	-60.0336	32.6691	1.12128e-07	0.00402603	-93.6052	171.244	-1.18713e-07	0.00300497		#REF!	#REF!
94.1899	8.05351	1.53189e-07	0.00842846	84.1198	8.9155	1.51753e-07	0.00842845	56.2945	11.875	1.46822e-07	0.00842839	8.51181	20.5006	1.32451e-07	0.00842823	-16.384	14.3328	1.42673e-07	0.00422766	-61.5829	35.8764	1.06792e-07	0.00422603	-93.8049	183.16	-1.38584e-07	0.00310497		#REF!	#REF!
93.763	8.86871	1.51836e-07	0.00922846	82.8337	9.90284	1.50113e-07	0.00922845	53.1723	13.4534	1.44197e-07	0.00922839	4.0075	23.8017	1.26955e-07	0.00922823	-18.6243	15.5595	1.40635e-07	0.00442766	-63.0159	39.2296	1.01211e-07	0.00442603	-94.1665	208.15	-1.80261e-07	0.00330497		#REF!	#REF!
93.3217	9.69108	1.50469e-07	0.0100285	81.5514	10.913	1.48433e-07	0.0100284	50.1636	15.1082	1.41444e-07	0.0100284	-0.140763	27.3351	1.21071e-07	0.0100282	-20.7494	16.834	1.38517e-07	0.00462766	-64.3455	42.7287	9.53868e-08	0.00462603	-94.4858	234.682	-2.24519e-07	0.00350497		#REF!	#REF!
92.8709	10.5207	1.4909e-07	0.0108285	80.2771	11.9459	1.46716e-07	0.0108284	47.2647	16.8393	1.38562e-07	0.0108284	-3.97271	31.101	1.14799e-07	0.0108282	-22.7676	18.1564	1.36318e-07	0.00482766	-65.5823	46.3739	8.93184e-08	0.00482603	-94.7699	262.757	-2.71357e-07	0.00370497		#REF!	#REF!
91.721	12.6273	1.45587e-07	0.0128285	77.1417	14.629	1.42251e-07	0.0128284	40.4696	21.502	1.30799e-07	0.0128284	-7.52267	35.0995	1.08139e-07	0.0116282	-24.6865	19.5266	1.3404e-07	0.00502766	-66.7359	50.1651	8.30062e-08	0.00502603	-95.0245	292.376	-3.20776e-07	0.00390497		#REF!	#REF!
90.558	14.7806	1.42003e-07	0.0148285	74.092	17.4564	1.37545e-07	0.0148284	34.2623	26.6436	1.22236e-07	0.0148284	-10.8203	39.3306	1.01091e-07	0.0124282	-28.2537	22.4107	1.29242e-07	0.00542766	-67.8144	54.1025	7.64501e-08	0.00522603	-95.2542	323.54	-3.72776e-07	0.00410497		#REF!	#REF!
89.3947	16.9812	1.3834e-07	0.0168285	71.1341	20.4285	1.32595e-07	0.0168284	28.5748	32.2645	1.12872e-07	0.0168284	-13.8914	43.7943	9.36546e-08	0.0132282	-31.5	25.4865	1.24123e-07	0.00582766	-68.8249	58.186	6.96501e-08	0.00542603	-95.4624	356.247	-4.27356e-07	0.00430497		#REF!	#REF!
88.237	19.2292	1.34596e-07	0.0188285	68.2685	23.5455	1.27404e-07	0.0188284	23.3466	38.365	1.02709e-07	0.0188284	-16.7585	48.4908	8.58301e-08	0.0140282	-34.4662	28.7542	1.18684e-07	0.00622766	-69.7736	62.4156	6.26061e-08	0.00562603	-95.6521	390.5	-4.84517e-07	0.00450497		#REF!	#REF!
87.0881	21.5249	1.30773e-07	0.0208285	65.4934	26.8076	1.2197e-07	0.0208284	18.5253	44.9452	9.17447e-08	0.0208284	-19.441	53.42	7.76175e-08	0.0148282	-37.1868	32.2138	1.12925e-07	0.00662766	-70.6661	66.7914	5.53183e-08	0.00582603	-95.8258	426.297	-5.44259e-07	0.00470497		#REF!	#REF!
85.9498	23.8684	1.26869e-07	0.0228285	62.8059	30.2149	1.16293e-07	0.0228284	14.0657	52.0052	7.99806e-08	0.0228284	-21.9562	58.5819	6.90168e-08	0.0156282	-39.6909	35.8654	1.06844e-07	0.00702766	-71.5073	71.3134	4.77865e-08	0.00602603	-95.9854	463.638	-6.06581e-07	0.00490497		#REF!	#REF!
84.8229	26.2596	1.22886e-07	0.0248285	60.2026	33.7674	1.10374e-07	0.0248284	9.92897	59.5452	6.74165e-08	0.0248284	-24.3192	63.9766	6.0028e-08	0.0164282	-42.0032	39.7091	1.00443e-07	0.00742766	-72.3014	75.9816	4.00109e-08	0.00622603	-96.1325	502.525	-6.71484e-07	0.00510497		#REF!	#REF!
83.708	28.6986	1.18822e-07	0.0268285	57.6802	37.4653	1.04213e-07	0.0268284	6.08135	67.565	5.40521e-08	0.0268284	-26.5435	69.604	5.0651e-08	0.0172282	-44.1448	43.745	9.37217e-08	0.00782766	-73.0523	80.796	3.19913e-08	0.00642603	-96.2686	542.957	-7.38967e-07	0.00530497		#REF!	#REF!
82.6052	31.1856	1.14679e-07	0.0288285	55.2351	41.3085	9.78089e-08	0.0288284	2.49371	76.0649	3.98877e-08	0.0288284	-28.6408	75.4643	4.0886e-08	0.0180282	-46.134	47.973	8.66794e-08	0.00822766	-73.7635	85.7567	2.37279e-08	0.00662603	-96.395	584.933	-8.09031e-07	0.00550497		#REF!	#REF!
81.5148	33.7204	1.10455e-07	0.0308285	52.8642	45.297	9.11626e-08	0.0308284	-0.859373	85.0447	2.4923e-08	0.0308284	-30.6217	81.5574	3.07328e-08	0.0188282	-47.9864	52.3933	7.93165e-08	0.00862766	-74.438	90.8636	1.52206e-08	0.00682603	-96.5125	628.455	-8.81676e-07	0.00570497		#REF!	#REF!
80.4367	36.3032	1.06152e-07	0.0328285	50.5642	49.431	8.42739e-08	0.0328284	-4.00013	94.5046	9.15819e-09	0.0328284	-32.4957	87.8832	2.01915e-08	0.0196282	-49.7157	57.0057	7.1633e-08	0.00902766	-75.0786	96.1167	6.4693e-09	0.00702603	-96.6222	673.522	-9.56902e-07	0.00590497		#REF!	#REF!
79.3709	38.9338	1.01768e-07	0.0348285	48.3321	53.7103	7.71428e-08	0.0348284	-6.94808	104.444	-7.40678e-09	0.0348284	-34.2711	94.4419	9.26211e-09	0.0204282	-51.3336	61.8104	6.36288e-08	0.00942766	-75.6878	101.516	-2.52586e-09	0.00722603	-96.7248	720.134	-1.03471e-06	0.00610497		#REF!	#REF!
78.3172	41.6125	9.73046e-08	0.0368285	46.165	58.1351	6.97692e-08	0.0368284	-9.72044	114.864	-2.47719e-08	0.0368284	-35.9555	101.233	-2.05541e-09	0.0212282	-52.8507	66.8074	5.53039e-08	0.00982766	-76.2679	107.062	-1.17649e-08	0.00742603	-96.8209	768.292	-1.11509e-06	0.00630497		#REF!	#REF!
77.2755	44.339	9.2761e-08	0.0388285	44.0601	62.7052	6.21531e-08	0.0388284	-12.3324	125.764	-4.29372e-08	0.0388284	-37.5557	108.258	-1.3761e-08	0.0220282	-54.276	71.9966	4.66584e-08	0.0102277	-76.8208	112.754	-2.12479e-08	0.00762603	-96.9113	817.995	-1.19806e-06	0.00650497		#REF!	#REF!
76.2457	47.1136	8.81375e-08	0.0408285	42.0148	67.4208	5.42947e-08	0.0408284	-14.7975	137.144	-6.19027e-08	0.0408284	-39.078	115.515	-2.58548e-08	0.0228282	-55.6176	77.3781	3.76923e-08	0.0106277	-77.3486	118.592	-3.09747e-08	0.00782603	-96.9962	869.243	-1.28361e-06	0.00670497		#REF!	#REF!
75.2276	49.9361	8.3434e-08	0.0428285	40.0267	72.2818	4.61938e-08	0.0428284	-17.1278	149.004	-8.16683e-08	0.0428284	-40.5278	123.005	-3.83366e-08	0.0236282	-56.8827	82.952	2.84056e-08	0.0110277	-77.8527	124.576	-4.09455e-08	0.00802603	-97.0764	922.037	-1.37174e-06	0.00690497		#REF!	#REF!
74.221	52.8066	7.86504e-08	0.0448285	38.0934	77.2882	3.78504e-08	0.0448284	-19.3341	161.345	-1.02234e-07	0.0448284	-41.9102	130.728	-5.12066e-08	0.0244282	-58.0777	88.7181	1.87981e-08	0.0114277	-78.3349	130.707	-5.11602e-08	0.00822603	-97.1521	976.375	-1.46245e-06	0.00710497		#REF!	#REF!
73.2258	55.725	7.37869e-08	0.0468285	36.2127	82.4401	2.92646e-08	0.0468284	-21.4259	174.165	-1.236e-07	0.0468284	-43.2298	138.683	-6.44647e-08	0.0252282	-59.2082	94.6766	8.8701e-09	0.0118277	-78.7965	136.984	-6.16187e-08	0.00842603	-97.2237	1032.26	-1.55574e-06	0.00730497		#REF!	#REF!
72.2418	58.6914	6.88433e-08	0.0488285	34.3825	87.7374	2.04364e-08	0.0488284	-23.412	187.465	-1.45766e-07	0.0488284	-44.4908	146.872	-7.81109e-08	0.0260282	-60.2793	100.827	-1.37859e-09	0.0122277	-79.2388	143.408	-7.23212e-08	0.00862603	-97.2915	1089.69	-1.65161e-06	0.00750497		#REF!	#REF!
71.2689	61.7058	6.38198e-08	0.0508285	32.6008	93.1802	1.13657e-08	0.0508284	-25.3001	201.245	-1.68732e-07	0.0508284	-45.697	155.293	-9.21452e-08	0.0268282	-61.2956	107.17	-1.19479e-08	0.0126277	-79.663	149.977	-8.32676e-08	0.00882603	-97.3558	1148.66	-1.75006e-06	0.00770497		#REF!	#REF!
70.3068	64.7682	5.87162e-08	0.0528285	30.8657	98.7683	2.05263e-09	0.0528284	-27.0974	215.506	-1.92499e-07	0.0528284	-46.8519	163.948	-1.06568e-07	0.0276282	-62.2611	113.706	-2.28379e-08	0.0130277	-80.0702	156.693	-9.44579e-08	0.00902603	-97.417	1209.19	-1.85109e-06	0.00790497		#REF!	#REF!
69.3554	67.8786	5.35327e-08	0.0548285	29.1753	104.502	-7.50291e-09	0.0548284	-28.8103	230.246	-2.17065e-07	0.0548284	-47.9587	172.835	-1.21378e-07	0.0284282	-63.1796	120.434	-3.40485e-08	0.0134277	-80.4613	163.556	-1.05892e-07	0.00922603	-97.4752	1271.25	-1.9547e-06	0.00810497		#REF!	#REF!
68.4145	71.037	4.82692e-08	0.0568285	27.5281	110.381	-1.73009e-08	0.0568284	-30.4445	245.467	-2.42432e-07	0.0568284	-49.0203	181.955	-1.36577e-07	0.0292282	-64.0545	127.354	-4.55798e-08	0.0138277	-80.8374	170.564	-1.1757e-07	0.00942603	-97.5306	1334.86	-2.0609e-06	0.00830497		#REF!	#REF!
67.484	74.2433	4.29256e-08	0.0588285	25.9223	116.406	-2.73413e-08	0.0588284	-32.0054	261.168	-2.68599e-07	0.0588284	-50.0395	191.307	-1.52164e-07	0.0300282	-65.6851	141.771	-6.96042e-08	0.0146277	-81.1993	177.719	-1.29492e-07	0.00962603	-97.5834	1400.02	-2.16967e-06	0.00850497		#REF!	#REF!
66.5637	77.4976	3.75021e-08	0.0608285	24.3564	122.576	-3.76242e-08	0.0608284	-33.4978	277.348	-2.95566e-07	0.0608284	-51.0187	200.893	-1.68138e-07	0.0308282	-67.1741	156.958	-9.49112e-08	0.0154277	-81.5477	185.02	-1.41658e-07	0.00982603	-97.6338	1466.72	-2.28103e-06	0.00870497		#REF!	#REF!
65.6534	80.8	3.19985e-08	0.0628285	22.829	128.891	-4.81495e-08	0.0628284	-34.926	294.009	-3.23333e-07	0.0628284	-51.9603	210.711	-1.84501e-07	0.0316282	-68.5393	172.914	-1.21501e-07	0.0162277	-81.8834	192.468	-1.54068e-07	0.010026	-97.682	1534.97	-2.39496e-06	0.00890497		#REF!	#REF!
64.7529	84.1503	2.6415e-08	0.0648285	21.3386	135.352	-5.89172e-08	0.0648284	-36.2942	311.15	-3.51901e-07	0.0648284	-52.8663	220.763	-2.01253e-07	0.0324282	-69.7954	189.64	-1.49373e-07	0.0170277	-82.2071	200.062	-1.66721e-07	0.010226	-97.7281	1604.76	-2.51148e-06	0.00910497		#REF!	#REF!
63.8622	87.5486	2.07514e-08	0.0668285	19.884	141.958	-6.99274e-08	0.0668284	-37.6061	328.771	-3.81268e-07	0.0668284	-53.7388	231.047	-2.18392e-07	0.0332282	-70.955	207.135	-1.78528e-07	0.0178277	-82.5194	207.802	-1.79619e-07	0.010426	-97.7723	1676.1	-2.63057e-06	0.00930497		#REF!	#REF!
62.9811	90.9949	1.50078e-08	0.0688285	18.4638	148.71	-8.118e-08	0.0688284	-38.865	346.872	-4.11436e-07	0.0688284	-54.5796	241.564	-2.35919e-07	0.0340282	-72.0288	225.399	-2.08965e-07	0.0186277	-82.821	215.688	-1.92761e-07	0.010626	-97.8146	1748.99	-2.75225e-06	0.00950497		#REF!	#REF!
62.1093	94.4892	9.18428e-09	0.0708285	17.0769	155.607	-9.26751e-08	0.0708284	-40.0741	365.454	-4.42404e-07	0.0708284	-55.3904	252.314	-2.53835e-07	0.0348282	-73.026	244.433	-2.40685e-07	0.0194277	-83.1123	223.721	-2.06146e-07	0.010826	-97.8552	1823.42	-2.87651e-06	0.00970497		#REF!	#REF!
61.2468	98.0315	3.28072e-09	0.0728285	15.722	162.65	-1.04413e-07	0.0728284	-41.2363	384.515	-4.74172e-07	0.0728284	-56.1728	263.297	-2.72138e-07	0.0356282	-73.9546	264.237	-2.73687e-07	0.0202277	-83.3938	231.9	-2.19775e-07	0.011026	-97.8942	1899.39	-3.00335e-06	0.00990497		#REF!	#REF!
60.3935	101.622	-2.70284e-09	0.0748285	14.3982	169.838	-1.16392e-07	0.0748284	-42.3543	404.056	-5.0674e-07	0.0748284	-56.9281	274.512	-2.9083e-07	0.0364282	-74.8214	284.81	-3.07972e-07	0.0210277	-83.6662	240.225	-2.33648e-07	0.011226	-97.9317	1976.91	-3.13277e-06	0.010105		#REF!	#REF!
59.5491	105.26	-8.7664e-09	0.0768285	13.1043	177.172	-1.28615e-07	0.0768284	-43.4306	424.078	-5.40108e-07	0.0768284	-57.6579	285.961	-3.0991e-07	0.0372282	-75.6323	306.152	-3.43539e-07	0.0218277	-83.9297	248.697	-2.47766e-07	0.011426	-97.9677	2055.98	-3.26477e-06	0.010305		#REF!	#REF!
58.7135	108.946	-1.491e-08	0.0788285	11.8393	184.651	-1.4108e-07	0.0788284	-44.4673	444.579	-5.74277e-07	0.0788284	-59.3785	315.601	-3.59307e-07	0.0392282	-77.448	362.875	-4.38069e-07	0.0238277	-84.1848	257.315	-2.62127e-07	0.011626	-98.0024	2136.59	-3.39935e-06	0.010505		#REF!	#REF!
57.8866	112.681	-2.11335e-08	0.0808285	10.6023	192.276	-1.53787e-07	0.0808284	-45.4668	465.561	-6.09245e-07	0.0808284	-60.9648	346.696	-4.1113e-07	0.0412282	-79.0118	424.407	-5.40616e-07	0.0258277	-84.432	266.079	-2.76731e-07	0.011826	-98.0358	2218.75	-3.53651e-06	0.010705		#REF!	#REF!
57.0683	116.463	-2.74371e-08	0.0828285	9.39242	200.046	-1.66737e-07	0.0828284	-46.431	487.023	-6.45014e-07	0.0828284	-62.4318	379.247	-4.65379e-07	0.0432282	-80.3728	490.748	-6.51178e-07	0.0278277	-84.6715	274.99	-2.9158e-07	0.012026	-98.0679	2302.45	-3.67625e-06	0.010905		#REF!	#REF!
56.2585	120.293	-3.38207e-08	0.0848285	8.20867	207.961	-1.79929e-07	0.0848284	-47.3616	508.964	-6.81583e-07	0.0848284	-63.7925	413.253	-5.22054e-07	0.0452282	-81.568	561.9	-7.69756e-07	0.0298277	-84.9038	284.047	-3.06673e-07	0.012226	-98.099	2387.7	-3.81857e-06	0.011105		#REF!	#REF!
55.4569	124.171	-4.02842e-08	0.0868285	7.05027	216.022	-1.93363e-07	0.0868284	-48.2604	531.386	-7.18952e-07	0.0868284	-65.0581	448.715	-5.81154e-07	0.0472282	-82.626	637.86	-8.9635e-07	0.0318277	-85.1292	293.25	-3.2201e-07	0.012426	-98.1289	2474.49	-3.96347e-06	0.011305		#REF!	#REF!
54.6635	128.098	-4.68278e-08	0.0888285	5.91641	224.228	-2.0704e-07	0.0888284	-49.1291	554.288	-7.57122e-07	0.0888284	-66.2382	485.632	-6.4268e-07	0.0492282	-83.5691	718.63	-1.03096e-06	0.0338277	-87.0603	393.332	-4.8879e-07	0.014426	-98.3795	3427.43	-5.55444e-06	0.013305		#REF!	#REF!
53.8782	132.072	-5.34514e-08	0.0908285	4.80631	232.58	-2.2096e-07	0.0908284	-49.9691	577.671	-7.96091e-07	0.0908284	-67.3412	524.004	-7.06632e-07	0.0512282	-84.4151	804.21	-1.17359e-06	0.0358277	-88.5473	508.046	-6.79962e-07	0.016426	-98.5652	4534.92	-7.40347e-06	0.015305		#REF!	#REF!
53.1008	136.094	-6.0155e-08	0.0928285	3.71924	241.078	-2.35122e-07	0.0928284	-50.7818	601.533	-8.35861e-07	0.0928284	-68.3744	563.832	-7.73009e-07	0.0532282	-85.1782	894.599	-1.32423e-06	0.0378277	-89.7275	637.393	-8.95523e-07	0.018426	-98.7083	5796.97	-9.51056e-06	0.017305		#REF!	#REF!
52.3312	140.164	-6.69385e-08	0.0948285	2.65449	249.72	-2.49526e-07	0.0948284	-51.5685	625.875	-8.7643e-07	0.0948284	-69.3443	605.115	-8.41813e-07	0.0552282	-85.87	989.798	-1.48289e-06	0.0398277	-90.6871	781.374	-1.13547e-06	0.020426	-98.8221	7213.57	-1.18757e-05	0.019305		#REF!	#REF!
51.5693	144.283	-7.38021e-08	0.0968285	1.61137	258.509	-2.64173e-07	0.0968284	-52.3305	650.697	-9.178e-07	0.0968284	-70.2564	647.854	-9.13042e-07	0.0572282	-86.5002	1089.81	-1.64956e-06	0.0418277	-91.4827	939.989	-1.39982e-06	0.022426	-98.9146	8784.72	-1.44989e-05	0.021305		#REF!	#REF!
50.815	148.449	-8.07457e-08	0.0988285	0.589245	267.442	-2.79062e-07	0.0988284	-53.0688	676	-9.5997e-07	0.0988284	-71.1158	692.048	-9.86696e-07	0.0592282	-87.0765	1194.62	-1.82425e-06	0.0438277	-92.153	1113.24	-1.68855e-06	0.024426	-98.9914	10510.4	-1.73802e-05	0.023305		#REF!	#REF!
50.0681	152.663	-8.77693e-08	0.100828	-0.412527	276.521	-2.94194e-07	0.100828	-53.7846	701.782	-1.00294e-06	0.100828	-71.927	737.697	-1.06278e-06	0.0612282	-87.6057	1304.25	-2.00696e-06	0.0458277	-92.7254	1301.12	-2.00167e-06	0.026426	-99.0561	12390.7	-2.05196e-05	0.025305		#REF!	#REF!
49.3286	156.925	-9.48729e-08	0.102828	-1.39454	285.746	-3.09568e-07	0.102828	-54.479	728.045	-1.04671e-06	0.102828	-72.6938	784.802	-1.14128e-06	0.0632282	-88.0932	1418.69	-2.19768e-06	0.0478277	-93.22	1503.63	-2.33918e-06	0.028426	-99.1114	14425.5	-2.3917e-05	0.027305		#REF!	#REF!
48.5964	161.236	-1.02056e-07	0.104828	-2.35738	295.116	-3.25184e-07	0.104828	-55.1527	754.788	-1.09128e-06	0.104828	-73.4198	833.362	-1.22221e-06	0.0652282	-88.5438	1537.94	-2.39642e-06	0.0498277	-93.6516	1720.78	-2.70109e-06	0.030426	-99.1592	16614.9	-2.75725e-05	0.029305		#REF!	#REF!
47.8713	165.594	-1.0932e-07	0.106828	-3.3016	304.632	-3.41043e-07	0.106828	-55.8069	782.011	-1.13665e-06	0.106828	-74.1083	883.378	-1.30557e-06	0.0672282	-88.9615	1661.99	-2.60317e-06	0.0518277	-94.0315	1952.57	-3.08738e-06	0.032426	-99.201	18958.8	-3.1486e-05	0.031305		#REF!	#REF!
47.1532	170	-1.16664e-07	0.108828	-4.22773	314.293	-3.57144e-07	0.108828	-56.4422	809.714	-1.18282e-06	0.108828	-74.7619	934.849	-1.39135e-06	0.0692282	-89.3499	1790.86	-2.81794e-06	0.0538277	-94.3684	2198.98	-3.49806e-06	0.034426	-99.2377	21457.3	-3.56576e-05	0.033305		#REF!	#REF!
46.4421	174.454	-1.24087e-07	0.110828	-5.13629	324.099	-3.73488e-07	0.110828	-57.0595	837.897	-1.22979e-06	0.110828	-75.3834	987.776	-1.47956e-06	0.0712282	-89.7118	1924.53	-3.04073e-06	0.0558277	-94.6694	2460.03	-3.93314e-06	0.036426	-99.2703	24110.3	-4.00873e-05	0.035305		#REF!	#REF!
45.7378	178.957	-1.31591e-07	0.112828	-6.02777	334.051	-3.90075e-07	0.112828	-57.6595	866.56	-1.27757e-06	0.112828	-75.975	1042.16	-1.5702e-06	0.0732282	-90.05	2063.02	-3.27153e-06	0.0578277	-94.9398	2735.72	-4.3926e-06	0.038426	-99.2994	26917.9	-4.4775e-05	0.037305		#REF!	#REF!
45.0403	183.507	-1.39174e-07	0.114828	-6.90266	344.148	-4.06903e-07	0.114828	-58.243	895.703	-1.32614e-06	0.114828	-76.5389	1098	-1.66326e-06	0.0752282	-90.3666	2206.31	-3.51035e-06	0.0598277	-95.1841	3026.04	-4.87645e-06	0.040426	-99.3256	29880	-4.97208e-05	0.039305		#REF!	#REF!
44.3494	188.105	-1.46838e-07	0.116828	-7.7614	354.391	-4.23974e-07	0.116828	-58.8107	925.326	-1.37551e-06	0.116828	-77.0768	1155.29	-1.75874e-06	0.0772282	-90.6637	2354.42	-3.75719e-06	0.0618277	-95.4058	3330.99	-5.3847e-06	0.042426	-99.3492	32996.7	-5.49247e-05	0.041305		#REF!	#REF!
43.665	192.751	-1.54582e-07	0.118828	-8.60445	364.78	-4.41288e-07	0.118828	-59.3631	955.43	-1.42568e-06	0.118828	-77.5907	1214.04	-1.85666e-06	0.0792282	-90.943	2507.33	-4.01204e-06	0.0638277	-95.6081	3650.58	-5.91733e-06	0.044426	-99.3707	36268	-6.03866e-05	0.043305		#REF!	#REF!
42.9871	197.446	-1.62405e-07	0.120828	-9.43223	375.313	-4.58844e-07	0.120828	-59.9009	986.013	-1.47665e-06	0.120828	-78.082	1274.24	-1.95699e-06	0.0812282	-91.2061	2665.05	-4.2749e-06	0.0658277	-95.7933	3984.8	-6.47436e-06	0.046426	-99.3903	39693.8	-6.61066e-05	0.045305		#REF!	#REF!
42.3156	202.188	-1.70309e-07	0.122828	-10.2451	385.993	-4.76643e-07	0.122828	-60.4246	1017.08	-1.52842e-06	0.122828	-78.5523	1335.9	-2.05976e-06	0.0832282	-91.4544	2827.59	-4.54579e-06	0.0678277	-95.9634	4333.65	-7.05577e-06	0.048426	-99.4082	43274.1	-7.20847e-05	0.047305		#REF!	#REF!
41.9822	204.577	-1.74291e-07	0.123828	-10.6462	391.387	-4.85633e-07	0.123828	-60.6814	1032.79	-1.55461e-06	0.123828	-78.7799	1367.27	-2.11205e-06	0.0842282	-91.5733	2910.66	-4.68423e-06	0.0688277	-96.0435	4513.57	-7.35563e-06	0.049426	-99.4166	45122.2	-7.51705e-05	0.048305		#REF!	#REF!
41.6504	206.978	-1.78292e-07	0.124828	-11.0436	396.817	-4.94683e-07	0.124828	-60.9349	1048.62	-1.581e-06	0.124828	-79.0028	1399.01	-2.16495e-06	0.0852282	-91.689	2994.93	-4.82468e-06	0.0698277	-96.1204	4697.14	-7.66158e-06	0.050426	-99.4247	47009	-7.83208e-05	0.049305		#REF!	#REF!
41.3201	209.391	-1.82314e-07	0.125828	-11.4375	402.284	-5.03795e-07	0.125828	-61.1851	1064.57	-1.60758e-06	0.125828	-79.221	1431.12	-2.21845e-06	0.0862282	-91.8015	3080.41	-4.96714e-06	0.0708277	-96.1944	4884.37	-7.97363e-06	0.051426	-99.4325	48934.4	-8.15357e-05	0.050305		#REF!	#REF!
40.9913	211.816	-1.86356e-07	0.126828	-11.828	407.787	-5.12967e-07	0.126828	-61.4321	1080.64	-1.63437e-06	0.126828	-79.4347	1463.58	-2.27256e-06	0.0872282	-91.911	3167.08	-5.1116e-06	0.0718277	-96.2656	5075.26	-8.29177e-06	0.052426	-99.4399	50898.5	-8.4815e-05	0.051305		#REF!	#REF!
40.6641	214.253	-1.90418e-07	0.127828	-12.215	413.327	-5.22199e-07	0.127828	-61.676	1096.84	-1.66135e-06	0.127828	-79.6441	1496.41	-2.32728e-06	0.0882282	-92.0177	3254.96	-5.25806e-06	0.0728277	-96.3342	5269.81	-8.61602e-06	0.053426	-99.4471	52901.2	-8.81589e-05	0.052305		#REF!	#REF!
40.3384	216.703	-1.945e-07	0.128828	-12.5986	418.903	-5.31493e-07	0.128828	-61.9169	1113.15	-1.68854e-06	0.128828	-79.8492	1529.61	-2.3826e-06	0.0892282	-92.1215	3344.04	-5.40653e-06	0.0738277	-96.4003	5468.02	-8.94636e-06	0.054426	-99.454	54942.5	-9.15673e-05	0.053305		#REF!	#REF!
40.0141	219.164	-1.98601e-07	0.129828	-12.9789	424.515	-5.40846e-07	0.129828	-62.1547	1129.58	-1.71593e-06	0.129828	-80.0503	1563.17	-2.43853e-06	0.0902282	-92.2227	3434.33	-5.557e-06	0.0748277	-96.4641	5669.88	-9.2828e-06	0.055426	-99.4606	57022.5	-9.50402e-05	0.054305		#REF!	#REF!
39.6914	221.637	-2.02723e-07	0.130828	-13.3559	430.164	-5.50261e-07	0.130828	-62.3896	1146.13	-1.74351e-06	0.130828	-80.2474	1597.09	-2.49507e-06	0.0912282	-92.3214	3525.82	-5.70948e-06	0.0758277	-96.5256	5875.4	-9.62533e-06	0.056426	-99.467	59141.1	-9.85776e-05	0.055305		#REF!	#REF!
39.3702	224.122	-2.06865e-07	0.131828	-13.7297	435.849	-5.59736e-07	0.131828	-62.6216	1162.8	-1.7713e-06	0.131828	-80.4406	1631.38	-2.55221e-06	0.0922282	-92.4175	3618.51	-5.86396e-06	0.0768277	-96.5851	6084.59	-9.97397e-06	0.057426	-99.4732	61298.3	-0.00010218	0.056305		#REF!	#REF!
39.0504	226.619	-2.11027e-07	0.132828	-14.1002	441.571	-5.69271e-07	0.132828	-62.8507	1179.6	-1.79929e-06	0.132828	-80.6301	1666.03	-2.60996e-06	0.0932282	-92.5113	3712.4	-6.02044e-06	0.0778277	-96.6425	6297.43	-1.03287e-05	0.058426	-99.4792	63494.2	-0.000105846	0.057305		#REF!	#REF!
38.7321	229.128	-2.15209e-07	0.133828	-14.4676	447.328	-5.78868e-07	0.133828	-63.077	1196.51	-1.82747e-06	0.133828	-80.816	1701.04	-2.66831e-06	0.0942282	-92.6028	3807.49	-6.17893e-06	0.0788277	-96.698	6513.93	-1.06895e-05	0.059426	-99.4849	65728.7	-0.000109577	0.058305		#REF!	#REF!
38.4153	231.649	-2.1941e-07	0.134828	-14.8319	453.123	-5.88525e-07	0.134828	-63.3007	1213.54	-1.85586e-06	0.134828	-80.9983	1736.42	-2.72728e-06	0.0952282	-92.6921	3903.79	-6.33942e-06	0.0798277	-96.7518	6734.08	-1.10565e-05	0.060426	-99.4905	68001.9	-0.000113372	0.059305		#REF!	#REF!
38.0999	234.182	-2.23632e-07	0.135828	-15.193	458.953	-5.98242e-07	0.135828	-63.5216	1230.69	-1.88445e-06	0.135828	-81.1772	1772.16	-2.78684e-06	0.0962282	-92.7792	4001.29	-6.50191e-06	0.0808277	-96.8038	6957.9	-1.14295e-05	0.061426	-99.4959	70313.7	-0.000117232	0.060305		#REF!	#REF!
37.7859	236.727	-2.27874e-07	0.136828	-15.5511	464.82	-6.0802e-07	0.136828	-63.7398	1247.96	-1.91323e-06	0.136828	-81.3527	1808.26	-2.84702e-06	0.0972282	-92.8643	4099.99	-6.66641e-06	0.0818277	-96.8542	7185.38	-1.18086e-05	0.062426	-99.5011	72664.1	-0.000121157	0.061305		#REF!	#REF!
37.4734	239.285	-2.32136e-07	0.137828	-15.9062	470.723	-6.17859e-07	0.137828	-63.9555	1265.36	-1.94222e-06	0.137828	-81.5251	1844.73	-2.9078e-06	0.0982282	-92.9475	4199.89	-6.83292e-06	0.0828277	-96.903	7416.51	-1.21938e-05	0.063426	-99.5061	75053.2	-0.000125146	0.062305		#REF!	#REF!
37.1622	241.854	-2.36418e-07	0.138828	-16.2583	476.663	-6.27758e-07	0.138828	-64.1686	1282.87	-1.97141e-06	0.138828	-81.6942	1881.57	-2.96919e-06	0.0992282	-93.0287	4301	-7.00142e-06	0.0838277	-96.9503	7651.3	-1.25851e-05	0.064426	-99.511	77480.9	-0.0001292	0.063305		#REF!	#REF!
36.8525	244.435	-2.40719e-07	0.139828	-16.6075	482.639	-6.37718e-07	0.139828	-64.3793	1300.5	-2.00079e-06	0.139828	-81.8603	1918.76	-3.03118e-06	0.100228	-93.108	4403.31	-7.17194e-06	0.0848277	-96.9962	7889.75	-1.29826e-05	0.065426	-99.5158	79947.2	-0.000133318	0.064305		#REF!	#REF!
36.7599	245.211	-2.42014e-07	0.140128	-16.7117	484.439	-6.40718e-07	0.140128	-64.442	1305.81	-2.00965e-06	0.140128	-81.9095	1929.99	-3.0499e-06	0.100528	-93.1315	4434.23	-7.22348e-06	0.0851277	-97.0097	7962	-1.3103e-05	0.065726	-99.5172	80694.7	-0.000134566	0.064605		#REF!	#REF!
36.6674	245.989	-2.4331e-07	0.140428	-16.8156	486.242	-6.43723e-07	0.140428	-64.5044	1311.14	-2.01852e-06	0.140428	-81.9585	1941.26	-3.06867e-06	0.100828	-93.1548	4465.27	-7.27521e-06	0.0854277	-97.023	8034.58	-1.32239e-05	0.066026	-99.5185	81445.6	-0.000135819	0.064905		#REF!	#REF!
36.575	246.768	-2.44608e-07	0.140728	-16.9193	488.049	-6.46734e-07	0.140728	-64.5667	1316.47	-2.02741e-06	0.140728	-82.0072	1952.55	-3.0875e-06	0.101128	-93.1779	4496.41	-7.32711e-06	0.0857277	-97.0363	8107.48	-1.33454e-05	0.066326	-99.5199	82200	-0.000137079	0.065205		#REF!	#REF!
36.4827	247.548	-2.45908e-07	0.141028	-17.0227	489.858	-6.4975e-07	0.141028	-64.6288	1321.82	-2.03632e-06	0.141028	-82.0557	1963.88	-3.10638e-06	0.101428	-93.2009	4527.66	-7.3792e-06	0.0860277	-97.0494	8180.72	-1.34675e-05	0.066626	-99.5212	82957.9	-0.000138344	0.065505		#REF!	#REF!
36.3905	248.329	-2.4721e-07	0.141328	-17.1259	491.671	-6.52771e-07	0.141328	-64.6906	1327.17	-2.04525e-06	0.141328	-82.1038	1975.24	-3.12531e-06	0.101728	-93.2237	4559.02	-7.43146e-06	0.0863277	-97.0625	8254.29	-1.35901e-05	0.066926	-99.5226	83719.2	-0.000139616	0.065805		#REF!	#REF!
36.2985	249.111	-2.48513e-07	0.141628	-17.2288	493.488	-6.55799e-07	0.141628	-64.7522	1332.54	-2.05419e-06	0.141628	-82.1518	1986.64	-3.1443e-06	0.102028	-93.2464	4590.49	-7.48391e-06	0.0866277	-97.0754	8328.18	-1.37133e-05	0.067226	-99.5239	84484	-0.000140893	0.066105		#REF!	#REF!
36.2066	249.894	-2.49818e-07	0.141928	-17.3314	495.307	-6.58831e-07	0.141928	-64.8136	1337.92	-2.06316e-06	0.141928	-82.1994	1998.06	-3.16334e-06	0.102328	-93.2689	4622.07	-7.53653e-06	0.0869277	-97.0882	8402.4	-1.3837e-05	0.067526	-99.5252	85252.3	-0.000142176	0.066405		#REF!	#REF!
36.1149	250.678	-2.51125e-07	0.142228	-17.4338	497.13	-6.61869e-07	0.142228	-64.8748	1343.31	-2.07214e-06	0.142228	-82.2469	2009.52	-3.18244e-06	0.102628	-93.2913	4653.75	-7.58934e-06	0.0872277	-97.1009	8476.96	-1.39612e-05	0.067826	-99.5265	86024.1	-0.000143464	0.066705		#REF!	#REF!
36.0232	251.464	-2.52434e-07	0.142528	-17.5359	498.956	-6.64912e-07	0.142528	-64.9358	1348.71	-2.08114e-06	0.142528	-82.294	2021.01	-3.2016e-06	0.102928	-93.3135	4685.55	-7.64233e-06	0.0875277	-97.1134	8551.84	-1.4086e-05	0.068126	-99.5278	86799.4	-0.000144759	0.067005		#REF!	#REF!
35.9317	252.25	-2.53745e-07	0.142828	-17.6378	500.785	-6.67961e-07	0.142828	-64.9965	1354.12	-2.09015e-06	0.142828	-82.3409	2032.54	-3.2208e-06	0.103228	-93.3356	4717.45	-7.69549e-06	0.0878277	-97.1259	8627.05	-1.42114e-05	0.068426	-99.5291	87578.1	-0.000146059	0.067305		#REF!	#REF!
35.8403	253.038	-2.55057e-07	0.143128	-17.7394	502.618	-6.71016e-07	0.143128	-65.0571	1359.54	-2.09919e-06	0.143128	-82.3876	2044.1	-3.24007e-06	0.103528	-93.3575	4749.46	-7.74884e-06	0.0881277	-97.1383	8702.59	-1.43373e-05	0.068726	-99.5304	88360.3	-0.000147365	0.067605		#REF!	#REF!
35.749	253.826	-2.56372e-07	0.143428	-17.8408	504.454	-6.74075e-07	0.143428	-65.1174	1364.97	-2.10824e-06	0.143428	-82.434	2055.69	-3.25938e-06	0.103828	-93.3793	4781.57	-7.80237e-06	0.0884277	-97.1505	8778.46	-1.44637e-05	0.069026	-99.5316	89146	-0.000148677	0.067905		#REF!	#REF!
35.6578	254.616	-2.57688e-07	0.143728	-17.9419	506.293	-6.77141e-07	0.143728	-65.1775	1370.41	-2.11731e-06	0.143728	-82.4802	2067.31	-3.27875e-06	0.104128	-93.401	4813.8	-7.85608e-06	0.0887277	-97.1627	8854.66	-1.45907e-05	0.069326	-99.5329	89935.2	-0.000149994	0.068205		#REF!	#REF!
35.5668	255.407	-2.59005e-07	0.144028	-18.0428	508.135	-6.80211e-07	0.144028	-65.2375	1375.87	-2.1264e-06	0.144028	-82.5261	2078.96	-3.29818e-06	0.104428	-93.4225	4846.13	-7.90997e-06	0.0890277	-97.1747	8931.19	-1.47183e-05	0.069626	-99.5341	90727.8	-0.000151318	0.068505		#REF!	#REF!
35.4759	256.198	-2.60325e-07	0.144328	-18.1435	509.981	-6.83288e-07	0.144328	-65.2972	1381.33	-2.13551e-06	0.144328	-82.5718	2090.65	-3.31766e-06	0.104728	-93.4438	4878.58	-7.96404e-06	0.0893277	-97.1867	9008.05	-1.48464e-05	0.069926	-99.5354	91524	-0.000152647	0.068805		#REF!	#REF!
35.3851	256.991	-2.61647e-07	0.144628	-18.2438	511.83	-6.86369e-07	0.144628	-65.3567	1386.81	-2.14463e-06	0.144628	-82.6173	2102.37	-3.3372e-06	0.105028	-93.4651	4911.13	-8.01829e-06	0.0896277	-97.1985	9085.24	-1.4975e-05	0.070226	-99.5366	92323.6	-0.000153982	0.069105		#REF!	#REF!
35.2944	257.785	-2.6297e-07	0.144928	-18.344	513.682	-6.89456e-07	0.144928	-65.416	1392.29	-2.15378e-06	0.144928	-82.6625	2114.13	-3.35678e-06	0.105328	-93.4862	4943.78	-8.07272e-06	0.0899277	-97.2102	9162.75	-1.51042e-05	0.070526	-99.5378	93126.6	-0.000155323	0.069405		#REF!	#REF!
35.2039	258.58	-2.64295e-07	0.145228	-18.4439	515.538	-6.92549e-07	0.145228	-65.4751	1397.79	-2.16294e-06	0.145228	-82.7075	2125.92	-3.37643e-06	0.105628	-93.5071	4976.55	-8.12733e-06	0.0902277	-97.2219	9240.6	-1.5234e-05	0.070826	-99.539	93933.2	-0.00015667	0.069705		#REF!	#REF!
35.1135	259.376	-2.65622e-07	0.145528	-18.5435	517.397	-6.95647e-07	0.145528	-65.534	1403.3	-2.17212e-06	0.145528	-82.7522	2137.73	-3.39613e-06	0.105928	-93.5279	5009.43	-8.18212e-06	0.0905277	-97.2334	9318.77	-1.53643e-05	0.071126	-99.5402	94743.2	-0.000158022	0.070005		#REF!	#REF!
35.0232	260.174	-2.6695e-07	0.145828	-18.6429	519.259	-6.9875e-07	0.145828	-65.5927	1408.82	-2.18131e-06	0.145828	-82.7968	2149.59	-3.41588e-06	0.106228	-93.5486	5042.41	-8.23709e-06	0.0908277	-97.2449	9397.28	-1.54951e-05	0.071426	-99.5413	95556.7	-0.000159381	0.070305		#REF!	#REF!
34.933	260.972	-2.68281e-07	0.146128	-18.7421	521.124	-7.01859e-07	0.146128	-65.6513	1414.34	-2.19053e-06	0.146128	-82.8411	2161.47	-3.43569e-06	0.106528	-93.5692	5075.5	-8.29224e-06	0.0911277	-97.2563	9476.11	-1.56265e-05	0.071726	-99.5425	96373.7	-0.000160745	0.070605		#REF!	#REF!
34.8429	261.771	-2.69613e-07	0.146428	-18.841	522.993	-7.04973e-07	0.146428	-65.7096	1419.88	-2.19976e-06	0.146428	-82.8851	2173.39	-3.45555e-06	0.106828	-93.5896	5108.7	-8.34757e-06	0.0914277	-97.2675	9555.28	-1.57584e-05	0.072026	-99.5437	97194.2	-0.000162115	0.070905		#REF!	#REF!
34.753	262.572	-2.70947e-07	0.146728	-18.9397	524.865	-7.08093e-07	0.146728	-65.7677	1425.44	-2.20901e-06	0.146728	-82.929	2185.34	-3.47547e-06	0.107128	-93.6099	5142.01	-8.40308e-06	0.0917277	-97.2787	9634.77	-1.58909e-05	0.072326	-99.5448	98018.1	-0.000163491	0.071205		#REF!	#REF!
34.6631	263.373	-2.72283e-07	0.147028	-19.0382	526.74	-7.11218e-07	0.147028	-65.8256	1431	-2.21828e-06	0.147028	-82.9726	2197.32	-3.49544e-06	0.107428	-93.6301	5175.42	-8.45878e-06	0.0920277	-97.2898	9714.59	-1.60239e-05	0.072626	-99.5459	98845.6	-0.000164872	0.071505		#REF!	#REF!
34.5734	264.176	-2.73621e-07	0.147328	-19.1364	528.618	-7.14349e-07	0.147328	-65.8833	1436.57	-2.22757e-06	0.147328	-83.016	2209.34	-3.51547e-06	0.107728	-93.6501	5208.95	-8.51465e-06	0.0923277	-97.3008	9794.74	-1.61575e-05	0.072926	-99.5471	99676.5	-0.000166259	0.071805		#REF!	#REF!
34.4838	264.979	-2.7496e-07	0.147628	-19.2343	530.5	-7.17485e-07	0.147628	-65.9408	1442.15	-2.23687e-06	0.147628	-83.0591	2221.39	-3.53555e-06	0.108028	-93.67	5242.58	-8.5707e-06	0.0926277	-97.3117	9875.22	-1.62917e-05	0.073226	-99.5482	100511	-0.000167653	0.072105		#REF!	#REF!
34.3944	265.784	-2.76301e-07	0.147928	-19.3321	532.385	-7.20627e-07	0.147928	-65.9982	1447.75	-2.2462e-06	0.147928	-83.1021	2233.47	-3.55568e-06	0.108328	-93.6898	5276.32	-8.62694e-06	0.0929277	-97.3225	9956.03	-1.64263e-05	0.073526	-99.5493	101349	-0.000169052	0.072405		#REF!	#REF!
34.305	266.59	-2.77644e-07	0.148228	-19.4296	534.273	-7.23774e-07	0.148228	-66.0553	1453.35	-2.25554e-06	0.148228	-83.1448	2245.58	-3.57587e-06	0.108628	-93.7095	5310.17	-8.68335e-06	0.0932277	-97.3332	10037.2	-1.65616e-05	0.073826	-99.5504	102190	-0.000170456	0.072705		#REF!	#REF!
34.2158	267.397	-2.78989e-07	0.148528	-19.5268	536.165	-7.26927e-07	0.148528	-66.1122	1458.97	-2.2649e-06	0.148528	-83.1874	2257.73	-3.59612e-06	0.108928	-93.729	5344.13	-8.73995e-06	0.0935277	-97.3439	10118.6	-1.66974e-05	0.074126	-99.5515	103035	-0.000171867	0.073005		#REF!	#REF!
																													#REF!	#REF!
																													#REF!	#REF!
																													#REF!	#REF!
																													#REF!	#REF!
																													#REF!	#REF!
																													#REF!	#REF!

## Sheet: Fig. 7b + Suppl.Fig.1 Cat_tot
KHomo = 33																								KHomo = 330
[Cattot] = 0.01				[Cattot] = 0.03				[Cattot] = 0.1				[Cattot] = 0.3				[Cattot] = 1				[Cattot] = 10				[Cattot] = 0.003				[Cattot] = 0.01				[Cattot] = 0.1				[Cattot] = 1				k1	KHomo	ee1	[Cattot]
eeP	eeL	β	α	eeP	eeL	β	α	eeP	eeL	β	α	eeP	eeL	β	α	eeP	eeL	β	α	eeP	eeL	β	α	eeP	eeL	β	α	eeP	eeL	β	α	eeP	eeL	β	α	eeP	eeL	β	α	10	33 or 330	1	var
1.15154e-06	5.29333e-08	4.77825e-08	0.000437184	0	0	1.46082e-07	0.000764412	0	0	4.92656e-07	0.00140379	0	0	1.48683e-06	0.00243871	0	0	4.97441e-06	0.00446068	5.04468e-07	3.18145e-09	4.98964e-05	0.0141275	9.74806e-07	9.90142e-08	1.37373e-08	0.000234412	0	0	4.75068e-08	0.000435921	#NUM!	#NUM!	4.89769e-07	0.00139967	#NUM!	#NUM!	4.94512e-06	0.00444753	k2	KHetero	ee2
6.68588	0.308082	4.77772e-08	0.000438184	4.95399	0.137946	1.46076e-07	0.000765412	3.53084	0.0581537	4.9265e-07	0.00140479	2.53728	0.027104	1.48682e-06	0.00243971	3.76293	0.0274016	4.97437e-06	0.00446568	1.62788	0.0102876	4.98963e-05	0.0141375	8.39814	0.857885	1.37307e-08	0.000235412	5.49324	0.387491	4.74989e-08	0.000436921	2.87784	0.178371	4.89726e-07	0.00140267	-4.1253	0.267446	4.94339e-06	0.00449753	10	100000	-1
9.43821	0.435965	4.7772e-08	0.000439184	6.99853	0.19516	1.46071e-07	0.000766412	4.99028	0.0822612	4.92644e-07	0.00140579	3.58686	0.0383369	1.48681e-06	0.00244071	6.50113	0.0475116	4.97429e-06	0.00447568	2.2986	0.0145564	4.98961e-05	0.0141475	11.8285	1.21516	1.37241e-08	0.000236412	7.74857	0.548583	4.7491e-08	0.000437921	4.05093	0.252648	4.89683e-07	0.00140567	-5.90019	0.382433	4.94163e-06	0.00454753	k2'
11.5386	0.534278	4.77667e-08	0.000440184	8.5623	0.239113	1.46065e-07	0.000767412	6.10804	0.100773	4.92638e-07	0.00140679	4.39127	0.0469604	1.48681e-06	0.00244171	8.37179	0.0614027	4.97421e-06	0.00448568	2.81084	0.0178371	4.9896e-05	0.0141575	14.4284	1.49063	1.37175e-08	0.000237412	9.46559	0.672594	4.7483e-08	0.000438921	4.93827	0.309912	4.8964e-07	0.00140867	-7.30309	0.473554	4.93986e-06	0.00459753	0
13.2997	0.617314	4.77614e-08	0.000441184	9.87638	0.27621	1.46059e-07	0.000768412	7.04861	0.11639	4.92632e-07	0.00140779	5.06862	0.0542338	1.4868e-06	0.00244271	9.88074	0.0727302	4.97413e-06	0.00449568	3.24066	0.0206071	4.98959e-05	0.0141675	16.5934	1.72397	1.37109e-08	0.000238412	13.2837	0.954248	4.74592e-08	0.000441921	5.67571	0.358413	4.89597e-07	0.00141167	-8.51715	0.552804	4.93808e-06	0.00464753
14.843	0.690606	4.77561e-08	0.000442184	11.0304	0.308931	1.46054e-07	0.000769412	7.87573	0.130159	4.92626e-07	0.00140879	5.66467	0.0606448	1.48679e-06	0.00244371	13.3643	0.0994317	4.9739e-06	0.00452568	3.61755	0.0230514	4.98957e-05	0.0141775	21.6891	2.29144	1.3691e-08	0.000241412	16.145	1.17246	4.74352e-08	0.000444921	6.88688	0.44033	4.8951e-07	0.00141767	-10.6225	0.691794	4.93445e-06	0.00474753
19.7727	0.928842	4.77349e-08	0.000446184	14.7364	0.415112	1.46032e-07	0.000773412	10.5404	0.174792	4.92603e-07	0.00141279	7.58809	0.0814152	1.48677e-06	0.00244771	16.0364	0.120591	4.97366e-06	0.00455568	3.9567	0.0252646	4.98956e-05	0.0141875	25.6181	2.75176	1.3671e-08	0.000244412	18.5014	1.35816	4.74112e-08	0.000447921	7.8787	0.510028	4.89423e-07	0.00142367	-12.4653	0.815962	4.93076e-06	0.00484753
23.5969	1.11908	4.77137e-08	0.000450184	17.6366	0.499668	1.4601e-07	0.000777412	12.6369	0.210273	4.92579e-07	0.00141679	9.10554	0.0979111	1.48674e-06	0.00245171	18.2588	0.138767	4.97341e-06	0.00458568	4.26711	0.027303	4.98954e-05	0.0141975	28.8692	3.15228	1.3651e-08	0.000247412	22.3204	1.67402	4.7363e-08	0.000453921	8.72728	0.571995	4.89336e-07	0.00142967	-14.1383	0.931572	4.927e-06	0.00494753
26.7966	1.28287	4.76925e-08	0.000454184	20.084	0.572267	1.45988e-07	0.000781412	14.4156	0.240683	4.92555e-07	0.00142079	10.3964	0.112037	1.48671e-06	0.00245571	20.1825	0.155015	4.97317e-06	0.00461568	4.55468	0.0292033	4.98953e-05	0.0142075	31.6592	3.51355	1.3631e-08	0.000250412	25.3922	1.94526	4.73146e-08	0.000459921	9.923	0.663888	4.89191e-07	0.00143967	-18.5142	1.25255	4.91533e-06	0.00524753
29.5777	1.42932	4.76713e-08	0.000458184	22.2294	0.637012	1.45966e-07	0.000785412	15.983	0.267757	4.92531e-07	0.00142479	11.537	0.124601	1.48669e-06	0.00245971	21.888	0.16989	4.97293e-06	0.00464568	4.82349	0.0309907	4.98951e-05	0.0142175	34.1079	3.84669	1.36109e-08	0.000253412	27.9743	2.18861	4.7266e-08	0.000465921	10.9247	0.746062	4.89044e-07	0.00144967	-22.2613	1.5574	4.90306e-06	0.00554753
32.052	1.56332	4.765e-08	0.000462184	24.1542	0.696096	1.45944e-07	0.000789412	17.3965	0.292423	4.92507e-07	0.00142879	12.5684	0.136037	1.48666e-06	0.00246371	23.4244	0.183727	4.97269e-06	0.00467568	5.07655	0.032684	4.9895e-05	0.0142275	38.2556	4.45351	1.35704e-08	0.000259412	30.2014	2.41258	4.72171e-08	0.000471921	11.7848	0.821454	4.88897e-07	0.00145967	-25.5778	1.85885	4.8902e-06	0.00584753
37.2923	1.86097	4.75969e-08	0.000472184	28.2884	0.826763	1.45888e-07	0.000799412	20.4596	0.346814	4.92448e-07	0.00143879	14.8137	0.161216	1.48659e-06	0.00247371	24.8244	0.196745	4.97245e-06	0.00470568	5.3161	0.034297	4.98949e-05	0.0142375	41.675	5.00496	1.35298e-08	0.000265412	33.3329	2.75561	4.71351e-08	0.000481921	12.5353	0.8918	4.8875e-07	0.00146967	-28.5629	2.16259	4.87673e-06	0.00614753
41.5971	2.12282	4.75437e-08	0.000482184	31.7537	0.941005	1.45833e-07	0.000809412	23.0601	0.394174	4.92388e-07	0.00144879	16.7326	0.18309	1.48653e-06	0.00248371	28.7623	0.235918	4.97163e-06	0.00480568	5.5439	0.0358405	4.98947e-05	0.0142475	44.563	5.51791	1.34889e-08	0.000271412	35.9249	3.07189	4.70524e-08	0.000491921	14.3114	1.08219	4.88303e-07	0.00149967	-31.2784	2.47169	4.86267e-06	0.00644753
45.256	2.36084	4.74905e-08	0.000492184	34.7571	1.04423	1.45778e-07	0.000819412	25.3424	0.436796	4.92329e-07	0.00145879	18.4277	0.202734	1.48646e-06	0.00249371	31.908	0.270725	4.97081e-06	0.00490568	5.76136	0.0373233	4.98946e-05	0.0142575	47.042	6.00245	1.34477e-08	0.000277412	38.1117	3.36916	4.6969e-08	0.000501921	15.59	1.25255	4.8785e-07	0.00152967	-33.767	2.788	4.84801e-06	0.00674753
48.4335	2.58163	4.74372e-08	0.000502184	37.4153	1.13945	1.45722e-07	0.000829412	27.3875	0.475957	4.92269e-07	0.00146879	19.9566	0.220742	1.48639e-06	0.00250371	34.5066	0.302697	4.96998e-06	0.00500568	5.96961	0.0387522	4.98944e-05	0.0142675	49.1948	6.46517	1.34064e-08	0.000283412	42.99	4.18788	4.6715e-08	0.000531921	16.5275	1.41039	4.87391e-07	0.00155967	-36.0609	3.1127	4.83276e-06	0.00704753
51.2349	2.78931	4.73838e-08	0.000512184	39.8025	1.22852	1.45667e-07	0.000839412	29.2465	0.512451	4.92209e-07	0.00147879	21.3554	0.237488	1.48633e-06	0.00251371	36.6978	0.332672	4.96915e-06	0.00510568	6.16959	0.040133	4.98943e-05	0.0142775	51.0802	6.91066	1.33647e-08	0.000289412	46.2064	4.94151	4.6455e-08	0.000561921	17.213	1.55973	4.86926e-07	0.00158967	-38.1853	3.44659	4.8169e-06	0.00734753
53.7322	2.98663	4.73303e-08	0.000522184	41.9693	1.3127	1.45611e-07	0.000849412	30.9542	0.546813	4.92149e-07	0.00148879	22.6485	0.253223	1.48626e-06	0.00252371	38.5707	0.361166	4.96831e-06	0.00520568	6.36209	0.0414705	4.98941e-05	0.0142875	52.7423	7.34223	1.33229e-08	0.000295412	48.3658	5.65943	4.6189e-08	0.000591921	18.0395	1.8418	4.85978e-07	0.00164967	-40.1606	3.79025	4.80045e-06	0.00764753
55.9779	3.17554	4.72768e-08	0.000532184	43.9521	1.39288	1.45555e-07	0.000859412	32.5354	0.579424	4.9209e-07	0.00149879	23.8535	0.268125	1.48619e-06	0.00253371	42.8156	0.440721	4.96575e-06	0.00550568	6.54777	0.0427689	4.9894e-05	0.0142975	55.1052	8.0371	1.32526e-08	0.000305412	49.8001	6.35678	4.59171e-08	0.000621921	18.3538	2.11015	4.85007e-07	0.00170967	-42.0034	4.1441	4.78339e-06	0.00794753
58.0111	3.35746	4.72232e-08	0.000542184	45.7783	1.46972	1.455e-07	0.000869412	34.0087	0.610565	4.9203e-07	0.00150879	24.9834	0.282325	1.48613e-06	0.00254371	45.6561	0.51482	4.96312e-06	0.00580568	6.7272	0.0440315	4.98938e-05	0.0143075	57.0561	8.70837	1.31816e-08	0.000315412	51.2387	7.72215	4.53552e-08	0.000681921	18.3153	2.37063	4.84011e-07	0.00176967	-45.3459	4.88356	4.7475e-06	0.00854753
59.8626	3.53349	4.71696e-08	0.000552184	47.4693	1.54372	1.45444e-07	0.000879412	35.3886	0.640451	4.9197e-07	0.00151879	26.0482	0.295926	1.48606e-06	0.00255371	47.5772	0.585858	4.96044e-06	0.00610568	6.90088	0.0452614	4.98937e-05	0.0143175	58.6776	9.36181	1.311e-08	0.000325412	51.4752	9.07805	4.47694e-08	0.000741921	18.0234	2.62668	4.82992e-07	0.00182967	-48.3023	5.66674	4.70921e-06	0.00914753
65.8742	4.19338	4.69543e-08	0.000592184	53.175	1.81814	1.4522e-07	0.000919412	40.1723	0.75037	4.91729e-07	0.00155879	29.7953	0.345705	1.48579e-06	0.00259371	48.8555	0.655124	4.9577e-06	0.00640568	7.06923	0.0464611	4.98936e-05	0.0143275	60.0308	10.0015	1.30377e-08	0.000335412	50.9881	10.4443	4.41597e-08	0.000801921	17.1468	3.0492	4.8124e-07	0.00192967	-50.9397	6.49475	4.66853e-06	0.00974753
70.3077	4.80443	4.6738e-08	0.000632184	57.6446	2.06822	1.44995e-07	0.000959412	44.0842	0.849295	4.91487e-07	0.00159879	32.9345	0.390164	1.48552e-06	0.00263371	49.6653	0.723398	4.9549e-06	0.00670568	7.23264	0.047633	4.98934e-05	0.0143375	62.1075	11.2515	1.28912e-08	0.000355412	50.046	11.8323	4.35261e-08	0.000861921	15.9464	3.47164	4.79421e-07	0.00202967	-53.3095	7.36833	4.62546e-06	0.0103475
73.6923	5.38379	4.65207e-08	0.000672184	61.2536	2.30205	1.44769e-07	0.000999412	47.3751	0.940732	4.91244e-07	0.00163879	35.638	0.430962	1.48525e-06	0.00267371	50.1238	0.791189	4.95204e-06	0.00700568	7.39143	0.048779	4.98933e-05	0.0143475	63.5498	12.4754	1.2742e-08	0.000375412	48.8111	13.2488	4.28685e-08	0.000921921	14.5435	3.89775	4.77536e-07	0.00212967	-55.4522	8.28799	4.57999e-06	0.0109475
76.338	5.94121	4.63023e-08	0.000712184	64.2275	2.52428	1.44542e-07	0.00103941	50.1955	1.02671	4.91e-07	0.00167879	38.0087	0.469062	1.48498e-06	0.00271371	50.313	0.858849	4.94912e-06	0.00730568	7.5459	0.049901	4.98931e-05	0.0143575	64.5274	13.6841	1.25901e-08	0.000395412	47.386	14.6985	4.21871e-08	0.000981921	13.0151	4.32992	4.75585e-07	0.00222967	-57.4	9.2541	4.53213e-06	0.0115475
78.4417	6.48278	4.60828e-08	0.000752184	66.7143	2.73785	1.44314e-07	0.00107941	52.645	1.10854	4.90755e-07	0.00171879	40.1141	0.505084	1.48471e-06	0.00275371	50.2927	0.926632	4.94615e-06	0.00760568	7.69632	0.0510005	4.9893e-05	0.0143675	65.1555	14.8851	1.24355e-08	0.000415412	45.838	16.1847	4.14817e-08	0.00104192	11.4122	4.76977	4.73567e-07	0.00232967	-59.1794	10.2669	4.48189e-06	0.0121475
81.5127	7.53343	4.56407e-08	0.000832184	70.6097	3.1464	1.43854e-07	0.00115941	56.6922	1.26301	4.90262e-07	0.00179879	43.7064	0.572467	1.48416e-06	0.00283371	50.1071	0.994725	4.94311e-06	0.00790568	7.84292	0.0520789	4.98928e-05	0.0143775	65.5154	16.0833	1.22783e-08	0.000435412	44.213	17.7095	4.07524e-08	0.00110192	8.11035	5.67681	4.69332e-07	0.00252967	-60.812	11.3267	4.42925e-06	0.0127475
83.5671	8.5562	4.51943e-08	0.000912184	73.4775	3.53789	1.43391e-07	0.00123941	59.8898	1.40872	4.89764e-07	0.00187879	46.668	0.635307	1.48361e-06	0.00291371	49.7901	1.06327	4.94001e-06	0.00820568	7.98592	0.0531376	4.98927e-05	0.0143875	65.6662	17.2827	1.21185e-08	0.000455412	42.5423	19.2748	3.99992e-08	0.00116192	4.80563	6.62488	4.64831e-07	0.00272967	-62.3156	12.4335	4.37422e-06	0.0133475
84.9634	9.56242	4.47437e-08	0.000992184	75.6308	3.91812	1.42923e-07	0.00131941	62.4629	1.54831	4.89263e-07	0.00195879	49.1525	0.694884	1.48305e-06	0.00299371	49.3678	1.13239	4.93686e-06	0.00850568	8.12551	0.0541776	4.98925e-05	0.0143975	65.6518	18.486	1.1956e-08	0.000475412	40.8483	20.8817	3.92221e-08	0.00122192	1.57981	7.61755	4.60064e-07	0.00292967	-63.7054	13.5876	4.31679e-06	0.0139475
85.9128	10.559	4.42889e-08	0.00107218	77.2668	4.29068	1.42451e-07	0.00139941	64.5594	1.68345	4.88757e-07	0.00203879	51.2622	0.752014	1.48249e-06	0.00307371	48.2846	1.27267	4.93036e-06	0.00910568	8.26188	0.0552001	4.98924e-05	0.0144075	65.391	20.3032	1.17072e-08	0.000505412	39.1465	22.5314	3.8421e-08	0.00128192	-1.52765	8.65706	4.55032e-07	0.00312967	-64.9941	14.7889	4.25698e-06	0.0145475
86.5474	11.5504	4.38299e-08	0.00115218	78.5168	4.65799	1.41974e-07	0.00147941	66.2823	1.81528	4.88247e-07	0.00211879	53.0691	0.807257	1.48193e-06	0.00315371	46.9765	1.41609	4.92364e-06	0.00970568	8.39518	0.056206	4.98922e-05	0.0144175	64.9139	22.1399	1.14525e-08	0.000535412	36.8847	24.7987	3.73157e-08	0.00136192	-4.49938	9.7449	4.49734e-07	0.00332967	-66.5737	16.4644	4.1735e-06	0.0153475
87.0268	12.787	4.32502e-08	0.00125218	79.6727	5.11228	1.41373e-07	0.00157941	68.0221	1.97661	4.87603e-07	0.00221879	54.9818	0.874256	1.48122e-06	0.00325371	45.521	1.56302	4.91667e-06	0.0103057	8.52556	0.0571962	4.98921e-05	0.0144275	64.2778	23.9999	1.11918e-08	0.000565412	34.6473	27.1448	3.61679e-08	0.00144192	-7.3299	10.8821	4.4417e-07	0.00352967	-68.0143	18.2243	4.08578e-06	0.0161475
87.2581	14.0244	4.26639e-08	0.00135218	80.4894	5.56329	1.40765e-07	0.00167941	69.3991	2.13514	4.86953e-07	0.00231879	56.581	0.93949	1.4805e-06	0.00335371	43.9704	1.71371	4.90946e-06	0.0109057	8.65315	0.0581715	4.9892e-05	0.0144375	63.5239	25.8864	1.09251e-08	0.000595412	32.4463	29.5707	3.49776e-08	0.00152192	-11.314	12.6822	4.35326e-07	0.00382967	-69.334	20.0687	3.9938e-06	0.0169475
87.3128	15.2655	4.20709e-08	0.00145218	81.0515	6.01265	1.40151e-07	0.00177941	70.4894	2.29168	4.86296e-07	0.00241879	57.9236	1.00337	1.47977e-06	0.00345371	42.3606	1.86836	4.90202e-06	0.0115057	8.77809	0.0591326	4.98918e-05	0.0144475	62.682	27.8017	1.06525e-08	0.000625412	30.2893	32.0774	3.37448e-08	0.00160192	-14.9994	14.5968	4.25884e-07	0.00412967	-70.5475	21.9976	3.89757e-06	0.0177475
87.2385	16.5124	4.14714e-08	0.00155218	81.4184	6.46155	1.39529e-07	0.00187941	71.3494	2.44682	4.85633e-07	0.00251879	59.0534	1.06619	1.47904e-06	0.00355371	40.717	2.0271	4.89434e-06	0.0121057	8.90048	0.0600803	4.98917e-05	0.0144575	61.7744	29.7475	1.03738e-08	0.000655412	28.1809	34.6654	3.24695e-08	0.00168192	-18.409	16.6272	4.15844e-07	0.00442967	-71.6673	24.0112	3.79709e-06	0.0185475
87.0682	17.7664	4.08652e-08	0.00165218	81.6333	6.91087	1.38902e-07	0.00197941	72.022	2.60101	4.84963e-07	0.00261879	60.0042	1.12819	1.4783e-06	0.00365371	39.0575	2.19005	4.88642e-06	0.0127057	9.02044	0.061015	4.98915e-05	0.0144675	60.8178	31.7252	1.00892e-08	0.000685412	26.1236	37.3354	3.11516e-08	0.00176192	-21.5671	18.7742	4.05206e-07	0.00472967	-72.704	26.1095	3.69235e-06	0.0193475
86.8252	19.0287	4.02525e-08	0.00175218	81.7281	7.36128	1.38267e-07	0.00207941	72.5403	2.75461	4.84286e-07	0.00271879	60.8032	1.18955	1.47756e-06	0.00375371	37.3951	2.3573	4.87827e-06	0.0133057	9.13807	0.0619375	4.98914e-05	0.0144775	59.8251	33.736	9.79862e-09	0.000715412	24.1189	40.0877	2.97912e-08	0.00184192	-24.4972	21.0385	3.9397e-07	0.00502967	-73.6667	28.2925	3.58337e-06	0.0201475
86.5263	20.3001	3.96331e-08	0.00185218	81.7269	7.8133	1.37626e-07	0.00217941	72.9304	2.90789	4.83603e-07	0.00281879	61.472	1.25043	1.47681e-06	0.00385371	35.7392	2.52891	4.86987e-06	0.0139057	9.25345	0.0628483	4.98912e-05	0.0144875	58.8061	35.7808	9.50204e-09	0.000745412	22.167	42.9228	2.83883e-08	0.00192192	-27.2211	23.4204	3.82136e-07	0.00532967	-74.563	30.5603	3.47013e-06	0.0209475
86.1841	21.5813	3.90072e-08	0.00195218	81.6482	8.26737	1.36979e-07	0.00227941	73.213	3.06109	4.82913e-07	0.00291879	62.0287	1.31093	1.47605e-06	0.00395371	34.0966	2.70493	4.86124e-06	0.0145057	9.36668	0.0637478	4.98911e-05	0.0144975	57.7686	37.8603	9.19948e-09	0.000775412	20.2677	45.8409	2.69428e-08	0.00200192	-29.7586	25.9204	3.69704e-07	0.00562967	-75.3998	32.913	3.35264e-06	0.0217475
85.8079	22.8728	3.83746e-08	0.00205218	81.5063	8.7238	1.36325e-07	0.00237941	73.4047	3.21437	4.82217e-07	0.00301879	62.488	1.37115	1.47528e-06	0.00405371	32.4723	2.88542	4.85237e-06	0.0151057	9.47783	0.0646366	4.98909e-05	0.0145075	56.7186	39.9752	8.89095e-09	0.000805412	18.4202	48.8422	2.54549e-08	0.00208192	-32.1272	28.5387	3.56674e-07	0.00592967	-76.1827	35.3505	3.2309e-06	0.0225475
85.4048	24.1751	3.77355e-08	0.00215218	81.3124	9.18288	1.35664e-07	0.00247941	73.5193	3.3679	4.81514e-07	0.00311879	62.8624	1.43119	1.47451e-06	0.00415371	29.8148	3.19624	4.83706e-06	0.0161057	9.58698	0.0655151	4.98908e-05	0.0145175	55.661	42.126	8.57643e-09	0.000835412	16.6234	51.9271	2.39244e-08	0.00216192	-34.3426	31.2755	3.43047e-07	0.00622967	-76.9169	37.8729	3.1049e-06	0.0233475
84.9804	25.4885	3.70897e-08	0.00225218	81.0757	9.64484	1.34996e-07	0.00257941	73.5679	3.5218	4.80804e-07	0.00321879	63.1621	1.4911	1.47373e-06	0.00425371	27.2282	3.5197	4.82109e-06	0.0171057	9.69421	0.0663836	4.98906e-05	0.0145275	54.5995	44.3132	8.25593e-09	0.000865412	14.8762	55.0956	2.23514e-08	0.00224192	-36.419	34.1309	3.28821e-07	0.00652967	-77.6069	40.4801	2.97465e-06	0.0241475
84.5391	26.8132	3.64373e-08	0.00235218	80.8032	10.1099	1.34322e-07	0.00267941	73.5598	3.67617	4.80088e-07	0.00331879	63.3962	1.55094	1.47295e-06	0.00435371	24.7179	3.8559	4.80446e-06	0.0181057	9.79957	0.0672427	4.98905e-05	0.0145375	53.5372	46.5371	7.92946e-09	0.000895412	13.177	58.3478	2.07359e-08	0.00232192	-38.3687	37.1051	3.13998e-07	0.00682967	-78.4129	43.8586	2.80587e-06	0.0251475
84.0842	28.1495	3.57783e-08	0.00245218	80.5009	10.5781	1.33642e-07	0.00277941	73.5027	3.83111	4.79365e-07	0.00341879	63.5722	1.61077	1.47216e-06	0.00445371	22.2863	4.20492	4.78717e-06	0.0191057	9.90314	0.0680926	4.98904e-05	0.0145475	52.4766	48.7981	7.597e-09	0.000925412	11.5246	61.6841	1.90779e-08	0.00240192	-40.2028	40.1982	2.98576e-07	0.00712967	-79.1626	47.3697	2.63044e-06	0.0261475
83.6185	29.4976	3.51127e-08	0.00255218	80.1736	11.0497	1.32955e-07	0.00287941	73.4031	3.9867	4.78636e-07	0.00351879	63.6966	1.67063	1.47136e-06	0.00455371	19.9338	4.56681	4.76922e-06	0.0201057	15.6383	0.131656	4.98754e-05	0.0155475	51.4196	51.0964	7.25856e-09	0.000955412	9.91737	65.1043	1.73773e-08	0.00248192	-41.9312	43.4103	2.82557e-07	0.00742967	-79.8616	51.0136	2.44836e-06	0.0271475
83.1441	30.8577	3.44406e-08	0.00265218	79.8252	11.5247	1.32261e-07	0.00297941	73.2667	4.143	4.779e-07	0.00361879	63.7751	1.73055	1.47056e-06	0.00465371	17.6595	4.94164	4.75061e-06	0.0211057	17.5613	0.180434	4.98598e-05	0.0165475	50.3678	53.4323	6.91415e-09	0.000985412	8.35382	68.6087	1.56342e-08	0.00256192	-43.5626	46.7415	2.65939e-07	0.00772967	-80.5149	54.7902	2.25964e-06	0.0281475
82.663	32.2298	3.37618e-08	0.00275218	79.459	12.0033	1.3156e-07	0.00307941	73.098	4.30006	4.77157e-07	0.00371879	63.8126	1.79057	1.46974e-06	0.00475371	15.4616	5.32943	4.73134e-06	0.0221057	17.9589	0.22484	4.98435e-05	0.0175475	49.3225	55.806	6.56376e-09	0.00101541	6.83248	72.1973	1.38486e-08	0.00264192	-45.1049	50.1918	2.48724e-07	0.00802967	-81.127	58.6996	2.06428e-06	0.0291475
81.6857	35.0109	3.23844e-08	0.00295218	78.6838	12.9716	1.3014e-07	0.00327941	72.6795	4.6167	4.75652e-07	0.00391879	63.7811	1.91103	1.4681e-06	0.00495371	13.3378	5.73023	4.7114e-06	0.0231057	17.536	0.267546	4.98266e-05	0.0185475	48.2847	58.2178	6.20738e-09	0.00104541	5.35188	75.8703	1.20205e-08	0.00272192	-46.5652	53.7613	2.3091e-07	0.00832967	-81.7016	62.7417	1.86227e-06	0.0301475
80.6955	37.8416	3.09806e-08	0.00315218	77.8651	13.9549	1.28693e-07	0.00347941	72.1735	4.93696	4.74121e-07	0.00411879	63.6307	2.03218	1.46643e-06	0.00515371	11.2857	6.14406	4.69081e-06	0.0241057	16.6255	0.309692	4.9809e-05	0.0195475	47.2553	60.6676	5.84503e-09	0.00107541	3.91058	79.6276	1.01499e-08	0.00280192	-47.9498	57.45	2.12499e-07	0.00862967	-82.242	66.9166	1.65362e-06	0.0311475
79.6987	40.7225	2.95503e-08	0.00335218	77.0154	14.9539	1.27219e-07	0.00367941	71.5996	5.26109	4.72563e-07	0.00431879	63.3836	2.1542	1.46474e-06	0.00535371	9.30245	6.57093	4.66956e-06	0.0251057	15.4129	0.351874	4.97908e-05	0.0205475	46.2348	63.1558	5.4767e-09	0.00110541	2.50719	83.4693	8.2367e-09	0.00288192	-49.2645	61.2579	1.9349e-07	0.00892967	-82.7513	71.2243	1.43833e-06	0.0321475
78.6996	43.654	2.80937e-08	0.00355218	76.1436	15.9687	1.25719e-07	0.00387941	70.9727	5.5893	4.70978e-07	0.00451879	63.0573	2.27719	1.46302e-06	0.00555371	7.38539	7.01088	4.64764e-06	0.0261057	14.0105	0.394448	4.97719e-05	0.0215475	45.2238	65.6824	5.10238e-09	0.00113541	1.14035	87.3955	6.28102e-09	0.00296192	-50.5143	65.1852	1.73883e-07	0.00922967	-83.2321	75.6647	1.21639e-06	0.0331475
77.7012	46.6366	2.66106e-08	0.00375218	75.2566	16.9996	1.24193e-07	0.00407941	70.3041	5.92177	4.69368e-07	0.00471879	62.6658	2.40127	1.46127e-06	0.00575371	5.53177	7.46392	4.62507e-06	0.0271057	12.4905	0.437643	4.97523e-05	0.0225475	44.2228	68.2476	4.72209e-09	0.00116541	-0.191246	91.4062	4.28282e-09	0.00304192	-51.704	69.2318	1.53678e-07	0.00952967	-83.6866	80.238	9.87805e-07	0.0341475
76.7059	49.6705	2.51011e-08	0.00395218	74.3595	18.047	1.2264e-07	0.00427941	69.6029	6.25864	4.67731e-07	0.00491879	62.2204	2.52652	1.4595e-06	0.00595371	2.00416	8.40931	4.57794e-06	0.0291057	9.27387	0.526467	4.97112e-05	0.0245475	43.2319	70.8514	4.33582e-09	0.00119541	-1.48885	95.5014	2.2421e-09	0.00312192	-52.8378	73.3978	1.32875e-07	0.00982967	-84.1171	84.9441	7.52579e-07	0.0351475
75.7153	52.7559	2.35652e-08	0.00415218	73.4561	19.1108	1.21061e-07	0.00447941	68.8762	6.6	4.66067e-07	0.00511879	61.7304	2.653	1.4577e-06	0.00615371	-1.30094	9.40718	4.52816e-06	0.0311057	5.99242	0.619138	4.96675e-05	0.0265475	42.2515	73.494	3.94357e-09	0.00122541	-2.75368	99.6813	1.58851e-10	0.00320192	-53.9195	77.6831	1.11474e-07	0.0101297	-84.5254	89.783	5.10709e-07	0.0361475
74.7306	55.8929	2.20029e-08	0.00435218	71.6418	21.2887	1.17824e-07	0.00487941	67.3679	7.29663	4.62661e-07	0.00551879	60.6456	2.90991	1.45402e-06	0.00655371	-4.4025	10.4576	4.47575e-06	0.0331057	2.75738	0.716099	4.96211e-05	0.0285475	41.2818	76.1753	3.54534e-09	0.00125541	-3.9869	103.946	-1.96691e-09	0.00328192	-54.9527	82.0878	8.94747e-08	0.0104297	-84.9131	94.7547	2.62195e-07	0.0371475
73.7527	59.0819	2.04142e-08	0.00455218	69.8308	23.5342	1.14481e-07	0.00527941	65.8127	8.01224	4.59149e-07	0.00591879	59.4577	3.17237	1.45023e-06	0.00695371	-7.31783	11.5606	4.42069e-06	0.0351057	-0.376581	0.817623	4.9572e-05	0.0305475	40.3227	78.8956	3.14113e-09	0.00128541	-5.18964	108.295	-4.1352e-09	0.00336192	-55.9404	86.6119	6.68778e-08	0.0107297	-85.2818	99.8592	7.03717e-09	0.0381475
72.7824	62.3228	1.8799e-08	0.00475218	68.0335	25.8478	1.11032e-07	0.00567941	64.2327	8.74728	4.55531e-07	0.00631879	58.1992	3.44066	1.44634e-06	0.00735371	-10.0626	12.7163	4.363e-06	0.0371057	-3.38379	0.923889	4.95204e-05	0.0325475	39.3745	81.6549	2.73094e-09	0.00131541	-6.36295	112.729	-6.346e-09	0.00344192	-56.8858	91.2555	4.3683e-08	0.0110297	-85.6329	105.097	-2.54764e-07	0.0391475
71.8201	65.6158	1.71574e-08	0.00495218	66.2565	28.2301	1.07477e-07	0.00607941	62.643	9.50206	4.51807e-07	0.00671879	56.8933	3.71501	1.44234e-06	0.00775371	-12.6509	13.9246	4.30266e-06	0.0391057	-6.25406	1.03502	4.9466e-05	0.0345475	38.4371	84.4532	2.31477e-09	0.00134541	-7.50788	117.247	-8.59933e-09	0.00352192	-57.7914	96.0184	1.98902e-08	0.0113297	-85.9675	110.467	-5.2321e-07	0.0401475
70.8661	68.9609	1.54895e-08	0.00515218	64.5041	30.6814	1.03817e-07	0.00647941	61.054	10.2768	4.47978e-07	0.00711879	55.5567	3.99556	1.43824e-06	0.00815371	-15.0954	15.1856	4.23968e-06	0.0411057	-10.3002	1.21102	4.93796e-05	0.0375475	37.5106	87.2906	1.89263e-09	0.00137541	-8.6254	121.851	-1.08952e-08	0.00360192	-58.6596	100.901	-4.50051e-09	0.0116297	-86.2869	115.97	-7.98299e-07	0.0411475
69.9208	72.3583	1.3795e-08	0.00535218	62.7786	33.2019	1.00051e-07	0.00687941	59.4728	11.0718	4.44044e-07	0.00751879	54.2019	4.28245	1.43403e-06	0.00855371	-17.4076	16.4994	4.17405e-06	0.0431057	-14.0466	1.39836	4.92872e-05	0.0405475	36.5948	90.1671	1.4645e-09	0.00140541	-9.71646	126.539	-1.32335e-08	0.00368192	-59.4928	105.903	-2.94892e-08	0.0119297	-86.592	121.606	-1.08003e-06	0.0421475
68.9842	75.808	1.20742e-08	0.00555218	61.0818	35.7918	9.61798e-08	0.00727941	57.9047	11.8871	4.40003e-07	0.00791879	52.8381	4.57579	1.42972e-06	0.00895371	-19.5978	17.8659	4.10579e-06	0.0451057	-17.5141	1.59717	4.91889e-05	0.0435475	35.6899	93.0828	1.03039e-09	0.00143541	-10.782	131.312	-1.56144e-08	0.00376192	-60.2931	111.024	-5.50758e-08	0.0122297	-86.8838	127.374	-1.36841e-06	0.0431475
68.0566	79.3101	1.0327e-08	0.00575218	59.4144	38.4514	9.22026e-08	0.00767941	56.3531	12.7228	4.35857e-07	0.00831879	51.472	4.87566	1.4253e-06	0.00935371	-21.6753	19.2851	4.03488e-06	0.0471057	-20.726	1.80755	4.90847e-05	0.0465475	34.7956	96.0378	5.90306e-10	0.00146541	-11.8228	136.169	-1.80378e-08	0.00384192	-61.0623	116.265	-8.12604e-08	0.0125297	-87.1631	133.276	-1.66343e-06	0.0441475
67.138	82.8646	8.55332e-09	0.00595218	57.7768	41.1807	8.81197e-08	0.00807941	54.8206	13.5791	4.31605e-07	0.00871879	50.1091	5.18212	1.42077e-06	0.00975371	-23.6484	20.7571	3.96133e-06	0.0491057	-23.7059	2.02957	4.89745e-05	0.0495475	33.9119	99.032	1.4424e-10	0.00149541	-12.8398	141.112	-2.05038e-08	0.00392192	-61.8022	121.625	-1.08043e-07	0.0128297	-87.4308	139.31	-1.96509e-06	0.0451475
66.2283	86.4716	6.75324e-09	0.00615218	56.169	43.9798	8.39312e-08	0.00847941	53.309	14.456	4.27248e-07	0.00911879	48.7532	5.49524	1.41614e-06	0.0101537	-27.3115	23.8593	3.80631e-06	0.0531057	-27.3556	2.34378	4.88183e-05	0.0535475	33.0388	102.065	-3.07805e-10	0.00152541	-13.8337	146.139	-2.30122e-08	0.00400192	-62.5145	127.105	-1.35423e-07	0.0131297	-87.6875	145.478	-2.2734e-06	0.0461475
65.3277	90.131	4.92675e-09	0.00635218	54.591	46.8488	7.9637e-08	0.00887941	51.8193	15.3536	4.22785e-07	0.00951879	47.4073	5.81505	1.41141e-06	0.0105537	-30.6397	27.1727	3.64073e-06	0.0571057	-30.6777	2.67885	4.86515e-05	0.0575475	32.1762	105.138	-7.65829e-10	0.00155541	-14.8053	151.251	-2.55632e-08	0.00408192	-63.2007	132.704	-1.63402e-07	0.0134297	-87.9338	151.778	-2.58836e-06	0.0471475
64.4361	93.8429	3.07384e-09	0.00655218	53.0423	49.7878	7.52371e-08	0.00927941	50.3524	16.2719	4.18216e-07	0.00991879	46.0738	6.14161	1.40657e-06	0.0109537	-33.6769	30.6972	3.46457e-06	0.0611057	-33.7128	3.03483	4.84742e-05	0.0615475	31.3238	108.251	-1.22983e-09	0.00158541	-15.7553	156.448	-2.81567e-08	0.00416192	-63.8621	138.423	-1.91978e-07	0.0137297	-88.1705	158.211	-2.90995e-06	0.0481475
63.5534	97.6074	1.19451e-09	0.00675218	51.5226	52.7968	7.07316e-08	0.00967941	48.9087	17.211	4.13541e-07	0.0103188	44.7543	6.47495	1.40162e-06	0.0113537	-36.4595	34.4329	3.27785e-06	0.0651057	-36.4952	3.41177	4.82863e-05	0.0655475	30.4817	111.402	-1.69982e-09	0.00161541	-16.9136	163.063	-3.14583e-08	0.00426192	-64.5002	144.262	-2.21152e-07	0.0140297	-88.3981	164.776	-3.23819e-06	0.0491475
62.6796	101.425	-7.11237e-10	0.00695218	50.0313	55.876	6.61204e-08	0.0100794	47.4884	18.171	4.08761e-07	0.0107188	43.45	6.81508	1.39656e-06	0.0117537	-39.0181	38.3799	3.08056e-06	0.0691057	-39.0547	3.80971	4.80878e-05	0.0695475	29.6496	114.593	-2.17578e-09	0.00164541	-18.0406	169.811	-3.48264e-08	0.00436192	-65.1161	150.22	-2.50925e-07	0.0143297	-88.6171	171.475	-3.57308e-06	0.0501475
61.8146	105.294	-2.6434e-09	0.00715218	48.5678	59.0252	6.14035e-08	0.0104794	46.0916	19.1518	4.03876e-07	0.0111188	42.1621	7.16205	1.3914e-06	0.0121537	-41.3787	42.5381	2.8727e-06	0.0731057	-41.4165	4.22866	4.78788e-05	0.0735475	28.8275	117.824	-2.65772e-09	0.00167541	-19.1376	176.692	-3.8261e-08	0.00446192	-65.711	156.297	-2.81295e-07	0.0146297	-88.6235	171.678	-3.58322e-06	0.0501775
60.9583	109.216	-4.60198e-09	0.00735218	47.1316	62.2447	5.6581e-08	0.0108794	44.7181	20.1536	3.98884e-07	0.0115188	40.8911	7.51587	1.38614e-06	0.0125537	-43.5634	46.9075	2.65428e-06	0.0771057	-45.6314	5.12969	4.74291e-05	0.0815475	28.0152	121.094	-3.14564e-09	0.00170541	-20.2056	183.706	-4.1762e-08	0.00456192	-66.2859	162.494	-3.12263e-07	0.0149297	-88.63	171.881	-3.59338e-06	0.0502075
60.1107	113.191	-6.58698e-09	0.00755218	45.7221	65.5343	5.16527e-08	0.0112794	43.3678	21.1762	3.93787e-07	0.0119188	39.6375	7.87655	1.38077e-06	0.0129537	-45.5911	51.4882	2.42529e-06	0.0811057	-49.2809	6.11498	4.69371e-05	0.0895475	27.2126	124.403	-3.63955e-09	0.00173541	-21.2459	190.852	-4.53294e-08	0.00466192	-66.8418	168.81	-3.43829e-07	0.0152297	-88.6364	172.084	-3.60354e-06	0.0502375
59.2717	117.219	-8.5984e-09	0.00775218	44.3386	68.8941	4.66188e-08	0.0116794	42.0405	22.2198	3.88584e-07	0.0123188	38.4017	8.24413	1.37529e-06	0.0133537	-47.4782	56.2802	2.18573e-06	0.0851057	-52.4711	7.1846	4.64028e-05	0.0975475	26.4196	127.752	-4.13943e-09	0.00176541	-22.2594	198.13	-4.89632e-08	0.00476192	-67.3797	175.246	-3.75993e-07	0.0155297	-88.6428	172.288	-3.61371e-06	0.0502675
58.4412	121.299	-1.06362e-08	0.00795218	42.9805	72.3242	4.14793e-08	0.0120794	40.7358	23.2843	3.83276e-07	0.0127188	37.1838	8.6186	1.36971e-06	0.0137537	-49.2388	61.2835	1.93561e-06	0.0891057	-55.2835	8.33859	4.58262e-05	0.105547	25.636	131.141	-4.64529e-09	0.00179541	-23.2473	205.542	-5.26635e-08	0.00486192	-67.9004	181.802	-4.08755e-07	0.0158297	-88.6492	172.491	-3.62388e-06	0.0502975
57.619	125.432	-1.27005e-08	0.00815218	41.6473	75.8246	3.62341e-08	0.0124794	39.4533	24.3698	3.77862e-07	0.0131188	35.9838	8.99998	1.36402e-06	0.0141537	-50.8851	66.4981	1.67492e-06	0.0931057	-57.7813	9.577	4.52074e-05	0.113547	24.8616	134.569	-5.15713e-09	0.00182541	-24.2104	213.086	-5.64302e-08	0.00496192	-68.0702	184.013	-4.19809e-07	0.0159297	-88.6556	172.695	-3.63406e-06	0.0503275
56.8051	129.618	-1.47911e-08	0.00835218	40.3383	79.3952	3.08832e-08	0.0128794	38.1927	25.4763	3.72342e-07	0.0135188	34.8019	9.38829	1.35823e-06	0.0145537	-52.4281	71.9239	1.40366e-06	0.0971057	-60.0146	10.8998	4.45463e-05	0.121547	24.0965	138.036	-5.67495e-09	0.00185541	-25.1496	220.762	-6.02634e-08	0.00506192	-68.2383	186.238	-4.30929e-07	0.0160297	-88.662	172.899	-3.64425e-06	0.0503575
55.9994	133.856	-1.69082e-08	0.00855218	39.0529	83.0362	2.54266e-08	0.0132794	36.9536	26.6039	3.66716e-07	0.0139188	33.6378	9.78354	1.35233e-06	0.0149537	-53.877	77.5611	1.12183e-06	0.101106	-62.0232	12.3071	4.3843e-05	0.129547	23.3403	141.543	-6.19874e-09	0.00188541	-26.0659	228.572	-6.4163e-08	0.00516192	-68.4047	188.477	-4.42115e-07	0.0161297	-88.6684	173.103	-3.65444e-06	0.0503875
55.2017	138.147	-1.90517e-08	0.00875218	37.7905	86.7474	1.98644e-08	0.0136794	35.7356	27.7524	3.60985e-07	0.0143188	32.4915	10.1857	1.34633e-06	0.0153537	-55.2403	83.4096	8.29442e-07	0.105106	-63.8394	13.7989	4.30973e-05	0.137547	22.593	145.09	-6.72852e-09	0.00191541	-26.9601	236.514	-6.81291e-08	0.00526192	-68.5692	190.728	-4.53368e-07	0.0162297	-88.6748	173.306	-3.66463e-06	0.0504175
54.4121	142.491	-2.12217e-08	0.00895218	36.5506	90.529	1.41965e-08	0.0140794	34.5382	28.9219	3.55148e-07	0.0147188	31.3628	10.5949	1.34022e-06	0.0157537	-56.5253	89.4694	5.26483e-07	0.109106	-65.4897	15.3752	4.23094e-05	0.145547	21.8545	148.676	-7.26428e-09	0.00194541	-27.8329	244.589	-7.21615e-08	0.00536192	-68.7321	192.993	-4.64687e-07	0.0163297	-88.6812	173.511	-3.67484e-06	0.0504475
53.6302	146.887	-2.3418e-08	0.00915218	35.3325	94.3809	8.42288e-09	0.0144794	32.2036	31.3241	3.43158e-07	0.0155188	29.1574	11.434	1.32768e-06	0.0165537	-57.7385	95.7405	2.12957e-07	0.113106	-66.9957	17.0359	4.14793e-05	0.153547	21.1245	152.302	-7.80602e-09	0.00197541	-28.6852	252.797	-7.62605e-08	0.00546192	-68.8933	195.271	-4.76073e-07	0.0164297	-88.6875	173.715	-3.68505e-06	0.0504775
52.8562	151.336	-2.56408e-08	0.00935218	34.1358	98.3031	2.54364e-09	0.0148794	29.9465	33.8105	3.30744e-07	0.0163188	27.0197	12.3011	1.31472e-06	0.0173537	-58.8859	102.223	-1.11136e-07	0.117106	-68.3757	18.7812	4.06069e-05	0.161547	18.7519	164.675	-9.65499e-09	0.00207541	-29.5175	261.137	-8.04258e-08	0.00556192	-69.0529	197.563	-4.87525e-07	0.0165297	-88.7087	174.396	-3.71912e-06	0.0505775
52.0898	155.838	-2.78899e-08	0.00955218	32.9599	102.296	-3.44128e-09	0.0152794	27.7634	36.3811	3.17908e-07	0.0171188	24.9475	13.196	1.30134e-06	0.0181537	-59.9726	108.917	-4.45796e-07	0.121106	-69.9463	21.0816	3.94569e-05	0.171547	16.4686	177.489	-1.15704e-08	0.00217541	-30.3307	269.611	-8.46576e-08	0.00566192	-69.2108	199.867	-4.99044e-07	0.0166297	-88.7298	175.079	-3.75326e-06	0.0506775
51.3309	160.393	-3.01655e-08	0.00975218	31.8042	106.359	-9.53186e-09	0.0156794	25.6511	39.036	3.0465e-07	0.0179188	22.9387	14.1189	1.28753e-06	0.0189537	-61.0033	115.822	-7.91023e-07	0.125106	-71.3681	23.514	3.82409e-05	0.181547	14.2701	190.743	-1.35523e-08	0.00227541	-31.1253	278.217	-8.89558e-08	0.00576192	-69.3671	202.185	-5.10629e-07	0.0167297	-88.7508	175.763	-3.78746e-06	0.0507775
50.5795	165	-3.24675e-08	0.00995218	30.6684	110.492	-1.57281e-08	0.0160794	23.6065	41.7752	2.90968e-07	0.0187188	20.9908	15.0698	1.2733e-06	0.0197537	-61.9823	122.938	-1.14682e-06	0.129106	-72.6614	26.0785	3.69588e-05	0.191547	12.1521	204.438	-1.56005e-08	0.00237541	-31.902	286.955	-9.33205e-08	0.00586192	-69.5218	204.517	-5.2228e-07	0.0168297	-88.7718	176.449	-3.82174e-06	0.0508775
49.8354	169.66	-3.47959e-08	0.0101522	29.5518	114.696	-2.203e-08	0.0164794	21.6265	44.5987	2.76864e-07	0.0195188	19.1016	16.0488	1.25865e-06	0.0205537	-62.9134	130.266	-1.51318e-06	0.133106	-73.8428	28.775	3.56107e-05	0.201547	10.1103	218.575	-1.77153e-08	0.00247541	-32.6614	295.827	-9.77516e-08	0.00596192	-69.675	206.861	-5.33998e-07	0.0169297	-88.7926	177.136	-3.85608e-06	0.0509775
49.0986	174.373	-3.71508e-08	0.0103522	28.4541	118.97	-2.84376e-08	0.0168794	19.7082	47.5066	2.62338e-07	0.0203188	17.2688	17.0557	1.24358e-06	0.0213537	-63.7999	137.805	-1.89011e-06	0.137106	-74.9262	31.6036	3.41966e-05	0.211547	8.14087	233.154	-1.98964e-08	0.00257541	-33.4041	304.831	-1.02249e-07	0.00606192	-69.8266	209.219	-5.45782e-07	0.0170297	-88.8134	177.824	-3.89048e-06	0.0510775
48.369	179.139	-3.9532e-08	0.0105522	27.3747	123.314	-3.49509e-08	0.0172794	17.8489	50.4989	2.47388e-07	0.0211188	15.4901	18.0907	1.22808e-06	0.0221537	-64.645	145.555	-2.2776e-06	0.141106	-75.9234	34.5643	3.27164e-05	0.221547	6.24018	248.174	-2.21441e-08	0.00267541	-34.1305	313.968	-1.06813e-07	0.00616192	-69.9768	211.59	-5.57633e-07	0.0171297	-88.8341	178.514	-3.92495e-06	0.0511775
47.6463	183.957	-4.19397e-08	0.0107522	26.3132	127.729	-4.15698e-08	0.0176794	16.046	53.5756	2.32016e-07	0.0219188	13.7634	19.1537	1.21216e-06	0.0229537	-65.4515	153.517	-2.67566e-06	0.145106	-76.8443	37.657	3.11701e-05	0.231547	4.40476	263.636	-2.44581e-08	0.00277541	-34.8413	323.238	-1.11444e-07	0.00626192	-70.1254	213.975	-5.6955e-07	0.0172297	-88.8548	179.204	-3.95949e-06	0.0512775
46.9307	188.829	-4.43738e-08	0.0109522	25.2692	132.214	-4.82944e-08	0.0180794	14.2971	56.7367	2.16221e-07	0.0227188	12.0867	20.2448	1.19582e-06	0.0237537	-66.2221	161.69	-3.08429e-06	0.149106	-77.6973	40.8818	2.95579e-05	0.241547	2.63138	279.54	-2.68386e-08	0.00287541	-35.5369	332.641	-1.1614e-07	0.00636192	-70.2726	216.372	-5.81534e-07	0.0173297	-88.8753	179.897	-3.99409e-06	0.0513775
40.1362	240.444	-7.01677e-08	0.0129522	24.2423	136.77	-5.51247e-08	0.0184794	12.5999	59.9822	2.00004e-07	0.0235188	10.4578	21.364	1.17906e-06	0.0245537	-66.3721	163.35	-3.16728e-06	0.149906	-78.4896	44.2387	2.78795e-05	0.251547	0.916997	295.886	-2.92855e-08	0.00297541	-36.2179	342.176	-1.20904e-07	0.00646192	-70.4183	218.783	-5.93584e-07	0.0174297	-88.8958	180.59	-4.02877e-06	0.0514775
33.9406	297.339	-9.86034e-08	0.0149522	23.232	141.396	-6.20606e-08	0.0188794	10.952	63.3121	1.83364e-07	0.0243188	8.87499	22.5112	1.16187e-06	0.0253537	-66.5208	165.018	-3.2507e-06	0.150706	-79.2276	47.7276	2.61352e-05	0.261547	-0.741243	312.675	-3.17989e-08	0.00307541	-36.8845	351.844	-1.25734e-07	0.00656192	-70.5626	221.208	-6.05701e-07	0.0175297	-88.9162	181.285	-4.0635e-06	0.0515775
28.269	359.514	-1.29681e-07	0.0169522	22.238	146.092	-6.91023e-08	0.0192794	9.35145	66.7265	1.66301e-07	0.0251188	7.3363	23.6866	1.14426e-06	0.0261537	-66.6682	166.695	-3.33454e-06	0.151506	-79.9165	51.3487	2.43248e-05	0.271547	-2.34602	329.905	-3.43787e-08	0.00317541	-37.5374	361.645	-1.3063e-07	0.00666192	-70.7055	223.645	-6.17884e-07	0.0176297	-88.9365	181.981	-4.09831e-06	0.0516775
23.0578	426.972	-1.634e-07	0.0189522	21.2598	150.859	-7.62495e-08	0.0196794	7.79625	70.2254	1.48816e-07	0.0259188	5.84001	24.8901	1.12623e-06	0.0269537	-66.8142	168.381	-3.4188e-06	0.152306	-80.5612	55.1018	2.24483e-05	0.281547	-3.89985	347.578	-3.70249e-08	0.00327541	-38.177	371.579	-1.35592e-07	0.00676192	-70.847	226.096	-6.30133e-07	0.0177297	-88.9568	182.679	-4.13318e-06	0.0517775
18.2535	499.712	-1.99761e-07	0.0209522	20.2971	155.696	-8.35025e-08	0.0200794	6.28451	73.8087	1.30908e-07	0.0267188	4.38447	26.1217	1.10777e-06	0.0277537	-66.959	170.074	-3.50349e-06	0.153106	-81.1658	58.9869	2.05058e-05	0.291547	-5.4051	365.693	-3.97376e-08	0.00337541	-38.8035	381.646	-1.40621e-07	0.00686192	-70.9872	228.56	-6.42449e-07	0.0178297	-88.977	183.377	-4.16811e-06	0.0518775
13.8102	577.735	-2.38763e-07	0.0229522	19.3495	160.604	-9.08611e-08	0.0204794	4.81446	77.4765	1.12577e-07	0.0275188	2.96807	27.3814	1.0889e-06	0.0285537	-67.1026	171.777	-3.58859e-06	0.153906	-81.7339	63.0042	1.84973e-05	0.301547	-6.864	384.251	-4.25167e-08	0.00347541	-39.4175	391.845	-1.45717e-07	0.00696192	-71.126	231.037	-6.54831e-07	0.0179297	-88.9971	184.078	-4.20312e-06	0.0519775
9.68865	661.04	-2.80408e-07	0.0249522	18.4167	165.582	-9.83254e-08	0.0208794	3.38441	81.2287	9.38232e-08	0.0283188	1.58929	28.6692	1.0696e-06	0.0293537	-67.2449	173.487	-3.67412e-06	0.154706	-82.2687	67.1535	1.64227e-05	0.311547	-8.27864	403.251	-4.53622e-08	0.00357541	-40.0193	402.178	-1.50879e-07	0.00706192	-71.2635	233.528	-6.6728e-07	0.0180297	-89.0171	184.779	-4.23819e-06	0.0520775
5.85524	749.628	-3.24694e-07	0.0269522	17.4984	170.63	-1.05895e-07	0.0212794	1.99276	85.0655	7.4647e-08	0.0291188	0.246702	29.9852	1.04987e-06	0.0301537	-67.386	175.206	-3.76008e-06	0.155506	-82.7731	71.435	1.42821e-05	0.321547	-9.651	422.693	-4.82742e-08	0.00367541	-40.6093	412.643	-1.56107e-07	0.00716192	-71.3997	236.032	-6.79795e-07	0.0181297	-89.0371	185.482	-4.27332e-06	0.0521775
2.28074	843.5	-3.71622e-07	0.0289522	16.5942	175.749	-1.13571e-07	0.0216794	0.638004	88.9867	5.50482e-08	0.0299188	-1.06108	31.3293	1.02973e-06	0.0309537	-67.5258	176.934	-3.84645e-06	0.156306	-83.2495	75.8485	1.20754e-05	0.331547	-10.9829	442.578	-5.12527e-08	0.00377541	-41.1877	423.241	-1.61402e-07	0.00726192	-71.5346	238.549	-6.92377e-07	0.0182297	-89.0569	186.186	-4.30853e-06	0.0522775
-1.06021	942.655	-4.21191e-07	0.0309522	15.7037	180.938	-1.21352e-07	0.0220794	-0.681303	92.9924	3.50267e-08	0.0307188	-2.33537	32.7015	1.00916e-06	0.0317537	-67.6645	178.67	-3.93325e-06	0.157106	-83.7004	80.3941	9.80269e-06	0.341547	-12.2762	462.906	-5.42975e-08	0.00387541	-41.755	433.971	-1.66763e-07	0.00736192	-71.6682	241.08	-7.05025e-07	0.0183297	-89.0768	186.892	-4.34379e-06	0.0523775
-4.18979	1047.09	-4.73403e-07	0.0329522	14.8267	186.198	-1.29239e-07	0.0224794	-1.96652	97.0826	1.45824e-08	0.0315188	-3.57742	34.1018	9.88168e-07	0.0325537	-67.802	180.414	-4.02047e-06	0.157906	-84.1275	85.0717	7.46393e-06	0.351547	-13.5324	483.676	-5.74088e-08	0.00397541	-42.3115	444.835	-1.72191e-07	0.00746192	-71.8006	243.624	-7.17739e-07	0.0184297	-89.0965	187.598	-4.37913e-06	0.0524775
-7.12743	1156.81	-5.28256e-07	0.0349522	13.9629	191.528	-1.37232e-07	0.0228794	-3.21896	101.257	-6.28445e-09	0.0323188	-4.78841	35.5303	9.66754e-07	0.0333537	-67.9383	182.167	-4.10811e-06	0.158706	-84.5329	89.8815	5.05913e-06	0.361547	-14.7532	504.888	-6.05866e-08	0.00407541	-42.8574	455.831	-1.77685e-07	0.00756192	-71.9317	246.181	-7.3052e-07	0.0185297	-89.1162	188.306	-4.41453e-06	0.0525775
-9.89027	1271.82	-5.85751e-07	0.0369522	13.112	196.928	-1.4533e-07	0.0232794	-4.43984	105.516	-2.7574e-08	0.0331188	-5.96949	36.987	9.44918e-07	0.0341537	-68.0735	183.929	-4.19618e-06	0.159506	-84.918	94.8233	2.58829e-06	0.371547	-15.94	526.544	-6.38308e-08	0.00417541	-43.3931	466.961	-1.83246e-07	0.00766192	-72.0617	248.751	-7.43368e-07	0.0186297	-89.1358	189.016	-4.45e-06	0.0526775
-12.4935	1392.11	-6.45887e-07	0.0389522	12.2737	202.399	-1.53534e-07	0.0236794	-5.63034	109.86	-4.92863e-08	0.0339188	-7.12173	38.4718	9.22659e-07	0.0349537	-68.2076	185.699	-4.28467e-06	0.160306	-85.2844	99.8972	5.1398e-08	0.381547	-17.0942	548.642	-6.71414e-08	0.00427541	-43.9188	478.223	-1.88873e-07	0.00776192	-72.1904	251.335	-7.56282e-07	0.0187297	-89.1553	189.727	-4.48553e-06	0.0527775
-14.9505	1517.68	-7.08666e-07	0.0409522	11.4477	207.941	-1.61844e-07	0.0240794	-6.79157	114.288	-7.14212e-08	0.0347188	-8.24617	39.9847	8.99977e-07	0.0357537	-68.3405	187.477	-4.37358e-06	0.161106	-85.6335	105.103	-2.55153e-06	0.391547	-18.2172	571.182	-7.05184e-08	0.00437541	-44.4349	489.618	-1.94566e-07	0.00786192	-72.318	253.932	-7.69262e-07	0.0188297	-89.1748	190.439	-4.52114e-06	0.0528775
-17.2732	1648.53	-7.74086e-07	0.0429522	10.6338	213.552	-1.70259e-07	0.0244794	-7.36155	116.534	-8.26472e-08	0.0351188	-9.34379	41.5258	8.76873e-07	0.0365537	-68.4723	189.264	-4.46291e-06	0.161906	-85.9664	110.441	-5.22051e-06	0.401547	-19.3101	594.165	-7.39619e-08	0.00447541	-44.9415	501.145	-2.00326e-07	0.00796192	-72.4444	256.542	-7.82309e-07	0.0189297	-89.1942	191.152	-4.5568e-06	0.0529775
-19.4725	1784.67	-8.42147e-07	0.0449522	6.73599	242.668	-2.13921e-07	0.0264794	-10.1101	128.08	-1.40362e-07	0.0371188	-10.4155	43.095	8.53346e-07	0.0373537	-68.603	191.059	-4.55267e-06	0.162706	-86.2841	115.911	-7.95553e-06	0.411547	-20.3742	617.591	-7.74719e-08	0.00457541	-45.439	512.806	-2.06152e-07	0.00806192	-72.5696	259.165	-7.95422e-07	0.0190297	-89.2135	191.867	-4.59254e-06	0.0530775
-21.5578	1926.09	-9.12851e-07	0.0469522	3.10334	273.544	-2.60224e-07	0.0284794	-12.7003	140.154	-2.00719e-07	0.0391188	-11.4623	44.6924	8.29396e-07	0.0381537	-68.7327	192.863	-4.64285e-06	0.163506	-86.5878	121.514	-1.07566e-05	0.421547	-21.4106	641.46	-8.10483e-08	0.00467541	-45.9276	524.599	-2.12045e-07	0.00816192	-72.6937	261.802	-8.08601e-07	0.0191297	-89.2327	192.583	-4.62834e-06	0.0531775
-22.5605	1998.78	-9.49193e-07	0.0479522	1.37815	289.642	-2.84367e-07	0.0294794	-13.9402	146.389	-2.31888e-07	0.0401188	-12.4849	46.318	8.05024e-07	0.0389537	-68.8612	194.675	-4.73345e-06	0.164306	-86.8784	127.248	-1.36237e-05	0.431547	-22.4204	665.771	-8.46911e-08	0.00477541	-46.4075	536.525	-2.18004e-07	0.00826192	-72.8167	264.452	-8.21847e-07	0.0192297	-89.2519	193.301	-4.6642e-06	0.0532775
-23.5379	2072.79	-9.86196e-07	0.0489522	-0.290282	306.18	-3.09169e-07	0.0304794	-15.1455	152.756	-2.63717e-07	0.0411188	-13.4843	47.9717	7.80228e-07	0.0397537	-68.9888	196.495	-4.82447e-06	0.165106	-87.1566	133.114	-1.65568e-05	0.441547	-23.4045	690.526	-8.84003e-08	0.00487541	-46.879	548.585	-2.2403e-07	0.00836192	-72.9386	267.116	-8.3516e-07	0.0193297	-89.271	194.019	-4.70014e-06	0.0533775
-24.4909	2148.13	-1.02386e-06	0.0499522	-1.9047	323.159	-3.34633e-07	0.0314794	-16.3175	159.255	-2.96207e-07	0.0421188	-14.4611	49.6535	7.55011e-07	0.0405537	-69.1152	198.324	-4.91592e-06	0.165906	-87.4233	139.113	-1.9556e-05	0.451547	-24.364	715.722	-9.2176e-08	0.00497541	-47.3422	560.776	-2.30122e-07	0.00846192	-73.0594	269.792	-8.48539e-07	0.0194297	-89.2901	194.739	-4.73614e-06	0.0534775
-25.4205	2224.78	-1.06218e-06	0.0509522	-3.46769	340.578	-3.60756e-07	0.0324794	-17.4575	165.887	-3.29357e-07	0.0431188	-15.4161	51.3635	7.2937e-07	0.0413537	-69.2407	200.162	-5.00779e-06	0.166706	-87.6791	145.244	-2.26213e-05	0.461547	-25.2998	741.362	-9.60182e-08	0.00507541	-47.7974	573.101	-2.3628e-07	0.00856192	-73.1791	272.482	-8.61984e-07	0.0195297	-89.309	195.461	-4.7722e-06	0.0535775
-26.3274	2302.76	-1.10117e-06	0.0519522	-4.98166	358.437	-3.8754e-07	0.0334794	-18.5669	172.65	-3.63168e-07	0.0441188	-16.3501	53.1017	7.03307e-07	0.0421537	-69.3651	202.008	-5.10008e-06	0.167506	-87.9247	151.506	-2.57526e-05	0.471547	-26.2126	767.444	-9.99267e-08	0.00517541	-48.2448	585.559	-2.42505e-07	0.00866192	-73.2977	275.186	-8.75496e-07	0.0196297	-89.328	196.184	-4.80834e-06	0.0536775
-27.2125	2382.05	-1.14081e-06	0.0529522	-6.44888	376.737	-4.14985e-07	0.0344794	-19.6469	179.545	-3.97639e-07	0.0451188	-17.2637	54.8681	6.76821e-07	0.0429537	-69.4886	203.862	-5.1928e-06	0.168306	-88.1607	157.901	-2.89499e-05	0.481547	-27.1034	793.969	-1.03902e-07	0.00527541	-48.6846	598.149	-2.48797e-07	0.00876192	-73.4153	277.902	-8.89074e-07	0.0197297	-89.3468	196.908	-4.84454e-06	0.0537775
-28.0767	2462.67	-1.18112e-06	0.0539522	-7.87149	395.476	-4.4309e-07	0.0354794	-20.6987	186.573	-4.32771e-07	0.0461188	-18.1576	56.6626	6.49913e-07	0.0437537	-69.611	205.725	-5.28594e-06	0.169106	-88.3877	164.428	-3.22132e-05	0.491547	-27.973	820.937	-1.07943e-07	0.00537541	-49.117	610.872	-2.55155e-07	0.00886192	-73.5319	280.632	-9.02719e-07	0.0198297	-89.3656	197.633	-4.8808e-06	0.0538775
-28.9205	2544.61	-1.22208e-06	0.0549522	-9.25148	414.656	-4.71855e-07	0.0364794	-21.7232	193.732	-4.68563e-07	0.0471188	-19.0324	58.4852	6.22581e-07	0.0445537	-69.7325	207.596	-5.3795e-06	0.169906	-88.6061	171.087	-3.55427e-05	0.501547	-28.8221	848.348	-1.12051e-07	0.00547541	-49.5422	623.729	-2.61579e-07	0.00896192	-73.6475	283.375	-9.1643e-07	0.0199297	-89.3843	198.36	-4.91713e-06	0.0539775
-29.7448	2627.87	-1.26371e-06	0.0559522	-10.5908	434.276	-5.01281e-07	0.0374794	-22.7217	201.024	-5.05015e-07	0.0481188	-19.8888	60.3361	5.94828e-07	0.0453537	-69.853	209.476	-5.47348e-06	0.170706	-88.6232	171.625	-3.58119e-05	0.502347	-29.6513	876.201	-1.16225e-07	0.00557541	-49.9603	636.718	-2.6807e-07	0.00906192	-73.762	286.131	-9.30207e-07	0.0200297	-89.4029	199.088	-4.95353e-06	0.0540775
-30.5501	2712.45	-1.30599e-06	0.0569522	-11.8911	454.337	-5.31367e-07	0.0384794	-23.695	208.448	-5.42128e-07	0.0491188	-20.7272	62.2151	5.66651e-07	0.0461537	-69.9725	211.364	-5.56789e-06	0.171506	-88.6403	172.164	-3.60815e-05	0.503147	-30.4615	904.498	-1.20466e-07	0.00567541	-50.3715	649.839	-2.74627e-07	0.00916192	-73.8756	288.901	-9.44051e-07	0.0201297	-89.4215	199.817	-4.99e-06	0.0541775
-31.3373	2798.35	-1.34894e-06	0.0579522	-13.1541	474.837	-5.62114e-07	0.0394794	-24.6441	216.003	-5.79901e-07	0.0501188	-21.5483	64.1222	5.38052e-07	0.0469537	-70.0911	213.261	-5.66272e-06	0.172306	-88.6573	172.705	-3.63515e-05	0.503947	-31.2532	933.237	-1.24773e-07	0.00577541	-50.7761	663.094	-2.8125e-07	0.00926192	-73.9882	291.684	-9.57961e-07	0.0202297	-89.44	200.548	-5.02653e-06	0.0542775
-32.1067	2885.57	-1.39255e-06	0.0589522	-14.3814	495.778	-5.93521e-07	0.0404794	-25.5698	223.691	-6.18335e-07	0.0511188	-22.3525	66.0576	5.0903e-07	0.0477537	-70.2088	215.166	-5.75797e-06	0.173106	-88.6743	173.245	-3.6622e-05	0.504747	-32.0271	962.419	-1.29147e-07	0.00587541	-51.1741	676.482	-2.8794e-07	0.00936192	-74.0998	294.48	-9.71938e-07	0.0203297	-89.4585	201.28	-5.06313e-06	0.0543775
-32.8592	2974.11	-1.43682e-06	0.0599522	-15.5746	517.16	-6.25589e-07	0.0414794	-26.4731	231.511	-6.57429e-07	0.0521188	-23.1405	68.0211	4.79585e-07	0.0485537	-70.3255	217.08	-5.85364e-06	0.173906	-88.6912	173.787	-3.68929e-05	0.505547	-32.7837	992.043	-1.33587e-07	0.00597541	-51.5657	690.002	-2.94697e-07	0.00946192	-74.2104	297.29	-9.85982e-07	0.0204297	-89.4769	202.013	-5.09979e-06	0.0544775
-33.5951	3063.97	-1.48174e-06	0.0609522	-16.7349	538.981	-6.58317e-07	0.0424794	-27.3548	239.463	-6.97184e-07	0.0531188	-23.9126	70.0127	4.49718e-07	0.0493537	-70.4414	219.002	-5.94974e-06	0.174706	-88.7081	174.33	-3.71642e-05	0.506347	-33.5237	1022.11	-1.38094e-07	0.00607541	-51.9511	703.655	-3.0152e-07	0.00956192	-74.3202	300.112	-1.00009e-06	0.0205297	-89.4952	202.748	-5.13652e-06	0.0545775
-34.315	3155.16	-1.52733e-06	0.0619522	-17.8638	561.243	-6.91705e-07	0.0434794	-28.2155	247.547	-7.37599e-07	0.0541188	-24.6694	72.0325	4.19428e-07	0.0501537	-70.5563	220.932	-6.04626e-06	0.175506	-88.7249	174.873	-3.7436e-05	0.507147	-34.2475	1052.62	-1.42667e-07	0.00617541	-52.3303	717.441	-3.08409e-07	0.00966192	-74.4289	302.948	-1.01427e-06	0.0206297	-89.5135	203.484	-5.17332e-06	0.0546775
-35.0196	3247.66	-1.57358e-06	0.0629522	-18.9625	583.945	-7.25754e-07	0.0444794	-29.0561	255.763	-7.78675e-07	0.0551188	-25.4113	74.0805	3.88715e-07	0.0509537	-70.6704	222.871	-6.1432e-06	0.176306	-88.7416	175.418	-3.77081e-05	0.507947	-34.9558	1083.57	-1.47306e-07	0.00627541	-52.7037	731.36	-3.15365e-07	0.00976192	-74.5368	305.798	-1.02851e-06	0.0207297	-89.5316	204.221	-5.21018e-06	0.0547775
-35.7091	3341.49	-1.62049e-06	0.0639522	-20.0321	607.087	-7.60463e-07	0.0454794	-29.8773	264.111	-8.20411e-07	0.0561188	-26.1387	76.1567	3.5758e-07	0.0517537	-70.7835	224.818	-6.24057e-06	0.177106	-88.7583	175.963	-3.79807e-05	0.508747	-35.6489	1114.97	-1.52012e-07	0.00637541	-53.0712	745.412	-3.22387e-07	0.00986192	-74.6438	308.66	-1.04282e-06	0.0208297	-89.5498	204.96	-5.24711e-06	0.0548775
-35.9131	3369.89	-1.63469e-06	0.0642522	-20.3475	614.115	-7.71005e-07	0.0457794	-30.1199	266.642	-8.3306e-07	0.0564188	-26.8521	78.2611	3.26022e-07	0.0525537	-70.8958	226.774	-6.33835e-06	0.177906	-88.775	176.509	-3.82537e-05	0.509547	-36.3275	1146.81	-1.56784e-07	0.00647541	-53.4331	759.596	-3.29476e-07	0.00996192	-74.7498	311.536	-1.05719e-06	0.0209297	-89.5678	205.7	-5.28411e-06	0.0549775
-36.1159	3398.42	-1.64895e-06	0.0645522	-20.6605	621.184	-7.81606e-07	0.0460794	-30.3609	269.184	-8.45769e-07	0.0567188	-27.5518	80.3936	2.94042e-07	0.0533537	-71.0072	228.738	-6.43656e-06	0.178706	-88.7916	177.056	-3.85272e-05	0.510347	-36.9918	1179.09	-1.61623e-07	0.00657541	-53.7894	773.914	-3.36631e-07	0.0100619	-74.855	314.426	-1.07164e-06	0.0210297	-89.5859	206.441	-5.32117e-06	0.0550775
-36.3173	3427.06	-1.66327e-06	0.0648522	-20.971	628.291	-7.92266e-07	0.0463794	-30.6002	271.738	-8.58538e-07	0.0570188	-28.2383	82.5542	2.61638e-07	0.0541537	-71.1178	230.711	-6.5352e-06	0.179506	-88.8082	177.604	-3.8801e-05	0.511147	-37.6425	1211.82	-1.66528e-07	0.00667541	-54.1403	788.364	-3.43852e-07	0.0101619	-74.9593	317.328	-1.08614e-06	0.0211297	-89.6038	207.184	-5.3583e-06	0.0551775
-36.5175	3455.82	-1.67765e-06	0.0651522	-21.279	635.439	-8.02986e-07	0.0466794	-30.8379	274.303	-8.71365e-07	0.0573188	-28.9119	84.7431	2.28812e-07	0.0549537	-71.2276	232.692	-6.63425e-06	0.180306	-88.8247	178.152	-3.90753e-05	0.511947	-42.4006	1489.55	-2.08161e-07	0.00747541	-56.7668	908.75	-4.04016e-07	0.0109619	-75.7636	341.026	-1.2046e-06	0.0219297	-89.7452	213.173	-5.65772e-06	0.0559775
-36.7165	3484.7	-1.69209e-06	0.0654522	-21.5847	642.626	-8.13766e-07	0.0469794	-31.0739	276.881	-8.84253e-07	0.0576188	-29.573	86.9601	1.95563e-07	0.0557537	-71.3365	234.682	-6.73373e-06	0.181106	-88.8412	178.702	-3.935e-05	0.512747	-46.4839	1795.64	-2.54046e-07	0.00827541	-59.1085	1037.64	-4.68432e-07	0.0117619	-76.5178	365.575	-1.32731e-06	0.0227297	-89.8827	219.248	-5.9614e-06	0.0567775
-36.9142	3513.7	-1.70659e-06	0.0657522	-21.888	649.852	-8.24604e-07	0.0472794	-31.3084	279.471	-8.972e-07	0.0579188	-30.2219	89.2053	1.61892e-07	0.0565537	-71.4446	236.68	-6.83363e-06	0.181906	-88.8576	179.252	-3.96251e-05	0.513547	-50.0265	2130.06	-3.04183e-07	0.00907541	-61.2096	1175.03	-5.37101e-07	0.0125619	-77.2264	390.974	-1.45428e-06	0.0235297	-90.0166	225.407	-6.26933e-06	0.0575775
-37.1106	3542.82	-1.72115e-06	0.0660522	-22.189	657.119	-8.35503e-07	0.0475794	-31.5412	282.072	-9.10206e-07	0.0582188	-30.859	91.4786	1.27798e-07	0.0573537	-71.5518	238.687	-6.93396e-06	0.182706	-88.874	179.803	-3.99007e-05	0.514347	-53.129	2492.83	-3.58572e-07	0.00987541	-63.1053	1320.92	-6.10021e-07	0.0133619	-77.8935	417.223	-1.58549e-06	0.0243297	-90.147	231.651	-6.58151e-06	0.0583775
-37.3059	3572.06	-1.73577e-06	0.0663522	-22.4877	664.425	-8.4646e-07	0.0478794	-31.7725	284.686	-9.23271e-07	0.0585188	-31.4845	93.7802	9.32813e-08	0.0581537	-71.6583	240.702	-7.0347e-06	0.183506	-88.8903	180.355	-4.01766e-05	0.515147	-55.8688	2883.95	-4.17213e-07	0.0106754	-64.8242	1475.32	-6.87193e-07	0.0141619	-78.5226	444.322	-1.72096e-06	0.0251297	-90.274	237.98	-6.89795e-06	0.0591775
-37.4999	3601.42	-1.75045e-06	0.0666522	-22.784	671.77	-8.57477e-07	0.0481794	-32.0023	287.311	-9.36396e-07	0.0588188	-32.0988	96.1099	5.83418e-08	0.0589537	-71.764	242.725	-7.13587e-06	0.184306	-88.9066	180.908	-4.0453e-05	0.515947	-58.3058	3303.41	-4.80107e-07	0.0114754	-66.3901	1638.22	-7.68617e-07	0.0149619	-79.1168	472.272	-1.86068e-06	0.0259297	-90.3978	244.395	-7.21863e-06	0.0599775
-37.6927	3630.89	-1.76518e-06	0.0669522	-23.0782	679.155	-8.68554e-07	0.0484794	-32.2305	289.948	-9.49581e-07	0.0591188	-32.7022	98.4678	2.29797e-08	0.0597537	-71.8689	244.757	-7.23746e-06	0.185106	-88.9228	181.461	-4.07298e-05	0.516747	-60.4878	3751.22	-5.47252e-07	0.0122754	-67.8225	1809.63	-8.54294e-07	0.0157619	-79.6791	501.072	-2.00465e-06	0.0267297	-90.5185	250.894	-7.54357e-06	0.0607775
-37.8844	3660.48	-1.77998e-06	0.0672522	-23.3701	686.58	-8.7969e-07	0.0487794	-32.4571	292.597	-9.62825e-07	0.0594188	-33.295	100.854	-1.2805e-08	0.0605537	-71.973	246.797	-7.33948e-06	0.185906	-88.939	182.016	-4.10071e-05	0.517547	-62.4527	4227.37	-6.18649e-07	0.0130754	-69.1378	1989.54	-9.44222e-07	0.0165619	-80.2118	530.722	-2.15287e-06	0.0275297	-90.6362	257.479	-7.87276e-06	0.0615775
-38.0748	3690.2	-1.79483e-06	0.0675522	-23.6597	694.044	-8.90885e-07	0.0490794	-32.6823	295.258	-9.76128e-07	0.0597188	-33.8774	103.268	-4.90125e-08	0.0613537	-72.0763	248.846	-7.44191e-06	0.186706	-88.9551	182.571	-4.12847e-05	0.518347	-64.2313	4731.87	-6.94299e-07	0.0138754	-70.3497	2177.95	-1.0384e-06	0.0173619	-80.7173	561.223	-2.30535e-06	0.0283297	-90.751	264.148	-8.2062e-06	0.0623775
-38.2641	3720.03	-1.80975e-06	0.0678522	-23.9472	701.548	-9.0214e-07	0.0493794	-32.9059	297.931	-9.89491e-07	0.0600188	-34.4498	105.71	-8.56426e-08	0.0621537	-72.1789	250.903	-7.54477e-06	0.187506	-88.9712	183.127	-4.15628e-05	0.519147	-65.8491	5264.72	-7.742e-07	0.0146754	-71.47	2374.87	-1.13684e-06	0.0181619	-81.1976	592.574	-2.46207e-06	0.0291297	-90.863	270.903	-8.5439e-06	0.0631775
-38.4523	3749.98	-1.82472e-06	0.0681522	-24.2326	709.092	-9.13454e-07	0.0496794	-33.1281	300.616	-1.00291e-06	0.0603188	-35.0123	108.181	-1.22695e-07	0.0629537	-72.2808	252.969	-7.64806e-06	0.188306	-88.9872	183.684	-4.18413e-05	0.519947	-67.3268	5825.91	-8.58354e-07	0.0154754	-72.5088	2580.29	-1.23952e-06	0.0189619	-81.6546	624.775	-2.62305e-06	0.0299297	-90.9723	277.742	-8.88584e-06	0.0639775
-38.6393	3780.05	-1.83976e-06	0.0684522	-24.5158	716.675	-9.24828e-07	0.0499794	-33.3488	303.313	-1.0164e-06	0.0606188	-35.5653	110.68	-1.60171e-07	0.0637537	-72.3819	255.043	-7.75176e-06	0.189106	-89.0032	184.242	-4.21203e-05	0.520747	-68.682	6415.45	-9.4676e-07	0.0162754	-73.4745	2794.21	-1.34646e-06	0.0197619	-82.0898	657.827	-2.78828e-06	0.0307297	-91.079	284.667	-9.23204e-06	0.0647775
-38.8252	3810.24	-1.85485e-06	0.0687522	-24.7969	724.298	-9.36261e-07	0.0502794	-33.5681	306.021	-1.02994e-06	0.0609188	-36.1089	113.207	-1.98069e-07	0.0645537	-72.4822	257.126	-7.85589e-06	0.189906	-89.0192	184.801	-4.23996e-05	0.521547	-69.9292	7033.33	-1.03942e-06	0.0170754	-74.3747	3016.64	-1.45765e-06	0.0205619	-82.5049	691.729	-2.95777e-06	0.0315297	-91.1833	291.676	-9.58249e-06	0.0655775
-39.0099	3840.55	-1.87e-06	0.0690522	-25.0759	731.961	-9.47754e-07	0.0505794	-33.7859	308.741	-1.04354e-06	0.0612188	-36.6434	115.762	-2.3639e-07	0.0653537	-72.5819	259.217	-7.96044e-06	0.190706	-89.0351	185.36	-4.26794e-05	0.522347	-71.0808	7679.56	-1.13633e-06	0.0178754	-75.2158	3247.57	-1.57309e-06	0.0213619	-82.9011	726.481	-3.1315e-06	0.0323297	-91.2851	298.771	-9.93719e-06	0.0663775
-39.1936	3870.97	-1.88521e-06	0.0693522	-25.3529	739.663	-9.59306e-07	0.0508794	-34.0023	311.474	-1.0572e-06	0.0615188	-37.1691	118.345	-2.75133e-07	0.0661537	-72.6808	261.317	-8.06541e-06	0.191506	-89.0509	185.921	-4.29596e-05	0.523147	-72.1475	8354.14	-1.23749e-06	0.0186754	-76.0034	3487	-1.69278e-06	0.0221619	-83.2798	762.084	-3.30949e-06	0.0331297	-91.3846	305.95	-1.02961e-05	0.0671775
-39.3761	3901.52	-1.90049e-06	0.0696522	-25.6278	747.405	-9.70918e-07	0.0511794	-34.2173	314.218	-1.07092e-06	0.0618188	-37.6861	120.956	-3.143e-07	0.0669537	-72.779	263.425	-8.17081e-06	0.192306	-89.0668	186.482	-4.32402e-05	0.523947	-73.1382	9057.06	-1.3429e-06	0.0194754	-76.7424	3734.94	-1.81672e-06	0.0229619	-83.6421	798.537	-3.49173e-06	0.0339297	-91.4818	313.215	-1.06594e-05	0.0679775
-39.5576	3932.18	-1.91582e-06	0.0699522	-25.9007	755.186	-9.82588e-07	0.0514794	-34.4308	316.974	-1.0847e-06	0.0621188	-37.8778	121.943	-3.29096e-07	0.0672537	-72.8156	264.217	-8.21044e-06	0.192606	-89.0727	186.693	-4.33455e-05	0.524247	-73.4919	9327.96	-1.38353e-06	0.0197754	-77.008	3830.11	-1.8643e-06	0.0232619	-83.7739	812.426	-3.56116e-06	0.0342297	-91.5177	315.961	-1.07967e-05	0.0682775
-39.7379	3962.96	-1.93121e-06	0.0702522	-26.1716	763.007	-9.94319e-07	0.0517794	-34.6431	319.742	-1.09853e-06	0.0624188	-38.0683	122.934	-3.43952e-07	0.0675537	-72.8522	265.011	-8.25013e-06	0.192906	-89.0786	186.904	-4.34509e-05	0.524547	-73.8363	9602.85	-1.42475e-06	0.0200754	-77.2675	3926.48	-1.91247e-06	0.0235619	-83.9036	826.435	-3.6312e-06	0.0345297	-91.5533	318.719	-1.09346e-05	0.0685775
-39.9172	3993.87	-1.94666e-06	0.0705522	-26.4405	770.868	-1.00611e-06	0.0520794	-34.8539	322.522	-1.11243e-06	0.0627188	-38.2577	123.928	-3.58867e-07	0.0678537	-72.8886	265.806	-8.28988e-06	0.193206	-89.0845	187.114	-4.35564e-05	0.524847	-74.1718	9881.73	-1.46658e-06	0.0203754	-77.5213	4024.04	-1.96125e-06	0.0238619	-84.0313	840.563	-3.70183e-06	0.0348297	-91.5886	321.49	-1.1073e-05	0.0688775
-40.0954	4024.89	-1.96217e-06	0.0708522	-26.7075	778.768	-1.01796e-06	0.0523794	-35.0634	325.313	-1.12639e-06	0.0630188	-38.4459	124.926	-3.73842e-07	0.0681537	-72.925	266.602	-8.32969e-06	0.193506	-89.0904	187.325	-4.36619e-05	0.525147	-74.4989	10164.6	-1.509e-06	0.0206754	-77.7695	4122.8	-2.01061e-06	0.0241619	-84.157	854.811	-3.77306e-06	0.0351297	-91.6237	324.272	-1.12121e-05	0.0691775
-40.2726	4056.03	-1.97774e-06	0.0711522	-26.9725	786.708	-1.02987e-06	0.0526794	-35.2715	328.117	-1.14041e-06	0.0633188	-38.6329	125.929	-3.88876e-07	0.0684537	-72.9612	267.4	-8.36956e-06	0.193806	-89.0963	187.537	-4.37675e-05	0.525447	-74.8178	10451.4	-1.55201e-06	0.0209754	-78.0122	4222.75	-2.06058e-06	0.0244619	-84.2807	869.178	-3.84489e-06	0.0354297	-91.6584	327.066	-1.13518e-05	0.0694775
-40.4487	4087.28	-1.99336e-06	0.0714522	-27.2356	794.687	-1.04183e-06	0.0529794	-35.4783	330.933	-1.15448e-06	0.0636188	-38.8189	126.935	-4.03969e-07	0.0687537	-72.9974	268.199	-8.40949e-06	0.194106	-89.1022	187.748	-4.38731e-05	0.525747	-75.1288	10742.3	-1.59563e-06	0.0212754	-78.2497	4323.9	-2.11115e-06	0.0247619	-84.4024	883.666	-3.91731e-06	0.0357297	-91.6928	329.872	-1.14921e-05	0.0697775
-40.6238	4118.66	-2.00905e-06	0.0717522	-27.4969	802.706	-1.05386e-06	0.0532794	-35.6838	333.76	-1.16862e-06	0.0639188	-39.0037	127.946	-4.19122e-07	0.0690537	-73.0335	268.998	-8.44948e-06	0.194406	-89.108	187.959	-4.39788e-05	0.526047	-75.4323	11037.1	-1.63984e-06	0.0215754	-78.4821	4426.24	-2.16231e-06	0.0250619	-84.5223	898.272	-3.99034e-06	0.0360297	-91.727	332.69	-1.1633e-05	0.0700775
-40.7979	4150.16	-2.0248e-06	0.0720522	-27.7562	810.765	-1.06595e-06	0.0535794	-35.888	336.599	-1.18281e-06	0.0642188	-39.1873	128.96	-4.34334e-07	0.0693537	-73.0694	269.799	-8.48953e-06	0.194706	-89.1139	188.171	-4.40846e-05	0.526347	-75.7284	11335.9	-1.68466e-06	0.0218754	-78.7096	4529.78	-2.21407e-06	0.0253619	-84.6404	912.998	-4.06396e-06	0.0363297	-91.7608	335.519	-1.17745e-05	0.0703775
-40.9709	4181.77	-2.0406e-06	0.0723522	-28.0138	818.864	-1.0781e-06	0.0538794	-36.0909	339.45	-1.19707e-06	0.0645188	-39.3699	129.978	-4.49606e-07	0.0696537	-73.1053	270.601	-8.52964e-06	0.195006	-89.1198	188.382	-4.41904e-05	0.526647	-76.0174	11638.7	-1.73007e-06	0.0221754	-78.9323	4634.52	-2.26643e-06	0.0256619	-84.7567	927.844	-4.13818e-06	0.0366297	-91.7944	338.361	-1.19166e-05	0.0706775
-41.143	4213.51	-2.05647e-06	0.0726522	-28.2695	827.002	-1.0903e-06	0.0541794	-36.2925	342.313	-1.21138e-06	0.0648188	-39.5514	131	-4.64937e-07	0.0699537	-73.1411	271.405	-8.56981e-06	0.195306	-89.1256	188.594	-4.42963e-05	0.526947	-76.2997	11945.5	-1.77607e-06	0.0224754	-79.1505	4740.45	-2.31939e-06	0.0259619	-84.8712	942.81	-4.213e-06	0.0369297	-91.8277	341.215	-1.20592e-05	0.0709775

## Sheet: Fig. 7c k2-k1
			k2/k1=100	k2/k1=10	k2/k1=4	k2/k1=2	k2/k1=1	k2/k1=0.5	k2/k1=0.2
eeL	β	α	eeP	eeP	eeP	eeP	eeP	eeP	eeP
0	1.62479e-06	0.00254935	0	0	0	0	0	0	0		k1	KHomo	ee1	[Cattot]
0.0418683	1.62478e-06	0.00254965	-2.20105	0.172612	0.878006	1.18615	1.35888	1.45059	1.50745		var	33	1	0.11
0.0592134	1.62478e-06	0.00254995	-3.112	0.243911	1.24144	1.67723	1.92153	2.05123	2.13165		k2	KHetero	ee2
0.0725246	1.62477e-06	0.00255025	-3.81048	0.298484	1.52014	2.05389	2.35312	2.51198	2.61049		10	33000	-1
0.0936375	1.62476e-06	0.00255085	-4.91692	0.38471	1.96171	2.65082	3.03717	3.2423	3.36949		k2'
0.110804	1.62475e-06	0.00255145	-5.81496	0.454449	2.32021	3.13561	3.59281	3.83557	3.98609		0
0.125651	1.62474e-06	0.00255205	-6.59035	0.514451	2.62982	3.55446	4.07293	4.34824	4.51896
0.147113	1.62472e-06	0.00255305	-7.70862	0.600584	3.07649	4.15901	4.76609	5.08846	5.28837
0.165831	1.6247e-06	0.00255405	-8.68109	0.675041	3.46509	4.68528	5.36964	5.73309	5.95847
0.182651	1.62467e-06	0.00255505	-9.55241	0.741354	3.81342	5.15729	5.91112	6.31148	6.55977
0.225758	1.62461e-06	0.00255805	-11.7731	0.908358	4.70188	6.36263	7.29456	7.78961	8.09665
0.261925	1.62455e-06	0.00256105	-13.6201	1.04468	5.44177	7.36824	8.44967	9.02426	9.38067
0.322455	1.62443e-06	0.00256705	-16.6726	1.26362	6.66662	9.03746	10.3693	11.0773	11.5165
0.373469	1.62431e-06	0.00257305	-19.2015	1.43771	7.68366	10.4286	11.9717	12.7923	13.3015
0.418463	1.62419e-06	0.00257905	-21.3945	1.58226	8.5674	11.6419	13.3716	14.2917	14.8629
0.45921	1.62406e-06	0.00258505	-23.3472	1.70515	9.35589	12.7285	14.6273	15.6377	16.2651
0.496755	1.62394e-06	0.00259105	-25.1168	1.81114	10.0717	13.7186	15.7733	16.8672	17.5465
0.553964	1.62374e-06	0.00260105	-27.7544	1.95833	11.1409	15.2052	17.4978	18.7191	19.4779
0.606094	1.62353e-06	0.00261105	-30.0929	2.07643	12.0912	16.5348	19.0444	20.3823	21.2137
0.65436	1.62333e-06	0.00262105	-32.2001	2.17139	12.9492	17.7433	20.454	21.9001	22.7991
0.699563	1.62313e-06	0.00263105	-34.1214	2.24722	13.7328	18.8542	21.7536	23.3013	24.2638
0.821702	1.62251e-06	0.00266105	-39.0508	2.38573	15.7472	21.7488	25.1584	26.9821	28.1175
0.929685	1.6219e-06	0.00269105	-43.0836	2.4243	17.396	24.1692	28.0305	30.0998	31.3896
1.028	1.62128e-06	0.00272105	-46.4892	2.38947	18.7842	26.2534	30.5262	32.8204	34.2519
1.20491	1.62004e-06	0.00278105	-51.9969	2.1602	21.0048	29.7078	34.7203	37.4218	39.1111
1.364	1.61879e-06	0.00284105	-56.3091	1.77877	22.6969	32.4855	38.1604	41.2303	43.154
1.51097	1.61753e-06	0.00290105	-59.8035	1.29051	24.0111	34.7789	41.0617	44.4729	46.615
1.73739	1.61542e-06	0.00300105	-64.3817	0.31387	25.5956	37.8219	45.0302	48.9671	51.4478
1.94781	1.61329e-06	0.00310105	-67.8954	-0.796988	26.6328	40.1545	48.2067	52.6299	55.4263
2.14714	1.61114e-06	0.00320105	-70.6849	-1.99068	27.2753	41.9671	50.8011	55.6812	58.7764
2.33843	1.60897e-06	0.00330105	-72.957	-3.23399	27.6217	43.3826	52.9485	58.2619	61.6427
2.52369	1.60678e-06	0.00340105	-74.846	-4.50451	27.7403	44.4858	54.7418	60.469	64.1246
2.70433	1.60457e-06	0.00350105	-76.4431	-5.78666	27.6801	45.338	56.2483	62.3728	66.294
3.22773	1.59782e-06	0.00380105	-80.0447	-9.60753	26.7534	46.7978	59.4959	66.7319	71.4063
3.7351	1.59089e-06	0.00410105	-82.5334	-13.2832	25.1317	47.1545	61.4324	69.6853	75.0624
4.2354	1.58378e-06	0.00440105	-84.3725	-16.7538	23.1347	46.827	62.5228	71.7189	77.7601
4.73382	1.57649e-06	0.00470105	-85.7985	-20.0039	20.9391	46.0569	63.0386	73.1178	79.7921
5.23361	1.56902e-06	0.00500105	-86.9447	-23.0372	18.6485	44.9937	63.1505	74.062	81.3436
5.73694	1.56137e-06	0.00530105	-87.8915	-25.8654	16.3258	43.7342	62.971	74.6709	82.5378
6.24536	1.55354e-06	0.00560105	-88.6906	-28.5032	14.01	42.3433	62.5771	75.0269	83.4598
6.75997	1.54553e-06	0.00590105	-89.3769	-30.966	11.7254	40.8659	62.0235	75.1887	84.1707
7.8109	1.52896e-06	0.00650105	-90.5008	-35.4246	7.30475	37.7682	60.5844	75.0899	85.1257
8.89438	1.51167e-06	0.00710105	-91.389	-39.3472	3.12497	34.6014	58.8627	74.604	85.643
10.0133	1.49367e-06	0.00770105	-92.113	-42.8216	-0.797974	31.4504	56.9789	73.8663	85.8649
11.1696	1.47494e-06	0.00830105	-92.7171	-45.9189	-4.4683	28.3612	55.0058	72.9606	85.8807
12.3646	1.45548e-06	0.00890105	-93.2302	-48.6968	-7.89898	25.3585	52.9892	71.9413	85.7487
13.5993	1.43531e-06	0.00950105	-93.6726	-51.2019	-11.1064	22.4548	50.9585	70.8447	85.5083
14.8743	1.41442e-06	0.010101	-94.0584	-53.4725	-14.1077	19.6554	48.933	69.6959	85.187
17.0903	1.37799e-06	0.011101	-94.6033	-56.8187	-18.6968	15.2238	45.6014	67.7106	84.5228
19.4217	1.33956e-06	0.012101	-95.0542	-59.7134	-22.8303	11.0766	42.3536	65.681	83.7479
21.8695	1.29913e-06	0.013101	-95.4341	-62.2425	-26.5694	7.19745	39.2068	63.6391	82.9002
24.4347	1.25669e-06	0.014101	-95.7588	-64.4714	-29.9661	3.56709	36.1686	61.6049	82.0042
27.1177	1.21225e-06	0.015101	-96.0397	-66.4507	-33.0643	0.165925	33.2412	59.5906	81.0762
29.9192	1.1658e-06	0.016101	-96.2853	-68.2202	-35.9012	-3.02481	30.4235	57.604	80.1275
32.8393	1.11735e-06	0.017101	-96.5019	-69.8117	-38.508	-6.02261	27.7127	55.65	79.1659
35.8784	1.06689e-06	0.018101	-96.6944	-71.2508	-40.9114	-8.84348	25.105	53.7317	78.1969
39.0367	1.01444e-06	0.019101	-96.8667	-72.5586	-43.1342	-11.502	22.5964	51.8506	77.2246
42.3143	9.59973e-07	0.020101	-97.0217	-73.7522	-45.196	-14.0113	20.1822	50.0078	76.2521
45.7114	9.03507e-07	0.021101	-97.1621	-74.846	-47.1135	-16.3833	17.8582	48.2034	75.2816
49.228	8.45036e-07	0.022101	-97.2897	-75.8521	-48.9013	-18.6288	15.62	46.4374	74.3147
52.8643	7.84562e-07	0.023101	-97.4063	-76.7806	-50.5722	-20.7574	13.4632	44.7094	73.3528
56.6204	7.22083e-07	0.024101	-97.5132	-77.6401	-52.1372	-22.7779	11.384	43.0187	72.3967
60.4962	6.57601e-07	0.025101	-97.6117	-78.4382	-53.6061	-24.6983	9.37842	41.3647	71.4472
64.4919	5.91114e-07	0.026101	-97.7026	-79.1811	-54.9875	-26.5257	7.44283	39.7466	70.505
68.6075	5.22623e-07	0.027101	-97.7868	-79.8745	-56.2889	-28.2667	5.57378	38.1634	69.5703
72.843	4.52129e-07	0.028101	-97.865	-80.5231	-57.5171	-29.9273	3.76801	36.6144	68.6435
77.1984	3.7963e-07	0.029101	-97.9379	-81.1311	-58.6782	-31.5128	2.02248	35.0986	67.7248
81.6739	3.05128e-07	0.030101	-98.006	-81.7023	-59.7774	-33.0283	0.334276	33.6151	66.8144
86.2694	2.28621e-07	0.031101	-98.0697	-82.2398	-60.8197	-34.4782	-1.29931	32.163	65.9125
90.9849	1.5011e-07	0.032101	-98.1294	-82.7466	-61.8092	-35.8667	-2.88084	30.7415	65.019
95.8204	6.95957e-08	0.033101	-98.1856	-83.2253	-62.75	-37.1976	-4.41272	29.3497	64.134
100.776	-1.2923e-08	0.034101	-98.2384	-83.6781	-63.6455	-38.4745	-5.89723	27.9867	63.2575
100.927	-1.54295e-08	0.034131	-98.24	-83.6913	-63.6717	-38.512	-5.94105	27.9462	63.2314
101.077	-1.79378e-08	0.034161	-98.2415	-83.7045	-63.6978	-38.5494	-5.98484	27.9058	63.2052
101.228	-2.0448e-08	0.034191	-98.243	-83.7176	-63.724	-38.5868	-6.02858	27.8654	63.1791
101.379	-2.29599e-08	0.034221	-98.2446	-83.7308	-63.75	-38.6242	-6.07229	27.825	63.1529
101.53	-2.54736e-08	0.034251	-98.2461	-83.7439	-63.7761	-38.6615	-6.11595	27.7847	63.1268
101.681	-2.79892e-08	0.034281	-98.2476	-83.757	-63.8021	-38.6988	-6.15957	27.7444	63.1007
102.185	-3.63873e-08	0.034381	-98.2527	-83.8005	-63.8885	-38.8227	-6.30469	27.6101	63.0137
102.691	-4.48055e-08	0.034481	-98.2577	-83.8438	-63.9746	-38.9462	-6.44937	27.4761	62.9267
103.197	-5.32438e-08	0.034581	-98.2627	-83.8868	-64.0602	-39.0691	-6.59359	27.3425	62.8399
103.705	-6.1702e-08	0.034681	-98.2677	-83.9297	-64.1454	-39.1915	-6.73738	27.209	62.7531
104.214	-7.01804e-08	0.034781	-98.2726	-83.9722	-64.2302	-39.3135	-6.88073	27.0759	62.6664
104.725	-7.86787e-08	0.034881	-98.2776	-84.0146	-64.3146	-39.4349	-7.02363	26.943	62.5798
105.236	-8.71971e-08	0.034981	-98.2825	-84.0568	-64.3986	-39.5559	-7.1661	26.8104	62.4933
105.749	-9.57356e-08	0.035081	-98.2873	-84.0987	-64.4822	-39.6764	-7.30814	26.6781	62.4069
106.263	-1.04294e-07	0.035181	-98.2922	-84.1404	-64.5654	-39.7964	-7.44974	26.5461	62.3205
106.778	-1.12873e-07	0.035281	-98.297	-84.1819	-64.6483	-39.9159	-7.59092	26.4143	62.2342
107.295	-1.21471e-07	0.035381	-98.3018	-84.2231	-64.7307	-40.035	-7.73166	26.2828	62.1481
107.812	-1.3009e-07	0.035481	-98.3065	-84.2642	-64.8128	-40.1536	-7.87198	26.1516	62.062
108.331	-1.38728e-07	0.035581	-98.3112	-84.305	-64.8944	-40.2717	-8.01187	26.0206	61.976
108.851	-1.47387e-07	0.035681	-98.3159	-84.3456	-64.9757	-40.3894	-8.15134	25.8899	61.89
109.372	-1.56066e-07	0.035781	-98.3206	-84.3861	-65.0567	-40.5066	-8.29039	25.7595	61.8042
109.894	-1.64764e-07	0.035881	-98.3253	-84.4263	-65.1372	-40.6233	-8.42902	25.6293	61.7185
110.418	-1.73483e-07	0.035981	-98.3299	-84.4663	-65.2174	-40.7396	-8.56723	25.4994	61.6328
110.943	-1.82222e-07	0.036081	-98.3345	-84.5061	-65.2972	-40.8554	-8.70503	25.3698	61.5472
111.468	-1.90981e-07	0.036181	-98.3391	-84.5456	-65.3766	-40.9708	-8.84241	25.2404	61.4617
111.996	-1.9976e-07	0.036281	-98.3436	-84.585	-65.4557	-41.0857	-8.97939	25.1113	61.3763
112.524	-2.08559e-07	0.036381	-98.3481	-84.6242	-65.5345	-41.2002	-9.11595	24.9825	61.2909
113.054	-2.17378e-07	0.036481	-98.3526	-84.6632	-65.6128	-41.3142	-9.2521	24.8539	61.2057
113.584	-2.26217e-07	0.036581	-98.3571	-84.702	-65.6908	-41.4278	-9.38785	24.7256	61.1205
114.116	-2.35076e-07	0.036681	-98.3616	-84.7406	-65.7685	-41.5409	-9.52319	24.5975	61.0355
114.649	-2.43955e-07	0.036781	-98.366	-84.779	-65.8458	-41.6536	-9.65813	24.4697	60.9505
115.184	-2.52854e-07	0.036881	-98.3704	-84.8172	-65.9227	-41.7659	-9.79267	24.3422	60.8655
115.719	-2.61773e-07	0.036981	-98.3748	-84.8552	-65.9993	-41.8778	-9.92682	24.2149	60.7807
116.256	-2.70713e-07	0.037081	-98.3791	-84.8931	-66.0756	-41.9892	-10.0606	24.0879	60.696
116.794	-2.79672e-07	0.037181	-98.3835	-84.9307	-66.1515	-42.1002	-10.1939	23.9611	60.6113
117.333	-2.88651e-07	0.037281	-98.3878	-84.9682	-66.2271	-42.2108	-10.3269	23.8346	60.5267
117.874	-2.97651e-07	0.037381	-98.3921	-85.0054	-66.3024	-42.3209	-10.4594	23.7084	60.4422
118.415	-3.0667e-07	0.037481	-98.3963	-85.0425	-66.3773	-42.4306	-10.5916	23.5824	60.3578
118.958	-3.1571e-07	0.037581	-98.4006	-85.0794	-66.4519	-42.54	-10.7234	23.4566	60.2735
119.502	-3.24769e-07	0.037681	-98.4048	-85.1161	-66.5261	-42.6489	-10.8548	23.3311	60.1893
120.047	-3.33849e-07	0.037781	-98.409	-85.1527	-66.6	-42.7573	-10.9858	23.2059	60.1051
120.593	-3.42948e-07	0.037881	-98.4132	-85.189	-66.6736	-42.8654	-11.1164	23.0809	60.021
121.141	-3.52068e-07	0.037981	-98.4173	-85.2252	-66.7469	-42.9731	-11.2467	22.9561	59.937
121.69	-3.61207e-07	0.038081	-98.4214	-85.2612	-66.8198	-43.0804	-11.3765	22.8317	59.8531
122.24	-3.70367e-07	0.038181	-98.4255	-85.297	-66.8925	-43.1872	-11.506	22.7074	59.7693
122.791	-3.79547e-07	0.038281	-98.4296	-85.3327	-66.9648	-43.2937	-11.6351	22.5834	59.6856
123.343	-3.88746e-07	0.038381	-98.4337	-85.3682	-67.0368	-43.3997	-11.7639	22.4597	59.6019
123.897	-3.97966e-07	0.038481	-98.4377	-85.4035	-67.1085	-43.5054	-11.8922	22.3362	59.5183
124.452	-4.07206e-07	0.038581	-98.4418	-85.4386	-67.1798	-43.6107	-12.0202	22.2129	59.4348
125.008	-4.16466e-07	0.038681	-98.4458	-85.4736	-67.2509	-43.7156	-12.1478	22.0899	59.3514
125.565	-4.25746e-07	0.038781	-98.4498	-85.5084	-67.3217	-43.8201	-12.2751	21.9672	59.2681
126.123	-4.35046e-07	0.038881	-98.4537	-85.543	-67.3921	-43.9242	-12.402	21.8447	59.1848
126.683	-4.44366e-07	0.038981	-98.4577	-85.5775	-67.4623	-44.0279	-12.5285	21.7224	59.1017
131.203	-5.19647e-07	0.039781	-98.4885	-85.8474	-68.0127	-44.844	-13.5276	20.7529	58.4393
135.799	-5.96211e-07	0.040581	-98.5181	-86.1075	-68.5449	-45.6367	-14.5042	19.7987	57.7822
140.473	-6.74058e-07	0.041381	-98.5466	-86.3581	-69.0596	-46.407	-15.4591	18.8592	57.1303
145.224	-7.53187e-07	0.042181	-98.574	-86.5998	-69.5578	-47.1557	-16.3929	17.9344	56.4835
150.051	-8.33599e-07	0.042981	-98.6004	-86.8331	-70.0401	-47.8838	-17.3063	17.0237	55.8419
154.956	-9.15293e-07	0.043781	-98.6258	-87.0585	-70.5074	-48.5921	-18.2	16.1268	55.2053
159.937	-9.9827e-07	0.044581	-98.6503	-87.2762	-70.9604	-49.2813	-19.0746	15.2436	54.5737
164.995	-1.08253e-06	0.045381	-98.674	-87.4867	-71.3996	-49.9524	-19.9307	14.3736	53.9472
170.13	-1.16807e-06	0.046181	-98.6968	-87.6904	-71.8257	-50.6059	-20.7689	13.5166	53.3255
175.342	-1.2549e-06	0.046981	-98.7189	-87.8875	-72.2393	-51.2426	-21.5897	12.6723	52.7087
180.631	-1.343e-06	0.047781	-98.7402	-88.0784	-72.641	-51.863	-22.3938	11.8404	52.0967
185.997	-1.43239e-06	0.048581	-98.7609	-88.2634	-73.0312	-52.4679	-23.1815	11.0206	51.4895
191.44	-1.52306e-06	0.049381	-98.7808	-88.4428	-73.4104	-53.0578	-23.9534	10.2128	50.8871
196.96	-1.61502e-06	0.050181	-98.8002	-88.6167	-73.779	-53.6332	-24.71	9.41654	50.2893
202.556	-1.70826e-06	0.050981	-98.8189	-88.7855	-74.1376	-54.1946	-25.4516	8.63171	49.6962
208.23	-1.80278e-06	0.051781	-98.8371	-88.9493	-74.4865	-54.7426	-26.1788	7.85802	49.1076
210.377	-1.83855e-06	0.052081	-98.8437	-89.0095	-74.615	-54.9448	-26.4479	7.57071	48.8881
212.535	-1.87451e-06	0.052381	-98.8503	-89.0691	-74.7421	-55.1451	-26.715	7.28493	48.6692
214.704	-1.91064e-06	0.052681	-98.8568	-89.128	-74.868	-55.3437	-26.9802	7.00066	48.4509
216.884	-1.94696e-06	0.052981	-98.8633	-89.1863	-74.9926	-55.5405	-27.2434	6.71788	48.2333
219.075	-1.98346e-06	0.053281	-98.8696	-89.2439	-75.116	-55.7356	-27.5048	6.43659	48.0163
221.276	-2.02014e-06	0.053581	-98.8759	-89.301	-75.2382	-55.929	-27.7643	6.15678	47.7999
223.489	-2.05699e-06	0.053881	-98.8822	-89.3574	-75.3591	-56.1207	-28.0219	5.87843	47.5841
225.712	-2.09403e-06	0.054181	-98.8883	-89.4133	-75.479	-56.3107	-28.2778	5.60154	47.369
227.946	-2.13125e-06	0.054481	-98.8944	-89.4686	-75.5976	-56.4991	-28.5318	5.32609	47.1545
230.191	-2.16865e-06	0.054781	-98.9004	-89.5233	-75.7151	-56.6859	-28.784	5.05206	46.9406

## Sheet: Fig. 7d ee1 ee2
			ee1 = 100				ee2 = -100
			ee2 = -100	ee2 = -50	ee2 = 0	ee2 = 50	ee1 = 40	ee1 = -20	ee1 = -80	k1	KHomo	ee1	[Cattot]
eeL	β	α	eeP	eeP	eeP	eeP	eeP	eeP	eeP	10	100	var	0.11
1.08758e-08	1.65334e-07	0.000813226	1.11698e-06	1.16642e-06	1.21586e-06	1.2653e-06	3.87468e-07	-3.42049e-07	-1.07157e-06	k2	KHetero	ee2
0.0234082	1.65334e-07	0.000813526	2.40293	2.50932	2.61572	2.72212	0.833493	-0.735941	-2.30537	10	330000	var
0.033109	1.65333e-07	0.000813826	3.39705	3.54753	3.69801	3.84848	1.17825	-1.04055	-3.25936	k2'
0.0405559	1.65332e-07	0.000814126	4.15906	4.34336	4.52766	4.71197	1.44246	-1.27414	-3.99074	0
0.0523724	1.65331e-07	0.000814726	5.36553	5.60349	5.84145	6.07941	1.86066	-1.64421	-5.14908
0.0619857	1.6533e-07	0.000815326	6.34411	6.6257	6.90728	7.18887	2.19974	-1.94463	-6.08899
0.0703053	1.65329e-07	0.000815926	7.18849	7.5078	7.82712	8.14644	2.49221	-2.20406	-6.90033
0.0823407	1.65327e-07	0.000816926	8.40519	8.77905	9.15291	9.52677	2.91344	-2.57831	-8.07005
0.0928474	1.65325e-07	0.000817926	9.46209	9.88352	10.305	10.7264	3.27911	-2.90386	-9.08683
0.102298	1.65323e-07	0.000818926	10.408	10.8722	11.3364	11.8006	3.60618	-3.19564	-9.99746
0.126564	1.65317e-07	0.000821926	12.8136	13.3873	13.9611	14.5348	4.43693	-3.93971	-12.3163
0.146981	1.65311e-07	0.000824926	14.8077	15.4734	16.1391	16.8048	5.12428	-4.55918	-14.2426
0.181299	1.65299e-07	0.000830926	18.0872	18.9067	19.7263	20.5458	6.2514	-5.58436	-17.4201
0.210386	1.65287e-07	0.000836926	20.7858	21.7351	22.6844	23.6336	7.17523	-6.43539	-20.046
0.236185	1.65274e-07	0.000842926	23.1101	24.1738	25.2375	26.3011	7.96766	-7.17483	-22.3173
0.259679	1.65262e-07	0.000848926	25.1658	26.3331	27.5004	28.6676	8.66556	-7.83465	-24.3349
0.281446	1.6525e-07	0.000854926	27.0157	28.2785	29.5413	30.8041	9.29095	-8.43382	-26.1586
0.314852	1.6523e-07	0.000864926	29.7481	31.1564	32.5647	33.973	10.2093	-9.32956	-28.8684
0.345565	1.65209e-07	0.000874926	32.1424	33.6833	35.2242	36.7651	11.0078	-10.1267	-31.2612
0.374251	1.65189e-07	0.000884926	34.2743	35.9381	37.6018	39.2656	11.7132	-10.8478	-33.4089
0.401349	1.65168e-07	0.000894926	36.1949	37.9736	39.7524	41.5312	12.3434	-11.508	-35.3595
0.475784	1.65106e-07	0.000924926	41.0056	43.0952	45.1848	47.2745	13.8947	-13.2162	-40.3271
0.543206	1.65044e-07	0.000954926	44.7928	47.1572	49.5217	51.8862	15.0797	-14.6333	-44.3463
0.606021	1.6498e-07	0.000984926	47.8642	50.4789	53.0936	55.7082	16.0081	-15.848	-47.7042
0.722773	1.64852e-07	0.00104493	52.5269	55.5915	58.656	61.7206	17.3333	-17.8603	-53.0539
0.8321	1.64722e-07	0.00110493	55.8442	59.3126	62.781	66.2495	18.1756	-19.4931	-57.1617
0.936933	1.6459e-07	0.00116493	58.2549	62.0954	65.9359	69.7764	18.6933	-20.8682	-60.4298
1.10589	1.64365e-07	0.00126493	60.9212	65.3322	69.7432	74.1542	19.0753	-22.7706	-64.6166
1.27114	1.64134e-07	0.00136493	62.4656	67.4025	72.3394	77.2763	19.062	-24.3417	-67.7453
1.43501	1.63896e-07	0.00146493	63.2754	68.7056	74.1358	79.566	18.794	-25.6875	-70.169
1.59891	1.63653e-07	0.00156493	63.5822	69.4803	75.3784	81.2765	18.3552	-26.8718	-72.0989
1.76374	1.63403e-07	0.00166493	63.5336	69.879	76.2244	82.5698	17.7989	-27.9357	-73.6703
1.93009	1.63147e-07	0.00176493	63.2277	70.0032	76.7786	83.554	17.1606	-28.9066	-74.9737
2.44215	1.62344e-07	0.00206493	61.3544	69.3375	77.3205	85.3036	14.9621	-31.4302	-77.8225
2.97834	1.61487e-07	0.00236493	58.7213	67.8156	76.9099	86.0042	12.5753	-33.5706	-79.7165
3.54198	1.60574e-07	0.00266493	55.766	65.8962	76.0265	86.1567	10.1501	-35.4658	-81.0817
4.13486	1.59607e-07	0.00296493	52.6924	63.796	74.8996	86.0031	7.75265	-37.1871	-82.1268
4.75803	1.58586e-07	0.00326493	49.6029	61.6258	73.6487	85.6715	5.41372	-38.7755	-82.9647
5.41216	1.5751e-07	0.00356493	46.5515	59.4458	72.3402	85.2346	3.14733	-40.2568	-83.6609
6.09768	1.56379e-07	0.00386493	43.5668	57.2897	71.0126	84.7356	0.959193	-41.6484	-84.256
6.81491	1.55194e-07	0.00416493	40.6639	55.1764	69.6888	84.2013	-1.14935	-42.9627	-84.776
7.56407	1.53954e-07	0.00446493	37.8503	53.1164	68.3826	83.6488	-3.17929	-44.2089	-85.2384
8.34531	1.52659e-07	0.00476493	35.1285	51.1154	67.1023	83.0892	-5.13283	-45.3942	-85.6556
9.15876	1.5131e-07	0.00506493	32.4988	49.1758	65.8528	82.5298	-7.01284	-46.5245	-86.0362
10.0045	1.49907e-07	0.00536493	29.9597	47.2983	64.6369	81.9755	-8.82246	-47.6046	-86.3867
10.8826	1.48449e-07	0.00566493	27.5086	45.4822	63.4558	81.4295	-10.5649	-48.6384	-86.7119
11.7932	1.46936e-07	0.00596493	25.1426	43.7263	62.3101	80.8938	-12.2435	-49.6295	-87.0156
12.7362	1.45369e-07	0.00626493	22.8585	42.029	61.1995	80.37	-13.8612	-50.5809	-87.3006
13.7118	1.43747e-07	0.00656493	20.6528	40.3881	60.1234	79.8587	-15.4212	-51.4953	-87.5693
14.7199	1.4207e-07	0.00686493	18.5223	38.8017	59.0811	79.3604	-16.9263	-52.3749	-87.8236
15.7605	1.40339e-07	0.00716493	16.4637	37.2676	58.0715	78.8754	-18.3792	-53.2221	-88.0649
16.8338	1.38554e-07	0.00746493	14.4736	35.7836	57.0935	78.4035	-19.7825	-54.0386	-88.2947
17.9397	1.36714e-07	0.00776493	12.5491	34.3476	56.1461	77.9447	-21.1386	-54.8263	-88.514
19.0782	1.34819e-07	0.00806493	10.6871	32.9576	55.2281	77.4987	-22.4498	-55.5867	-88.7236
20.2493	1.32869e-07	0.00836493	8.88473	31.6116	54.3384	77.0653	-23.7183	-56.3214	-88.9244
21.4531	1.30865e-07	0.00866493	7.13942	30.3076	53.4759	76.6441	-24.9461	-57.0316	-89.1171
22.6896	1.28807e-07	0.00896493	5.44856	29.044	52.6394	76.2348	-26.1351	-57.7187	-89.3023
24.8229	1.25255e-07	0.00946493	2.74495	27.0226	51.3003	75.5781	-28.0353	-58.8155	-89.5957
27.0471	1.21551e-07	0.00996493	0.17546	25.1008	50.0262	74.9516	-29.8403	-59.856	-89.8717
29.362	1.17696e-07	0.0104649	-2.26943	23.2716	48.8126	74.3536	-31.557	-60.8445	-90.1321
31.7678	1.13689e-07	0.0109649	-4.59841	21.5286	47.6556	73.7825	-33.1917	-61.7851	-90.3784
34.2644	1.0953e-07	0.0114649	-6.81943	19.866	46.5514	73.2368	-34.7502	-62.6811	-90.6119
36.8519	1.0522e-07	0.0119649	-8.93974	18.2784	45.4966	72.7147	-36.2377	-63.5356	-90.8336
39.5303	1.00758e-07	0.0124649	-10.966	16.761	44.4881	72.2151	-37.6588	-64.3517	-91.0445
42.2995	9.6145e-08	0.0129649	-12.9042	15.3094	43.5229	71.7365	-39.018	-65.1317	-91.2455
45.1597	9.138e-08	0.0134649	-14.7601	13.9192	42.5985	71.2777	-40.3191	-65.8782	-91.4373
48.1107	8.64634e-08	0.0139649	-16.5386	12.5868	41.7122	70.8376	-41.5659	-66.5932	-91.6205
51.1527	8.13952e-08	0.0144649	-18.2445	11.3087	40.8618	70.415	-42.7616	-67.2787	-91.7958
54.2855	7.61754e-08	0.0149649	-19.8822	10.0815	40.0453	70.009	-43.9093	-67.9365	-91.9637
57.5093	7.08039e-08	0.0154649	-21.4556	8.90248	39.2606	69.6186	-45.0119	-68.5683	-92.1246
60.824	6.52809e-08	0.0159649	-22.9685	7.7687	38.5059	69.2431	-46.072	-69.1755	-92.2791
64.2296	5.96063e-08	0.0164649	-24.4242	6.67768	37.7796	68.8815	-47.092	-69.7597	-92.4275
67.7262	5.37801e-08	0.0169649	-25.826	5.62704	37.0801	68.5331	-48.074	-70.3221	-92.5701
71.3137	4.78022e-08	0.0174649	-27.1767	4.61458	36.4059	68.1972	-49.0203	-70.8638	-92.7074
74.9921	4.16728e-08	0.0179649	-28.4792	3.63828	35.7558	67.8733	-49.9327	-71.3861	-92.8396
78.7615	3.53917e-08	0.0184649	-29.7359	2.69623	35.1284	67.5605	-50.813	-71.89	-92.967
82.6218	2.8959e-08	0.0189649	-30.9493	1.78667	34.5226	67.2585	-51.6628	-72.3764	-93.0899
86.573	2.23748e-08	0.0194649	-32.1214	0.907948	33.9373	66.9666	-52.4838	-72.8462	-93.2085
90.6152	1.56389e-08	0.0199649	-33.2544	0.0585229	33.3715	66.6844	-53.2773	-73.3002	-93.3231
94.7484	8.75141e-09	0.0204649	-34.3503	-0.763041	32.8242	66.4114	-54.0448	-73.7393	-93.4338
98.9725	1.71232e-09	0.0209649	-35.4107	-1.55809	32.2945	66.1471	-54.7874	-74.1641	-93.5408
103.287	-5.47838e-09	0.0214649	-36.4374	-2.32789	31.7817	65.8912	-55.5064	-74.5754	-93.6444
107.693	-1.28207e-08	0.0219649	-37.432	-3.07362	31.2848	65.6432	-56.2029	-74.9738	-93.7447
112.19	-2.03146e-08	0.0224649	-38.396	-3.79639	30.8032	65.4029	-56.8779	-75.3599	-93.8418
116.778	-2.79601e-08	0.0229649	-39.3307	-4.49724	30.3362	65.1697	-57.5325	-75.7342	-93.936
121.457	-3.57572e-08	0.0234649	-40.2375	-5.17715	29.8832	64.9435	-58.1674	-76.0973	-94.0272
126.227	-4.3706e-08	0.0239649	-41.1176	-5.83706	29.4435	64.724	-58.7836	-76.4497	-94.1158
131.088	-5.18063e-08	0.0244649	-41.9721	-6.47782	29.0165	64.5107	-59.382	-76.7919	-94.2017
136.039	-6.00583e-08	0.0249649	-42.8022	-7.10026	28.6017	64.3036	-59.9632	-77.1242	-94.2852
141.082	-6.84618e-08	0.0254649	-43.6089	-7.70515	28.1986	64.1023	-60.528	-77.4471	-94.3662
146.216	-7.7017e-08	0.0259649	-44.3931	-8.29323	27.8066	63.9065	-61.0771	-77.761	-94.445
151.44	-8.57238e-08	0.0264649	-45.1558	-8.86518	27.4255	63.7161	-61.6111	-78.0663	-94.5216
152.496	-8.74833e-08	0.0265649	-45.3058	-8.97769	27.3505	63.6786	-61.7161	-78.1264	-94.5367
153.555	-8.92489e-08	0.0266649	-45.4551	-9.08959	27.2759	63.6414	-61.8206	-78.1861	-94.5517
154.619	-9.10206e-08	0.0267649	-45.6035	-9.20088	27.2017	63.6043	-61.9245	-78.2455	-94.5666
155.685	-9.27983e-08	0.0268649	-45.7511	-9.31157	27.1279	63.5675	-62.0278	-78.3046	-94.5814
156.756	-9.45821e-08	0.0269649	-45.8979	-9.42166	27.0546	63.5308	-62.1306	-78.3634	-94.5961
157.83	-9.6372e-08	0.0270649	-46.0439	-9.53115	26.9816	63.4943	-62.2329	-78.4218	-94.6108
158.907	-9.81679e-08	0.0271649	-46.1891	-9.64006	26.909	63.4581	-62.3345	-78.4799	-94.6254
159.989	-9.99699e-08	0.0272649	-46.3336	-9.74838	26.8368	63.422	-62.4357	-78.5378	-94.6398
161.074	-1.01778e-07	0.0273649	-46.4772	-9.85612	26.765	63.3861	-62.5363	-78.5953	-94.6543
162.162	-1.03592e-07	0.0274649	-46.6202	-9.96328	26.6936	63.3505	-62.6363	-78.6525	-94.6686
163.254	-1.05412e-07	0.0275649	-46.7623	-10.0699	26.6225	63.315	-62.7358	-78.7093	-94.6829
164.35	-1.07239e-07	0.0276649	-46.9037	-10.1759	26.5519	63.2797	-62.8348	-78.7659	-94.6971
165.45	-1.09071e-07	0.0277649	-47.0443	-10.2814	26.4816	63.2445	-62.9333	-78.8222	-94.7112
166.553	-1.10909e-07	0.0278649	-47.1842	-10.3863	26.4117	63.2096	-63.0312	-78.8782	-94.7252
167.66	-1.12754e-07	0.0279649	-47.3234	-10.4906	26.3421	63.1748	-63.1286	-78.9339	-94.7392
168.77	-1.14604e-07	0.0280649	-47.4618	-10.5945	26.2729	63.1403	-63.2256	-78.9893	-94.7531
169.884	-1.16461e-07	0.0281649	-47.5995	-10.6977	26.2041	63.1059	-63.322	-79.0444	-94.7669
171.002	-1.18323e-07	0.0282649	-47.7365	-10.8004	26.1356	63.0717	-63.4179	-79.0992	-94.7806
172.123	-1.20192e-07	0.0283649	-47.8728	-10.9026	26.0675	63.0376	-63.5133	-79.1538	-94.7943
173.248	-1.22067e-07	0.0284649	-48.0083	-11.0043	25.9997	63.0038	-63.6082	-79.208	-94.8079
174.377	-1.23948e-07	0.0285649	-48.1432	-11.1054	25.9323	62.9701	-63.7026	-79.262	-94.8214
175.509	-1.25835e-07	0.0286649	-48.2774	-11.206	25.8653	62.9366	-63.7965	-79.3157	-94.8349
176.645	-1.27728e-07	0.0287649	-48.4108	-11.3061	25.7986	62.9033	-63.89	-79.3691	-94.8482
177.784	-1.29627e-07	0.0288649	-48.5436	-11.4057	25.7322	62.8701	-63.9829	-79.4222	-94.8616
178.927	-1.31532e-07	0.0289649	-48.6757	-11.5048	25.6662	62.8371	-64.0754	-79.4751	-94.8748
180.074	-1.33443e-07	0.0290649	-48.8071	-11.6033	25.6005	62.8043	-64.1674	-79.5277	-94.888
181.224	-1.3536e-07	0.0291649	-48.9379	-11.7014	25.5351	62.7716	-64.2589	-79.58	-94.9011
182.379	-1.37283e-07	0.0292649	-49.068	-11.7989	25.4701	62.7391	-64.35	-79.6321	-94.9141
183.536	-1.39213e-07	0.0293649	-49.1974	-11.896	25.4054	62.7068	-64.4406	-79.6839	-94.9271
184.698	-1.41148e-07	0.0294649	-49.3261	-11.9926	25.341	62.6746	-64.5308	-79.7354	-94.94
185.863	-1.4309e-07	0.0295649	-49.4543	-12.0886	25.277	62.6426	-64.6205	-79.7867	-94.9529
187.031	-1.45037e-07	0.0296649	-49.5817	-12.1842	25.2133	62.6108	-64.7097	-79.8377	-94.9656
188.203	-1.46991e-07	0.0297649	-49.7086	-12.2793	25.1499	62.5791	-64.7985	-79.8884	-94.9784
197.712	-1.62838e-07	0.0305649	-50.7007	-13.0234	24.654	62.3313	-65.493	-80.2854	-95.0778
207.454	-1.79073e-07	0.0313649	-51.6544	-13.7386	24.1772	62.093	-66.1607	-80.667	-95.1734
217.429	-1.95697e-07	0.0321649	-52.5719	-14.4267	23.7185	61.8637	-66.803	-81.0341	-95.2653
227.637	-2.12708e-07	0.0329649	-53.4553	-15.0892	23.2769	61.643	-67.4214	-81.3876	-95.3537
238.077	-2.30108e-07	0.0337649	-54.3063	-15.7274	22.8515	61.4303	-68.0172	-81.7281	-95.4389
248.75	-2.47895e-07	0.0345649	-55.1268	-16.3428	22.4413	61.2253	-68.5915	-82.0563	-95.521
259.656	-2.66071e-07	0.0353649	-55.9183	-16.9364	22.0455	61.0274	-69.1456	-82.3729	-95.6003
270.795	-2.84635e-07	0.0361649	-56.6824	-17.5094	21.6635	60.8365	-69.6805	-82.6786	-95.6767
282.167	-3.03587e-07	0.0369649	-57.4205	-18.063	21.2945	60.652	-70.1972	-82.9739	-95.7505
293.772	-3.22927e-07	0.0377649	-58.1338	-18.598	20.9378	60.4737	-70.6965	-83.2592	-95.8219
305.609	-3.42656e-07	0.0385649	-58.8236	-19.1153	20.5929	60.3012	-71.1794	-83.5351	-95.8909
317.68	-3.62772e-07	0.0393649	-59.491	-19.6159	20.2592	60.1343	-71.6466	-83.8021	-95.9576
329.983	-3.83277e-07	0.0401649	-60.1372	-20.1005	19.9361	59.9728	-72.0989	-84.0606	-96.0222
342.519	-4.04169e-07	0.0409649	-60.7631	-20.5699	19.6232	59.8163	-72.537	-84.3109	-96.0848
355.288	-4.2545e-07	0.0417649	-61.3696	-21.0248	19.3199	59.6647	-72.9615	-84.5535	-96.1454
368.29	-4.47119e-07	0.0425649	-61.9576	-21.4659	19.0259	59.5176	-73.3731	-84.7887	-96.2042
373.226	-4.55345e-07	0.0428649	-62.1736	-21.6278	18.9179	59.4636	-73.5243	-84.875	-96.2258
378.195	-4.63625e-07	0.0431649	-62.387	-21.7879	18.8112	59.4102	-73.6737	-84.9604	-96.2471
383.196	-4.7196e-07	0.0434649	-62.5981	-21.9463	18.7056	59.3575	-73.8215	-85.0449	-96.2682
388.23	-4.8035e-07	0.0437649	-62.8069	-22.1028	18.6012	59.3053	-73.9676	-85.1283	-96.2891
393.296	-4.88794e-07	0.0440649	-63.0133	-22.2576	18.498	59.2536	-74.1121	-85.2109	-96.3097
398.396	-4.97293e-07	0.0443649	-63.2174	-22.4108	18.3959	59.2026	-74.255	-85.2925	-96.3301
403.528	-5.05846e-07	0.0446649	-63.4193	-22.5622	18.295	59.1521	-74.3963	-85.3733	-96.3503
408.693	-5.14454e-07	0.0449649	-63.619	-22.712	18.1951	59.1022	-74.5361	-85.4532	-96.3702
413.891	-5.23116e-07	0.0452649	-63.8166	-22.8601	18.0963	59.0528	-74.6744	-85.5322	-96.39
419.121	-5.31834e-07	0.0455649	-64.012	-23.0067	17.9986	59.0039	-74.8111	-85.6103	-96.4095

## Sheet: Fig. 7e KHetero
KHetero = 150				KHetero = 330				KHetero = 1000				KHetero = 3300				KHetero = 10000				KHetero = 330000				k1	KHomo	ee1	[Cattot]
eeP	eeL	β	α	eeP	eeL	β	α	eeP	eeL	β	α	eeP	eeL	β	α	eeP	eeL	β	α	eeP	eeL	β	α	10	33	1	0.11
1.2566e-07	1.46355e-06	0.000190698	0.0276187	0	0	0.000112147	0.0211799	5.56433e-07	2.82614e-07	4.52822e-05	0.0134584	0	0	1.51823e-05	0.00779289	1.00392e-06	6.89001e-08	5.2366e-06	0.00457672	1.21478e-06	9.8565e-09	1.65401e-07	0.000813391	k2	KHetero	ee2
0.0491398	0.572417	0.000190689	0.027619	0.153847	0.318405	0.000112144	0.0211802	0.335564	0.170445	4.52817e-05	0.0134587	0.600305	0.097853	1.51822e-05	0.00779319	0.919538	0.0631154	5.23658e-06	0.00457702	2.61266	0.0212073	1.65401e-07	0.000813691	10	var	-1
0.0694842	0.809527	0.000190681	0.0276193	0.21756	0.450298	0.000112142	0.0211805	0.474536	0.241049	4.52813e-05	0.013459	0.848912	0.138388	1.51821e-05	0.00779349	1.30032	0.0892615	5.23655e-06	0.00457732	3.69374	0.029995	1.654e-07	0.000813991	k2'
0.0850882	0.991474	0.000190673	0.0276196	0.26644	0.551507	0.00011214	0.0211808	0.581158	0.295228	4.52808e-05	0.0134593	1.03964	0.169494	1.5182e-05	0.00779379	1.59245	0.109326	5.23653e-06	0.00457762	4.52253	0.0367402	1.654e-07	0.000814291	0
0.109817	1.28001	0.000190656	0.0276202	0.343931	0.712009	0.000112136	0.0211814	0.750198	0.38115	4.52799e-05	0.0134599	1.34202	0.218825	1.51818e-05	0.00779439	2.05553	0.141148	5.23648e-06	0.00457822	5.83504	0.0474419	1.65399e-07	0.000814891
0.129899	1.51456	0.000190639	0.0276208	0.406896	0.842479	0.000112132	0.021182	0.88756	0.450997	4.52791e-05	0.0134605	1.58772	0.258929	1.51816e-05	0.00779499	2.43177	0.167019	5.23643e-06	0.00457882	6.89996	0.0561465	1.65398e-07	0.000815491
0.14725	1.71738	0.000190623	0.0276214	0.461321	0.955303	0.000112127	0.0211826	1.0063	0.511399	4.52782e-05	0.0134611	1.8001	0.293611	1.51814e-05	0.00779559	2.75695	0.189394	5.23638e-06	0.00457942	7.81911	0.0636782	1.65397e-07	0.000816091
0.172292	2.01048	0.000190595	0.0276224	0.539928	1.11835	0.00011212	0.0211836	1.17781	0.598689	4.52767e-05	0.0134621	2.10686	0.343735	1.51811e-05	0.00779659	3.22656	0.221733	5.2363e-06	0.00458042	9.14411	0.0745709	1.65395e-07	0.000817091
0.19409	2.266	0.000190568	0.0276234	0.608411	1.2605	0.000112113	0.0211846	1.32725	0.674795	4.52752e-05	0.0134631	2.37411	0.38744	1.51808e-05	0.00779759	3.63562	0.249933	5.23622e-06	0.00458142	10.2957	0.084077	1.65393e-07	0.000818091
0.21364	2.49553	0.00019054	0.0276244	0.669883	1.38818	0.000112106	0.0211856	1.46141	0.743162	4.52737e-05	0.0134641	2.61401	0.426703	1.51805e-05	0.00779859	4.00275	0.275269	5.23614e-06	0.00458242	11.3269	0.0926244	1.65392e-07	0.000819091
0.263559	3.08337	0.000190457	0.0276274	0.827106	1.71521	0.000112084	0.0211886	1.8046	0.918277	4.52692e-05	0.0134671	3.22764	0.527284	1.51796e-05	0.00780159	4.94144	0.340184	5.2359e-06	0.00458542	13.9519	0.114558	1.65387e-07	0.000822091
0.305199	3.57601	0.000190374	0.0276304	0.958593	1.9893	0.000112063	0.0211916	2.09171	1.06506	4.52648e-05	0.0134701	3.74088	0.611611	1.51786e-05	0.00780459	5.72612	0.394624	5.23566e-06	0.00458842	16.1315	0.132996	1.65382e-07	0.000825091
0.374301	4.3992	0.000190208	0.0276364	1.17763	2.44734	0.000112019	0.0211976	2.57023	1.3104	4.52559e-05	0.0134761	4.59598	0.752597	1.51767e-05	0.00781059	7.03238	0.485678	5.23517e-06	0.00459442	19.7241	0.16394	1.65371e-07	0.000831091
0.431867	5.09146	0.000190042	0.0276424	1.36105	2.83257	0.000111976	0.0212036	2.97123	1.5168	4.52469e-05	0.0134821	5.31223	0.871253	1.51748e-05	0.00781659	8.12528	0.56235	5.23469e-06	0.00460042	22.69	0.190118	1.65361e-07	0.000837091
0.482051	5.70069	0.000189876	0.0276484	1.5218	3.17164	0.000111933	0.0212096	3.32289	1.69851	4.5238e-05	0.0134881	5.94008	0.975758	1.5173e-05	0.00782259	9.08221	0.629914	5.2342e-06	0.00460642	25.2528	0.213293	1.65351e-07	0.000843091
0.52697	6.25121	0.00018971	0.0276544	1.66646	3.47807	0.00011189	0.0212156	3.63956	1.86278	4.52291e-05	0.0134941	6.50518	1.07027	1.51711e-05	0.00782859	9.94255	0.691048	5.23372e-06	0.00461242	27.5267	0.234357	1.65341e-07	0.000849091
0.567878	6.7574	0.000189544	0.0276604	1.7989	3.75986	0.000111847	0.0212216	3.92969	2.01387	4.52201e-05	0.0135001	7.02272	1.15723	1.51692e-05	0.00783459	10.7296	0.74733	5.23323e-06	0.00461842	29.58	0.253836	1.65331e-07	0.000855091
0.629244	7.52648	0.000189267	0.0276704	1.99902	4.18807	0.000111775	0.0212316	4.36848	2.24355	4.52052e-05	0.0135101	7.80494	1.28949	1.5166e-05	0.00784459	11.9173	0.832991	5.23242e-06	0.00462842	32.6262	0.283658	1.65314e-07	0.000865091
0.684066	8.22478	0.00018899	0.0276804	2.17945	4.57696	0.000111703	0.0212416	4.76455	2.45222	4.51903e-05	0.0135201	8.5105	1.40974	1.51629e-05	0.00785459	12.9867	0.910936	5.23161e-06	0.00463842	35.3107	0.310991	1.65297e-07	0.000875091
0.733821	8.86903	0.000188713	0.0276904	2.34474	4.93581	0.000111631	0.0212516	5.12784	2.64486	4.51754e-05	0.0135301	9.15716	1.52082	1.51597e-05	0.00786459	13.965	0.983003	5.2308e-06	0.00464842	37.7153	0.336445	1.6528e-07	0.000885091
0.779492	9.47027	0.000188436	0.0277004	2.49792	5.27078	0.000111558	0.0212616	5.46488	2.82476	4.51605e-05	0.0135401	9.75667	1.62462	1.51566e-05	0.00787459	14.8702	1.0504	5.22998e-06	0.00465842	39.8944	0.360418	1.65263e-07	0.000895091
0.898048	11.0837	0.000187604	0.0277304	2.90327	6.17001	0.000111342	0.0212916	6.35892	3.30808	4.51157e-05	0.0135701	11.3446	1.90385	1.51471e-05	0.00790459	17.2593	1.23202	5.22754e-06	0.00468842	45.4194	0.425892	1.65212e-07	0.000925091
0.996496	12.4953	0.000186771	0.0277604	3.2504	6.95726	0.000111125	0.0213216	7.12739	3.73175	4.50708e-05	0.0136001	12.7066	2.1491	1.51376e-05	0.00793459	19.2971	1.39194	5.22509e-06	0.00471842	49.8559	0.484697	1.65161e-07	0.000955091
1.08053	13.7673	0.000185938	0.0277904	3.55653	7.66712	0.000110909	0.0213516	7.80769	4.11426	4.50259e-05	0.0136301	13.9097	2.37093	1.51281e-05	0.00796459	21.0872	1.53695	5.22264e-06	0.00474842	53.5317	0.539037	1.6511e-07	0.000985091
1.21748	16.0227	0.000184269	0.0278504	4.08202	8.92683	0.000110474	0.0214116	8.98235	4.79427	4.49359e-05	0.0136901	15.9805	2.76642	1.51091e-05	0.00802459	24.1438	1.79643	5.21772e-06	0.00480842	59.3077	0.638868	1.65007e-07	0.00104509
1.32424	18.0114	0.000182598	0.0279104	4.52525	10.0389	0.000110039	0.0214716	9.98145	5.39609	4.48456e-05	0.0137501	17.7345	3.11773	1.50899e-05	0.00808459	26.7047	2.02803	5.21277e-06	0.00486842	63.6469	0.73097	1.64903e-07	0.00110509
1.40874	19.814	0.000180923	0.0279704	4.90923	11.0482	0.000109603	0.0215316	10.8547	5.94354	4.47551e-05	0.0138101	19.2613	3.43848	1.50707e-05	0.00814459	28.9101	2.24046	5.2078e-06	0.00492842	67.0121	0.818058	1.64799e-07	0.00116509
1.51227	22.5243	0.000178127	0.0280704	5.45236	12.568	0.000108874	0.0216316	12.1056	6.77056	4.46036e-05	0.0139101	21.4371	3.92532	1.50385e-05	0.00824459	32.0092	2.56484	5.19945e-06	0.00502842	71.1554	0.955987	1.64623e-07	0.00126509
1.5801	24.9698	0.000175322	0.0281704	5.90491	13.942	0.000108142	0.0217316	13.1664	7.52115	4.44514e-05	0.0140101	23.2704	4.36974	1.50061e-05	0.00834459	34.5749	2.86311	5.19105e-06	0.00512842	74.066	1.08815	1.64445e-07	0.00136509
1.6202	27.2221	0.000172509	0.0282704	6.28864	15.2098	0.000107409	0.0218316	14.0836	8.21641	4.42985e-05	0.0141101	24.846	4.78372	1.49735e-05	0.00844459	36.7415	3.14288	5.18257e-06	0.00522842	76.1544	1.21676	1.64265e-07	0.00146509
1.63783	29.326	0.000169689	0.0283704	6.61748	16.3963	0.000106672	0.0219316	14.887	8.86948	4.41449e-05	0.0142101	26.218	5.17472	1.49407e-05	0.00854459	38.5956	3.40888	5.17403e-06	0.00532842	77.6673	1.34311	1.64083e-07	0.00156509
1.63668	31.3114	0.000166861	0.0284704	6.90107	17.5181	0.000105933	0.0220316	15.597	9.4892	4.39906e-05	0.0143101	27.424	5.54774	1.49077e-05	0.00864459	40.1969	3.66426	5.16543e-06	0.00542842	78.7631	1.46806	1.63899e-07	0.00166509
1.61953	33.1999	0.000164025	0.0285704	7.14643	18.5871	0.000105192	0.0221316	16.2286	10.0818	4.38356e-05	0.0144101	28.4911	5.90629	1.48745e-05	0.00874459	41.589	3.91126	5.15675e-06	0.00552842	79.5482	1.59218	1.63713e-07	0.00176509
1.54535	36.7452	0.000158329	0.0287704	7.54261	20.5992	0.000103701	0.0223316	17.299	11.2032	4.35235e-05	0.0146101	30.2864	6.58984	1.48075e-05	0.00894459	43.8696	4.38622	5.13921e-06	0.00572842	80.4616	1.83951	1.63336e-07	0.00196509
1.4279	40.0502	0.000152602	0.0289704	7.8367	22.4814	0.000102201	0.0225316	18.1625	12.2593	4.32085e-05	0.0148101	31.7222	7.2398	1.47397e-05	0.00914459	45.6256	4.8428	5.1214e-06	0.00592842	80.7873	2.08728	1.6295e-07	0.00216509
1.27588	43.1709	0.000146843	0.0291704	8.04912	24.2647	0.000100691	0.0227316	18.8617	13.2665	4.28907e-05	0.0150101	32.8761	7.86527	1.4671e-05	0.00934459	46.9803	5.28666	5.10332e-06	0.00612842	80.7361	2.33677	1.62556e-07	0.00236509
1.09563	46.1455	0.000141053	0.0293704	8.19442	25.9701	9.91703e-05	0.0229316	19.4268	14.2357	4.25701e-05	0.0152101	33.8033	8.47241	1.46016e-05	0.00954459	48.0195	5.7216	5.08498e-06	0.00632842	80.4335	2.5888	1.62155e-07	0.00256509
0.89197	49.0012	0.000135231	0.0295704	8.28346	27.6125	9.76399e-05	0.0231316	19.8801	15.1748	4.22467e-05	0.0154101	34.544	9.06557	1.45313e-05	0.00974459	48.8057	6.15028	5.06637e-06	0.00652842	79.958	2.84392	1.61745e-07	0.00276509
0.668716	51.7585	0.000129378	0.0297704	8.32463	29.2033	9.60995e-05	0.0233316	20.2388	16.0898	4.19204e-05	0.0156101	35.1292	9.64798	1.44602e-05	0.00994459	49.3857	6.5747	5.0475e-06	0.00672842	79.3609	3.1025	1.61327e-07	0.00296509
0.30362	55.743	0.00012054	0.0300704	8.31091	31.5106	9.37702e-05	0.0236316	20.6281	17.4262	4.14257e-05	0.0159101	35.7669	10.5067	1.4352e-05	0.0102446	49.946	7.20648	5.01869e-06	0.00702842	78.3103	3.49746	1.60686e-07	0.00326509
-0.0906898	59.5799	0.000111631	0.0303704	8.22179	33.7422	9.14184e-05	0.0239316	20.8696	18.7292	4.09246e-05	0.0162101	36.1703	11.3527	1.4242e-05	0.0105446	50.2135	7.83565	4.98928e-06	0.00732842	77.138	3.90147	1.60026e-07	0.00356509
-0.507999	63.2979	0.000102651	0.0306704	8.07059	35.9136	8.90441e-05	0.0242316	20.9899	20.0069	4.04172e-05	0.0165101	36.3857	12.1906	1.41301e-05	0.0108446	50.2538	8.46485	4.95927e-06	0.00762842	75.8905	4.31495	1.59348e-07	0.00386509
-0.943442	66.9187	9.36005e-05	0.0309704	7.86772	38.0368	8.66473e-05	0.0245316	21.0095	21.2653	3.99034e-05	0.0168101	36.4482	13.0236	1.40164e-05	0.0111446	50.1155	9.09604	4.92867e-06	0.00792842	74.5971	4.73821	1.58653e-07	0.00416509
-1.39314	70.4589	8.44793e-05	0.0312704	7.62148	40.1208	8.42281e-05	0.0248316	20.9446	22.5093	3.93833e-05	0.0171101	36.3851	13.8543	1.39009e-05	0.0114446	49.8355	9.73071	4.89747e-06	0.00822842	73.2772	5.17146	1.57939e-07	0.00446509
-1.85397	73.9319	7.52873e-05	0.0315704	7.3386	42.1728	8.17863e-05	0.0251316	20.8083	23.7424	3.88568e-05	0.0174101	36.2182	14.6845	1.37835e-05	0.0117446	49.4422	10.37	4.86567e-06	0.00852842	71.9437	5.61486	1.57208e-07	0.00476509
-2.32337	77.3483	6.60247e-05	0.0318704	7.02465	44.1986	7.9322e-05	0.0254316	20.6114	24.9676	3.83239e-05	0.0177101	35.9649	15.5159	1.36643e-05	0.0120446	48.9575	11.0148	4.83327e-06	0.00882842	70.6055	6.06854	1.56458e-07	0.00506509
-2.79923	80.7167	5.66913e-05	0.0321704	6.68424	46.203	7.68352e-05	0.0257316	20.3627	26.1874	3.77847e-05	0.0180101	35.6392	16.3498	1.35433e-05	0.0123446	48.3992	11.6659	4.80028e-06	0.00912842	69.2688	6.53257	1.5569e-07	0.00536509
-3.2798	84.0446	4.72872e-05	0.0324704	6.32127	48.1898	7.43259e-05	0.0260316	20.0697	27.4037	3.72392e-05	0.0183101	35.2528	17.1872	1.34204e-05	0.0126446	47.7811	12.3239	4.76668e-06	0.00942842	67.9382	7.00704	1.54905e-07	0.00566509
-3.76361	87.3379	3.78124e-05	0.0327704	5.93906	50.1625	7.17941e-05	0.0263316	19.7385	28.6181	3.66872e-05	0.0186101	34.8153	18.029	1.32957e-05	0.0129446	47.1147	12.9892	4.73249e-06	0.00972842	66.6167	7.492	1.54101e-07	0.00596509
-4.24945	90.6018	2.82669e-05	0.0330704	5.54043	52.1236	6.92398e-05	0.0266316	19.3745	29.8321	3.61289e-05	0.0189101	34.3347	18.8759	1.31691e-05	0.0132446	46.4091	13.6624	4.6977e-06	0.0100284	65.3067	7.98749	1.5328e-07	0.00626509
-4.73627	93.8409	1.86507e-05	0.0333704	5.12782	54.0758	6.6663e-05	0.0269316	18.9821	31.0469	3.55643e-05	0.0192101	33.8179	19.7285	1.30407e-05	0.0135446	45.6718	14.3436	4.66232e-06	0.0103284	64.0096	8.49356	1.5244e-07	0.00656509
-5.2232	97.0588	8.96374e-06	0.0336704	4.70331	56.0209	6.40637e-05	0.0272316	18.5655	32.2636	3.49932e-05	0.0195101	33.2705	20.5874	1.29105e-05	0.0138446	44.9093	15.0332	4.62633e-06	0.0106284	62.7268	9.01024	1.51582e-07	0.00686509
-5.70952	100.259	-7.93911e-07	0.0339704	4.26874	57.9609	6.14419e-05	0.0275316	18.1278	33.4829	3.44159e-05	0.0198101	32.6973	21.4531	1.27784e-05	0.0141446	44.1265	15.7316	4.58975e-06	0.0109284	61.459	9.53754	1.50707e-07	0.00716509
-6.19458	103.444	-1.06223e-05	0.0342704	3.8257	59.8972	5.87976e-05	0.0278316	17.672	34.7057	3.38321e-05	0.0201101	32.1026	22.3258	1.26445e-05	0.0144446	43.3279	16.4388	4.55257e-06	0.0112284	60.2068	10.0755	1.49813e-07	0.00746509
-6.67787	106.617	-2.05214e-05	0.0345704	3.37558	61.8312	5.61308e-05	0.0281316	17.2007	35.9326	3.3242e-05	0.0204101	31.4899	23.2061	1.25088e-05	0.0147446	42.5171	17.1551	4.51479e-06	0.0115284	58.9705	10.6241	1.48901e-07	0.00776509
-7.15893	109.78	-3.04912e-05	0.0348704	2.91959	63.7642	5.34415e-05	0.0284316	16.7162	37.1644	3.26456e-05	0.0207101	30.8622	24.0941	1.23712e-05	0.0150446	41.6971	17.8806	4.47641e-06	0.0118284	57.7503	11.1834	1.47972e-07	0.00806509
-7.63738	112.935	-4.05317e-05	0.0351704	2.45882	65.6973	5.07297e-05	0.0287316	16.2203	38.4014	3.20428e-05	0.0210101	30.2222	24.9902	1.22318e-05	0.0153446	40.8704	18.6156	4.43744e-06	0.0121284	56.5464	11.7534	1.47024e-07	0.00836509
-8.42816	118.181	-5.7423e-05	0.0356704	1.68274	68.9216	4.616e-05	0.0292316	15.3732	40.4762	3.10239e-05	0.0215101	29.1341	26.5021	1.19954e-05	0.0158446	39.4837	19.8616	4.37115e-06	0.0126284	54.5759	12.7272	1.45405e-07	0.00886509
-9.20963	123.416	-7.45108e-05	0.0361704	0.899673	72.1526	4.15278e-05	0.0297316	14.5062	42.5688	2.99874e-05	0.0220101	28.0269	28.0381	1.17538e-05	0.0163446	38.0926	21.1347	4.30321e-06	0.0131284	52.6502	13.7308	1.43735e-07	0.00936509
-9.98089	128.648	-9.1795e-05	0.0366704	0.112663	75.3935	3.68332e-05	0.0302316	13.6246	44.681	2.89333e-05	0.0225101	26.9073	29.5987	1.15072e-05	0.0168446	36.7034	22.435	4.2336e-06	0.0136284	50.7687	14.7642	1.42016e-07	0.00986509
-10.7413	133.881	-0.000109276	0.0371704	-0.675794	78.647	3.2076e-05	0.0307316	12.7332	46.814	2.78615e-05	0.0230101	25.7812	31.1849	1.12555e-05	0.0173446	35.3207	23.7631	4.16233e-06	0.0141284	48.9304	15.8274	1.40247e-07	0.0103651
-11.4904	139.12	-0.000126953	0.0376704	-1.46365	81.9155	2.72563e-05	0.0312316	11.8355	48.9691	2.6772e-05	0.0235101	24.6528	32.797	1.09986e-05	0.0178446	33.9482	25.1192	4.0894e-06	0.0146284	47.1343	16.9205	1.38427e-07	0.0108651
-12.2279	144.369	-0.000144826	0.0381704	-2.24921	85.2012	2.23742e-05	0.0317316	10.9346	51.1471	2.56648e-05	0.0240101	23.5258	34.4355	1.07367e-05	0.0183446	32.5887	26.5034	4.01481e-06	0.0151284	45.3794	18.0435	1.36558e-07	0.0113651
-12.9536	149.632	-0.000162896	0.0386704	-3.03109	88.5057	1.74295e-05	0.0322316	10.0331	53.349	2.454e-05	0.0245101	22.403	36.101	1.04696e-05	0.0188446	31.2442	27.9162	3.93856e-06	0.0156284	43.6646	19.1964	1.34638e-07	0.0118651
-13.6674	154.91	-0.000181162	0.0391704	-3.80815	91.8307	1.24223e-05	0.0327316	9.13309	55.5755	2.33975e-05	0.0250101	21.2868	37.7937	1.01975e-05	0.0193446	29.9165	29.3575	3.86064e-06	0.0161284	41.9887	20.3793	1.32669e-07	0.0123651
-14.3693	160.208	-0.000199625	0.0396704	-4.57945	95.1774	7.35268e-06	0.0332316	8.23628	57.8273	2.22374e-05	0.0255101	20.179	39.5139	9.92024e-06	0.0198446	28.6065	30.8277	3.78107e-06	0.0166284	40.3506	21.592	1.30649e-07	0.0128651
-15.0592	165.527	-0.000218284	0.0401704	-5.34424	98.5472	2.22051e-06	0.0337316	7.34411	60.1049	2.10595e-05	0.0260101	19.0811	41.262	9.63789e-06	0.0203446	27.3153	32.3267	3.69983e-06	0.0171284	38.7491	22.8347	1.2858e-07	0.0133651
-15.7374	170.869	-0.00023714	0.0406704	-6.10188	101.941	-2.97415e-06	0.0342316	6.45777	62.4089	1.9864e-05	0.0265101	17.9942	43.0382	9.35044e-06	0.0208446	26.0433	33.8548	3.61694e-06	0.0176284	37.1831	24.1073	1.2646e-07	0.0138651
-16.4038	176.236	-0.000256192	0.0411704	-6.85187	105.36	-8.23132e-06	0.0347316	5.57822	64.7396	1.86509e-05	0.0270101	16.9194	44.8426	9.05788e-06	0.0213446	24.791	35.4121	3.53238e-06	0.0181284	35.6516	25.4099	1.24291e-07	0.0143651
-17.0587	181.63	-0.00027544	0.0416704	-7.59382	108.805	-1.3551e-05	0.0352316	4.70628	67.0976	1.74201e-05	0.0275101	15.8572	46.6756	8.76022e-06	0.0218446	23.5586	36.9985	3.44616e-06	0.0186284	34.1535	26.7424	1.22071e-07	0.0148651
-17.7022	187.052	-0.000294885	0.0421704	-8.3274	112.277	-1.89331e-05	0.0357316	3.84259	69.4831	1.61716e-05	0.0280101	14.8082	48.5372	8.45747e-06	0.0223446	22.3461	38.6143	3.35828e-06	0.0191284	32.6877	28.1049	1.19802e-07	0.0153651
-18.3345	192.504	-0.000314527	0.0426704	-9.05238	115.776	-2.43778e-05	0.0362316	2.98769	71.8965	1.49054e-05	0.0285101	13.773	50.4275	8.1496e-06	0.0228446	21.1537	40.2595	3.26874e-06	0.0196284	31.2533	29.4973	1.17482e-07	0.0158651
-18.9558	197.986	-0.000334364	0.0431704	-9.76857	119.303	-2.9885e-05	0.0367316	2.142	74.338	1.36216e-05	0.0290101	12.7517	52.3468	7.83664e-06	0.0233446	19.9812	41.9341	3.17754e-06	0.0201284	29.8494	30.9197	1.15112e-07	0.0163651
-19.5663	203.501	-0.000354399	0.0436704	-10.4758	122.858	-3.54546e-05	0.0372316	1.30584	76.8081	1.23201e-05	0.0295101	11.7445	54.2952	7.51858e-06	0.0238446	18.8285	43.6383	3.08468e-06	0.0206284	28.4749	32.3721	1.12693e-07	0.0168651
-20.1662	209.048	-0.000374629	0.0441704	-11.1741	126.443	-4.10868e-05	0.0377316	0.479487	79.3068	1.1001e-05	0.0300101	10.7516	56.2727	7.19541e-06	0.0243446	17.6953	45.372	2.99016e-06	0.0211284	27.1291	33.8545	1.10223e-07	0.0173651
-20.7557	214.63	-0.000395056	0.0446704	-11.8633	130.058	-4.67815e-05	0.0382316	-0.336876	81.8344	9.66419e-06	0.0305101	9.7731	58.2795	6.86714e-06	0.0248446	16.5814	47.1353	2.89398e-06	0.0216284	25.811	35.3668	1.07704e-07	0.0178651
-21.3351	220.246	-0.00041568	0.0451704	-12.5434	133.702	-5.25386e-05	0.0387316	-1.14311	84.3912	8.30971e-06	0.0310101	8.8089	60.3156	6.53377e-06	0.0253446	15.4866	48.9282	2.79613e-06	0.0221284	24.5198	36.9091	1.05134e-07	0.0183651
-21.9046	225.897	-0.0004365	0.0456704	-13.2144	137.377	-5.83583e-05	0.0392316	-1.93911	86.9772	6.93756e-06	0.0315101	7.85898	62.3812	6.1953e-06	0.0258446	14.4105	50.7509	2.69663e-06	0.0226284	23.2547	38.4814	1.02515e-07	0.0188651
-22.4644	231.585	-0.000457516	0.0461704	-13.8764	141.083	-6.42405e-05	0.0397316	-2.72484	89.5927	5.54775e-06	0.0320101	6.92328	64.4763	5.85172e-06	0.0263446	13.3528	52.6033	2.59546e-06	0.0231284	22.0149	40.0837	9.98449e-08	0.0193651
-23.0147	237.31	-0.000478729	0.0466704	-14.5294	144.82	-7.01851e-05	0.0402316	-3.50027	92.2378	4.14027e-06	0.0325101	6.00168	66.601	5.50305e-06	0.0268446	12.3133	54.4854	2.49263e-06	0.0236284	20.7997	41.7159	9.71253e-08	0.0198651
-23.5557	243.072	-0.000500138	0.0471704	-15.1734	148.588	-7.61923e-05	0.0407316	-4.26542	94.9127	2.71513e-06	0.0330101	5.09404	68.7553	5.14927e-06	0.0273446	11.2914	56.3973	2.38814e-06	0.0241284	19.6085	43.3782	9.43556e-08	0.0203651
-24.0877	248.873	-0.000521744	0.0476704	-15.8086	152.388	-8.2262e-05	0.0412316	-5.0203	97.6174	1.27232e-06	0.0335101	4.20021	70.9393	4.79039e-06	0.0278446	10.287	58.3391	2.28199e-06	0.0246284	18.4404	45.0704	9.1536e-08	0.0208651
-24.6108	254.712	-0.000543546	0.0481704	-16.435	156.22	-8.83941e-05	0.0417316	-5.76499	100.352	-1.88153e-07	0.0340101	3.32002	73.1531	4.4264e-06	0.0283446	9.29967	60.3106	2.17418e-06	0.0251284	17.2948	46.7926	8.86663e-08	0.0213651
-25.1253	260.59	-0.000565544	0.0486704	-17.0527	160.084	-9.45888e-05	0.0422316	-6.49954	103.117	-1.66629e-06	0.0345101	2.45327	75.3967	4.05732e-06	0.0288446	8.32902	62.312	2.06471e-06	0.0256284	16.1711	48.5449	8.57467e-08	0.0218651
-25.6313	266.507	-0.000587739	0.0491704	-17.6619	163.981	-0.000100846	0.0427316	-7.22405	105.912	-3.1621e-06	0.0350101	1.59977	77.6701	3.68313e-06	0.0293446	7.37474	64.3433	1.95358e-06	0.0261284	15.0687	50.3271	8.2777e-08	0.0223651
-26.1291	272.465	-0.00061013	0.0496704	-18.2625	167.911	-0.000107166	0.0432316	-7.9386	108.737	-4.67557e-06	0.0355101	0.759313	79.9734	3.30384e-06	0.0298446	6.43647	66.4046	1.84079e-06	0.0266284	13.987	52.1393	7.97573e-08	0.0228651
-26.6189	278.463	-0.000632718	0.0501704	-18.8549	171.873	-0.000113548	0.0437316	-8.64332	111.593	-6.20671e-06	0.0360101	-0.0683059	82.3067	2.91945e-06	0.0303446	5.51387	68.4957	1.72633e-06	0.0271284	12.9254	53.9815	7.66876e-08	0.0233651
-27.1008	284.501	-0.000655502	0.0506704	-19.439	175.869	-0.000119992	0.0442316	-9.33831	114.48	-7.75552e-06	0.0365101	-0.883305	84.6699	2.52996e-06	0.0308446	4.60659	70.6167	1.61022e-06	0.0276284	11.8834	55.8537	7.35679e-08	0.0238651
-27.575	290.581	-0.000678483	0.0511704	-20.015	179.897	-0.0001265	0.0447316	-10.0237	117.396	-9.32199e-06	0.0370101	-1.6859	87.0631	2.13536e-06	0.0313446	3.71431	72.7677	1.49244e-06	0.0281284	10.8604	57.7558	7.03982e-08	0.0243651
-28.0417	296.702	-0.00070166	0.0516704	-20.583	183.96	-0.000133069	0.0452316	-10.6996	120.344	-1.09061e-05	0.0375101	-2.47632	89.4864	1.73566e-06	0.0318446	2.8367	74.9487	1.373e-06	0.0286284	9.85586	59.688	6.71784e-08	0.0248651
-28.5011	302.864	-0.000725033	0.0521704	-21.1431	188.055	-0.000139701	0.0457316	-11.3662	123.322	-1.25079e-05	0.0380101	-3.25477	91.9397	1.33086e-06	0.0323446	1.97342	77.1596	1.25191e-06	0.0291284	8.86936	61.6502	6.39087e-08	0.0253651
-28.9534	309.069	-0.000748603	0.0526704	-21.6956	192.185	-0.000146396	0.0462316	-12.0235	126.331	-1.41274e-05	0.0385101	-4.02148	94.4231	9.20963e-07	0.0328446	1.12416	79.4005	1.12915e-06	0.0296284	7.9004	63.6424	6.0589e-08	0.0258651
-29.3987	315.316	-0.00077237	0.0531704	-21.8051	193.015	-0.000147743	0.0463316	-12.6718	129.371	-1.57645e-05	0.0390101	-4.17344	94.9234	8.3837e-07	0.0329446	0.28861	81.6714	1.00473e-06	0.0301284	6.94851	65.6645	5.72192e-08	0.0263651
-29.8371	321.605	-0.000796332	0.0536704	-21.9144	193.846	-0.000149091	0.0464316	-13.3112	132.442	-1.74193e-05	0.0395101	-4.32493	95.4249	7.55573e-07	0.0330446	-0.533535	83.9723	8.78647e-07	0.0306284	6.01326	67.7167	5.37994e-08	0.0268651
-30.2689	327.937	-0.000820492	0.0541704	-22.0233	194.679	-0.000150443	0.0465316	-13.9417	135.543	-1.90918e-05	0.0400101	-4.47597	95.9276	6.72573e-07	0.0331446	-1.34257	86.3032	7.50905e-07	0.0311284	5.0942	69.7989	5.03297e-08	0.0273651
-30.6942	334.312	-0.000844847	0.0546704	-22.132	195.513	-0.000151797	0.0466316	-14.5636	138.676	-2.07819e-05	0.0405101	-4.62655	96.4315	5.89368e-07	0.0332446	-2.1388	88.6642	6.21502e-07	0.0316284	4.19093	71.911	4.68099e-08	0.0278651
-31.1131	340.73	-0.000869399	0.0551704	-22.2404	196.348	-0.000153153	0.0467316	-15.1771	141.839	-2.24897e-05	0.0410101	-4.77667	96.9366	5.05959e-07	0.0333446	-2.92249	91.0552	4.90438e-07	0.0321284	3.30304	74.0532	4.32401e-08	0.0283651
-31.5257	347.192	-0.000894148	0.0556704	-22.3484	197.185	-0.000154512	0.0468316	-15.7821	145.034	-2.42152e-05	0.0415101	-4.92635	97.4429	4.22346e-07	0.0334446	-3.69393	93.4762	3.57713e-07	0.0326284	2.43014	76.2253	3.96203e-08	0.0288651
-31.9323	353.697	-0.000919093	0.0561704	-22.4562	198.023	-0.000155874	0.0469316	-16.3789	148.26	-2.59583e-05	0.0420101	-5.07557	97.9505	3.38529e-07	0.0335446	-4.45338	95.9272	2.23327e-07	0.0331284	1.57186	78.4275	3.59504e-08	0.0293651
-32.333	360.246	-0.000944234	0.0566704	-22.5637	198.862	-0.000157238	0.0470316	-16.9677	151.517	-2.77191e-05	0.0425101	-5.22435	98.4592	2.54508e-07	0.0336446	-5.20112	98.4084	8.72807e-08	0.0336284	0.727833	80.6597	3.22306e-08	0.0298651
-32.7278	366.838	-0.000969572	0.0571704	-22.6708	199.703	-0.000158604	0.0471316	-17.5485	154.805	-2.94976e-05	0.0430101	-5.37268	98.9691	1.70283e-07	0.0337446	-5.9374	100.92	-5.0427e-08	0.0341284	-0.102292	82.9218	2.84608e-08	0.0303651
-33.117	373.475	-0.000995106	0.0576704	-22.7777	200.545	-0.000159973	0.0472316	-18.1215	158.124	-3.12937e-05	0.0435101	-5.52056	99.4803	8.58535e-08	0.0338446	-6.66246	103.461	-1.89796e-07	0.0346284	-0.918855	85.214	2.46409e-08	0.0308651
-33.5006	380.156	-0.00102084	0.0581704	-22.8843	201.389	-0.000161344	0.0473316	-18.6868	161.475	-3.31075e-05	0.0440101	-5.668	99.9926	1.22019e-09	0.0339446	-7.37656	106.032	-3.30825e-07	0.0351284	-1.72218	87.5362	2.07711e-08	0.0313651
-33.8787	386.881	-0.00104676	0.0586704	-22.9906	202.234	-0.000162718	0.0474316	-19.2446	164.857	-3.4939e-05	0.0445101	-5.815	100.506	-8.36173e-08	0.0340446	-8.07993	108.634	-4.73516e-07	0.0356284	-2.5126	89.8883	1.68512e-08	0.0318651
-34.2515	393.651	-0.00107289	0.0591704	-23.0966	203.08	-0.000164095	0.0475316	-19.795	168.27	-3.67881e-05	0.0450101	-5.96156	101.021	-1.68659e-07	0.0341446	-8.77281	111.265	-6.17867e-07	0.0361284	-3.29041	92.2705	1.28813e-08	0.0323651
-34.6192	400.465	-0.00109921	0.0596704	-23.2023	203.928	-0.000165474	0.0476316	-20.3382	171.715	-3.86549e-05	0.0455101	-6.10768	101.537	-2.53904e-07	0.0342446	-9.45542	113.927	-7.6388e-07	0.0366284	-4.05591	94.6827	8.86143e-09	0.0328651
-34.9817	407.324	-0.00112572	0.0601704	-23.3077	204.777	-0.000166855	0.0477316	-20.8741	175.191	-4.05393e-05	0.0460101	-6.25336	102.054	-3.39354e-07	0.0343446	-10.128	116.618	-9.11553e-07	0.0371284	-4.80939	97.1248	4.79153e-09	0.0333651
-35.3392	414.228	-0.00115244	0.0606704	-23.4128	205.627	-0.000168239	0.0478316	-21.4031	178.698	-4.24415e-05	0.0465101	-6.39861	102.572	-4.25008e-07	0.0344446	-10.7907	119.34	-1.06089e-06	0.0376284	-5.55113	99.597	6.71619e-10	0.0338651
-35.6919	421.177	-0.00117935	0.0611704	-23.5177	206.479	-0.000169625	0.0479316	-21.9252	182.237	-4.43612e-05	0.0470101	-6.54342	103.092	-5.10866e-07	0.0345446	-11.4438	122.092	-1.21188e-06	0.0381284	-6.28141	102.099	-3.4983e-09	0.0343651
-36.0398	428.171	-0.00120645	0.0616704	-23.6222	207.332	-0.000171014	0.0480316	-22.4405	185.807	-4.62987e-05	0.0475101	-6.68781	103.613	-5.96928e-07	0.0346446	-12.0875	124.874	-1.36454e-06	0.0386284	-7.00049	104.631	-7.71823e-09	0.0348651
-36.383	435.21	-0.00123375	0.0621704	-23.7265	208.187	-0.000172406	0.0481316	-22.9492	189.409	-4.82538e-05	0.0480101	-6.83176	104.135	-6.83194e-07	0.0347446	-12.7219	127.686	-1.51886e-06	0.0391284	-7.70862	107.194	-1.19882e-08	0.0353651
-36.7216	442.295	-0.00126125	0.0626704	-23.8305	209.043	-0.0001738	0.0482316	-23.4514	193.042	-5.02266e-05	0.0485101	-6.97528	104.658	-7.69664e-07	0.0348446	-13.3473	130.528	-1.67483e-06	0.0396284	-8.40605	109.786	-1.63081e-08	0.0358651
-37.0557	449.424	-0.00128895	0.0631704	-23.9342	209.9	-0.000175196	0.0483316	-23.9471	196.706	-5.22171e-05	0.0490101	-7.11838	105.182	-8.56338e-07	0.0349446	-13.9639	133.4	-1.83247e-06	0.0401284	-9.09302	112.408	-2.06781e-08	0.0363651
-37.3855	456.599	-0.00131684	0.0636704	-24.0376	210.758	-0.000176595	0.0484316	-24.4365	200.402	-5.42252e-05	0.0495101	-7.26106	105.708	-9.43216e-07	0.0350446	-14.5718	136.303	-1.99177e-06	0.0406284	-9.76977	115.06	-2.5098e-08	0.0368651
-37.7109	463.82	-0.00134493	0.0641704	-24.1407	211.618	-0.000177997	0.0485316	-24.9198	204.13	-5.6251e-05	0.0500101	-7.40331	106.235	-1.0303e-06	0.0351446	-15.1712	139.235	-2.15274e-06	0.0411284	-10.4365	117.742	-2.9568e-08	0.0373651
-38.0321	471.087	-0.00137321	0.0646704	-24.2436	212.48	-0.000179401	0.0486316	-25.397	207.889	-5.82944e-05	0.0505101	-7.54514	106.763	-1.11758e-06	0.0352446	-15.7623	142.198	-2.31536e-06	0.0416284	-11.0935	120.454	-3.4088e-08	0.0378651
-38.3492	478.399	-0.00140169	0.0651704	-24.3461	213.342	-0.000180807	0.0487316	-25.8682	211.68	-6.03555e-05	0.0510101	-7.68655	107.292	-1.20508e-06	0.0353446	-16.3453	145.191	-2.47964e-06	0.0421284	-11.7409	123.197	-3.8658e-08	0.0383651
-38.6622	485.756	-0.00143037	0.0656704	-24.4484	214.207	-0.000182216	0.0488316	-26.3336	215.503	-6.24343e-05	0.0515101	-7.82754	107.823	-1.29277e-06	0.0354446	-16.9203	148.214	-2.64558e-06	0.0426284	-12.3789	125.969	-4.3278e-08	0.0388651
-38.9713	493.16	-0.00145924	0.0661704	-24.5504	215.072	-0.000183627	0.0489316	-26.7932	219.357	-6.45308e-05	0.0520101	-7.96811	108.354	-1.38067e-06	0.0355446	-17.4875	151.267	-2.81319e-06	0.0431284	-13.0078	128.771	-4.7948e-08	0.0393651
-39.2764	500.61	-0.00148831	0.0666704	-24.6522	215.939	-0.000185041	0.0490316	-27.2471	223.242	-6.66449e-05	0.0525101	-8.10827	108.887	-1.46877e-06	0.0356446	-18.047	154.35	-2.98246e-06	0.0436284	-13.6277	131.603	-5.26681e-08	0.0398651
-39.5778	508.105	-0.00151758	0.0671704	-24.7536	216.807	-0.000186458	0.0491316	-27.6955	227.16	-6.87767e-05	0.0530101	-8.24802	109.421	-1.55708e-06	0.0357446	-18.599	157.463	-3.15338e-06	0.0441284	-14.2389	134.465	-5.74381e-08	0.0403651
-39.8753	515.647	-0.00154704	0.0676704	-24.8548	217.677	-0.000187877	0.0492316	-28.1384	231.109	-7.09261e-05	0.0535101	-8.38735	109.957	-1.64559e-06	0.0358446	-19.1437	160.607	-3.32597e-06	0.0446284	-14.8415	137.358	-6.22582e-08	0.0408651
-39.9344	517.161	-0.00155296	0.0677704	-24.9557	218.548	-0.000189298	0.0493316	-28.2264	231.902	-7.13581e-05	0.0536101	-8.52628	110.493	-1.7343e-06	0.0359446	-19.2517	161.239	-3.36069e-06	0.0447284	-14.961	137.94	-6.32282e-08	0.0409651
-39.9933	518.676	-0.00155888	0.0678704	-25.0564	219.42	-0.000190722	0.0494316	-28.3141	232.697	-7.17908e-05	0.0537101	-8.66479	111.031	-1.82322e-06	0.0360446	-19.3595	161.873	-3.39547e-06	0.0448284	-15.0801	138.523	-6.42002e-08	0.0410651
-40.0521	520.194	-0.00156481	0.0679704	-25.1567	220.294	-0.000192148	0.0495316	-28.4016	233.493	-7.22243e-05	0.0538101	-8.8029	111.57	-1.91235e-06	0.0361446	-19.467	162.507	-3.43032e-06	0.0449284	-15.199	139.107	-6.51742e-08	0.0411651
-40.5172	532.401	-0.00161255	0.0687704	-25.95	227.334	-0.00020365	0.0503316	-29.0941	239.908	-7.57171e-05	0.0546101	-9.89333	115.925	-2.63268e-06	0.0369446	-20.3167	167.629	-3.71151e-06	0.0457284	-16.1378	143.826	-7.30383e-08	0.0419651
-40.9732	544.726	-0.00166079	0.0695704	-26.7264	234.463	-0.000215311	0.0511316	-29.7734	246.403	-7.92551e-05	0.0554101	-10.9586	120.357	-3.36607e-06	0.0377446	-21.1487	172.827	-3.99695e-06	0.0465284	-17.056	148.622	-8.10304e-08	0.0427651
-41.4206	557.17	-0.00170953	0.0703704	-27.4864	241.681	-0.000227133	0.0519316	-30.4399	252.98	-8.28384e-05	0.0562101	-11.9996	124.867	-4.11253e-06	0.0385446	-21.9636	178.102	-4.28665e-06	0.0473284	-17.9544	153.494	-8.91506e-08	0.0435651
-41.8594	569.732	-0.00175878	0.0711704	-28.2305	248.988	-0.000239114	0.0527316	-31.0938	259.638	-8.64669e-05	0.0570101	-13.017	129.455	-4.87204e-06	0.0393446	-22.7618	183.455	-4.58059e-06	0.0481284	-18.8335	158.443	-9.73988e-08	0.0443651
-42.2899	582.414	-0.00180853	0.0719704	-28.9592	256.385	-0.000251256	0.0535316	-31.7356	266.377	-9.01406e-05	0.0578101	-14.0116	134.12	-5.64462e-06	0.0401446	-23.5439	188.885	-4.87879e-06	0.0489284	-19.694	163.469	-1.05775e-07	0.0451651
-42.7125	595.214	-0.00185878	0.0727704	-29.6728	263.872	-0.000263557	0.0543316	-32.3656	273.198	-9.38596e-05	0.0586101	-14.9841	138.863	-6.43026e-06	0.0409446	-24.3104	194.392	-5.18124e-06	0.0497284	-20.5364	168.572	-1.14279e-07	0.0459651
-43.1273	608.134	-0.00190953	0.0735704	-30.3719	271.449	-0.000276019	0.0551316	-32.984	280.1	-9.76237e-05	0.0594101	-15.9352	143.684	-7.22896e-06	0.0417446	-25.0617	199.976	-5.48794e-06	0.0505284	-21.3613	173.752	-1.22911e-07	0.0467651
-43.5345	621.174	-0.00196079	0.0743704	-31.0569	279.117	-0.00028864	0.0559316	-33.5912	287.083	-0.000101433	0.0602101	-16.8655	148.582	-8.04072e-06	0.0425446	-25.7982	205.638	-5.7989e-06	0.0513284	-22.1693	179.008	-1.31672e-07	0.0475651
-43.9344	634.333	-0.00201255	0.0751704	-31.728	286.875	-0.000301422	0.0567316	-34.1876	294.147	-0.000105288	0.0610101	-17.7757	153.558	-8.86554e-06	0.0433446	-26.5204	211.377	-6.1141e-06	0.0521284	-22.9609	184.341	-1.4056e-07	0.0483651
-44.3272	647.611	-0.00206482	0.0759704	-32.3858	294.724	-0.000314363	0.0575316	-34.7732	301.293	-0.000109188	0.0618101	-18.6664	158.612	-9.70342e-06	0.0441446	-27.2287	217.193	-6.43356e-06	0.0529284	-23.7365	189.751	-1.49576e-07	0.0491651
-44.713	661.01	-0.00211758	0.0767704	-33.0307	302.664	-0.000327465	0.0583316	-35.3486	308.521	-0.000113133	0.0626101	-19.5382	163.744	-1.05544e-05	0.0449446	-27.9236	223.086	-6.75727e-06	0.0537284	-24.4967	195.238	-1.58721e-07	0.0499651
-45.0921	674.529	-0.00217085	0.0775704	-33.6629	310.695	-0.000340726	0.0591316	-35.9138	315.829	-0.000117123	0.0634101	-20.3917	168.954	-1.14184e-05	0.0457446	-28.6052	229.056	-7.08524e-06	0.0545284	-25.2418	200.802	-1.67993e-07	0.0507651
-45.4646	688.168	-0.00222462	0.0783704	-34.2829	318.817	-0.000354147	0.0599316	-36.4693	323.22	-0.000121158	0.0642101	-21.2274	174.242	-1.22954e-05	0.0465446	-29.2742	235.104	-7.41745e-06	0.0553284	-25.9724	206.442	-1.77394e-07	0.0515651
-45.8307	701.927	-0.0022789	0.0791704	-34.891	327.031	-0.000367729	0.0607316	-37.0151	330.691	-0.000125239	0.0650101	-22.0459	179.608	-1.31856e-05	0.0473446	-29.9307	241.229	-7.75392e-06	0.0561284	-26.6888	212.16	-1.86922e-07	0.0523651
-46.1905	715.806	-0.00233367	0.0799704	-35.4875	335.336	-0.00038147	0.0615316	-37.5517	338.245	-0.000129365	0.0658101	-22.8476	185.051	-1.40888e-05	0.0481446	-30.5751	247.431	-8.09464e-06	0.0569284	-27.3916	217.954	-1.96579e-07	0.0531651
-46.5443	729.806	-0.00238896	0.0807704	-36.0727	343.733	-0.000395372	0.0623316	-38.0791	345.88	-0.000133536	0.0666101	-23.6332	190.573	-1.5005e-05	0.0489446	-31.2078	253.71	-8.43961e-06	0.0577284	-28.0809	223.825	-2.06363e-07	0.0539651
-46.6755	735.087	-0.00240982	0.0810704	-36.2893	346.905	-0.000400626	0.0626316	-38.2746	348.764	-0.000135112	0.0669101	-23.9237	192.664	-1.5352e-05	0.0492446	-31.4421	256.085	-8.57007e-06	0.0580284	-28.3361	226.046	-2.10065e-07	0.0542651
-46.8058	740.385	-0.00243075	0.0813704	-36.5044	350.091	-0.000405903	0.0629316	-38.4688	351.659	-0.000136694	0.0672101	-24.212	194.765	-1.57008e-05	0.0495446	-31.6748	258.47	-8.70113e-06	0.0583284	-28.5894	228.278	-2.13785e-07	0.0545651
-46.9353	745.7	-0.00245175	0.0816704	-36.718	353.289	-0.000411202	0.0632316	-38.6619	354.566	-0.000138283	0.0675101	-24.4981	196.878	-1.60514e-05	0.0498446	-31.906	260.867	-8.83278e-06	0.0586284	-28.841	230.521	-2.17524e-07	0.0548651
-47.064	751.032	-0.00247282	0.0819704	-36.9301	356.5	-0.000416524	0.0635316	-38.8537	357.485	-0.000139878	0.0678101	-24.7821	199.002	-1.64039e-05	0.0501446	-32.1356	263.274	-8.96504e-06	0.0589284	-29.0908	232.775	-2.2128e-07	0.0551651
-47.1919	756.381	-0.00249396	0.0822704	-37.1407	359.724	-0.000421868	0.0638316	-39.0443	360.415	-0.000141479	0.0681101	-25.064	201.136	-1.67582e-05	0.0504446	-32.3636	265.692	-9.09789e-06	0.0592284	-29.3388	235.04	-2.25054e-07	0.0554651
-47.319	761.747	-0.00251517	0.0825704	-37.3499	362.961	-0.000427235	0.0641316	-39.2337	363.356	-0.000143087	0.0684101	-25.3438	203.282	-1.71143e-05	0.0507446	-32.5901	268.121	-9.23134e-06	0.0595284	-29.5851	237.315	-2.28846e-07	0.0557651
-47.4453	767.13	-0.00253646	0.0828704	-37.5576	366.211	-0.000432624	0.0644316	-39.422	366.309	-0.000144701	0.0687101	-25.6215	205.438	-1.74723e-05	0.0510446	-32.8151	270.561	-9.36539e-06	0.0598284	-29.8298	239.601	-2.32656e-07	0.0560651
-47.5709	772.53	-0.00255781	0.0831704	-37.7639	369.474	-0.000438036	0.0647316	-39.6091	369.273	-0.000146321	0.0690101	-25.8972	207.606	-1.78321e-05	0.0513446	-33.0386	273.011	-9.50003e-06	0.0601284	-30.0727	241.898	-2.36485e-07	0.0563651
-47.6957	777.947	-0.00257924	0.0834704	-37.9687	372.75	-0.000443471	0.0650316	-39.795	372.249	-0.000147948	0.0693101	-26.1708	209.784	-1.81938e-05	0.0516446	-33.2607	275.473	-9.63528e-06	0.0604284	-30.3139	244.206	-2.40331e-07	0.0566651
-47.8197	783.381	-0.00260074	0.0837704	-38.1722	376.039	-0.000448927	0.0653316	-39.9798	375.237	-0.000149581	0.0696101	-26.4425	211.974	-1.85573e-05	0.0519446	-33.4812	277.945	-9.77112e-06	0.0607284	-30.5535	246.525	-2.44195e-07	0.0569651

[truncated: 2 more sheets: Fig 7f k2'-k1, Suppl. Fig. 2 ee1 ee2]
